# Supplementary material for: Glucocorticoid receptor recruits to enhancers and drives activation by motif-directed binding
Source: HighWire-hosted journal article supplement (doi:10.1101/gr.233346.117), 2018-08-10
Supplement: Supplemental_material.docx [file Supplemental_material.docx]

Glucocorticoid Receptor Recruits to Enhancers and Drives Activation by Motif-directed Binding

Supplemental Material

Ian C. McDowell1,2, Alejandro Barrera2,3, Anthony M. D’Ippolito2,4, Christopher M. Vockley2,3,†, Linda K. Hong2,5,‡, Sarah M. Leichter2,3,§, Luke C. Bartelt2,3, William H. Majoros1,2, Lingyun Song2,5, Alexias Safi2,5, D. Dewran Koçak2,6, Charles A. Gersbach2,4,6,7, Alexander J. Hartemink1,2,8,9*, Gregory E. Crawford1,2,5,10*, Barbara E. Engelhardt11,12,13*, and Timothy E. Reddy1,2,3,4,6,10**

*1Graduate Program in Computational Biology & Bioinformatics, Duke University, Durham, NC, 27708, USA*

*2Center for Genomic & Computational Biology, Duke University, Durham, NC, 27708, USA*

*3Department of Biostatistics & Bioinformatics, Duke University Medical Center, Durham, NC, 27708, USA*

*4University Program in Genetics & Genomics, Duke University, Durham, NC, 27708, USA*

*5Department of Pediatrics, Duke University Medical Center, Durham, NC, 27708, USA*

*6Department of Biomedical Engineering, Duke University, Durham, NC, 27708, USA*

*7Department of Orthopaedic Surgery, Duke University Medical Center, Durham, NC, 27708, USA*

*8Department of Computer Science, Duke University, Durham, NC, 27708, USA*

*9Department of Biology, Duke University, Durham, NC, 27708, USA*

*10Department of Molecular Genetics and Microbiology, Duke University, Durham, NC, 27708, USA*

*11Lewis-Sigler Institute, Princeton University, Princeton, NJ, 08540, USA*

*12Department of Computer Science, Princeton University, Princeton, NJ, 08540, USA*

*13Center for Statistics and Machine Learning, Princeton University, Princeton, NJ, 08540, USA*

*†Present address: The Broad Institute of MIT and Harvard, Cambridge, MA, 02142, USA*

*‡Present address: Sequencing & Genomic Technologies Shared Resource, Durham, NC, 27701, USA*

*§Present address: Laboratory of Genetics, University of Wisconsin-Madison, Madison, WI, 53706, USA*

# Table of Contents

Table of Contents 2

Supplemental Results 3

Supplemental Results for “Motif-directed binding drives changes in EP300 occupancy at enhancers” 3

Supplemental Results for “Enhancer dynamics are coordinated by chromatin loops” 4

Supplemental Methods 5

Cell culture 5

Dex treatment 5

Cell cycle analysis 6

ChIP-seq 7

DNase-seq 8

RNA-seq 9

Sequencing data processing pipelines 9

Sequencing data quality control 11

Differential accessibility/binding/expression analysis and log fold change estimation 12

Functional enrichment analysis 13

Enhancer definition 14

Analysis of location of genomic events 14

Overlap and proximity analyses and co-localization analysis 14

Modeling change in gene expression data as a function of the presence of nearby dynamic enhancers 15

ChIP-seq and RNA-seq visualization 15

Controlling for chromatin accessibility by matching 15

GR binding analysis for short time course data 16

GR binding analysis for varied dex concentrations 16

GR binding and EP300 binding across cellular contexts 17

Analysis of timing of GC responsive events in enhancers 17

*De novo* motif analysis 18

HMM 18

Modeling change in EP300 binding from change in GR binding 19

GR binding site definition by duration 20

Known motif analyses 20

Exploratory combinatorial motif analyses 21

Spatial CTCF analysis 22

Supplemental Figures 23

Supplemental Figure 1. 23

Supplemental Figure 2. 25

Supplemental Figure 3. 27

Supplemental Figure 4. 29

Supplemental Figure 5. 31

Supplemental Figure 6. 32

Supplemental Figure 7. 34

Supplemental Figure 8. 35

Supplemental Tables 36

Supplemental Table 1. 36

Supplemental Table 2. 37

Supplemental Table 3. 38

Supplemental Table 4. 38

Supplemental Table 5. 39

Supplemental Table 6. 40

Supplemental Table 7. 41

References for Supplementary Materials 42

# Supplemental Results

## Supplemental Results for “Motif-directed binding drives changes in EP300 occupancy at enhancers”

We corroborated our results on enhancer dynamics by scoring and comparing enhancers by the strength of motifs for GR, CEBPB, and a representative AP-1 factor (FOSL2), which we discovered in the strongest ChIP-seq peaks by a *de novo* search (Supplemental Fig. 4F). Furthermore, an independent *de novo* motif search specifically within enhancer classes by timing of differential EP300 binding also yielded concordant results.

To explore the relationship between GR and CEBPB as well as GR and the AP-1 complex, we scored enhancers by motif strength quintile then binned enhancers across pairwise motif quintiles. We used the FOSL2 motif as representative of AP-1 motifs generally because FOSL2 had the greatest percentage of top peaks with an AP-1-like motif among all AP-1 factors tested and *de novo* motifs discovered across all AP-1 factors assayed were nearly identical. We computed the median occupancy and change in occupancy per bin (as seen in Supplemental Fig. 4G, *outset*). Initially, enhancer activity in terms of occupancy of pioneer factors, EP300, and H3K27ac correlated with the strength of the CEBPB and AP-1 factor motifs (column 1 in Supplemental Fig. 4G,H), consistent with the results described above (Supplemental Fig. 4A). Enhancers with the strongest GR motifs had little initial activity (Supplemental Fig. 4G,H), consistent with the observation that the GR motif was not predictive of initial EP300 binding (Supplemental Fig. 4A). Upon dex exposure, however, GR bound more strongly to enhancers with strong GR motifs, and increases in EP300 and H3K27ac occupancy rapidly followed suit (Supplemental Fig. 4G,H). After two hours of dex exposure, EP300 and H3K27ac increasingly favored enhancers with both strong GR and strong CEBPB motifs (Supplemental Fig. 4G). Nearly simultaneously, EP300 and H3K27ac increasingly favored enhancers with strong GR and weak AP-1 complex motifs, although the effect was more subtle (Supplemental Fig. 4H). Together, our results demonstrate that initial enhancer activity and direct GR binding primarily determine dex-responsive enhancer dynamics, while the direct binding of other factors like CEBPB and AP-1 factors may refine these dynamics.

## Supplemental Results for “Enhancer dynamics are coordinated by chromatin loops”

Approximately twice as many enhancers were located within loop anchors than a comparable set of distal DHSs that did not overlap enhancers (Fisher’s exact test, P < 10-100; Fig. 6C). Enhancers with greater initial activation in terms of H3K27ac/H3K4me1 were more likely to be located within chromatin loop anchors (highest H3K27ac/H3K4me1 vs. all other quintiles, Fisher’s exact test, p < 8.8 × 10-24; Fig. 6D). Furthermore, there was a combinatorial effect such that if an enhancer resided within one anchor of a chromatin loop, then the other anchor of the chromatin loop was 2.9 times more likely to also contain an enhancer (Fisher’s exact test, P = 3.7 × 10-55).

# Supplemental Methods

## Cell culture

A single seed culture of human A549 cells was obtained from Duke University Cell Culture Facility (obtained ultimately from ATCC) and expanded under standard culture conditions using Ham's F-12K (Kaighn's) Medium, 10% FBS, 1% penicillin-streptomycin. Cells were received at passage 83, seeded, passed three more times, then viably frozen in 55 aliquots of 10 × 106 cells at passage 87. Then, for each batch of assays, we seeded one frozen aliquot in a square 500 cm2 dish and cultured the cells for four days with a media change typically on the second day. Starting on day four, cells were cultured in an assay-specific manner.

For ChIP-seq, cells were split into five 500 cm2 plates on day four, then split into a total of 20 500 cm2 square plates on day seven, and harvested on day ten. All culturing was performed with 100 mL of growth media per plate. Eighteen of the plates were treated with dex and harvested for ChIP, while two were used to estimate the number of cells per plate. For DNase-seq and RNA-seq, cells were split into 12 150 mm2 dishes with 20 mL of media per dish. Cells were treated and harvested three days later. For RNA-seq, cells were further seeded into one six-well plate on day four in 3 mL of growth media, and were treated and harvested three days later.

## Dex treatment

For all assays, cells reached confluence approximately two days after the final passaging step. At that point, cells were treated with 100 nM dex or an equal volume of EtOH (0.1% for RNA-seq, 0.02% for all other assays) for 0, 0.5, 1, 2, 3, 4, 5, 6, 7, 8, 10, or 12 hrs or for 5, 10, 15, 20, or 25 minutes for the short time course. Dex was added in a staggered manner so that all time points were harvested at the same time (Fig. 1A) with the exception of cells harvested for DNase-seq, which were harvested by staggering the time points to end 30 min apart from one another. This was done because the protocol requires several steps to be completed before the chromatin is stable. For more details on dex treatment, see Supplemental Methods.

Cells were treated with dex by tilting plates to the side and diluting 5 mM dex into the gathered media to a final concentration of 100 nM. The plates were then tilted side-to-side and front-to-back five times each to disperse the dex evenly throughout the media. For ChIP-seq, three plates were treated for each time point. For DNase-seq, two plates were treated for each time point. For RNA-seq, each well of a six-well plate was treated for each time point. Time points 1, 2, 3, 4, 5, and 6 were always treated and harvested in the same day and time points 0, 0.5, 7, 8, 10, and 12 were treated and harvested on separate days.

## Cell cycle analysis

Distribution of A549 cells across phases of the cell cycle was determined via propidium iodide staining. Cells were grown in six-well plates as described above, and treated with 100 nM dex for 0, 1, 4, 8, and 12 hours. As a negative control, an additional untreated condition was included with cells at ~50% confluence. Cells were grown in triplicate, except for the ~50% confluence control, for which cells were grown in duplicate. At the end of treatment, cells were trypsinized and counted. For each sample, we centrifuged 1 × 106 cells at 1000 rpm for 3.5 min. Next, we washed cells with 5 mL of 1X PBS, recentrifuged, removed the supernatant, and resuspended in 300 μL 1X PBS. We added 700 μL of ice-cold 100% EtOH and incubated on ice for 15 min. Next, we centrifuged cells at 2500 rpm for 3 min, removed the supernatant, and washed the cell pellet with 1 mL 1X PBS. We centrifuged the cells again at 2500 rpm for 3 min, resuspended the cells in 1 mL of labeling solution, and incubated at 37ºC for 30 min. Labeling solution was made using: 30 mL 1X PBS with 0.05% Triton X-100, 150 μL of 10 mg/mL RNase A, and 600 μL of 1 mg/mL propidium iodide. Cells were assayed via flow cytometry on a Sony SH800. Cell cycle analysis was performed using FlowJo.

## ChIP-seq

Before harvesting for ChIP-seq, cells from one untreated plate were used to obtain a cell count, which we required to be approximately 60 × 106. For each batch of ChIP-seq assays, we harvested cells from 18 500 cm2 square plates. To harvest, cells were crosslinked for 10 min at room temperature with 1% formaldehyde in media. The reaction was quenched for 5 min at room temperature in 0.125 M glycine. After quenching, media was removed and cells were washed once with 100 mL of 1X PBS at 4°C. Cells were then lysed in 15 mL of Farnham lysis buffer (5 mM PIPES pH 8, 85 mM KCl, 0.5% NP-40) with added protease inhibitor (Sigma product #11836153001 and 11836145001) added to the plate and tilted side-to-side. Cells were manually scraped from the plate and pipetted into 50 mL conical tubes, then pelleted by centrifugation at 2,000 rpm for 5 min at 4°C. The supernatant was removed and the pelleted cells were frozen on dry ice and stored at -80°C for downstream processing.

Cells were sheared in aliquots of 20 × 106 cells in 300 μL of 4°C RIPA buffer (1X PBS, 1% NP-40, 0.5% sodium deoxycholate, 0.1% SDS) with added protease inhibitor on the Biorupter Twin for 45 min on High using 30 seconds ON/30 seconds OFF. After shearing, the cells were centrifuged at 14,000 rpm for 15 min at 4°C. Supernatant from time points harvested from the same plate were collected and recombined, and 15 μL of supernatant was reserved to serve as a shearing size check and input control. The remaining sheared chromatin was split into 10 × 106 cell aliquots in 300 μL RIPA, snap frozen, and stored at -80°C. Next, 45 μL of RIPA buffer was added to the size check and split into two 30 μL aliquots. Then, to check the size of the sheared chromatin, 200 μL of IP elution buffer (1% SDS, 0.1M NaHCO3) was added to one of the 30 μL aliquots and incubated at 65°C overnight to reverse the crosslinks. Reverse-crosslinked chromatin was cleaned using the Qiagen PCR Purification kit and purity was checked using an Agilent Tapestation Genomic Tape.

ChIP was performed as described previously (Reddy et al. 2009). Reverse cross-linked ChIP'ed DNA was cleaned using the Qiagen PCR Purification kit. Post-IP concentration was determined using Invitrogen's Qubit dsDNA High Sensitivity and Broad Range assay kit. Sequencing libraries were prepared using 7 ng input of ChIP'ed DNA and the Kapa Biosystems Hyper Prep kit for Illumina sequencing. Samples were barcoded with Illumina Truseq indexes and normalized to 10 nM after library preparation. Final libraries were pooled—twelve libraries per pool for TFs and six libraries per pool for histone modifications—and run on a HiSeq 2000/2500 to generate 50 bp single-end reads.

## DNase-seq

DNase-seq experiments were performed as previously described (Song and Crawford 2010), with the exception of using a linker containing a 5’-phosphate group to increase ligation efficiency. Barcoded DNase-seq libraries were sequenced on the Illumina HiSeq4000 platform with four barcodes per lane to generate 50 bp single-end reads, of which only the first 20 bp were genomic DNA due to MmeI digestion.

## RNA-seq

Cell culture media was removed from each well and cells were washed twice with 3 mL 1x PBS. Next, 350 μL of 1:10 mixture of β-mercaptoethanol and Qiagen Buffer RLT were added to each well. With the plate on ice, cells from each well were pipetted up and down five times with a syringe while rinsing the well. The lysate was then transferred to a 1.5 mL tube, snap frozen, and stored at -80°C. Total RNA was isolated using the Qiagen RNeasy mini kit including the on-column DNase digestion with the Qiagen RNase-free DNase following manufacturer's protocol. The amount of RNA was quantified using a Nanodrop instrument, and RNA quality was assessed using an Agilent TapeStation 2200 with RNA ScreenTape. Stranded mRNA sample preparation was performed using 1 μg of total RNA on the Apollo 324 system with the Wafergen PrepX PolyA 48 for mRNA capture and PrepX mRNA 48 protocol for cDNA synthesis. The Q5 High Fidelity DNA Polymerase kit (New England Biolabs) was used for PCR following manufacturer's conditions. The post PCR product was cleaned using the Apollo 324 PCR Cleanup 48 protocol. Final libraries were pooled—twelve libraries per pool—and run across two lanes on a HiSeq 2000/2500 to generate 50 bp paired-end reads.

## Sequencing data processing pipelines

Sequencing data processing pipelines are freely available online at https://github.com/Duke-GCB/GGR-cwl. Raw sequencing reads were processed with assay-specific pipelines. For ChIP-seq and RNA-seq, overrepresented, contaminating sequences were discovered using FastQC (v.0.11.3;Andrews 2010). Contaminants and low-quality bases were trimmed using trimmomatic (v.0.32; Bolger et al. 2014), with arguments: adapters_and_contaminants.fa:2:30:15 LEADING:3 TRAILING:3 SLIDINGWINDOW:4:20 MINLEN:15. For DNase-seq, custom barcodes were removed. For all assays, reads were then mapped to GRCh38 (GCA_000001405.15_GRCh38_no_alt_analysis_set.fna). For mapping, we used bowtie (v.0.12.9; Langmead et al. 2009) for ChIP-seq and DNase-seq and STAR aligner (v.2.4.1a; Dobin et al. 2013) with 2-pass mapping as described previously (Engstrom et al. 2013) for RNA-seq. DNase-seq and ChIP-seq mappings were filtered to exclude ENCODE blacklist regions (The ENCODE Project Consortium 2012). DNase-seq mappings were filtered for PCR artifacts as described previously (Boyle et al. 2011).

ChIP-seq peaks were called within-replicate using MACS2 (v.2.1.0.20151222; Zhang et al. 2008) with parameters --nomodel --extsize $EXTSIZE -g hs with --broad --broad-cutoff 0.1 for H3K9me3 and -q 0.05 for all other libraries. The argument $EXTSIZE was given as the fragment length estimated by SPP (v.2.0; Kharchenko et al. 2008). DNase-seq peaks were called across replicates and within time point using MACS2 with parameters -q 0.10 --nomodel --shift -100 --ext 200. ChIP-seq, DNase-seq, and RNA-seq reads were quantified in features of interest using featureCounts (v.1.4.6-p4; Liao et al. 2014). For ChIP-seq, reads were extended in the 3'-direction by half the SPP-estimated fragment length and at least half the extended read length was required to map to the fragment of interest. For DNase-seq, simple overlap of 1 bp was required. For RNA-seq, read counts were quantified in gene body exons annotated by GENCODE (v.22; Harrow et al. 2012) and both paired-end reads were required to map to the same gene to be counted.

To enable portability and reproducibility of processing pipelines, we implemented them using the Common Workflow Language (CWL). Briefly, CWL is a specification for describing analysis workflows recipes and tool interfaces. The processing pipelines are freely available online (https://github.com/Duke-GCB/GGR-cwl).

## Sequencing data quality control

For ChIP-seq, all libraries were required to have a PCR bottleneck coefficient (PBC) of at least 0.5 and at least two replicates per time point were required to have a relative strand cross-correlation (RSC) of at least 0.8 (Supplemental Table 4; The ENCODE Project Consortium 2012). Additional samples were filtered based on low correlation across samples. Briefly, we merged called peaks from each sample into a union peak set using bedtools (v.2.25.0; Quinlan and Hall 2010) *merge* utility to merge book-ended or overlapped peaks, quantified counts from each library within the union peak set, correlated counts across libraries, and hierarchically clustered samples with complete linkage and 1 minus the Pearson correlation coefficient as the distance metric. Samples were manually filtered by visual inspection (Supplemental Fig. 8). After sample filtering, all time points were required to have at least 2 replicates.

For DNase-seq, libraries were required to have a PCR bottleneck coefficient (PBC) of at least 0.5, an NSC of at least 1.1, and an RSC of at least 1 (Supplemental Table 4; The ENCODE Project Consortium 2012). All sequenced DNase-seq libraries passed these filters. Correlations were computed as above for ChIP-seq. We found that the majority of samples closely clustered into a group with very high across-sample correlation coefficients (Supplemental Fig. 8). The rest of the samples had much lower across-sample correlation coefficients and were excluded from future downstream analyses. After sample filtering, all time points were required to have at least 4 replicates.

For RNA-seq, samples were required have >30 M aligned reads (The ENCODE Project Consortium 2012); however, an exception was made for one sample with 29.3 M aligned reads (Supplemental Table 4). All samples were required to have a mean across-sample Pearson correlation coefficient in gene-level TPM of at least 0.9 (Supplemental Fig. 8). After sample filtering, all time points were required to have at least 3 replicates.

## Differential accessibility/binding/expression analysis and log fold change estimation

All differential binding and expression analyses were performed using the negative binomial model implemented in edgeR (v.3.8.6; Robinson et al. 2010). We controlled for batch effects by incorporating significant surrogate variables estimated using svaseq (v.3.12.0; Leek 2014) into the model as covariates. We excluded surrogate variables that significantly correlated with time (Pearson correlation, *t*-test, *P* < 0.01) or significantly differed at the pre-dex time point (pre-dex vs. dex-exposed, *t*-test, *P* < 0.01). If this step were not performed, then the strong effects of dex would have been artificially removed. For example, low GR binding at the pre-dex time point would have been artificially inflated toward the binding levels at post-dex time points. For ChIP-seq, we used a custom normalization method designed to be sensitive to both sequencing depth and signal-to-noise ratio. More specifically, we used the total number of mapped reads as library size (lib.size in edgeR). We used NCIS to compute the ratio of ChIP to control library size in non-enriched (non-peak) regions (Liang and Keles 2012). Because the NCIS ratio is necessarily inversely proportional to sequencing depth of the control library, we multiplied mapped library size of the control library by the NCIS ratio to yield a measure of the signal-to-noise ratio. We took the reciprocal of these values, scaled them to one across samples, and used these scaled values as normalization factors (norm.factors in edgeR). This was performed so that the effective library size was increased for noisier libraries and decreased for libraries with cleaner signal, codifying our increased confidence in reads from libraries with higher signal-to-noise. For ChIP-seq, DNase-seq, RNA-seq, we used a prior count to increase shrinkage of log2 fold-change estimates (edgeR prior.count argument set to 5 for ChIP- and RNA-seq and 10 for DNase-seq). For DNase-seq and RNA-seq, normalization was performed using the trimmed mean of M-values method (Robinson and Oshlack 2010) as implemented in edgeR (Robinson et al. 2010). Differential sites/genes were called by comparing each dex-exposed time point to the singular pre-dex time point.

ChIP-seq and DNase-seq peaks were considered to have differentially increased signal if they had significantly higher signal than pre-dex (FDR < 0.1) for at least one time point and never had significantly lower signal than pre-dex (FDR > 0.2). The reverse criteria were applied to peaks considered to have differentially decreased signal. For RNA-seq, a similar scheme was used for classifying up-regulated and down-regulated genes with a more stringent differential threshold (FDR < 0.01).

## Functional enrichment analysis

We annotated all expressed GENCODE (v.22; Harrow et al. 2012) protein-coding genes (at least one read count) with Biological Process Gene Ontology terms (Ashburner et al. 2000). Based on a ranking of evidence codes in (Buza et al. 2008), we retained only those gene ontology annotations with the following seven evidence codes: EXP, IDA, IGI, IMP, IPI, IC, and TAS. We tested for functional enrichment using goatools with Benjamini-Hochberg FDR correction (Tang et al. 2015). While goatools returns the unconditional Maximum Likelihood Estimate (MLE) of the odds ratio, we computed and plotted the conditional MLE using the R stats function fisher.test, which also yields a confidence interval of the odds ratio.

## Enhancer definition

To identify putative active enhancers, we took the union of EP300 peaks across all replicates and time points. To qualify as an active enhancer, a EP300 peak was required to be >3 kb from the nearest protein-coding gene TSS, to overlap a DHS present for at least one time point, and to be within 500 bp of an H3K4me1 peak and an H3K27ac peak for at least one time point each. In order to remain initially agnostic to the dynamics of these features and to maximize sensitivity, we did not require features to be present at the same time point. Enhancer boundaries were taken to be identical to EP300 merged union peak boundaries.

## Analysis of location of genomic events

Genomic events were annotated by location with respect to protein-coding gene annotations from GENCODE (v.22; Harrow et al. 2012) using the R package ChIPseeker (Yu et al. 2015). POL2RA ChIP-seq peaks were taken from GSE32465 (The ENCODE Project Consortium 2012).

## Overlap and proximity analyses and co-localization analysis

For co-localization analyses and proximity analyses, overlap and distances between sets of genomic elements were computed using the bedtools (v.2.25.0) utilities *intersect* and *closest*, respectively (Quinlan and Hall 2010; Dale et al. 2011).

## Modeling change in gene expression data as a function of the presence of nearby dynamic enhancers

To test whether the number of dynamic enhancers was associated with the change in gene expression, standardized mean log2 fold change in gene expression was regressed on binary presence/absence of a dynamic enhancer (activated and deactivated enhancers as separate variables) within 20 kb. This model was fit with and without an additional variable that contained the number of additional dynamic enhancers within the same flank (beyond 1). The two nested models were compared by Chi-squared test.

## ChIP-seq and RNA-seq visualization

To visualize ChIP-seq and DNase-seq read density, RPM was computed at single bp resolution using deepTools utility bamCoverage. For ChIP-seq, input control RPM was subtracted from ChIP RPM, truncating the difference as zero. Mean RPM was computed across replicates. For selected Fig. (Fig. 2A, S2D, 3D, and 3E), quantified signal was binned around features of interest using deepTools utility computeMatrix (v.2.3.5; Ramirez et al. 2014).

To visualize RNA-seq expression, gene-level counts were converted to transcripts per million (TPM) as in (Wagner et al. 2012), with gene length computed as the total exonic length of the gene model annotation in GENCODE (v.22; Harrow et al. 2012).

## Controlling for chromatin accessibility by matching

ChIP-seq is biased towards representation of chromatin-accessible regions (Ramachandran et al. 2015). To control for differences in accessibility when comparing, for example, enhancers to distal non-EP300-bound DHSs, we first computed the DNase-seq counts per million (CPM) across replicates for each site. Depending on the analysis, the mean CPM across all time points was then computed (Fig. 1F, 1G, S1G, S1H, S1K) or only the initial pre-dex time point was retained (Fig. 2A and S2A). To compare enhancers and distal DHSs, we sorted in ascending order the sites of the smaller set, enhancers, by accessibility. We then randomly selected a site from the larger set, distal DHSs, which had accessibility greater than the first sorted site of smaller set and lesser than the second sorted site of the smaller set. The matching process continued in this manner until all sites in the smaller set were matched with a site in the larger set. If no matching site in the larger set could be found, then the site from the smaller set was excluded. After the matching process, we confirmed that accessibility did not significantly differ across the sets.

## GR binding analysis for short time course data

In the analysis of GR binding by quintiles in the short time course data (every 5 min for first 30 min), initial enhancer activation for each enhancer was determined as initial pre-dex EP300 and flanking H3K27ac occupancy in standardized log2 CPM projected onto principal component resultant from PCA decomposition. GR motif strength of enhancers was computed as described above using FIMO (Grant et al. 2011).

## GR binding analysis for varied dex concentrations

In the analysis of GR binding by varying dex concentrations (Reddy et al. 2012), we processed the data using our pipelines described above and counted reads in enhancers and log2 fold change in GR binding using featureCounts and edgeR (Robinson et al. 2010; Liao et al. 2014), respectively, as described above. Enhancers with >1.5 fold increase in GR binding at 0.5 nM dex were considered dex hypersensitive. Those with >1.5 fold increase at 5 nM dex and not at 0.5 nM dex were considered dex medium-sensitive. Those with >1.5 fold increase only at 50 nM dex were considered dex low-sensitive.

## GR binding and EP300 binding across cellular contexts

We downloaded a variety of GR, pioneer factor (CEBPB and JUN), and EP300 binding data from external studies (see Supplemental Table 5). All GR sites were extended or trimmed to 1000 bp in width. We compared GR motif strength in GR binding sites by intersection (+/-) with EP300 binding sites and across cellular contexts. An extended GR site was considered overlapping an EP300 site if at least 1 bp overlapped between sites or sites were book-ended. Extended GR sites were scored by GR motif strength using FIMO and JASPAR motif MA0113.3 (Sandelin et al. 2004; Grant et al. 2011). FIMO motif *P*-values were then discretized into quintiles for display.

## Analysis of timing of GC responsive events in enhancers

Here and throughout, occupancy and accessibility were quantified in enhancers and log2 fold change was computed using featureCounts and edgeR, respectively (Robinson et al. 2010; Liao et al. 2014) as described above. We computed the proportion of enhancers that had differential signal prior to or at each dex exposure time point (Fig. 3B and 3C), and computed the median response time as the time by which half of differential sites had cumulatively differential signal. To estimate this median cumulative response time for each data set, a piecewise cubic Hermite interpolating polynomial was fit to the cumulative differential response curve and the time point at which that curve surpassed 0.5 was taken as the median. This interpolation was chosen in order to smooth values yet retain monotonicity.

## *De novo* motif analysis

To search for *de novo* motifs in TF binding sites, the top 500 binding sites by total normalized density summed across replicates and time points were subsetted and the sequences were trimmed to the central 200 bp. MEME (v.4.10.0;Bailey et al. 2009) was run with a second-order Markov background file to control for mono- and dinucleotide content and with the parameters "-mod zoops -revcomp -dna -minw 5 -maxw 12" for all motifs except for GR and CTCF, in which -maxw was set to 15. These options parameterized a search for motifs with zero or one occurrence in each sequence with motif widths between 5 and 12 or 15 bp.

## HMM

A linear-structured five-state HMM was trained on DNA fragments immunoprecipitated with GR and found to enhance transcriptional activity in STARR-seq reporter in 3 hr of dex treatment in comparison to pre-dex control (Vockley et al. 2016). The model was symmetrically structured to match DHSs flanked on either side by nucleosomes bearing histone marks indicative of active enhancers. Each state possessed a joint probability distribution over DNase- and ChIP-seq measurements pre-dex together with a single dex-exposed time point, to capture cumulative changes in response to treatment as observed at any given point in time. These distributions were characterized by a mean vector and covariance matrix. DNase- and ChIP-seq data (EP300, H3K27ac, H3K4me1, H3K4me2) for each putative element were standardized across time points to have mean 0 and standard deviation 1. Elements were centered on EP300 peaks identified by MACS2 (v.2.1.0.20151222; Zhang et al. 2008) and resized to 2000 bp. Expectation maximization (EM) was employed for learning means and covariances of a separate multivariate Gaussian distribution for emissions within each state, as well as probabilities of transitioning between states. The model was trained on DNase- and ChIP-seq features from pre-dex and 3 hr of dex exposure, for a total of ten features. EM was continued until the log likelihood increased by less than 0.01; all runs converged in under 150 iterations. One hundred models were randomly initialized and trained via EM. The model achieving the highest likelihood on the training set was retained as the single foreground model. A single-state background model was trained on reporter-negative elements.

Putative enhancers were scored by computing the log-likelihood ratio (LLR) of each enhancer under the foreground model versus the background model. AUC values were computed using these LLRs; reported values are arithmetic means of five-fold cross-validation applied to a total of 1229 reporter-positive and 1235 reporter-negative elements. An additional set of 300 models were trained on the full set of 1229 reporter-positive elements and the model with the highest likelihood was selected for deployment genome-wide.

## Modeling change in EP300 binding from change in GR binding

We ran a series of univariate linear regression models regressing change in EP300 binding on change in GR binding across the time course and across various subsets of enhancers based on EP300 dynamics (all, up, down, non-dynamic). To test whether the coefficient significantly differed across different classes of enhancers by EP300 dynamics, we added an additional variable, which was an interaction term combining the enhancer class by dynamics and the change in GR binding. A significant p-value associated with the coefficient representing this interaction term was interpreted to mean that different classes of enhancers by EP300 dynamics differed in the relationship between change in GR binding and change in EP300 binding.

## GR binding site definition by duration

For several analyses (Fig. 5D,E and Supplemental Fig. 6D), the union of GR binding sites observed throughout the time course (5 min–12 hr dex) were split into subsets based on the final time point that they were observed above background. To obtain these subsets, we took the intersection of the union set with time point-specific sets of GR binding sites, which were derived from the merger of peaks observed in each replicate for a given time point. We then took the set difference of these sites and GR binding sites from all later time points.

## Known motif analyses

We modeled the initial pre-dex EP300 occupancy in enhancers and distal non-EP300 bound DHSs as a linear function of binary motif presence/absence of all RSAT-clustered (Castro-Mondragon et al. 2017) JASPAR motifs (2016, vertebrates; Sandelin et al. 2004). We searched for motifs using FIMO (v.4.10.0; Bailey et al. 2009) with a second-order Markov background model. In order to binarize motif calls, we ran models with different *P*-valuecutoffs(10-3, 10-4, 10-5) and found optimal predictive performance (*R2*) with *P* < 10-4. We fit the model using elastic net regression (Zou and Hastie 2005). The model was fit to 1,000 bootstrap replicates of the data to estimate standard errors on the coefficients.

We also modeled the increase in EP300 as a binary variable with a separate model for each class of enhancer with increased EP300: early-mid.-late (EML), early-mid. (EM), mid.-late (ML), early (E), mid. (M), and late (L) where early = 0.5–2 hrs dex, mid. = 3–6 hrs dex, late = 7–12 hrs dex. The background set included all repressed and non-dynamic enhancers. Predictor variables were binary FIMO motif calls at *P* < 10-4 as well as standardized initial log2 CPM EP300, which was included as a covariate to control for differences in baseline EP300. Logistic elastic net regression (Zou and Hastie 2005) was performed once again as above using the Python package scikit-learn (Pedregosa et al. 2011).

We also assessed motif strengths of all enhancers based on the *de novo* GR, CEBPB, and AP-1 factor motifs described above. In other words, motifs discovered by *de novo* motif search were in turn used as input in a known motif search. The FOSL2 motif was used as representative of AP-1 because FOSL2 had the greatest percentage of top peaks with an AP-1 motif among all AP-1 factors tested and the motifs discovered across all AP-1 factors assayed were nearly identical. To assign motif strengths, we scanned enhancers for the motifs using FIMO with a second-order Markov background model (Bailey et al. 2009) in the central 500-bp of each enhancer.

## Exploratory combinatorial motif analyses

To explore the relationship between pairs of motifs, we scored all identified enhancers by GR, CEBPB, and FOSL2 motif strength. Motif strength was computed as in “Known motif analyses” above. As above, we used the FOSL2 motif as representative of AP-1 motifs generally. We binned enhancers into motif strength quintile by motif, then further split these enhancers into 5×5 bins representative of the joint distribution of motif strengths across GR and CEBPB or GR and FOSL2. We computed the median occupancy and change in occupancy per bin for GR, CEBPB/FOSL2, EP300, and H3K27ac.

## Spatial CTCF analysis

To test whether enhancers with similar EP300 dynamics were enriched for co-occurrence within domains demarcated by CTCF, we first computed the proportion of enhancers with dynamic EP300 binding that occurred within homogeneous CTCF domains. A homogeneous CTCF domain was defined as a genomic interval between two CTCF sites where there were at least two enhancers with differential EP300 binding and all enhancers with differential EP300 binding had similar dynamics; that is, they all had increased or decreased binding. To test for enrichment, we did two kinds of permutations: (1) We randomly shuffled enhancers with differential EP300 across the union of enhancers with differential EP300 1,000 times. (2) We permuted CTCF positions, while retaining the same span in genomic sequence space of the observed set of CTCF domains and the same empirical distance distribution between CTCF sites by fixing the first CTCF site on each chromosome and permuting all distances between CTCF sites 1,000 times (Fig. 5E). For each permutation, we computed the proportion of enhancers in homogeneous CTCF domains for each individual permutation and fit a normal distribution to the array of permuted proportions to yield a Z-statistic for the observed data. The same methods were repeated for differentially expressed genes as well.

# Supplemental Figures

### Supplemental Figure 1.

Dynamics of the genomic glucocorticoid response. (A) Line plot shows mean log2 fold change in *CEBPB* over the time course as assayed by RNA-seq, quantified at the gene-level, and measured in transcripts per million (TPM). (B) Bar plot shows the percentage of A549 cells in each phase of the cell cycle across the dex time course (0–12) and in control, untreated cells at ~50% confluency, indicated by *C*. Bar height displays the mean proportion across replicates and error bars display standard deviation. (C) Bar plots show the conditional Maximum Likelihood Estimate of the log2 odds ratio of enrichment of gene ontology annotation terms in up-regulated genes (*left*) and down-regulated (*right*) versus non-differentially expressed genes. Bars are shaded by significance, as indicated, and error bars represent 95% confidence interval. (D) Schematic represents active enhancer definition where *open* means a DHS and *EP300*, *H3K27ac*, and *H3K4me1* represent ChIP-seq peaks. (E) Bar plot shows number of latent (H3K4me1-), poised (H3K4me1+, H2K27ac-) and preprogrammed (H3K27ac+) enhancers by initial pre-dex histone occupancy. (F) Aggregate profile plots show mean pre-dex input-subtracted ChIP-seq RPM per bp 1 kb upstream to 1 kb downstream from the center of all sites in the three classes in (E). (G) Heatmap shows bivariate probability density function (PDF) of initial H3K4me1 and H3K27ac along with marginal PDFs. (H) Plots show PDFs of initial log2 DNase-seq counts per million (CPM) in enhancers and non-EP300-bound distal DHSs before (*left*) and after (*right*) matching the sets of sites by this variable. (I) Bar plot shows the proportion of non-EP300-bound distal DHSs and enhancers by the number of TFs bound (among BCL3, CEBPB, CTCF, FOSL2, GR, HES2, JUN, JUNB). (J) Heatmaps show log2 fold change in enhancers in TF ChIP-seq, DNase-seq, and histone modification ChIP-seq over the time course with respect to pre-dex levels. Rows hierarchically clustered by complete linkage and sorted in descending order by change in signal. (K) Same as Figure 1G after excluding DHSs that overlap CTCF peaks.

### Supplemental Figure 2.

GR is recruited to enhancers. (A) Heatmap shows log2 fold change in GR binding from 0.5–12 hr dex exposure for all GR binding sites present during that same time period. Rows were hierarchically clustered by complete linkage and sorted in descending order by change in binding. (B) Same as A, except for GR binding sites present from 5–25 min dex exposure. (C) Venn diagram shows the number of distal non-EP300/non-CTCF DHSs—randomly subset to the same size as the enhancer set in Fig. 2C—that overlap GR binding sites at 5 min of dex exposure. (D) Identically matching GR motifs were found in the sets of enhancers, non-EP300-bound distal DHSs, and intergenic regions selected by shuffling DHSs genome-wide and excluding blacklist regions and EP300 sites. Motif sequences are shown in descending order of strength. The probability weight matrix used for motif search shown above as consensus logo. (E) Heatmaps show GR ChIP-seq input-subtracted RPM at one hr dex exposure in the three sets in (D) and ordered accordingly. Above, aggregate profile plots show mean input-subtracted RPM per bp across sites in heatmaps. Regions shown range from -1 to +1 kb from motif center. (F) Receiver operating characteristic curves corresponding to models in Fig. 2E. Inset shows detail of plot. (G) Same as Fig. 2E, except sites were excluded from model if they overlapped a CTCF site. (H) Violin plots show log2 DNase-seq CPM in sites that will become bound by GR and those that will not become bound by GR from 0.5—12 hr dex exposure among the union of enhancers and non-EP300 distal DHSs. (I) Same as Fig. 2E, except with TF ChIP-seq data sets excluded as predictors. (J) Heatmap shows the loadings from a PCA decomposition of the initial occupancy of EP300 and H3K27ac in enhancers. (K) Scree plot shows proportion of variance explained by each PC from (J). (L) Box-and-whisker plots of EP300 binding every five min for the first 25 min is shown across the set of all enhancers split into quintiles by GR motif strength. Observations greater than 1.5× interquartile range beyond first and third quartiles are shown as outliers. (M) Estimated coefficients of a series of linear models regressing change in GR binding by time point on GR motif strength and initial enhancer activation after standardizing all variables (equation shown above plot).

### Supplemental Figure 3.

Timing of GC-responsive changes in TF binding, histone modifications, and accessibility in enhancers. (A)Heatmaps show the proportion of enhancers with significantly differential ChIP-seq or DNase-seq signal at each time point split by increasing, decreasing, or overall differential signal as indicated. Outset heatmaps reflect ChIP-seq data from an independent short time course. (B) Same as (A), except heatmaps show cumulative proportion of enhancers with differential signal. (C) Same as (B), except each row is scaled to a maximum value of 1. (D) The first column in the array of heatmaps shows pre-dex input-subtracted ChIP-seq RPM and DNase-seq RPM in all enhancers that ultimately gain EP300 across the dex exposure time course. Subsequent columns of heatmaps show the change in RPM at each dex exposure time point compared to the pre-dex time point. Within each individual heatmap, each row represents a distinct enhancer and color corresponds to signal from -1 kb upstream of enhancer center to +1 kb downstream of enhancer center. (F) Same as Fig 4B, except here all TF ChIP-seq data are shown, as well as DNase-seq. (G) Same as Fig 4C, except here all TF ChIP-seq data are shown, as well as DNase-seq. (H) State-transition diagram of multivariate HMM shown with transition probabilities (*top*) and mean emission probability for each state, at 3 hr of dex exposure (*middle*) and pre-dex (*bottom*). (I) AUC values for classification of STARR-seq positive sites based on the features listed.

### Supplemental Figure 4.

The effects of motif-directed binding on EP300 occupancy in enhancers. (A) Barplot shows elastic net logistic regression coefficients for RSAT-clustered JASPAR TF motifs with non-zero coefficients (positive, *orange*; negative, *blue*) in the prediction of standardized pre-dex EP300 binding in the union of distal DHSs and enhancers. Error bars represent standard deviation across 1000 bootstrap replicates. Coefficients were considered non-zero if 95% confidence interval of estimate did not include zero. Naming scheme is detailed in Supplemental Table 7. (B) Schematic of strategy for categorizing dynamic enhancers. (C) Bar plot shows the number of enhancers in each dynamics category in (B). (D) Maximum log2 fold change in EP300 binding for each enhancer class with increased EP300 binding by dynamic class. (E) Same as (D) except for minimum log2 fold change is shown for enhancers with decreased EP300 binding. (F) Leftmost heatmaps shows change in EP300 binding by dynamic class (see B), with height of heatmap proportional to size of class. Enhancer motif strength for GR, CEBPB and AP-1 (FOSL2) motifs are shown (*left*) in the same order as the EP300 heatmap and after sorting into a cumulative distribution function (*right*). The extremes of the motif strength colormap correspond to the 5th and 95th percentiles. Consensus logos for each motif are shown at right, constructed from motifs within each quintile of the distribution of motif strengths. (G) Heatmaps display median occupancy or median change in occupancy over the dex exposure time course for selected ChIP-seq data sets in bins by quintile of CEBPB and GR motif strength. Note that occupancy and change in occupancy correspond to distinct colormaps. Outsets display change in EP300 binding for selected time points. (H) Same as (G), except for AP-1 (FOSL2) motif instead of CEBPB motif.

### Supplemental Figure 5.

(A) UCSC genome browser snapshot for region in the vicinity of the TSS of *HPCAL1* shows tracks—from *top* to *bottom*—for GENCODE (v.22) gene annotations, motif strength of enhancers, and basal and differential ChIP-seq and DNase-seq signal at selected time points where 0 represents pre-dex occupancy and ∆*t* represents the change in occupancy at time point *t* with respect to pre-dex occupancy. DNase-seq was measured in RPM and ChIP-seq in input-subtracted RPM. (B) Same as (A), except for vicinity of *NFIL3.* (C) Same as (A), except for vicinity of *TFPI2*. (D) Expression of *HPCAL1* as assayed by RNA-seq, quantified at the gene-level, and measured in TPM. (E) Same as (D), except for *NFIL3*. (F) Same as (D), except for *TFPI2*.

### Supplemental Figure 6.

Enhancer dynamics are spatially coordinated. (A) Cumulative distribution of distance of enhancers by dynamics class to nearest neighboring enhancer with increased EP300. (B) Same as (A), except distance computed to nearest neighboring enhancer with decreased EP300. (C) For varying distance bins, plot shows the mean correlation in log2 fold change in EP300 ChIP-seq signal between neighboring enhancers, given that both enhancers in the neighboring pair had increased EP300 or, alternatively, decreased EP300. Error bars reflect 95% confidence intervals. Dashed line separates distance bins from permutation. (D) Cumulative distribution of distance of sets of GR binding sites by the last time point at which GR was observed to bind above background to the nearest non-overlapping enhancer. (E) Same as (D), except GR binding site sets reflect binding at varying dex dosages. (F) Schematic of permutation method used to generate G and H, see Methods for more details. (E) Proportion of enhancers with differential EP300 binding in CTCF domains that had at least two enhancers with differential EP300 that were in homogeneous domains (all increased or all decreased EP300) in the observed data and in permutations obtained by shuffling CTCF positions (*CTCF*) or by shuffling the locations of enhancers with differential EP300 binding across the union of enhancers with differential EP300 binding (*enhancers*). Error bars reflect 95% confidence intervals. (F) Same as (E), except for differentially expressed genes (*DEGs*). (G) UCSC genome browser snapshot shows same region as Supplemental Fig. 5A with tracks for GENCODE (v.22) gene annotations, motif strengths of enhancers, and all chromatin loops (D'Ippolito et al. *In prep.*) that have both anchors within the selected region. Enhancers are colored by motif strengths and loops are colored by dynamics as indicated.

### Supplemental Figure 7.

Adaptation of the GGR Visual portal. (A and B) Users can search for one or multiple genes to interactively explore gene expression, TF binding, chromatin modifications, and chromatin accessibility. Here, we represent a static snapshot, but the website (http://ggr.reddylab.org) has a time control knob for exploring dynamics.

(C) Chromatin loops identified in (D'Ippolito et al. *In press*) are represented as segments connecting the midpoints of loop anchors. Log2 fold change of increased (*red*) and decreased (*blue*) interactions are shown for each loop, with stronger enrichment represented by thicker and more saturated color bars. Again, the website has a time control knob for exploring dynamics.

### Supplemental Figure 8.

Correlation across sequencing samples before and after sample filter. (A—N) Heatmaps show hierarchically clustered Pearson correlation coefficients for read counts within union peak sets across samples for each TF or histone modification ChIP-seq data set before and after filtering samples with low across-sample correlations. Rejected samples are indicated with *magenta*. (O) Same as (A—N), except for DNase-seq. (P) Same as (A—N), except for RNA-seq.

# Supplemental Tables

### Supplemental Table 1.

Antibodies used for ChIP-seq.

| Antibody | Source | Identifier |
| --- | --- | --- |
| Rabbit monoclonal EP300 | Santa Cruz Biotechnology | Cat#sc-32244; RRID:AB_628076 |
| Rabbit monoclonal HES2 | Santa Cruz Biotechnology | Cat#sc-166705; RRID:AB_2248333 |
| Rabbit monoclonal JUN | BD Biosciences | Cat#558036; RRID:AB_2130023 |
| Rabbit monoclonal JUNB | Santa Cruz Biotechnology | Cat#sc-8051; RRID:AB_2130023 |
| Rabbit polyclonal BCL3* | Santa Cruz Biotechnology | Cat#sc-185; RRID:AB_2255011 |
| Rabbit polyclonal CEBPB* | Santa Cruz Biotechnology | Cat#sc-150; RRID:AB_477593 |
| Rabbit polyclonal CTCF | Active Motif | Cat#61311; RRID:AB_2614975 |
| Rabbit polyclonal EP300* | Santa Cruz Biotechnology | Cat#sc-585; RRID:AB_2231120 |
| Rabbit polyclonal FOSL2* | Santa Cruz Biotechnology | Cat#sc-160; RRID:AB_2107084 |
| Rabbit polyclonal GR* | Santa Cruz Biotechnology | Cat#sc-1003; RRID:AB_631572 |
| Rabbit polyclonal H3K27ac | Abcam | Cat#ab4729; RRID:AB_2118291 |
| Rabbit polyclonal H3K4me1 | Abcam | Cat#ab8895; RRID:AB_306847 |
| Rabbit polyclonal H3K4me2 | Abcam | Cat#ab7766; RRID:AB_2560996 |
| Rabbit polyclonal H3K4me3 | Abcam | Cat#ab8580; RRID:AB_306649 |

* Antibody production has been discontinued.

### Supplemental Table 2.

Summary of total sequencing effort.

| Assay type | ChIP-seq | DNase-seq | RNA-seq |
| --- | --- | --- | --- |
| Number of libraries | 607 | 51 | 46 |
| Total num. of reads | 16,136,842,674 | 2,042,980,092 | 3,630,314,622 |
| Num. of replicates | 2–3 | 4–5 | 3–4 |
| Minimum num. of reads per replicate | 11,188,959 | 24,368,260 | 44,667,132 |
| Maximum num. of reads per replicate | 137,612,018 | 73,680,155 | 175,052,318 |
| Mean num. of reads per replicate | 26,732,808 | 40,205,349 | 78,630,699 |

### Supplemental Table 3.

ENCODE and GEO accession information for all submitted data (separate file).

### Supplemental Table 4.

Quality control statistics for all processed data (separate file).

### Supplemental Table 5.

Details on external data on the binding of GR, EP300, CEBPB, and JUN.

| Cellular context | TF | Accession* | Publication | Processing method |
| --- | --- | --- | --- | --- |
| HeLa | GR | GSE24518 | (Rao et al. 2011) | † |
| HeLa | EP300 | GSE61911 | (Kuznetsova et al. 2015) | † |
| Ishikawa | GR | GSE32465 | (The ENCODE Project Consortium 2012) | † |
| Ishikawa | EP300 | GSE32465 | (The ENCODE Project Consortium 2012) | † |
| Ishikawa | CEBPB | GSE32465 | (The ENCODE Project Consortium 2012) | † |
| 3134 | GR | GSE61236 | (Stavreva et al. 2015) | ‡ |
| 3134 | EP300 | GSE61236 | (Stavreva et al. 2015) | ‡ |
| 3134 | JUN | SRP007111 | (Biddie et al. 2011) | ‡ |
| AtT-20 | GR | GSE37235 | (Langlais et al. 2012) | † |
| AtT-20 | EP300 | GSE64516 | (Zhang et al. 2015) | † |
| Mouse liver | GR | GSE46047 | (Shen et al. 2012) | † |
| Mouse liver | EP300 | GSE46047 | (Grøntved et al. 2013) | † |

* Accessions beginning with “GSE” were from GEO database and those beginning with “SRP” were from SRA database.

† ChIP-seq peaks downloaded from Cistrome Data Browser (Mei et al. 2016).

‡ ChIP-seq raw reads processed in the same manner all data from this publication were processed to yield peaks.

### Supplemental Table 6.

Estimated median response times for change in TF binding, histone modification occupancy, and chromatin accessibility.

|  | Median response time in enhancers with increasing signal (hr) | Median response time in enhancers with decreasing signal (hr) |
| --- | --- | --- |
| GR | 0.18 | N/A |
| EP300 | 0.34 | 0.48 |
| JUN | 0.42 | 1.92 |
| JUNB | 0.52 | 1.43 |
| BCL3 | 0.77 | 4.33 |
| CEBPB | 0.9 | 1.17 |
| HES2 | 1.13 | 0.91 |
| FOSL2 | 1.04 | 1.04 |
| CTCF | 3.88 | N/A |
| DNase | 1.91 | 2.46 |
| H3K27ac | 0.86 | 0.94 |
| H3K4me1 | 4.41 | 6.57 |
| H3K4me2 | 3.85 | 9.77 |
| H3K4me3 | 5.23 | 8.74 |
| H3K9me3 | N/A | N/A |

### Supplemental Table 7.

Naming system for RSAT-clustered JASPAR transcription factor binding motifs (separate file).

# References for Supplementary Materials

Andrews S. 2010. FastQC: a quality control tool for high throughput sequence data. <http://www.bioinformatics.babraham.ac.uk/projects/fastqc>.

Ashburner M, Ball CA, Blake JA, Botstein D, Butler H, Cherry JM, Davis AP, Dolinski K, Dwight SS, Eppig JT. 2000. Gene Ontology: tool for the unification of biology. *Nat Genet* **25**: 25-29.

Bailey TL, Boden M, Buske FA, Frith M, Grant CE, Clementi L, Ren J, Li WW, Noble WS. 2009. MEME SUITE: tools for motif discovery and searching. *Nucleic Acids Res* **37**: W202-208.

Biddie SC, John S, Sabo PJ, Thurman RE, Johnson TA, Schiltz RL, Miranda TB, Sung MH, Trump S, Lightman SL et al. 2011. Transcription factor AP1 potentiates chromatin accessibility and glucocorticoid receptor binding. *Mol Cell* **43**: 145-155.

Bolger AM, Lohse M, Usadel B. 2014. Trimmomatic: a flexible trimmer for Illumina sequence data. *Bioinformatics* **30**: 2114-2120.

Boyle AP, Song L, Lee BK, London D, Keefe D, Birney E, Iyer VR, Crawford GE, Furey TS. 2011. High-resolution genome-wide in vivo footprinting of diverse transcription factors in human cells. *Genome Res* **21**: 456-464.

Buza TJ, McCarthy FM, Wang N, Bridges SM, Burgess SC. 2008. Gene Ontology annotation quality analysis in model eukaryotes. *Nucleic Acids Res* **36**: e12.

Castro-Mondragon JA, Jaeger S, Thieffry D, Thomas-Chollier M, van Helden J. 2017. RSAT matrix-clustering: dynamic exploration and redundancy reduction of transcription factor binding motif collections. *Nucleic Acids Res* **45**: e119.

D'Ippolito AM, McDowell IC, Barrera A, Hong LK, Leichter SM, Bartelt LC, Vockley CM, Majoros WH, Safi A, Song L et al. *In press*. Glucocorticoids modulate the pre-existing chromatin structure to regulate gene expression.

Dale RK, Pedersen BS, Quinlan AR. 2011. Pybedtools: a flexible Python library for manipulating genomic datasets and annotations. *Bioinformatics* **27**: 3423-3424.

Dobin A, Davis CA, Schlesinger F, Drenkow J, Zaleski C, Jha S, Batut P, Chaisson M, Gingeras TR. 2013. STAR: ultrafast universal RNA-seq aligner. *Bioinformatics* **29**: 15-21.

Engstrom PG, Steijger T, Sipos B, Grant GR, Kahles A, Ratsch G, Goldman N, Hubbard TJ, Harrow J, Guigo R et al. 2013. Systematic evaluation of spliced alignment programs for RNA-seq data. *Nat Methods* **10**: 1185-1191.

Grant CE, Bailey TL, Noble WS. 2011. FIMO: scanning for occurrences of a given motif. *Bioinformatics* **27**: 1017-1018.

Grøntved L, John S, Baek S, Liu Y, Buckley JR, Vinson C, Aguilera G, Hager GL. 2013. C/EBP maintains chromatin accessibility in liver and facilitates glucocorticoid receptor recruitment to steroid response elements. *EMBO J* **32**: 1568-1583.

Harrow J, Frankish A, Gonzalez JM, Tapanari E, Diekhans M, Kokocinski F, Aken BL, Barrell D, Zadissa A, Searle S et al. 2012. GENCODE: the reference human genome annotation for The ENCODE Project. *Genome Res* **22**: 1760-1774.

Kharchenko PV, Tolstorukov MY, Park PJ. 2008. Design and analysis of ChIP-seq experiments for DNA-binding proteins. *Nat Biotechnol* **26**: 1351-1359.

Kuznetsova T, Wang S-Y, Rao NA, Mandoli A, Martens JHA, Rother N, Aartse A, Groh L, Janssen-Megens EM, Li G et al. 2015. Glucocorticoid receptor and nuclear factor kappa-b affect three-dimensional chromatin organization. *Genome Biol* **16**: 264.

Langlais D, Couture C, Balsalobre A, Drouin J. 2012. The Stat3/GR interaction code: predictive value of direct/indirect DNA recruitment for transcription outcome. *Mol Cell* **47**: 38-49.

Langmead B, Trapnell C, Pop M, Salzberg SL. 2009. Ultrafast and memory-efficient alignment of short DNA sequences to the human genome. *Genome Biol* **10**: R25.

Leek JT. 2014. svaseq: removing batch effects and other unwanted noise from sequencing data. *Nucleic Acids Res* **42**: e161.

Liang K, Keles S. 2012. Normalization of ChIP-seq data with control. *BMC Bioinformatics* **13**: 199.

Liao Y, Smyth GK, Shi W. 2014. featureCounts: an efficient general purpose program for assigning sequence reads to genomic features. *Bioinformatics* **30**: 923-930.

Mei S, Qin Q, Wu Q, Sun H, Zheng R, Zang C, Zhu M, Wu J, Shi X, Taing L. 2016. Cistrome Data Browser: a data portal for ChIP-Seq and chromatin accessibility data in human and mouse. *Nucleic Acids Res*: gkw983.

Pedregosa F, Varoquaux G, Gramfort A, Michel V, Thirion B, Grisel O, Blondel M, Prettenhofer P, Weiss R, Dubourg V. 2011. Scikit-learn: Machine learning in Python. *J Mach Learn Res* **12**: 2825-2830.

Quinlan AR, Hall IM. 2010. BEDTools: a flexible suite of utilities for comparing genomic features. *Bioinformatics* **26**: 841-842.

Ramachandran P, Palidwor GA, Perkins TJ. 2015. BIDCHIPS: bias decomposition and removal from ChIP-seq data clarifies true binding signal and its functional correlates. *Epigenetics Chromatin* **8**: 33.

Ramirez F, Dundar F, Diehl S, Gruning BA, Manke T. 2014. deepTools: a flexible platform for exploring deep-sequencing data. *Nucleic Acids Res* **42**: W187-191.

Rao NAS, McCalman MT, Moulos P, Francoijs KJ, Chatziioannou A, Kolisis FN, Alexis MN, Mitsiou DJ, Stunnenberg HG. 2011. Coactivation of GR and NFKB alters the repertoire of their binding sites and target genes. *Genome Res* **21**: 1404-1416.

Reddy TE, Gertz J, Crawford GE, Garabedian MJ, Myers RM. 2012. The Hypersensitive Glucocorticoid Response Specifically Regulates Period 1 and Expression of Circadian Genes. *Mol Cell Biol* **32**: 3756-3767.

Reddy TE, Pauli F, Sprouse RO, Neff NF, Newberry KM, Garabedian MJ, Myers RM. 2009. Genomic determination of the glucocorticoid response reveals unexpected mechanisms of gene regulation. *Genome Res* **19**: 2163-2171.

Robinson MD, McCarthy DJ, Smyth GK. 2010. edgeR: a Bioconductor package for differential expression analysis of digital gene expression data. *Bioinformatics* **26**: 139-140.

Robinson MD, Oshlack A. 2010. A scaling normalization method for differential expression analysis of RNA-seq data. *Genome Biol* **11**: R25.

Sandelin A, Alkema W, Engström P, Wasserman WW, Lenhard B. 2004. JASPAR: an open‐access database for eukaryotic transcription factor binding profiles. *Nucleic Acids Res* **32**: D91-94.

Shen Y, Yue F, McCleary DF, Ye Z, Edsall L, Kuan S, Wagner U, Dixon J, Lee L, Lobanenkov VV et al. 2012. A map of the cis-regulatory sequences in the mouse genome. *Nature* **488**: 116-120.

Song L, Crawford GE. 2010. DNase-seq: a high-resolution technique for mapping active gene regulatory elements across the genome from mammalian cells. *Cold Spring Harb Protoc* **2010**: pdb.prot5384.

Stavreva DA, Coulon A, Baek S, Sung M-H, John S, Stixova L, Tesikova M, Hakim O, Miranda T, Hawkins M. 2015. Dynamics of chromatin accessibility and long-range interactions in response to glucocorticoid pulsing. *Genome Res* **25**: 845-857.

Tang H, Klopfenstein D, Pedersen B, Flick P, Sato K, Ramirez F, Yunes J, Mungall C. 2015. GOATOOLS: tools for gene ontology. <https://github.com/tanghaibao/goatools>.

The ENCODE Project Consortium. 2012. An integrated encyclopedia of DNA elements in the human genome. *Nature* **489**: 57-74.

Vockley CM, D'Ippolito AM, McDowell IC, Majoros WH, Safi A, Song L, Crawford GE, Reddy TE. 2016. Direct GR binding sites potentiate clusters of TF binding across the human genome. *Cell* **166**: 1269-1281.

Wagner GP, Kin K, Lynch VJ. 2012. Measurement of mRNA abundance using RNA-seq data: RPKM measure is inconsistent among samples. *Theory Biosci* **131**: 281-285.

Zhang F, Tanasa B, Merkurjev D, Lin C, Song X, Li W, Tan Y, Liu Z, Zhang J, Ohgi KA. 2015. Enhancer-bound LDB1 regulates a corticotrope promoter-pausing repression program. *Proc Natl Acad Sci USA* **112**: 1380-1385.

Zhang Y, Liu T, Meyer CA, Eeckhoute J, Johnson DS, Bernstein BE, Nusbaum C, Myers RM, Brown M, Li W et al. 2008. Model-based analysis of ChIP-Seq (MACS). *Genome Biol* **9**: R137.

Zou H, Hastie T. 2005. Regularization and variable selection via the elastic net. *J R Stat Soc Series B Stat Methodol* **67**: 301-320.
