# Supplementary material for: Glucocorticoid receptor recruits to enhancers and drives activation by motif-directed binding
Source: HighWire-hosted journal article supplement (doi:10.1101/gr.233346.117), 2018-08-10
Supplement: Supplemental_TableS3.xlsx [file Supplemental_TableS3.xlsx]

## Sheet: Sheet1
Assay	Experiment_ENCODE_Alias	Experiment_ENCODE_Accession	Experiment_GEO_Series	File_ENCODE_Alias	File_ENCODE_Accession	File_SRA_Accession
ChIP-seq	tim-reddy:BCL3.t00	ENCSR544GUO	GSE91283	tim-reddy:BCL3.t00_rep1_chip_seq_bam	ENCFF756QEQ	N/A
ChIP-seq	tim-reddy:BCL3.t00	ENCSR544GUO	GSE91283	tim-reddy:BCL3.t00_rep1_chip_seq_bigWig	ENCFF122HFJ	N/A
ChIP-seq	tim-reddy:BCL3.t00	ENCSR544GUO	GSE91283	tim-reddy:BCL3.t00_rep1_chip_seq_fastq	ENCFF388YMC	SRR5092967
ChIP-seq	tim-reddy:BCL3.t00	ENCSR544GUO	GSE91283	tim-reddy:BCL3.t00_rep1_chip_seq_narrowPeak	ENCFF273ZUK	N/A
ChIP-seq	tim-reddy:BCL3.t00	ENCSR544GUO	GSE91283	tim-reddy:BCL3.t00_rep2_chip_seq_bam	ENCFF897HCS	N/A
ChIP-seq	tim-reddy:BCL3.t00	ENCSR544GUO	GSE91283	tim-reddy:BCL3.t00_rep2_chip_seq_bigWig	ENCFF879CHN	N/A
ChIP-seq	tim-reddy:BCL3.t00	ENCSR544GUO	GSE91283	tim-reddy:BCL3.t00_rep2_chip_seq_fastq	ENCFF788EFB	SRR5092966
ChIP-seq	tim-reddy:BCL3.t00	ENCSR544GUO	GSE91283	tim-reddy:BCL3.t00_rep2_chip_seq_narrowPeak	ENCFF595ZVT	N/A
ChIP-seq	tim-reddy:BCL3.t00	ENCSR544GUO	GSE91283	tim-reddy:BCL3.t00_rep3_chip_seq_bam	ENCFF341IVB	N/A
ChIP-seq	tim-reddy:BCL3.t00	ENCSR544GUO	GSE91283	tim-reddy:BCL3.t00_rep3_chip_seq_bigWig	ENCFF129LCX	N/A
ChIP-seq	tim-reddy:BCL3.t00	ENCSR544GUO	GSE91283	tim-reddy:BCL3.t00_rep3_chip_seq_fastq	ENCFF366NYC	SRR5092968
ChIP-seq	tim-reddy:BCL3.t00	ENCSR544GUO	GSE91283	tim-reddy:BCL3.t00_rep3_chip_seq_narrowPeak	ENCFF407ANB	N/A
ChIP-seq	tim-reddy:BCL3.t05	ENCSR013KHB	GSE91191	tim-reddy:BCL3.t05_rep1_chip_seq_bam	ENCFF406ITW	N/A
ChIP-seq	tim-reddy:BCL3.t05	ENCSR013KHB	GSE91191	tim-reddy:BCL3.t05_rep1_chip_seq_bigWig	ENCFF736FDF	N/A
ChIP-seq	tim-reddy:BCL3.t05	ENCSR013KHB	GSE91191	tim-reddy:BCL3.t05_rep1_chip_seq_fastq	ENCFF673GDH	SRR5093250
ChIP-seq	tim-reddy:BCL3.t05	ENCSR013KHB	GSE91191	tim-reddy:BCL3.t05_rep1_chip_seq_narrowPeak	ENCFF329ENJ	N/A
ChIP-seq	tim-reddy:BCL3.t05	ENCSR013KHB	GSE91191	tim-reddy:BCL3.t05_rep2_chip_seq_bam	ENCFF643OWX	N/A
ChIP-seq	tim-reddy:BCL3.t05	ENCSR013KHB	GSE91191	tim-reddy:BCL3.t05_rep2_chip_seq_bigWig	ENCFF602AKK	N/A
ChIP-seq	tim-reddy:BCL3.t05	ENCSR013KHB	GSE91191	tim-reddy:BCL3.t05_rep2_chip_seq_fastq	ENCFF298UTN	SRR5093249
ChIP-seq	tim-reddy:BCL3.t05	ENCSR013KHB	GSE91191	tim-reddy:BCL3.t05_rep2_chip_seq_narrowPeak	ENCFF688PVG	N/A
ChIP-seq	tim-reddy:BCL3.t05	ENCSR013KHB	GSE91191	tim-reddy:BCL3.t05_rep3_chip_seq_bam	ENCFF309VTL	N/A
ChIP-seq	tim-reddy:BCL3.t05	ENCSR013KHB	GSE91191	tim-reddy:BCL3.t05_rep3_chip_seq_bigWig	ENCFF720BRQ	N/A
ChIP-seq	tim-reddy:BCL3.t05	ENCSR013KHB	GSE91191	tim-reddy:BCL3.t05_rep3_chip_seq_fastq	ENCFF338GDW	SRR5093248
ChIP-seq	tim-reddy:BCL3.t05	ENCSR013KHB	GSE91191	tim-reddy:BCL3.t05_rep3_chip_seq_narrowPeak	ENCFF266HCB	N/A
ChIP-seq	tim-reddy:BCL3.t10	ENCSR673OGC	GSE91314	tim-reddy:BCL3.t10_rep1_chip_seq_bam	ENCFF848LSM	N/A
ChIP-seq	tim-reddy:BCL3.t10	ENCSR673OGC	GSE91314	tim-reddy:BCL3.t10_rep1_chip_seq_bigWig	ENCFF543YHX	N/A
ChIP-seq	tim-reddy:BCL3.t10	ENCSR673OGC	GSE91314	tim-reddy:BCL3.t10_rep1_chip_seq_fastq	ENCFF501EQZ	SRR5093065
ChIP-seq	tim-reddy:BCL3.t10	ENCSR673OGC	GSE91314	tim-reddy:BCL3.t10_rep1_chip_seq_narrowPeak	ENCFF120MBR	N/A
ChIP-seq	tim-reddy:BCL3.t10	ENCSR673OGC	GSE91314	tim-reddy:BCL3.t10_rep2_chip_seq_bam	ENCFF729OTC	N/A
ChIP-seq	tim-reddy:BCL3.t10	ENCSR673OGC	GSE91314	tim-reddy:BCL3.t10_rep2_chip_seq_bigWig	ENCFF626NSL	N/A
ChIP-seq	tim-reddy:BCL3.t10	ENCSR673OGC	GSE91314	tim-reddy:BCL3.t10_rep2_chip_seq_fastq	ENCFF438YAV	SRR5093064
ChIP-seq	tim-reddy:BCL3.t10	ENCSR673OGC	GSE91314	tim-reddy:BCL3.t10_rep2_chip_seq_narrowPeak	ENCFF734DPQ	N/A
ChIP-seq	tim-reddy:BCL3.t12	ENCSR288EPV	GSE91236	tim-reddy:BCL3.t12_rep1_chip_seq_bam	ENCFF670KRA	N/A
ChIP-seq	tim-reddy:BCL3.t12	ENCSR288EPV	GSE91236	tim-reddy:BCL3.t12_rep1_chip_seq_bigWig	ENCFF930HBD	N/A
ChIP-seq	tim-reddy:BCL3.t12	ENCSR288EPV	GSE91236	tim-reddy:BCL3.t12_rep1_chip_seq_fastq	ENCFF296CTO	SRR5093393
ChIP-seq	tim-reddy:BCL3.t12	ENCSR288EPV	GSE91236	tim-reddy:BCL3.t12_rep1_chip_seq_narrowPeak	ENCFF375SNM	N/A
ChIP-seq	tim-reddy:BCL3.t12	ENCSR288EPV	GSE91236	tim-reddy:BCL3.t12_rep2_chip_seq_bam	ENCFF768SFL	N/A
ChIP-seq	tim-reddy:BCL3.t12	ENCSR288EPV	GSE91236	tim-reddy:BCL3.t12_rep2_chip_seq_bigWig	ENCFF068QGY	N/A
ChIP-seq	tim-reddy:BCL3.t12	ENCSR288EPV	GSE91236	tim-reddy:BCL3.t12_rep2_chip_seq_fastq	ENCFF577MQI	SRR5093392
ChIP-seq	tim-reddy:BCL3.t12	ENCSR288EPV	GSE91236	tim-reddy:BCL3.t12_rep2_chip_seq_narrowPeak	ENCFF199FIJ	N/A
ChIP-seq	tim-reddy:BCL3.t1	ENCSR215UXN	GSE91220	tim-reddy:BCL3.t1_rep1_chip_seq_bam	ENCFF821PBE	N/A
ChIP-seq	tim-reddy:BCL3.t1	ENCSR215UXN	GSE91220	tim-reddy:BCL3.t1_rep1_chip_seq_bigWig	ENCFF961XUV	N/A
ChIP-seq	tim-reddy:BCL3.t1	ENCSR215UXN	GSE91220	tim-reddy:BCL3.t1_rep1_chip_seq_fastq	ENCFF485WUK	SRR5093342
ChIP-seq	tim-reddy:BCL3.t1	ENCSR215UXN	GSE91220	tim-reddy:BCL3.t1_rep1_chip_seq_narrowPeak	ENCFF172UVX	N/A
ChIP-seq	tim-reddy:BCL3.t1	ENCSR215UXN	GSE91220	tim-reddy:BCL3.t1_rep2_chip_seq_bam	ENCFF926JRD	N/A
ChIP-seq	tim-reddy:BCL3.t1	ENCSR215UXN	GSE91220	tim-reddy:BCL3.t1_rep2_chip_seq_bigWig	ENCFF255XBZ	N/A
ChIP-seq	tim-reddy:BCL3.t1	ENCSR215UXN	GSE91220	tim-reddy:BCL3.t1_rep2_chip_seq_fastq	ENCFF711JUS	SRR5093344
ChIP-seq	tim-reddy:BCL3.t1	ENCSR215UXN	GSE91220	tim-reddy:BCL3.t1_rep2_chip_seq_narrowPeak	ENCFF766YEZ	N/A
ChIP-seq	tim-reddy:BCL3.t1	ENCSR215UXN	GSE91220	tim-reddy:BCL3.t1_rep3_chip_seq_bam	ENCFF321CXH	N/A
ChIP-seq	tim-reddy:BCL3.t1	ENCSR215UXN	GSE91220	tim-reddy:BCL3.t1_rep3_chip_seq_bigWig	ENCFF591XXA	N/A
ChIP-seq	tim-reddy:BCL3.t1	ENCSR215UXN	GSE91220	tim-reddy:BCL3.t1_rep3_chip_seq_fastq	ENCFF771JVN	SRR5093343
ChIP-seq	tim-reddy:BCL3.t1	ENCSR215UXN	GSE91220	tim-reddy:BCL3.t1_rep3_chip_seq_narrowPeak	ENCFF006FOB	N/A
ChIP-seq	tim-reddy:BCL3.t2	ENCSR904OTM	GSE91352	tim-reddy:BCL3.t2_rep1_chip_seq_bam	ENCFF995WLR	N/A
ChIP-seq	tim-reddy:BCL3.t2	ENCSR904OTM	GSE91352	tim-reddy:BCL3.t2_rep1_chip_seq_bigWig	ENCFF689DMS	N/A
ChIP-seq	tim-reddy:BCL3.t2	ENCSR904OTM	GSE91352	tim-reddy:BCL3.t2_rep1_chip_seq_fastq	ENCFF925ZVE	SRR5093174
ChIP-seq	tim-reddy:BCL3.t2	ENCSR904OTM	GSE91352	tim-reddy:BCL3.t2_rep1_chip_seq_narrowPeak	ENCFF792GDJ	N/A
ChIP-seq	tim-reddy:BCL3.t2	ENCSR904OTM	GSE91352	tim-reddy:BCL3.t2_rep2_chip_seq_bam	ENCFF230PCM	N/A
ChIP-seq	tim-reddy:BCL3.t2	ENCSR904OTM	GSE91352	tim-reddy:BCL3.t2_rep2_chip_seq_bigWig	ENCFF389RRF	N/A
ChIP-seq	tim-reddy:BCL3.t2	ENCSR904OTM	GSE91352	tim-reddy:BCL3.t2_rep2_chip_seq_fastq	ENCFF241YOX	SRR5093173
ChIP-seq	tim-reddy:BCL3.t2	ENCSR904OTM	GSE91352	tim-reddy:BCL3.t2_rep2_chip_seq_narrowPeak	ENCFF895DPJ	N/A
ChIP-seq	tim-reddy:BCL3.t2	ENCSR904OTM	GSE91352	tim-reddy:BCL3.t2_rep3_chip_seq_bam	ENCFF126CIL	N/A
ChIP-seq	tim-reddy:BCL3.t2	ENCSR904OTM	GSE91352	tim-reddy:BCL3.t2_rep3_chip_seq_bigWig	ENCFF802JFU	N/A
ChIP-seq	tim-reddy:BCL3.t2	ENCSR904OTM	GSE91352	tim-reddy:BCL3.t2_rep3_chip_seq_fastq	ENCFF253KJG	SRR5093172
ChIP-seq	tim-reddy:BCL3.t2	ENCSR904OTM	GSE91352	tim-reddy:BCL3.t2_rep3_chip_seq_narrowPeak	ENCFF180VWE	N/A
ChIP-seq	tim-reddy:BCL3.t3	ENCSR473CRE	GSE91270	tim-reddy:BCL3.t3_rep1_chip_seq_bam	ENCFF796UCB	N/A
ChIP-seq	tim-reddy:BCL3.t3	ENCSR473CRE	GSE91270	tim-reddy:BCL3.t3_rep1_chip_seq_bigWig	ENCFF666DXK	N/A
ChIP-seq	tim-reddy:BCL3.t3	ENCSR473CRE	GSE91270	tim-reddy:BCL3.t3_rep1_chip_seq_fastq	ENCFF365IFL	SRR5092928
ChIP-seq	tim-reddy:BCL3.t3	ENCSR473CRE	GSE91270	tim-reddy:BCL3.t3_rep1_chip_seq_narrowPeak	ENCFF220EXY	N/A
ChIP-seq	tim-reddy:BCL3.t3	ENCSR473CRE	GSE91270	tim-reddy:BCL3.t3_rep2_chip_seq_bam	ENCFF098QVB	N/A
ChIP-seq	tim-reddy:BCL3.t3	ENCSR473CRE	GSE91270	tim-reddy:BCL3.t3_rep2_chip_seq_bigWig	ENCFF228NQL	N/A
ChIP-seq	tim-reddy:BCL3.t3	ENCSR473CRE	GSE91270	tim-reddy:BCL3.t3_rep2_chip_seq_fastq	ENCFF887JCO	SRR5092929
ChIP-seq	tim-reddy:BCL3.t3	ENCSR473CRE	GSE91270	tim-reddy:BCL3.t3_rep2_chip_seq_narrowPeak	ENCFF107RBG	N/A
ChIP-seq	tim-reddy:BCL3.t4	ENCSR446SPT	GSE91264	tim-reddy:BCL3.t4_rep1_chip_seq_bam	ENCFF802OZZ	N/A
ChIP-seq	tim-reddy:BCL3.t4	ENCSR446SPT	GSE91264	tim-reddy:BCL3.t4_rep1_chip_seq_bigWig	ENCFF293BWM	N/A
ChIP-seq	tim-reddy:BCL3.t4	ENCSR446SPT	GSE91264	tim-reddy:BCL3.t4_rep1_chip_seq_fastq	ENCFF705LLQ	SRR5092923
ChIP-seq	tim-reddy:BCL3.t4	ENCSR446SPT	GSE91264	tim-reddy:BCL3.t4_rep1_chip_seq_narrowPeak	ENCFF419XWL	N/A
ChIP-seq	tim-reddy:BCL3.t4	ENCSR446SPT	GSE91264	tim-reddy:BCL3.t4_rep2_chip_seq_bam	ENCFF423VZE	N/A
ChIP-seq	tim-reddy:BCL3.t4	ENCSR446SPT	GSE91264	tim-reddy:BCL3.t4_rep2_chip_seq_bigWig	ENCFF962AGY	N/A
ChIP-seq	tim-reddy:BCL3.t4	ENCSR446SPT	GSE91264	tim-reddy:BCL3.t4_rep2_chip_seq_fastq	ENCFF376HFJ	SRR5092924
ChIP-seq	tim-reddy:BCL3.t4	ENCSR446SPT	GSE91264	tim-reddy:BCL3.t4_rep2_chip_seq_narrowPeak	ENCFF059UEQ	N/A
ChIP-seq	tim-reddy:BCL3.t5	ENCSR948JXU	GSE91362	tim-reddy:BCL3.t5_rep1_chip_seq_bam	ENCFF470BPC	N/A
ChIP-seq	tim-reddy:BCL3.t5	ENCSR948JXU	GSE91362	tim-reddy:BCL3.t5_rep1_chip_seq_bigWig	ENCFF096QYU	N/A
ChIP-seq	tim-reddy:BCL3.t5	ENCSR948JXU	GSE91362	tim-reddy:BCL3.t5_rep1_chip_seq_fastq	ENCFF216JQO	SRR5093202
ChIP-seq	tim-reddy:BCL3.t5	ENCSR948JXU	GSE91362	tim-reddy:BCL3.t5_rep1_chip_seq_narrowPeak	ENCFF998RVD	N/A
ChIP-seq	tim-reddy:BCL3.t5	ENCSR948JXU	GSE91362	tim-reddy:BCL3.t5_rep2_chip_seq_bam	ENCFF565OYH	N/A
ChIP-seq	tim-reddy:BCL3.t5	ENCSR948JXU	GSE91362	tim-reddy:BCL3.t5_rep2_chip_seq_bigWig	ENCFF657ONF	N/A
ChIP-seq	tim-reddy:BCL3.t5	ENCSR948JXU	GSE91362	tim-reddy:BCL3.t5_rep2_chip_seq_fastq	ENCFF168TKE	SRR5093204
ChIP-seq	tim-reddy:BCL3.t5	ENCSR948JXU	GSE91362	tim-reddy:BCL3.t5_rep2_chip_seq_narrowPeak	ENCFF292CRN	N/A
ChIP-seq	tim-reddy:BCL3.t5	ENCSR948JXU	GSE91362	tim-reddy:BCL3.t5_rep3_chip_seq_bam	ENCFF588IJM	N/A
ChIP-seq	tim-reddy:BCL3.t5	ENCSR948JXU	GSE91362	tim-reddy:BCL3.t5_rep3_chip_seq_bigWig	ENCFF872TCV	N/A
ChIP-seq	tim-reddy:BCL3.t5	ENCSR948JXU	GSE91362	tim-reddy:BCL3.t5_rep3_chip_seq_fastq	ENCFF185NUU	SRR5093203
ChIP-seq	tim-reddy:BCL3.t5	ENCSR948JXU	GSE91362	tim-reddy:BCL3.t5_rep3_chip_seq_narrowPeak	ENCFF268ELB	N/A
ChIP-seq	tim-reddy:BCL3.t6	ENCSR186IQL	GSE91216	tim-reddy:BCL3.t6_rep1_chip_seq_bam	ENCFF603YPT	N/A
ChIP-seq	tim-reddy:BCL3.t6	ENCSR186IQL	GSE91216	tim-reddy:BCL3.t6_rep1_chip_seq_bigWig	ENCFF513UFK	N/A
ChIP-seq	tim-reddy:BCL3.t6	ENCSR186IQL	GSE91216	tim-reddy:BCL3.t6_rep1_chip_seq_fastq	ENCFF436EYQ	SRR5093330
ChIP-seq	tim-reddy:BCL3.t6	ENCSR186IQL	GSE91216	tim-reddy:BCL3.t6_rep1_chip_seq_narrowPeak	ENCFF870UFX	N/A
ChIP-seq	tim-reddy:BCL3.t6	ENCSR186IQL	GSE91216	tim-reddy:BCL3.t6_rep2_chip_seq_bam	ENCFF735BIN	N/A
ChIP-seq	tim-reddy:BCL3.t6	ENCSR186IQL	GSE91216	tim-reddy:BCL3.t6_rep2_chip_seq_bigWig	ENCFF463KUF	N/A
ChIP-seq	tim-reddy:BCL3.t6	ENCSR186IQL	GSE91216	tim-reddy:BCL3.t6_rep2_chip_seq_fastq	ENCFF640TGQ	SRR5093329
ChIP-seq	tim-reddy:BCL3.t6	ENCSR186IQL	GSE91216	tim-reddy:BCL3.t6_rep2_chip_seq_narrowPeak	ENCFF008QIQ	N/A
ChIP-seq	tim-reddy:BCL3.t6	ENCSR186IQL	GSE91216	tim-reddy:BCL3.t6_rep3_chip_seq_bam	ENCFF702KQR	N/A
ChIP-seq	tim-reddy:BCL3.t6	ENCSR186IQL	GSE91216	tim-reddy:BCL3.t6_rep3_chip_seq_bigWig	ENCFF069QVJ	N/A
ChIP-seq	tim-reddy:BCL3.t6	ENCSR186IQL	GSE91216	tim-reddy:BCL3.t6_rep3_chip_seq_fastq	ENCFF035EJZ	SRR5093331
ChIP-seq	tim-reddy:BCL3.t6	ENCSR186IQL	GSE91216	tim-reddy:BCL3.t6_rep3_chip_seq_narrowPeak	ENCFF148KIX	N/A
ChIP-seq	tim-reddy:BCL3.t7	ENCSR555AYD	GSE91287	tim-reddy:BCL3.t7_rep1_chip_seq_bam	ENCFF745QKC	N/A
ChIP-seq	tim-reddy:BCL3.t7	ENCSR555AYD	GSE91287	tim-reddy:BCL3.t7_rep1_chip_seq_bigWig	ENCFF672GCF	N/A
ChIP-seq	tim-reddy:BCL3.t7	ENCSR555AYD	GSE91287	tim-reddy:BCL3.t7_rep1_chip_seq_fastq	ENCFF159QUQ	SRR5092979
ChIP-seq	tim-reddy:BCL3.t7	ENCSR555AYD	GSE91287	tim-reddy:BCL3.t7_rep1_chip_seq_narrowPeak	ENCFF790HAJ	N/A
ChIP-seq	tim-reddy:BCL3.t7	ENCSR555AYD	GSE91287	tim-reddy:BCL3.t7_rep2_chip_seq_bam	ENCFF437SJH	N/A
ChIP-seq	tim-reddy:BCL3.t7	ENCSR555AYD	GSE91287	tim-reddy:BCL3.t7_rep2_chip_seq_bigWig	ENCFF657JIW	N/A
ChIP-seq	tim-reddy:BCL3.t7	ENCSR555AYD	GSE91287	tim-reddy:BCL3.t7_rep2_chip_seq_fastq	ENCFF125WOE	SRR5092981
ChIP-seq	tim-reddy:BCL3.t7	ENCSR555AYD	GSE91287	tim-reddy:BCL3.t7_rep2_chip_seq_narrowPeak	ENCFF263VHQ	N/A
ChIP-seq	tim-reddy:BCL3.t7	ENCSR555AYD	GSE91287	tim-reddy:BCL3.t7_rep3_chip_seq_bam	ENCFF603GCG	N/A
ChIP-seq	tim-reddy:BCL3.t7	ENCSR555AYD	GSE91287	tim-reddy:BCL3.t7_rep3_chip_seq_bigWig	ENCFF684OIF	N/A
ChIP-seq	tim-reddy:BCL3.t7	ENCSR555AYD	GSE91287	tim-reddy:BCL3.t7_rep3_chip_seq_fastq	ENCFF382UXO	SRR5092980
ChIP-seq	tim-reddy:BCL3.t7	ENCSR555AYD	GSE91287	tim-reddy:BCL3.t7_rep3_chip_seq_narrowPeak	ENCFF964XGO	N/A
ChIP-seq	tim-reddy:BCL3.t8	ENCSR639KFO	GSE91307	tim-reddy:BCL3.t8_rep1_chip_seq_bam	ENCFF667HKD	N/A
ChIP-seq	tim-reddy:BCL3.t8	ENCSR639KFO	GSE91307	tim-reddy:BCL3.t8_rep1_chip_seq_bigWig	ENCFF901EZP	N/A
ChIP-seq	tim-reddy:BCL3.t8	ENCSR639KFO	GSE91307	tim-reddy:BCL3.t8_rep1_chip_seq_fastq	ENCFF358SUY	SRR5093041
ChIP-seq	tim-reddy:BCL3.t8	ENCSR639KFO	GSE91307	tim-reddy:BCL3.t8_rep1_chip_seq_narrowPeak	ENCFF345TYS	N/A
ChIP-seq	tim-reddy:BCL3.t8	ENCSR639KFO	GSE91307	tim-reddy:BCL3.t8_rep2_chip_seq_bam	ENCFF550UME	N/A
ChIP-seq	tim-reddy:BCL3.t8	ENCSR639KFO	GSE91307	tim-reddy:BCL3.t8_rep2_chip_seq_bigWig	ENCFF156EVD	N/A
ChIP-seq	tim-reddy:BCL3.t8	ENCSR639KFO	GSE91307	tim-reddy:BCL3.t8_rep2_chip_seq_fastq	ENCFF772UQP	SRR5093040
ChIP-seq	tim-reddy:BCL3.t8	ENCSR639KFO	GSE91307	tim-reddy:BCL3.t8_rep2_chip_seq_narrowPeak	ENCFF452UDM	N/A
ChIP-seq	tim-reddy:BCL3.t8	ENCSR639KFO	GSE91307	tim-reddy:BCL3.t8_rep3_chip_seq_bam	ENCFF115OOW	N/A
ChIP-seq	tim-reddy:BCL3.t8	ENCSR639KFO	GSE91307	tim-reddy:BCL3.t8_rep3_chip_seq_bigWig	ENCFF808GMV	N/A
ChIP-seq	tim-reddy:BCL3.t8	ENCSR639KFO	GSE91307	tim-reddy:BCL3.t8_rep3_chip_seq_fastq	ENCFF542NKN	SRR5093042
ChIP-seq	tim-reddy:BCL3.t8	ENCSR639KFO	GSE91307	tim-reddy:BCL3.t8_rep3_chip_seq_narrowPeak	ENCFF644OIB	N/A
ChIP-seq	tim-reddy:CEBPB.t00	ENCSR701TCU	GSE91324	tim-reddy:CEBPB.t00_rep1_chip_seq_bam	ENCFF298YJM	N/A
ChIP-seq	tim-reddy:CEBPB.t00	ENCSR701TCU	GSE91324	tim-reddy:CEBPB.t00_rep1_chip_seq_bigWig	ENCFF651YWN	N/A
ChIP-seq	tim-reddy:CEBPB.t00	ENCSR701TCU	GSE91324	tim-reddy:CEBPB.t00_rep1_chip_seq_fastq	ENCFF747LHY	SRR5093091
ChIP-seq	tim-reddy:CEBPB.t00	ENCSR701TCU	GSE91324	tim-reddy:CEBPB.t00_rep1_chip_seq_narrowPeak	ENCFF278VAE	N/A
ChIP-seq	tim-reddy:CEBPB.t00	ENCSR701TCU	GSE91324	tim-reddy:CEBPB.t00_rep2_chip_seq_bam	ENCFF352RDB	N/A
ChIP-seq	tim-reddy:CEBPB.t00	ENCSR701TCU	GSE91324	tim-reddy:CEBPB.t00_rep2_chip_seq_bigWig	ENCFF720CEX	N/A
ChIP-seq	tim-reddy:CEBPB.t00	ENCSR701TCU	GSE91324	tim-reddy:CEBPB.t00_rep2_chip_seq_fastq	ENCFF028WZY	SRR5093092
ChIP-seq	tim-reddy:CEBPB.t00	ENCSR701TCU	GSE91324	tim-reddy:CEBPB.t00_rep2_chip_seq_narrowPeak	ENCFF585VCJ	N/A
ChIP-seq	tim-reddy:CEBPB.t05	ENCSR447ZMS	GSE91265	tim-reddy:CEBPB.t05_rep1_chip_seq_bam	ENCFF478FDP	N/A
ChIP-seq	tim-reddy:CEBPB.t05	ENCSR447ZMS	GSE91265	tim-reddy:CEBPB.t05_rep1_chip_seq_bigWig	ENCFF557IBY	N/A
ChIP-seq	tim-reddy:CEBPB.t05	ENCSR447ZMS	GSE91265	tim-reddy:CEBPB.t05_rep1_chip_seq_fastq	ENCFF496UAH	SRR5092913
ChIP-seq	tim-reddy:CEBPB.t05	ENCSR447ZMS	GSE91265	tim-reddy:CEBPB.t05_rep1_chip_seq_narrowPeak	ENCFF626ORE	N/A
ChIP-seq	tim-reddy:CEBPB.t05	ENCSR447ZMS	GSE91265	tim-reddy:CEBPB.t05_rep2_chip_seq_bam	ENCFF917QHD	N/A
ChIP-seq	tim-reddy:CEBPB.t05	ENCSR447ZMS	GSE91265	tim-reddy:CEBPB.t05_rep2_chip_seq_bigWig	ENCFF982CXA	N/A
ChIP-seq	tim-reddy:CEBPB.t05	ENCSR447ZMS	GSE91265	tim-reddy:CEBPB.t05_rep2_chip_seq_fastq	ENCFF046LLR	SRR5092912
ChIP-seq	tim-reddy:CEBPB.t05	ENCSR447ZMS	GSE91265	tim-reddy:CEBPB.t05_rep2_chip_seq_narrowPeak	ENCFF472DFB	N/A
ChIP-seq	tim-reddy:CEBPB.t05	ENCSR447ZMS	GSE91265	tim-reddy:CEBPB.t05_rep3_chip_seq_bam	ENCFF693WXT	N/A
ChIP-seq	tim-reddy:CEBPB.t05	ENCSR447ZMS	GSE91265	tim-reddy:CEBPB.t05_rep3_chip_seq_bigWig	ENCFF363OLS	N/A
ChIP-seq	tim-reddy:CEBPB.t05	ENCSR447ZMS	GSE91265	tim-reddy:CEBPB.t05_rep3_chip_seq_fastq	ENCFF859YGK	SRR5092911
ChIP-seq	tim-reddy:CEBPB.t05	ENCSR447ZMS	GSE91265	tim-reddy:CEBPB.t05_rep3_chip_seq_narrowPeak	ENCFF436JPO	N/A
ChIP-seq	tim-reddy:CEBPB.t10	ENCSR190VMK	GSE91217	tim-reddy:CEBPB.t10_rep1_chip_seq_bam	ENCFF877KKW	N/A
ChIP-seq	tim-reddy:CEBPB.t10	ENCSR190VMK	GSE91217	tim-reddy:CEBPB.t10_rep1_chip_seq_bigWig	ENCFF715MDS	N/A
ChIP-seq	tim-reddy:CEBPB.t10	ENCSR190VMK	GSE91217	tim-reddy:CEBPB.t10_rep1_chip_seq_fastq	ENCFF764HLW	SRR5093332
ChIP-seq	tim-reddy:CEBPB.t10	ENCSR190VMK	GSE91217	tim-reddy:CEBPB.t10_rep1_chip_seq_narrowPeak	ENCFF044KXC	N/A
ChIP-seq	tim-reddy:CEBPB.t10	ENCSR190VMK	GSE91217	tim-reddy:CEBPB.t10_rep2_chip_seq_bam	ENCFF192KQH	N/A
ChIP-seq	tim-reddy:CEBPB.t10	ENCSR190VMK	GSE91217	tim-reddy:CEBPB.t10_rep2_chip_seq_bigWig	ENCFF770TXD	N/A
ChIP-seq	tim-reddy:CEBPB.t10	ENCSR190VMK	GSE91217	tim-reddy:CEBPB.t10_rep2_chip_seq_fastq	ENCFF616TDE	SRR5093333
ChIP-seq	tim-reddy:CEBPB.t10	ENCSR190VMK	GSE91217	tim-reddy:CEBPB.t10_rep2_chip_seq_narrowPeak	ENCFF023RZH	N/A
ChIP-seq	tim-reddy:CEBPB.t10	ENCSR190VMK	GSE91217	tim-reddy:CEBPB.t10_rep3_chip_seq_bam	ENCFF887WWV	N/A
ChIP-seq	tim-reddy:CEBPB.t10	ENCSR190VMK	GSE91217	tim-reddy:CEBPB.t10_rep3_chip_seq_bigWig	ENCFF920KSL	N/A
ChIP-seq	tim-reddy:CEBPB.t10	ENCSR190VMK	GSE91217	tim-reddy:CEBPB.t10_rep3_chip_seq_fastq	ENCFF956DLX	SRR5093334
ChIP-seq	tim-reddy:CEBPB.t10	ENCSR190VMK	GSE91217	tim-reddy:CEBPB.t10_rep3_chip_seq_narrowPeak	ENCFF779ZUX	N/A
ChIP-seq	tim-reddy:CEBPB.t12	ENCSR269IUA	GSE91231	tim-reddy:CEBPB.t12_rep1_chip_seq_bam	ENCFF227UVU	N/A
ChIP-seq	tim-reddy:CEBPB.t12	ENCSR269IUA	GSE91231	tim-reddy:CEBPB.t12_rep1_chip_seq_bigWig	ENCFF721FJR	N/A
ChIP-seq	tim-reddy:CEBPB.t12	ENCSR269IUA	GSE91231	tim-reddy:CEBPB.t12_rep1_chip_seq_fastq	ENCFF165VMM	SRR5093375
ChIP-seq	tim-reddy:CEBPB.t12	ENCSR269IUA	GSE91231	tim-reddy:CEBPB.t12_rep1_chip_seq_narrowPeak	ENCFF858QIP	N/A
ChIP-seq	tim-reddy:CEBPB.t12	ENCSR269IUA	GSE91231	tim-reddy:CEBPB.t12_rep2_chip_seq_bam	ENCFF220BAG	N/A
ChIP-seq	tim-reddy:CEBPB.t12	ENCSR269IUA	GSE91231	tim-reddy:CEBPB.t12_rep2_chip_seq_bigWig	ENCFF582NAK	N/A
ChIP-seq	tim-reddy:CEBPB.t12	ENCSR269IUA	GSE91231	tim-reddy:CEBPB.t12_rep2_chip_seq_fastq	ENCFF823RDW	SRR5093374
ChIP-seq	tim-reddy:CEBPB.t12	ENCSR269IUA	GSE91231	tim-reddy:CEBPB.t12_rep2_chip_seq_narrowPeak	ENCFF507KCU	N/A
ChIP-seq	tim-reddy:CEBPB.t12	ENCSR269IUA	GSE91231	tim-reddy:CEBPB.t12_rep3_chip_seq_bam	ENCFF492DBK	N/A
ChIP-seq	tim-reddy:CEBPB.t12	ENCSR269IUA	GSE91231	tim-reddy:CEBPB.t12_rep3_chip_seq_bigWig	ENCFF741DIK	N/A
ChIP-seq	tim-reddy:CEBPB.t12	ENCSR269IUA	GSE91231	tim-reddy:CEBPB.t12_rep3_chip_seq_fastq	ENCFF915PSA	SRR5093373
ChIP-seq	tim-reddy:CEBPB.t12	ENCSR269IUA	GSE91231	tim-reddy:CEBPB.t12_rep3_chip_seq_narrowPeak	ENCFF739NKN	N/A
ChIP-seq	tim-reddy:CEBPB.t1	ENCSR299ILN	GSE91238	tim-reddy:CEBPB.t1_rep1_chip_seq_bam	ENCFF853YQP	N/A
ChIP-seq	tim-reddy:CEBPB.t1	ENCSR299ILN	GSE91238	tim-reddy:CEBPB.t1_rep1_chip_seq_bigWig	ENCFF425JGW	N/A
ChIP-seq	tim-reddy:CEBPB.t1	ENCSR299ILN	GSE91238	tim-reddy:CEBPB.t1_rep1_chip_seq_fastq	ENCFF750EOP	SRR5093394
ChIP-seq	tim-reddy:CEBPB.t1	ENCSR299ILN	GSE91238	tim-reddy:CEBPB.t1_rep1_chip_seq_narrowPeak	ENCFF944WFX	N/A
ChIP-seq	tim-reddy:CEBPB.t1	ENCSR299ILN	GSE91238	tim-reddy:CEBPB.t1_rep2_chip_seq_bam	ENCFF649ILS	N/A
ChIP-seq	tim-reddy:CEBPB.t1	ENCSR299ILN	GSE91238	tim-reddy:CEBPB.t1_rep2_chip_seq_bigWig	ENCFF938QPB	N/A
ChIP-seq	tim-reddy:CEBPB.t1	ENCSR299ILN	GSE91238	tim-reddy:CEBPB.t1_rep2_chip_seq_fastq	ENCFF670SMU	SRR5093395
ChIP-seq	tim-reddy:CEBPB.t1	ENCSR299ILN	GSE91238	tim-reddy:CEBPB.t1_rep2_chip_seq_narrowPeak	ENCFF375GQZ	N/A
ChIP-seq	tim-reddy:CEBPB.t1	ENCSR299ILN	GSE91238	tim-reddy:CEBPB.t1_rep3_chip_seq_bam	ENCFF060FCQ	N/A
ChIP-seq	tim-reddy:CEBPB.t1	ENCSR299ILN	GSE91238	tim-reddy:CEBPB.t1_rep3_chip_seq_bigWig	ENCFF684UTY	N/A
ChIP-seq	tim-reddy:CEBPB.t1	ENCSR299ILN	GSE91238	tim-reddy:CEBPB.t1_rep3_chip_seq_fastq	ENCFF264TCW	SRR5093396
ChIP-seq	tim-reddy:CEBPB.t1	ENCSR299ILN	GSE91238	tim-reddy:CEBPB.t1_rep3_chip_seq_narrowPeak	ENCFF655AWQ	N/A
ChIP-seq	tim-reddy:CEBPB.t2	ENCSR182OZC	GSE91215	tim-reddy:CEBPB.t2_rep1_chip_seq_bam	ENCFF217RBI	N/A
ChIP-seq	tim-reddy:CEBPB.t2	ENCSR182OZC	GSE91215	tim-reddy:CEBPB.t2_rep1_chip_seq_bigWig	ENCFF604PVY	N/A
ChIP-seq	tim-reddy:CEBPB.t2	ENCSR182OZC	GSE91215	tim-reddy:CEBPB.t2_rep1_chip_seq_fastq	ENCFF856ROJ	SRR5093325
ChIP-seq	tim-reddy:CEBPB.t2	ENCSR182OZC	GSE91215	tim-reddy:CEBPB.t2_rep1_chip_seq_narrowPeak	ENCFF786OYA	N/A
ChIP-seq	tim-reddy:CEBPB.t2	ENCSR182OZC	GSE91215	tim-reddy:CEBPB.t2_rep3_chip_seq_bam	ENCFF791DRP	N/A
ChIP-seq	tim-reddy:CEBPB.t2	ENCSR182OZC	GSE91215	tim-reddy:CEBPB.t2_rep3_chip_seq_bigWig	ENCFF543ZGP	N/A
ChIP-seq	tim-reddy:CEBPB.t2	ENCSR182OZC	GSE91215	tim-reddy:CEBPB.t2_rep3_chip_seq_fastq	ENCFF140KTN	SRR5093324
ChIP-seq	tim-reddy:CEBPB.t2	ENCSR182OZC	GSE91215	tim-reddy:CEBPB.t2_rep3_chip_seq_narrowPeak	ENCFF851OFV	N/A
ChIP-seq	tim-reddy:CEBPB.t3	ENCSR216GEB	GSE91221	tim-reddy:CEBPB.t3_rep1_chip_seq_bam	ENCFF311IDK	N/A
ChIP-seq	tim-reddy:CEBPB.t3	ENCSR216GEB	GSE91221	tim-reddy:CEBPB.t3_rep1_chip_seq_bigWig	ENCFF248VFU	N/A
ChIP-seq	tim-reddy:CEBPB.t3	ENCSR216GEB	GSE91221	tim-reddy:CEBPB.t3_rep1_chip_seq_fastq	ENCFF483KFJ	SRR5093346
ChIP-seq	tim-reddy:CEBPB.t3	ENCSR216GEB	GSE91221	tim-reddy:CEBPB.t3_rep1_chip_seq_narrowPeak	ENCFF606LFI	N/A
ChIP-seq	tim-reddy:CEBPB.t3	ENCSR216GEB	GSE91221	tim-reddy:CEBPB.t3_rep2_chip_seq_bam	ENCFF757MNE	N/A
ChIP-seq	tim-reddy:CEBPB.t3	ENCSR216GEB	GSE91221	tim-reddy:CEBPB.t3_rep2_chip_seq_bigWig	ENCFF285DXO	N/A
ChIP-seq	tim-reddy:CEBPB.t3	ENCSR216GEB	GSE91221	tim-reddy:CEBPB.t3_rep2_chip_seq_fastq	ENCFF335BUI	SRR5093345
ChIP-seq	tim-reddy:CEBPB.t3	ENCSR216GEB	GSE91221	tim-reddy:CEBPB.t3_rep2_chip_seq_narrowPeak	ENCFF152LKE	N/A
ChIP-seq	tim-reddy:CEBPB.t4	ENCSR606ZTC	GSE91297	tim-reddy:CEBPB.t4_rep1_chip_seq_bam	ENCFF347MNU	N/A
ChIP-seq	tim-reddy:CEBPB.t4	ENCSR606ZTC	GSE91297	tim-reddy:CEBPB.t4_rep1_chip_seq_bigWig	ENCFF548BAM	N/A
ChIP-seq	tim-reddy:CEBPB.t4	ENCSR606ZTC	GSE91297	tim-reddy:CEBPB.t4_rep1_chip_seq_fastq	ENCFF921TZP	SRR5093019
ChIP-seq	tim-reddy:CEBPB.t4	ENCSR606ZTC	GSE91297	tim-reddy:CEBPB.t4_rep1_chip_seq_narrowPeak	ENCFF558LHA	N/A
ChIP-seq	tim-reddy:CEBPB.t4	ENCSR606ZTC	GSE91297	tim-reddy:CEBPB.t4_rep2_chip_seq_bam	ENCFF417GPF	N/A
ChIP-seq	tim-reddy:CEBPB.t4	ENCSR606ZTC	GSE91297	tim-reddy:CEBPB.t4_rep2_chip_seq_bigWig	ENCFF284MVL	N/A
ChIP-seq	tim-reddy:CEBPB.t4	ENCSR606ZTC	GSE91297	tim-reddy:CEBPB.t4_rep2_chip_seq_fastq	ENCFF029ENP	SRR5093020
ChIP-seq	tim-reddy:CEBPB.t4	ENCSR606ZTC	GSE91297	tim-reddy:CEBPB.t4_rep2_chip_seq_narrowPeak	ENCFF581CCI	N/A
ChIP-seq	tim-reddy:CEBPB.t5	ENCSR752AQK	GSE91330	tim-reddy:CEBPB.t5_rep1_chip_seq_bam	ENCFF804HGF	N/A
ChIP-seq	tim-reddy:CEBPB.t5	ENCSR752AQK	GSE91330	tim-reddy:CEBPB.t5_rep1_chip_seq_bigWig	ENCFF943HWU	N/A
ChIP-seq	tim-reddy:CEBPB.t5	ENCSR752AQK	GSE91330	tim-reddy:CEBPB.t5_rep1_chip_seq_fastq	ENCFF596HNX	SRR5093109
ChIP-seq	tim-reddy:CEBPB.t5	ENCSR752AQK	GSE91330	tim-reddy:CEBPB.t5_rep1_chip_seq_narrowPeak	ENCFF259GUE	N/A
ChIP-seq	tim-reddy:CEBPB.t5	ENCSR752AQK	GSE91330	tim-reddy:CEBPB.t5_rep2_chip_seq_bam	ENCFF490BFJ	N/A
ChIP-seq	tim-reddy:CEBPB.t5	ENCSR752AQK	GSE91330	tim-reddy:CEBPB.t5_rep2_chip_seq_bigWig	ENCFF443AQV	N/A
ChIP-seq	tim-reddy:CEBPB.t5	ENCSR752AQK	GSE91330	tim-reddy:CEBPB.t5_rep2_chip_seq_fastq	ENCFF047MBY	SRR5093110
ChIP-seq	tim-reddy:CEBPB.t5	ENCSR752AQK	GSE91330	tim-reddy:CEBPB.t5_rep2_chip_seq_narrowPeak	ENCFF386XKU	N/A
ChIP-seq	tim-reddy:CEBPB.t5	ENCSR752AQK	GSE91330	tim-reddy:CEBPB.t5_rep3_chip_seq_bam	ENCFF217WJF	N/A
ChIP-seq	tim-reddy:CEBPB.t5	ENCSR752AQK	GSE91330	tim-reddy:CEBPB.t5_rep3_chip_seq_bigWig	ENCFF100PZC	N/A
ChIP-seq	tim-reddy:CEBPB.t5	ENCSR752AQK	GSE91330	tim-reddy:CEBPB.t5_rep3_chip_seq_fastq	ENCFF754BJD	SRR5093108
ChIP-seq	tim-reddy:CEBPB.t5	ENCSR752AQK	GSE91330	tim-reddy:CEBPB.t5_rep3_chip_seq_narrowPeak	ENCFF408SVY	N/A
ChIP-seq	tim-reddy:CEBPB.t6	ENCSR375BUB	GSE91252	tim-reddy:CEBPB.t6_rep2_chip_seq_bam	ENCFF073MBT	N/A
ChIP-seq	tim-reddy:CEBPB.t6	ENCSR375BUB	GSE91252	tim-reddy:CEBPB.t6_rep2_chip_seq_bigWig	ENCFF388BUZ	N/A
ChIP-seq	tim-reddy:CEBPB.t6	ENCSR375BUB	GSE91252	tim-reddy:CEBPB.t6_rep2_chip_seq_fastq	ENCFF931HIX	SRR5093439
ChIP-seq	tim-reddy:CEBPB.t6	ENCSR375BUB	GSE91252	tim-reddy:CEBPB.t6_rep2_chip_seq_narrowPeak	ENCFF048VWV	N/A
ChIP-seq	tim-reddy:CEBPB.t6	ENCSR375BUB	GSE91252	tim-reddy:CEBPB.t6_rep3_chip_seq_bam	ENCFF280ZFT	N/A
ChIP-seq	tim-reddy:CEBPB.t6	ENCSR375BUB	GSE91252	tim-reddy:CEBPB.t6_rep3_chip_seq_bigWig	ENCFF816RGS	N/A
ChIP-seq	tim-reddy:CEBPB.t6	ENCSR375BUB	GSE91252	tim-reddy:CEBPB.t6_rep3_chip_seq_fastq	ENCFF146MIV	SRR5093440
ChIP-seq	tim-reddy:CEBPB.t6	ENCSR375BUB	GSE91252	tim-reddy:CEBPB.t6_rep3_chip_seq_narrowPeak	ENCFF543ITL	N/A
ChIP-seq	tim-reddy:CEBPB.t7	ENCSR853DWE	GSE91345	tim-reddy:CEBPB.t7_rep1_chip_seq_bam	ENCFF122DAA	N/A
ChIP-seq	tim-reddy:CEBPB.t7	ENCSR853DWE	GSE91345	tim-reddy:CEBPB.t7_rep1_chip_seq_bigWig	ENCFF897HTM	N/A
ChIP-seq	tim-reddy:CEBPB.t7	ENCSR853DWE	GSE91345	tim-reddy:CEBPB.t7_rep1_chip_seq_fastq	ENCFF887KKK	SRR5093154
ChIP-seq	tim-reddy:CEBPB.t7	ENCSR853DWE	GSE91345	tim-reddy:CEBPB.t7_rep1_chip_seq_narrowPeak	ENCFF053OPX	N/A
ChIP-seq	tim-reddy:CEBPB.t7	ENCSR853DWE	GSE91345	tim-reddy:CEBPB.t7_rep2_chip_seq_bam	ENCFF476XZD	N/A
ChIP-seq	tim-reddy:CEBPB.t7	ENCSR853DWE	GSE91345	tim-reddy:CEBPB.t7_rep2_chip_seq_bigWig	ENCFF394LVA	N/A
ChIP-seq	tim-reddy:CEBPB.t7	ENCSR853DWE	GSE91345	tim-reddy:CEBPB.t7_rep2_chip_seq_fastq	ENCFF152MAA	SRR5093153
ChIP-seq	tim-reddy:CEBPB.t7	ENCSR853DWE	GSE91345	tim-reddy:CEBPB.t7_rep2_chip_seq_narrowPeak	ENCFF842NJN	N/A
ChIP-seq	tim-reddy:CEBPB.t7	ENCSR853DWE	GSE91345	tim-reddy:CEBPB.t7_rep3_chip_seq_bam	ENCFF639GDS	N/A
ChIP-seq	tim-reddy:CEBPB.t7	ENCSR853DWE	GSE91345	tim-reddy:CEBPB.t7_rep3_chip_seq_bigWig	ENCFF705DAP	N/A
ChIP-seq	tim-reddy:CEBPB.t7	ENCSR853DWE	GSE91345	tim-reddy:CEBPB.t7_rep3_chip_seq_fastq	ENCFF487ZJN	SRR5093152
ChIP-seq	tim-reddy:CEBPB.t7	ENCSR853DWE	GSE91345	tim-reddy:CEBPB.t7_rep3_chip_seq_narrowPeak	ENCFF784LWV	N/A
ChIP-seq	tim-reddy:CEBPB.t8	ENCSR474DCX	GSE91271	tim-reddy:CEBPB.t8_rep1_chip_seq_bam	ENCFF263CFP	N/A
ChIP-seq	tim-reddy:CEBPB.t8	ENCSR474DCX	GSE91271	tim-reddy:CEBPB.t8_rep1_chip_seq_bigWig	ENCFF687GIJ	N/A
ChIP-seq	tim-reddy:CEBPB.t8	ENCSR474DCX	GSE91271	tim-reddy:CEBPB.t8_rep1_chip_seq_fastq	ENCFF730KTQ	SRR5092932
ChIP-seq	tim-reddy:CEBPB.t8	ENCSR474DCX	GSE91271	tim-reddy:CEBPB.t8_rep1_chip_seq_narrowPeak	ENCFF694IKT	N/A
ChIP-seq	tim-reddy:CEBPB.t8	ENCSR474DCX	GSE91271	tim-reddy:CEBPB.t8_rep2_chip_seq_bam	ENCFF745OUL	N/A
ChIP-seq	tim-reddy:CEBPB.t8	ENCSR474DCX	GSE91271	tim-reddy:CEBPB.t8_rep2_chip_seq_bigWig	ENCFF957FDT	N/A
ChIP-seq	tim-reddy:CEBPB.t8	ENCSR474DCX	GSE91271	tim-reddy:CEBPB.t8_rep2_chip_seq_fastq	ENCFF604RPB	SRR5092930
ChIP-seq	tim-reddy:CEBPB.t8	ENCSR474DCX	GSE91271	tim-reddy:CEBPB.t8_rep2_chip_seq_narrowPeak	ENCFF389AGF	N/A
ChIP-seq	tim-reddy:CEBPB.t8	ENCSR474DCX	GSE91271	tim-reddy:CEBPB.t8_rep3_chip_seq_bam	ENCFF478BBB	N/A
ChIP-seq	tim-reddy:CEBPB.t8	ENCSR474DCX	GSE91271	tim-reddy:CEBPB.t8_rep3_chip_seq_bigWig	ENCFF031NMF	N/A
ChIP-seq	tim-reddy:CEBPB.t8	ENCSR474DCX	GSE91271	tim-reddy:CEBPB.t8_rep3_chip_seq_fastq	ENCFF024QAO	SRR5092931
ChIP-seq	tim-reddy:CEBPB.t8	ENCSR474DCX	GSE91271	tim-reddy:CEBPB.t8_rep3_chip_seq_narrowPeak	ENCFF176AUI	N/A
ChIP-seq	tim-reddy:cJun.t00	ENCSR048CVK	GSE92783	tim-reddy:cJun.t00_rep2_chip_seq_bam	ENCFF255YNB	N/A
ChIP-seq	tim-reddy:cJun.t00	ENCSR048CVK	GSE92783	tim-reddy:cJun.t00_rep2_chip_seq_bigWig	ENCFF036FUS	N/A
ChIP-seq	tim-reddy:cJun.t00	ENCSR048CVK	GSE92783	tim-reddy:cJun.t00_rep2_chip_seq_fastq	ENCFF189BHS	SRR5129537
ChIP-seq	tim-reddy:cJun.t00	ENCSR048CVK	GSE92783	tim-reddy:cJun.t00_rep2_chip_seq_narrowPeak	ENCFF202DUT	N/A
ChIP-seq	tim-reddy:cJun.t00	ENCSR048CVK	GSE92783	tim-reddy:cJun.t00_rep3_chip_seq_bam	ENCFF105OTG	N/A
ChIP-seq	tim-reddy:cJun.t00	ENCSR048CVK	GSE92783	tim-reddy:cJun.t00_rep3_chip_seq_bigWig	ENCFF977OEH	N/A
ChIP-seq	tim-reddy:cJun.t00	ENCSR048CVK	GSE92783	tim-reddy:cJun.t00_rep3_chip_seq_fastq	ENCFF119IDQ	SRR5129538
ChIP-seq	tim-reddy:cJun.t00	ENCSR048CVK	GSE92783	tim-reddy:cJun.t00_rep3_chip_seq_narrowPeak	ENCFF064QGH	N/A
ChIP-seq	tim-reddy:cJun.t05	ENCSR761RDU	GSE92826	tim-reddy:cJun.t05_rep2_chip_seq_bam	ENCFF990TOU	N/A
ChIP-seq	tim-reddy:cJun.t05	ENCSR761RDU	GSE92826	tim-reddy:cJun.t05_rep2_chip_seq_bigWig	ENCFF721MIW	N/A
ChIP-seq	tim-reddy:cJun.t05	ENCSR761RDU	GSE92826	tim-reddy:cJun.t05_rep2_chip_seq_fastq	ENCFF850FCZ	SRR5129652
ChIP-seq	tim-reddy:cJun.t05	ENCSR761RDU	GSE92826	tim-reddy:cJun.t05_rep2_chip_seq_narrowPeak	ENCFF510XXN	N/A
ChIP-seq	tim-reddy:cJun.t05	ENCSR761RDU	GSE92826	tim-reddy:cJun.t05_rep3_chip_seq_bam	ENCFF867PZN	N/A
ChIP-seq	tim-reddy:cJun.t05	ENCSR761RDU	GSE92826	tim-reddy:cJun.t05_rep3_chip_seq_bigWig	ENCFF794IVP	N/A
ChIP-seq	tim-reddy:cJun.t05	ENCSR761RDU	GSE92826	tim-reddy:cJun.t05_rep3_chip_seq_fastq	ENCFF441RBV	SRR5129653
ChIP-seq	tim-reddy:cJun.t05	ENCSR761RDU	GSE92826	tim-reddy:cJun.t05_rep3_chip_seq_narrowPeak	ENCFF790EPJ	N/A
ChIP-seq	tim-reddy:cJun.t10	ENCSR090RGB	GSE92785	tim-reddy:cJun.t10_rep1_chip_seq_bam	ENCFF788UEX	N/A
ChIP-seq	tim-reddy:cJun.t10	ENCSR090RGB	GSE92785	tim-reddy:cJun.t10_rep1_chip_seq_bigWig	ENCFF997OVI	N/A
ChIP-seq	tim-reddy:cJun.t10	ENCSR090RGB	GSE92785	tim-reddy:cJun.t10_rep1_chip_seq_fastq	ENCFF482ITW	SRR5129543
ChIP-seq	tim-reddy:cJun.t10	ENCSR090RGB	GSE92785	tim-reddy:cJun.t10_rep1_chip_seq_narrowPeak	ENCFF577ZOK	N/A
ChIP-seq	tim-reddy:cJun.t10	ENCSR090RGB	GSE92785	tim-reddy:cJun.t10_rep2_chip_seq_bam	ENCFF866SWX	N/A
ChIP-seq	tim-reddy:cJun.t10	ENCSR090RGB	GSE92785	tim-reddy:cJun.t10_rep2_chip_seq_bigWig	ENCFF733QZH	N/A
ChIP-seq	tim-reddy:cJun.t10	ENCSR090RGB	GSE92785	tim-reddy:cJun.t10_rep2_chip_seq_fastq	ENCFF984CIU	SRR5129544
ChIP-seq	tim-reddy:cJun.t10	ENCSR090RGB	GSE92785	tim-reddy:cJun.t10_rep2_chip_seq_narrowPeak	ENCFF741NHS	N/A
ChIP-seq	tim-reddy:cJun.t10	ENCSR090RGB	GSE92785	tim-reddy:cJun.t10_rep3_chip_seq_bam	ENCFF795OSF	N/A
ChIP-seq	tim-reddy:cJun.t10	ENCSR090RGB	GSE92785	tim-reddy:cJun.t10_rep3_chip_seq_bigWig	ENCFF763GFC	N/A
ChIP-seq	tim-reddy:cJun.t10	ENCSR090RGB	GSE92785	tim-reddy:cJun.t10_rep3_chip_seq_fastq	ENCFF857OSU	SRR5129542
ChIP-seq	tim-reddy:cJun.t10	ENCSR090RGB	GSE92785	tim-reddy:cJun.t10_rep3_chip_seq_narrowPeak	ENCFF660QHH	N/A
ChIP-seq	tim-reddy:cJun.t12	ENCSR664ZHF	GSE92820	tim-reddy:cJun.t12_rep1_chip_seq_bam	ENCFF010YMM	N/A
ChIP-seq	tim-reddy:cJun.t12	ENCSR664ZHF	GSE92820	tim-reddy:cJun.t12_rep1_chip_seq_bigWig	ENCFF121PTN	N/A
ChIP-seq	tim-reddy:cJun.t12	ENCSR664ZHF	GSE92820	tim-reddy:cJun.t12_rep1_chip_seq_fastq	ENCFF190TJI	SRR5129657
ChIP-seq	tim-reddy:cJun.t12	ENCSR664ZHF	GSE92820	tim-reddy:cJun.t12_rep1_chip_seq_narrowPeak	ENCFF187MSF	N/A
ChIP-seq	tim-reddy:cJun.t12	ENCSR664ZHF	GSE92820	tim-reddy:cJun.t12_rep2_chip_seq_bam	ENCFF979HWA	N/A
ChIP-seq	tim-reddy:cJun.t12	ENCSR664ZHF	GSE92820	tim-reddy:cJun.t12_rep2_chip_seq_bigWig	ENCFF299IVF	N/A
ChIP-seq	tim-reddy:cJun.t12	ENCSR664ZHF	GSE92820	tim-reddy:cJun.t12_rep2_chip_seq_fastq	ENCFF857NXW	SRR5129659
ChIP-seq	tim-reddy:cJun.t12	ENCSR664ZHF	GSE92820	tim-reddy:cJun.t12_rep2_chip_seq_narrowPeak	ENCFF106DDY	N/A
ChIP-seq	tim-reddy:cJun.t12	ENCSR664ZHF	GSE92820	tim-reddy:cJun.t12_rep3_chip_seq_bam	ENCFF151HUH	N/A
ChIP-seq	tim-reddy:cJun.t12	ENCSR664ZHF	GSE92820	tim-reddy:cJun.t12_rep3_chip_seq_bigWig	ENCFF078KGS	N/A
ChIP-seq	tim-reddy:cJun.t12	ENCSR664ZHF	GSE92820	tim-reddy:cJun.t12_rep3_chip_seq_fastq	ENCFF488ZQP	SRR5129658
ChIP-seq	tim-reddy:cJun.t12	ENCSR664ZHF	GSE92820	tim-reddy:cJun.t12_rep3_chip_seq_narrowPeak	ENCFF219YOR	N/A
ChIP-seq	tim-reddy:cJun.t1	ENCSR991VVW	GSE92834	tim-reddy:cJun.t1_rep2_chip_seq_bam	ENCFF476XBN	N/A
ChIP-seq	tim-reddy:cJun.t1	ENCSR991VVW	GSE92834	tim-reddy:cJun.t1_rep2_chip_seq_bigWig	ENCFF167PZR	N/A
ChIP-seq	tim-reddy:cJun.t1	ENCSR991VVW	GSE92834	tim-reddy:cJun.t1_rep2_chip_seq_fastq	ENCFF427FQF	SRR5129674
ChIP-seq	tim-reddy:cJun.t1	ENCSR991VVW	GSE92834	tim-reddy:cJun.t1_rep2_chip_seq_narrowPeak	ENCFF524BFG	N/A
ChIP-seq	tim-reddy:cJun.t1	ENCSR991VVW	GSE92834	tim-reddy:cJun.t1_rep3_chip_seq_bam	ENCFF761UEZ	N/A
ChIP-seq	tim-reddy:cJun.t1	ENCSR991VVW	GSE92834	tim-reddy:cJun.t1_rep3_chip_seq_bigWig	ENCFF726MVB	N/A
ChIP-seq	tim-reddy:cJun.t1	ENCSR991VVW	GSE92834	tim-reddy:cJun.t1_rep3_chip_seq_fastq	ENCFF610WGQ	SRR5129675
ChIP-seq	tim-reddy:cJun.t1	ENCSR991VVW	GSE92834	tim-reddy:cJun.t1_rep3_chip_seq_narrowPeak	ENCFF105QBY	N/A
ChIP-seq	tim-reddy:cJun.t2	ENCSR793HZD	GSE92828	tim-reddy:cJun.t2_rep2_chip_seq_bam	ENCFF642SDA	N/A
ChIP-seq	tim-reddy:cJun.t2	ENCSR793HZD	GSE92828	tim-reddy:cJun.t2_rep2_chip_seq_bigWig	ENCFF890JIR	N/A
ChIP-seq	tim-reddy:cJun.t2	ENCSR793HZD	GSE92828	tim-reddy:cJun.t2_rep2_chip_seq_fastq	ENCFF456FJC	SRR5129647
ChIP-seq	tim-reddy:cJun.t2	ENCSR793HZD	GSE92828	tim-reddy:cJun.t2_rep2_chip_seq_narrowPeak	ENCFF370VBL	N/A
ChIP-seq	tim-reddy:cJun.t2	ENCSR793HZD	GSE92828	tim-reddy:cJun.t2_rep3_chip_seq_bam	ENCFF299MHQ	N/A
ChIP-seq	tim-reddy:cJun.t2	ENCSR793HZD	GSE92828	tim-reddy:cJun.t2_rep3_chip_seq_bigWig	ENCFF202QYZ	N/A
ChIP-seq	tim-reddy:cJun.t2	ENCSR793HZD	GSE92828	tim-reddy:cJun.t2_rep3_chip_seq_fastq	ENCFF743TTU	SRR5129648
ChIP-seq	tim-reddy:cJun.t2	ENCSR793HZD	GSE92828	tim-reddy:cJun.t2_rep3_chip_seq_narrowPeak	ENCFF398FIS	N/A
ChIP-seq	tim-reddy:cJun.t3	ENCSR489DIG	GSE92809	tim-reddy:cJun.t3_rep1_chip_seq_bam	ENCFF884MHV	N/A
ChIP-seq	tim-reddy:cJun.t3	ENCSR489DIG	GSE92809	tim-reddy:cJun.t3_rep1_chip_seq_bigWig	ENCFF190NEP	N/A
ChIP-seq	tim-reddy:cJun.t3	ENCSR489DIG	GSE92809	tim-reddy:cJun.t3_rep1_chip_seq_fastq	ENCFF579UWF	SRR5129581
ChIP-seq	tim-reddy:cJun.t3	ENCSR489DIG	GSE92809	tim-reddy:cJun.t3_rep1_chip_seq_narrowPeak	ENCFF564ZXK	N/A
ChIP-seq	tim-reddy:cJun.t3	ENCSR489DIG	GSE92809	tim-reddy:cJun.t3_rep2_chip_seq_bam	ENCFF061DZW	N/A
ChIP-seq	tim-reddy:cJun.t3	ENCSR489DIG	GSE92809	tim-reddy:cJun.t3_rep2_chip_seq_bigWig	ENCFF825GEP	N/A
ChIP-seq	tim-reddy:cJun.t3	ENCSR489DIG	GSE92809	tim-reddy:cJun.t3_rep2_chip_seq_fastq	ENCFF358NBO	SRR5129580
ChIP-seq	tim-reddy:cJun.t3	ENCSR489DIG	GSE92809	tim-reddy:cJun.t3_rep2_chip_seq_narrowPeak	ENCFF929RXJ	N/A
ChIP-seq	tim-reddy:cJun.t3	ENCSR489DIG	GSE92809	tim-reddy:cJun.t3_rep3_chip_seq_bam	ENCFF862NYT	N/A
ChIP-seq	tim-reddy:cJun.t3	ENCSR489DIG	GSE92809	tim-reddy:cJun.t3_rep3_chip_seq_bigWig	ENCFF964FIX	N/A
ChIP-seq	tim-reddy:cJun.t3	ENCSR489DIG	GSE92809	tim-reddy:cJun.t3_rep3_chip_seq_fastq	ENCFF493RAI	SRR5129579
ChIP-seq	tim-reddy:cJun.t3	ENCSR489DIG	GSE92809	tim-reddy:cJun.t3_rep3_chip_seq_narrowPeak	ENCFF367ILW	N/A
ChIP-seq	tim-reddy:cJun.t4	ENCSR708DGM	GSE92823	tim-reddy:cJun.t4_rep1_chip_seq_bam	ENCFF404ENE	N/A
ChIP-seq	tim-reddy:cJun.t4	ENCSR708DGM	GSE92823	tim-reddy:cJun.t4_rep1_chip_seq_bigWig	ENCFF426LCN	N/A
ChIP-seq	tim-reddy:cJun.t4	ENCSR708DGM	GSE92823	tim-reddy:cJun.t4_rep1_chip_seq_fastq	ENCFF240BHT	SRR5129645
ChIP-seq	tim-reddy:cJun.t4	ENCSR708DGM	GSE92823	tim-reddy:cJun.t4_rep1_chip_seq_narrowPeak	ENCFF806FAV	N/A
ChIP-seq	tim-reddy:cJun.t4	ENCSR708DGM	GSE92823	tim-reddy:cJun.t4_rep2_chip_seq_bam	ENCFF630WBP	N/A
ChIP-seq	tim-reddy:cJun.t4	ENCSR708DGM	GSE92823	tim-reddy:cJun.t4_rep2_chip_seq_bigWig	ENCFF486OQB	N/A
ChIP-seq	tim-reddy:cJun.t4	ENCSR708DGM	GSE92823	tim-reddy:cJun.t4_rep2_chip_seq_fastq	ENCFF040MIZ	SRR5129646
ChIP-seq	tim-reddy:cJun.t4	ENCSR708DGM	GSE92823	tim-reddy:cJun.t4_rep2_chip_seq_narrowPeak	ENCFF239SIN	N/A
ChIP-seq	tim-reddy:cJun.t4	ENCSR708DGM	GSE92823	tim-reddy:cJun.t4_rep3_chip_seq_bam	ENCFF226ABL	N/A
ChIP-seq	tim-reddy:cJun.t4	ENCSR708DGM	GSE92823	tim-reddy:cJun.t4_rep3_chip_seq_bigWig	ENCFF752DAI	N/A
ChIP-seq	tim-reddy:cJun.t4	ENCSR708DGM	GSE92823	tim-reddy:cJun.t4_rep3_chip_seq_fastq	ENCFF051PHR	SRR5129644
ChIP-seq	tim-reddy:cJun.t4	ENCSR708DGM	GSE92823	tim-reddy:cJun.t4_rep3_chip_seq_narrowPeak	ENCFF951QAY	N/A
ChIP-seq	tim-reddy:cJun.t5	ENCSR504LBE	GSE92812	tim-reddy:cJun.t5_rep1_chip_seq_bam	ENCFF127IUK	N/A
ChIP-seq	tim-reddy:cJun.t5	ENCSR504LBE	GSE92812	tim-reddy:cJun.t5_rep1_chip_seq_bigWig	ENCFF908ERB	N/A
ChIP-seq	tim-reddy:cJun.t5	ENCSR504LBE	GSE92812	tim-reddy:cJun.t5_rep1_chip_seq_fastq	ENCFF794HUV	SRR5129583
ChIP-seq	tim-reddy:cJun.t5	ENCSR504LBE	GSE92812	tim-reddy:cJun.t5_rep1_chip_seq_narrowPeak	ENCFF173LRC	N/A
ChIP-seq	tim-reddy:cJun.t5	ENCSR504LBE	GSE92812	tim-reddy:cJun.t5_rep2_chip_seq_bam	ENCFF268SXG	N/A
ChIP-seq	tim-reddy:cJun.t5	ENCSR504LBE	GSE92812	tim-reddy:cJun.t5_rep2_chip_seq_bigWig	ENCFF844CEC	N/A
ChIP-seq	tim-reddy:cJun.t5	ENCSR504LBE	GSE92812	tim-reddy:cJun.t5_rep2_chip_seq_fastq	ENCFF325MYR	SRR5129584
ChIP-seq	tim-reddy:cJun.t5	ENCSR504LBE	GSE92812	tim-reddy:cJun.t5_rep2_chip_seq_narrowPeak	ENCFF464MCT	N/A
ChIP-seq	tim-reddy:cJun.t5	ENCSR504LBE	GSE92812	tim-reddy:cJun.t5_rep3_chip_seq_bam	ENCFF524HVD	N/A
ChIP-seq	tim-reddy:cJun.t5	ENCSR504LBE	GSE92812	tim-reddy:cJun.t5_rep3_chip_seq_bigWig	ENCFF032UUL	N/A
ChIP-seq	tim-reddy:cJun.t5	ENCSR504LBE	GSE92812	tim-reddy:cJun.t5_rep3_chip_seq_fastq	ENCFF038TFL	SRR5129582
ChIP-seq	tim-reddy:cJun.t5	ENCSR504LBE	GSE92812	tim-reddy:cJun.t5_rep3_chip_seq_narrowPeak	ENCFF408YLZ	N/A
ChIP-seq	tim-reddy:cJun.t6	ENCSR612GKD	GSE92817	tim-reddy:cJun.t6_rep1_chip_seq_bam	ENCFF278GIG	N/A
ChIP-seq	tim-reddy:cJun.t6	ENCSR612GKD	GSE92817	tim-reddy:cJun.t6_rep1_chip_seq_bigWig	ENCFF671DCL	N/A
ChIP-seq	tim-reddy:cJun.t6	ENCSR612GKD	GSE92817	tim-reddy:cJun.t6_rep1_chip_seq_fastq	ENCFF412CGA	SRR5129604
ChIP-seq	tim-reddy:cJun.t6	ENCSR612GKD	GSE92817	tim-reddy:cJun.t6_rep1_chip_seq_narrowPeak	ENCFF828IYI	N/A
ChIP-seq	tim-reddy:cJun.t6	ENCSR612GKD	GSE92817	tim-reddy:cJun.t6_rep2_chip_seq_bam	ENCFF903LTW	N/A
ChIP-seq	tim-reddy:cJun.t6	ENCSR612GKD	GSE92817	tim-reddy:cJun.t6_rep2_chip_seq_bigWig	ENCFF479UCU	N/A
ChIP-seq	tim-reddy:cJun.t6	ENCSR612GKD	GSE92817	tim-reddy:cJun.t6_rep2_chip_seq_fastq	ENCFF131ZPV	SRR5129605
ChIP-seq	tim-reddy:cJun.t6	ENCSR612GKD	GSE92817	tim-reddy:cJun.t6_rep2_chip_seq_narrowPeak	ENCFF376JKW	N/A
ChIP-seq	tim-reddy:cJun.t6	ENCSR612GKD	GSE92817	tim-reddy:cJun.t6_rep3_chip_seq_bam	ENCFF199WSZ	N/A
ChIP-seq	tim-reddy:cJun.t6	ENCSR612GKD	GSE92817	tim-reddy:cJun.t6_rep3_chip_seq_bigWig	ENCFF723IZY	N/A
ChIP-seq	tim-reddy:cJun.t6	ENCSR612GKD	GSE92817	tim-reddy:cJun.t6_rep3_chip_seq_fastq	ENCFF216FRU	SRR5129606
ChIP-seq	tim-reddy:cJun.t6	ENCSR612GKD	GSE92817	tim-reddy:cJun.t6_rep3_chip_seq_narrowPeak	ENCFF462MQF	N/A
ChIP-seq	tim-reddy:cJun.t7	ENCSR991RJM	GSE92833	tim-reddy:cJun.t7_rep1_chip_seq_bam	ENCFF854OZH	N/A
ChIP-seq	tim-reddy:cJun.t7	ENCSR991RJM	GSE92833	tim-reddy:cJun.t7_rep1_chip_seq_bigWig	ENCFF396IIK	N/A
ChIP-seq	tim-reddy:cJun.t7	ENCSR991RJM	GSE92833	tim-reddy:cJun.t7_rep1_chip_seq_fastq	ENCFF377LNU	SRR5129709
ChIP-seq	tim-reddy:cJun.t7	ENCSR991RJM	GSE92833	tim-reddy:cJun.t7_rep1_chip_seq_narrowPeak	ENCFF419QKU	N/A
ChIP-seq	tim-reddy:cJun.t7	ENCSR991RJM	GSE92833	tim-reddy:cJun.t7_rep2_chip_seq_bam	ENCFF422DDL	N/A
ChIP-seq	tim-reddy:cJun.t7	ENCSR991RJM	GSE92833	tim-reddy:cJun.t7_rep2_chip_seq_bigWig	ENCFF672VEW	N/A
ChIP-seq	tim-reddy:cJun.t7	ENCSR991RJM	GSE92833	tim-reddy:cJun.t7_rep2_chip_seq_fastq	ENCFF740BHU	SRR5129710
ChIP-seq	tim-reddy:cJun.t7	ENCSR991RJM	GSE92833	tim-reddy:cJun.t7_rep2_chip_seq_narrowPeak	ENCFF099CZE	N/A
ChIP-seq	tim-reddy:cJun.t7	ENCSR991RJM	GSE92833	tim-reddy:cJun.t7_rep3_chip_seq_bam	ENCFF634MSE	N/A
ChIP-seq	tim-reddy:cJun.t7	ENCSR991RJM	GSE92833	tim-reddy:cJun.t7_rep3_chip_seq_bigWig	ENCFF501RZR	N/A
ChIP-seq	tim-reddy:cJun.t7	ENCSR991RJM	GSE92833	tim-reddy:cJun.t7_rep3_chip_seq_fastq	ENCFF952EZK	SRR5129711
ChIP-seq	tim-reddy:cJun.t7	ENCSR991RJM	GSE92833	tim-reddy:cJun.t7_rep3_chip_seq_narrowPeak	ENCFF957IVO	N/A
ChIP-seq	tim-reddy:cJun.t8	ENCSR783THJ	GSE92827	tim-reddy:cJun.t8_rep1_chip_seq_bam	ENCFF208JDO	N/A
ChIP-seq	tim-reddy:cJun.t8	ENCSR783THJ	GSE92827	tim-reddy:cJun.t8_rep1_chip_seq_bigWig	ENCFF777FGF	N/A
ChIP-seq	tim-reddy:cJun.t8	ENCSR783THJ	GSE92827	tim-reddy:cJun.t8_rep1_chip_seq_fastq	ENCFF735GAQ	SRR5129686
ChIP-seq	tim-reddy:cJun.t8	ENCSR783THJ	GSE92827	tim-reddy:cJun.t8_rep1_chip_seq_narrowPeak	ENCFF898VEC	N/A
ChIP-seq	tim-reddy:cJun.t8	ENCSR783THJ	GSE92827	tim-reddy:cJun.t8_rep2_chip_seq_bam	ENCFF050AWF	N/A
ChIP-seq	tim-reddy:cJun.t8	ENCSR783THJ	GSE92827	tim-reddy:cJun.t8_rep2_chip_seq_bigWig	ENCFF581BWW	N/A
ChIP-seq	tim-reddy:cJun.t8	ENCSR783THJ	GSE92827	tim-reddy:cJun.t8_rep2_chip_seq_fastq	ENCFF818FHL	SRR5129687
ChIP-seq	tim-reddy:cJun.t8	ENCSR783THJ	GSE92827	tim-reddy:cJun.t8_rep2_chip_seq_narrowPeak	ENCFF827LBN	N/A
ChIP-seq	tim-reddy:cJun.t8	ENCSR783THJ	GSE92827	tim-reddy:cJun.t8_rep3_chip_seq_bam	ENCFF414RDL	N/A
ChIP-seq	tim-reddy:cJun.t8	ENCSR783THJ	GSE92827	tim-reddy:cJun.t8_rep3_chip_seq_bigWig	ENCFF872QEU	N/A
ChIP-seq	tim-reddy:cJun.t8	ENCSR783THJ	GSE92827	tim-reddy:cJun.t8_rep3_chip_seq_fastq	ENCFF975QVZ	SRR5129685
ChIP-seq	tim-reddy:cJun.t8	ENCSR783THJ	GSE92827	tim-reddy:cJun.t8_rep3_chip_seq_narrowPeak	ENCFF873BYJ	N/A
ChIP-seq	tim-reddy:CTCF.t00	ENCSR035OXA	GSE92782	tim-reddy:CTCF.t00_rep1_chip_seq_bam	ENCFF810IXF	N/A
ChIP-seq	tim-reddy:CTCF.t00	ENCSR035OXA	GSE92782	tim-reddy:CTCF.t00_rep1_chip_seq_bigWig	ENCFF612FOZ	N/A
ChIP-seq	tim-reddy:CTCF.t00	ENCSR035OXA	GSE92782	tim-reddy:CTCF.t00_rep1_chip_seq_fastq	ENCFF057RFO	SRR5129541
ChIP-seq	tim-reddy:CTCF.t00	ENCSR035OXA	GSE92782	tim-reddy:CTCF.t00_rep1_chip_seq_narrowPeak	ENCFF465EGH	N/A
ChIP-seq	tim-reddy:CTCF.t00	ENCSR035OXA	GSE92782	tim-reddy:CTCF.t00_rep2_chip_seq_bam	ENCFF774IBY	N/A
ChIP-seq	tim-reddy:CTCF.t00	ENCSR035OXA	GSE92782	tim-reddy:CTCF.t00_rep2_chip_seq_bigWig	ENCFF952WAT	N/A
ChIP-seq	tim-reddy:CTCF.t00	ENCSR035OXA	GSE92782	tim-reddy:CTCF.t00_rep2_chip_seq_fastq	ENCFF990FHA	SRR5129539
ChIP-seq	tim-reddy:CTCF.t00	ENCSR035OXA	GSE92782	tim-reddy:CTCF.t00_rep2_chip_seq_narrowPeak	ENCFF751UOX	N/A
ChIP-seq	tim-reddy:CTCF.t00	ENCSR035OXA	GSE92782	tim-reddy:CTCF.t00_rep3_chip_seq_bam	ENCFF713UMA	N/A
ChIP-seq	tim-reddy:CTCF.t00	ENCSR035OXA	GSE92782	tim-reddy:CTCF.t00_rep3_chip_seq_bigWig	ENCFF361FZF	N/A
ChIP-seq	tim-reddy:CTCF.t00	ENCSR035OXA	GSE92782	tim-reddy:CTCF.t00_rep3_chip_seq_fastq	ENCFF331SPC	SRR5129540
ChIP-seq	tim-reddy:CTCF.t00	ENCSR035OXA	GSE92782	tim-reddy:CTCF.t00_rep3_chip_seq_narrowPeak	ENCFF531OAI	N/A
ChIP-seq	tim-reddy:CTCF.t05	ENCSR553UWG	GSE92814	tim-reddy:CTCF.t05_rep1_chip_seq_bam	ENCFF532THR	N/A
ChIP-seq	tim-reddy:CTCF.t05	ENCSR553UWG	GSE92814	tim-reddy:CTCF.t05_rep1_chip_seq_bigWig	ENCFF538GDX	N/A
ChIP-seq	tim-reddy:CTCF.t05	ENCSR553UWG	GSE92814	tim-reddy:CTCF.t05_rep1_chip_seq_fastq	ENCFF084GDM	SRR5129601
ChIP-seq	tim-reddy:CTCF.t05	ENCSR553UWG	GSE92814	tim-reddy:CTCF.t05_rep1_chip_seq_narrowPeak	ENCFF181JBX	N/A
ChIP-seq	tim-reddy:CTCF.t05	ENCSR553UWG	GSE92814	tim-reddy:CTCF.t05_rep2_chip_seq_bam	ENCFF050UTO	N/A
ChIP-seq	tim-reddy:CTCF.t05	ENCSR553UWG	GSE92814	tim-reddy:CTCF.t05_rep2_chip_seq_bigWig	ENCFF865IZS	N/A
ChIP-seq	tim-reddy:CTCF.t05	ENCSR553UWG	GSE92814	tim-reddy:CTCF.t05_rep2_chip_seq_fastq	ENCFF591QVQ	SRR5129600
ChIP-seq	tim-reddy:CTCF.t05	ENCSR553UWG	GSE92814	tim-reddy:CTCF.t05_rep3_chip_seq_bam	ENCFF379VUR	N/A
ChIP-seq	tim-reddy:CTCF.t05	ENCSR553UWG	GSE92814	tim-reddy:CTCF.t05_rep3_chip_seq_bigWig	ENCFF393HKF	N/A
ChIP-seq	tim-reddy:CTCF.t05	ENCSR553UWG	GSE92814	tim-reddy:CTCF.t05_rep3_chip_seq_fastq	ENCFF480XVK	SRR5129599
ChIP-seq	tim-reddy:CTCF.t10	ENCSR336VBV	GSE92800	tim-reddy:CTCF.t10_rep1_chip_seq_bam	ENCFF527UXJ	N/A
ChIP-seq	tim-reddy:CTCF.t10	ENCSR336VBV	GSE92800	tim-reddy:CTCF.t10_rep1_chip_seq_bigWig	ENCFF201WSJ	N/A
ChIP-seq	tim-reddy:CTCF.t10	ENCSR336VBV	GSE92800	tim-reddy:CTCF.t10_rep1_chip_seq_fastq	ENCFF813OAX	SRR5129682
ChIP-seq	tim-reddy:CTCF.t10	ENCSR336VBV	GSE92800	tim-reddy:CTCF.t10_rep1_chip_seq_narrowPeak	ENCFF334WKT	N/A
ChIP-seq	tim-reddy:CTCF.t10	ENCSR336VBV	GSE92800	tim-reddy:CTCF.t10_rep2_chip_seq_bam	ENCFF997XYH	N/A
ChIP-seq	tim-reddy:CTCF.t10	ENCSR336VBV	GSE92800	tim-reddy:CTCF.t10_rep2_chip_seq_bigWig	ENCFF041WTX	N/A
ChIP-seq	tim-reddy:CTCF.t10	ENCSR336VBV	GSE92800	tim-reddy:CTCF.t10_rep2_chip_seq_fastq	ENCFF746KFL	SRR5129683
ChIP-seq	tim-reddy:CTCF.t10	ENCSR336VBV	GSE92800	tim-reddy:CTCF.t10_rep2_chip_seq_narrowPeak	ENCFF893EPT	N/A
ChIP-seq	tim-reddy:CTCF.t10	ENCSR336VBV	GSE92800	tim-reddy:CTCF.t10_rep3_chip_seq_bam	ENCFF382CPK	N/A
ChIP-seq	tim-reddy:CTCF.t10	ENCSR336VBV	GSE92800	tim-reddy:CTCF.t10_rep3_chip_seq_bigWig	ENCFF902NYX	N/A
ChIP-seq	tim-reddy:CTCF.t10	ENCSR336VBV	GSE92800	tim-reddy:CTCF.t10_rep3_chip_seq_fastq	ENCFF209SXY	SRR5129684
ChIP-seq	tim-reddy:CTCF.t10	ENCSR336VBV	GSE92800	tim-reddy:CTCF.t10_rep3_chip_seq_narrowPeak	ENCFF407DRV	N/A
ChIP-seq	tim-reddy:CTCF.t12	ENCSR414CQB	GSE92805	tim-reddy:CTCF.t12_rep1_chip_seq_bam	ENCFF437EOE	N/A
ChIP-seq	tim-reddy:CTCF.t12	ENCSR414CQB	GSE92805	tim-reddy:CTCF.t12_rep1_chip_seq_bigWig	ENCFF036KFK	N/A
ChIP-seq	tim-reddy:CTCF.t12	ENCSR414CQB	GSE92805	tim-reddy:CTCF.t12_rep1_chip_seq_fastq	ENCFF016IVG	SRR5129678
ChIP-seq	tim-reddy:CTCF.t12	ENCSR414CQB	GSE92805	tim-reddy:CTCF.t12_rep1_chip_seq_narrowPeak	ENCFF917DPF	N/A
ChIP-seq	tim-reddy:CTCF.t12	ENCSR414CQB	GSE92805	tim-reddy:CTCF.t12_rep2_chip_seq_bam	ENCFF469RRB	N/A
ChIP-seq	tim-reddy:CTCF.t12	ENCSR414CQB	GSE92805	tim-reddy:CTCF.t12_rep2_chip_seq_bigWig	ENCFF345CNV	N/A
ChIP-seq	tim-reddy:CTCF.t12	ENCSR414CQB	GSE92805	tim-reddy:CTCF.t12_rep2_chip_seq_fastq	ENCFF984HWD	SRR5129676
ChIP-seq	tim-reddy:CTCF.t12	ENCSR414CQB	GSE92805	tim-reddy:CTCF.t12_rep2_chip_seq_narrowPeak	ENCFF234IET	N/A
ChIP-seq	tim-reddy:CTCF.t12	ENCSR414CQB	GSE92805	tim-reddy:CTCF.t12_rep3_chip_seq_bam	ENCFF257CBZ	N/A
ChIP-seq	tim-reddy:CTCF.t12	ENCSR414CQB	GSE92805	tim-reddy:CTCF.t12_rep3_chip_seq_bigWig	ENCFF960JIZ	N/A
ChIP-seq	tim-reddy:CTCF.t12	ENCSR414CQB	GSE92805	tim-reddy:CTCF.t12_rep3_chip_seq_fastq	ENCFF456HVM	SRR5129677
ChIP-seq	tim-reddy:CTCF.t12	ENCSR414CQB	GSE92805	tim-reddy:CTCF.t12_rep3_chip_seq_narrowPeak	ENCFF607OIR	N/A
ChIP-seq	tim-reddy:CTCF.t1	ENCSR249JOH	GSE92794	tim-reddy:CTCF.t1_rep1_chip_seq_bam	ENCFF356NSD	N/A
ChIP-seq	tim-reddy:CTCF.t1	ENCSR249JOH	GSE92794	tim-reddy:CTCF.t1_rep1_chip_seq_bigWig	ENCFF461NCL	N/A
ChIP-seq	tim-reddy:CTCF.t1	ENCSR249JOH	GSE92794	tim-reddy:CTCF.t1_rep1_chip_seq_fastq	ENCFF177RCB	SRR5129594
ChIP-seq	tim-reddy:CTCF.t1	ENCSR249JOH	GSE92794	tim-reddy:CTCF.t1_rep1_chip_seq_narrowPeak	ENCFF015XGN	N/A
ChIP-seq	tim-reddy:CTCF.t1	ENCSR249JOH	GSE92794	tim-reddy:CTCF.t1_rep2_chip_seq_bam	ENCFF180EPT	N/A
ChIP-seq	tim-reddy:CTCF.t1	ENCSR249JOH	GSE92794	tim-reddy:CTCF.t1_rep2_chip_seq_bigWig	ENCFF820DFP	N/A
ChIP-seq	tim-reddy:CTCF.t1	ENCSR249JOH	GSE92794	tim-reddy:CTCF.t1_rep2_chip_seq_fastq	ENCFF566BZO	SRR5129595
ChIP-seq	tim-reddy:CTCF.t1	ENCSR249JOH	GSE92794	tim-reddy:CTCF.t1_rep2_chip_seq_narrowPeak	ENCFF165UME	N/A
ChIP-seq	tim-reddy:CTCF.t1	ENCSR249JOH	GSE92794	tim-reddy:CTCF.t1_rep3_chip_seq_bam	ENCFF951KQC	N/A
ChIP-seq	tim-reddy:CTCF.t1	ENCSR249JOH	GSE92794	tim-reddy:CTCF.t1_rep3_chip_seq_bigWig	ENCFF327CTH	N/A
ChIP-seq	tim-reddy:CTCF.t1	ENCSR249JOH	GSE92794	tim-reddy:CTCF.t1_rep3_chip_seq_fastq	ENCFF339MJW	SRR5129596
ChIP-seq	tim-reddy:CTCF.t1	ENCSR249JOH	GSE92794	tim-reddy:CTCF.t1_rep3_chip_seq_narrowPeak	ENCFF841ODZ	N/A
ChIP-seq	tim-reddy:CTCF.t2	ENCSR384KPP	GSE92803	tim-reddy:CTCF.t2_rep1_chip_seq_bam	ENCFF823GRU	N/A
ChIP-seq	tim-reddy:CTCF.t2	ENCSR384KPP	GSE92803	tim-reddy:CTCF.t2_rep1_chip_seq_bigWig	ENCFF930CJA	N/A
ChIP-seq	tim-reddy:CTCF.t2	ENCSR384KPP	GSE92803	tim-reddy:CTCF.t2_rep1_chip_seq_fastq	ENCFF470TWY	SRR5129566
ChIP-seq	tim-reddy:CTCF.t2	ENCSR384KPP	GSE92803	tim-reddy:CTCF.t2_rep1_chip_seq_narrowPeak	ENCFF846CJQ	N/A
ChIP-seq	tim-reddy:CTCF.t2	ENCSR384KPP	GSE92803	tim-reddy:CTCF.t2_rep2_chip_seq_bam	ENCFF127HJL	N/A
ChIP-seq	tim-reddy:CTCF.t2	ENCSR384KPP	GSE92803	tim-reddy:CTCF.t2_rep2_chip_seq_bigWig	ENCFF885MVJ	N/A
ChIP-seq	tim-reddy:CTCF.t2	ENCSR384KPP	GSE92803	tim-reddy:CTCF.t2_rep2_chip_seq_fastq	ENCFF812SLL	SRR5129568
ChIP-seq	tim-reddy:CTCF.t2	ENCSR384KPP	GSE92803	tim-reddy:CTCF.t2_rep2_chip_seq_narrowPeak	ENCFF474KCW	N/A
ChIP-seq	tim-reddy:CTCF.t2	ENCSR384KPP	GSE92803	tim-reddy:CTCF.t2_rep3_chip_seq_bam	ENCFF069WEP	N/A
ChIP-seq	tim-reddy:CTCF.t2	ENCSR384KPP	GSE92803	tim-reddy:CTCF.t2_rep3_chip_seq_bigWig	ENCFF905DAS	N/A
ChIP-seq	tim-reddy:CTCF.t2	ENCSR384KPP	GSE92803	tim-reddy:CTCF.t2_rep3_chip_seq_fastq	ENCFF820SVP	SRR5129567
ChIP-seq	tim-reddy:CTCF.t2	ENCSR384KPP	GSE92803	tim-reddy:CTCF.t2_rep3_chip_seq_narrowPeak	ENCFF204VDS	N/A
ChIP-seq	tim-reddy:CTCF.t3	ENCSR851SOK	GSE92830	tim-reddy:CTCF.t3_rep1_chip_seq_bam	ENCFF532VUH	N/A
ChIP-seq	tim-reddy:CTCF.t3	ENCSR851SOK	GSE92830	tim-reddy:CTCF.t3_rep1_chip_seq_bigWig	ENCFF959XRF	N/A
ChIP-seq	tim-reddy:CTCF.t3	ENCSR851SOK	GSE92830	tim-reddy:CTCF.t3_rep1_chip_seq_fastq	ENCFF629SRK	SRR5129673
ChIP-seq	tim-reddy:CTCF.t3	ENCSR851SOK	GSE92830	tim-reddy:CTCF.t3_rep2_chip_seq_bam	ENCFF312HCW	N/A
ChIP-seq	tim-reddy:CTCF.t3	ENCSR851SOK	GSE92830	tim-reddy:CTCF.t3_rep2_chip_seq_bigWig	ENCFF714DRS	N/A
ChIP-seq	tim-reddy:CTCF.t3	ENCSR851SOK	GSE92830	tim-reddy:CTCF.t3_rep2_chip_seq_fastq	ENCFF037TEU	SRR5129672
ChIP-seq	tim-reddy:CTCF.t3	ENCSR851SOK	GSE92830	tim-reddy:CTCF.t3_rep2_chip_seq_narrowPeak	ENCFF955ONX	N/A
ChIP-seq	tim-reddy:CTCF.t3	ENCSR851SOK	GSE92830	tim-reddy:CTCF.t3_rep3_chip_seq_bam	ENCFF539UJP	N/A
ChIP-seq	tim-reddy:CTCF.t3	ENCSR851SOK	GSE92830	tim-reddy:CTCF.t3_rep3_chip_seq_bigWig	ENCFF452EAD	N/A
ChIP-seq	tim-reddy:CTCF.t3	ENCSR851SOK	GSE92830	tim-reddy:CTCF.t3_rep3_chip_seq_fastq	ENCFF023SLM	SRR5129671
ChIP-seq	tim-reddy:CTCF.t4	ENCSR130TQM	GSE92786	tim-reddy:CTCF.t4_rep1_chip_seq_bam	ENCFF295PIG	N/A
ChIP-seq	tim-reddy:CTCF.t4	ENCSR130TQM	GSE92786	tim-reddy:CTCF.t4_rep1_chip_seq_bigWig	ENCFF155DGM	N/A
ChIP-seq	tim-reddy:CTCF.t4	ENCSR130TQM	GSE92786	tim-reddy:CTCF.t4_rep1_chip_seq_fastq	ENCFF134WLB	SRR5129555
ChIP-seq	tim-reddy:CTCF.t4	ENCSR130TQM	GSE92786	tim-reddy:CTCF.t4_rep1_chip_seq_narrowPeak	ENCFF193YLU	N/A
ChIP-seq	tim-reddy:CTCF.t4	ENCSR130TQM	GSE92786	tim-reddy:CTCF.t4_rep2_chip_seq_bam	ENCFF129KWX	N/A
ChIP-seq	tim-reddy:CTCF.t4	ENCSR130TQM	GSE92786	tim-reddy:CTCF.t4_rep2_chip_seq_bigWig	ENCFF878IOC	N/A
ChIP-seq	tim-reddy:CTCF.t4	ENCSR130TQM	GSE92786	tim-reddy:CTCF.t4_rep2_chip_seq_fastq	ENCFF632YGZ	SRR5129554
ChIP-seq	tim-reddy:CTCF.t4	ENCSR130TQM	GSE92786	tim-reddy:CTCF.t4_rep3_chip_seq_bam	ENCFF899PRC	N/A
ChIP-seq	tim-reddy:CTCF.t4	ENCSR130TQM	GSE92786	tim-reddy:CTCF.t4_rep3_chip_seq_bigWig	ENCFF622XHO	N/A
ChIP-seq	tim-reddy:CTCF.t4	ENCSR130TQM	GSE92786	tim-reddy:CTCF.t4_rep3_chip_seq_fastq	ENCFF562YWN	SRR5129556
ChIP-seq	tim-reddy:CTCF.t4	ENCSR130TQM	GSE92786	tim-reddy:CTCF.t4_rep3_chip_seq_narrowPeak	ENCFF452IFH	N/A
ChIP-seq	tim-reddy:CTCF.t5	ENCSR876UZD	GSE92832	tim-reddy:CTCF.t5_rep1_chip_seq_bam	ENCFF648TLU	N/A
ChIP-seq	tim-reddy:CTCF.t5	ENCSR876UZD	GSE92832	tim-reddy:CTCF.t5_rep1_chip_seq_bigWig	ENCFF253ADS	N/A
ChIP-seq	tim-reddy:CTCF.t5	ENCSR876UZD	GSE92832	tim-reddy:CTCF.t5_rep1_chip_seq_fastq	ENCFF915BLC	SRR5129669
ChIP-seq	tim-reddy:CTCF.t5	ENCSR876UZD	GSE92832	tim-reddy:CTCF.t5_rep2_chip_seq_bam	ENCFF759RVV	N/A
ChIP-seq	tim-reddy:CTCF.t5	ENCSR876UZD	GSE92832	tim-reddy:CTCF.t5_rep2_chip_seq_bigWig	ENCFF027FJN	N/A
ChIP-seq	tim-reddy:CTCF.t5	ENCSR876UZD	GSE92832	tim-reddy:CTCF.t5_rep2_chip_seq_fastq	ENCFF030MGP	SRR5129670
ChIP-seq	tim-reddy:CTCF.t5	ENCSR876UZD	GSE92832	tim-reddy:CTCF.t5_rep2_chip_seq_narrowPeak	ENCFF921XYL	N/A
ChIP-seq	tim-reddy:CTCF.t5	ENCSR876UZD	GSE92832	tim-reddy:CTCF.t5_rep3_chip_seq_bam	ENCFF214ROK	N/A
ChIP-seq	tim-reddy:CTCF.t5	ENCSR876UZD	GSE92832	tim-reddy:CTCF.t5_rep3_chip_seq_bigWig	ENCFF441JCU	N/A
ChIP-seq	tim-reddy:CTCF.t5	ENCSR876UZD	GSE92832	tim-reddy:CTCF.t5_rep3_chip_seq_fastq	ENCFF356FDX	SRR5129668
ChIP-seq	tim-reddy:CTCF.t5	ENCSR876UZD	GSE92832	tim-reddy:CTCF.t5_rep3_chip_seq_narrowPeak	ENCFF702GWV	N/A
ChIP-seq	tim-reddy:CTCF.t6	ENCSR287UXS	GSE92797	tim-reddy:CTCF.t6_rep1_chip_seq_bam	ENCFF920VEX	N/A
ChIP-seq	tim-reddy:CTCF.t6	ENCSR287UXS	GSE92797	tim-reddy:CTCF.t6_rep1_chip_seq_bigWig	ENCFF598NUQ	N/A
ChIP-seq	tim-reddy:CTCF.t6	ENCSR287UXS	GSE92797	tim-reddy:CTCF.t6_rep1_chip_seq_fastq	ENCFF296AYY	SRR5129578
ChIP-seq	tim-reddy:CTCF.t6	ENCSR287UXS	GSE92797	tim-reddy:CTCF.t6_rep1_chip_seq_narrowPeak	ENCFF670DTN	N/A
ChIP-seq	tim-reddy:CTCF.t6	ENCSR287UXS	GSE92797	tim-reddy:CTCF.t6_rep2_chip_seq_bam	ENCFF200SIA	N/A
ChIP-seq	tim-reddy:CTCF.t6	ENCSR287UXS	GSE92797	tim-reddy:CTCF.t6_rep2_chip_seq_bigWig	ENCFF560ILQ	N/A
ChIP-seq	tim-reddy:CTCF.t6	ENCSR287UXS	GSE92797	tim-reddy:CTCF.t6_rep2_chip_seq_fastq	ENCFF466EUK	SRR5129577
ChIP-seq	tim-reddy:CTCF.t7	ENCSR173IEA	GSE92789	tim-reddy:CTCF.t7_rep1_chip_seq_bam	ENCFF153YTX	N/A
ChIP-seq	tim-reddy:CTCF.t7	ENCSR173IEA	GSE92789	tim-reddy:CTCF.t7_rep1_chip_seq_bigWig	ENCFF526ZDS	N/A
ChIP-seq	tim-reddy:CTCF.t7	ENCSR173IEA	GSE92789	tim-reddy:CTCF.t7_rep1_chip_seq_fastq	ENCFF200PSY	SRR5129586
ChIP-seq	tim-reddy:CTCF.t7	ENCSR173IEA	GSE92789	tim-reddy:CTCF.t7_rep1_chip_seq_narrowPeak	ENCFF973PXA	N/A
ChIP-seq	tim-reddy:CTCF.t7	ENCSR173IEA	GSE92789	tim-reddy:CTCF.t7_rep2_chip_seq_bam	ENCFF499QGU	N/A
ChIP-seq	tim-reddy:CTCF.t7	ENCSR173IEA	GSE92789	tim-reddy:CTCF.t7_rep2_chip_seq_bigWig	ENCFF789TMU	N/A
ChIP-seq	tim-reddy:CTCF.t7	ENCSR173IEA	GSE92789	tim-reddy:CTCF.t7_rep2_chip_seq_fastq	ENCFF260ODA	SRR5129587
ChIP-seq	tim-reddy:CTCF.t7	ENCSR173IEA	GSE92789	tim-reddy:CTCF.t7_rep3_chip_seq_bam	ENCFF393MLY	N/A
ChIP-seq	tim-reddy:CTCF.t7	ENCSR173IEA	GSE92789	tim-reddy:CTCF.t7_rep3_chip_seq_bigWig	ENCFF908JPE	N/A
ChIP-seq	tim-reddy:CTCF.t7	ENCSR173IEA	GSE92789	tim-reddy:CTCF.t7_rep3_chip_seq_fastq	ENCFF627GKY	SRR5129585
ChIP-seq	tim-reddy:CTCF.t7	ENCSR173IEA	GSE92789	tim-reddy:CTCF.t7_rep3_chip_seq_narrowPeak	ENCFF926VCR	N/A
ChIP-seq	tim-reddy:CTCF.t8	ENCSR432AXE	GSE92808	tim-reddy:CTCF.t8_rep1_chip_seq_bam	ENCFF917UEY	N/A
ChIP-seq	tim-reddy:CTCF.t8	ENCSR432AXE	GSE92808	tim-reddy:CTCF.t8_rep1_chip_seq_bigWig	ENCFF644UKY	N/A
ChIP-seq	tim-reddy:CTCF.t8	ENCSR432AXE	GSE92808	tim-reddy:CTCF.t8_rep1_chip_seq_fastq	ENCFF671PHW	SRR5129618
ChIP-seq	tim-reddy:CTCF.t8	ENCSR432AXE	GSE92808	tim-reddy:CTCF.t8_rep2_chip_seq_bam	ENCFF478XRY	N/A
ChIP-seq	tim-reddy:CTCF.t8	ENCSR432AXE	GSE92808	tim-reddy:CTCF.t8_rep2_chip_seq_bigWig	ENCFF584VST	N/A
ChIP-seq	tim-reddy:CTCF.t8	ENCSR432AXE	GSE92808	tim-reddy:CTCF.t8_rep2_chip_seq_fastq	ENCFF563ZOF	SRR5129617
ChIP-seq	tim-reddy:CTCF.t8	ENCSR432AXE	GSE92808	tim-reddy:CTCF.t8_rep3_chip_seq_bam	ENCFF752JUA	N/A
ChIP-seq	tim-reddy:CTCF.t8	ENCSR432AXE	GSE92808	tim-reddy:CTCF.t8_rep3_chip_seq_bigWig	ENCFF954YBZ	N/A
ChIP-seq	tim-reddy:CTCF.t8	ENCSR432AXE	GSE92808	tim-reddy:CTCF.t8_rep3_chip_seq_fastq	ENCFF529XZV	SRR5129616
ChIP-seq	tim-reddy:ctrl_001.t00	ENCSR838ZAU	GSE91343	tim-reddy:ctrl_001.t00_rep1_chip_seq_bam	ENCFF159VBZ	N/A
ChIP-seq	tim-reddy:ctrl_001.t00	ENCSR838ZAU	GSE91343	tim-reddy:ctrl_001.t00_rep1_chip_seq_fastq	ENCFF806LFR	SRR5093143
ChIP-seq	tim-reddy:ctrl_001.t00	ENCSR838ZAU	GSE91343	tim-reddy:ctrl_001.t00_rep2_chip_seq_bam	ENCFF813FWF	N/A
ChIP-seq	tim-reddy:ctrl_001.t00	ENCSR838ZAU	GSE91343	tim-reddy:ctrl_001.t00_rep2_chip_seq_fastq	ENCFF136DNO	SRR5093145
ChIP-seq	tim-reddy:ctrl_001.t00	ENCSR838ZAU	GSE91343	tim-reddy:ctrl_001.t00_rep3_chip_seq_bam	ENCFF236QYF	N/A
ChIP-seq	tim-reddy:ctrl_001.t00	ENCSR838ZAU	GSE91343	tim-reddy:ctrl_001.t00_rep3_chip_seq_fastq	ENCFF877DLC	SRR5093144
ChIP-seq	tim-reddy:ctrl_001.t05	ENCSR491TAD	GSE91274	tim-reddy:ctrl_001.t05_rep1_chip_seq_bam	ENCFF869CFK	N/A
ChIP-seq	tim-reddy:ctrl_001.t05	ENCSR491TAD	GSE91274	tim-reddy:ctrl_001.t05_rep1_chip_seq_fastq	ENCFF133HKU	SRR5092938
ChIP-seq	tim-reddy:ctrl_001.t05	ENCSR491TAD	GSE91274	tim-reddy:ctrl_001.t05_rep2_chip_seq_bam	ENCFF672SZY	N/A
ChIP-seq	tim-reddy:ctrl_001.t05	ENCSR491TAD	GSE91274	tim-reddy:ctrl_001.t05_rep2_chip_seq_fastq	ENCFF619EHQ	SRR5092939
ChIP-seq	tim-reddy:ctrl_001.t05	ENCSR491TAD	GSE91274	tim-reddy:ctrl_001.t05_rep3_chip_seq_bam	ENCFF634KQK	N/A
ChIP-seq	tim-reddy:ctrl_001.t05	ENCSR491TAD	GSE91274	tim-reddy:ctrl_001.t05_rep3_chip_seq_fastq	ENCFF796VRG	SRR5092940
ChIP-seq	tim-reddy:ctrl_001.t10	ENCSR310TYO	GSE91240	tim-reddy:ctrl_001.t10_rep1_chip_seq_bam	ENCFF497VSZ	N/A
ChIP-seq	tim-reddy:ctrl_001.t10	ENCSR310TYO	GSE91240	tim-reddy:ctrl_001.t10_rep1_chip_seq_fastq	ENCFF689LDK	SRR5093405
ChIP-seq	tim-reddy:ctrl_001.t10	ENCSR310TYO	GSE91240	tim-reddy:ctrl_001.t10_rep2_chip_seq_bam	ENCFF293SHQ	N/A
ChIP-seq	tim-reddy:ctrl_001.t10	ENCSR310TYO	GSE91240	tim-reddy:ctrl_001.t10_rep2_chip_seq_fastq	ENCFF572ZEF	SRR5093404
ChIP-seq	tim-reddy:ctrl_001.t10	ENCSR310TYO	GSE91240	tim-reddy:ctrl_001.t10_rep3_chip_seq_bam	ENCFF940WFM	N/A
ChIP-seq	tim-reddy:ctrl_001.t10	ENCSR310TYO	GSE91240	tim-reddy:ctrl_001.t10_rep3_chip_seq_fastq	ENCFF649OIW	SRR5093403
ChIP-seq	tim-reddy:ctrl_001.t12	ENCSR549SVK	GSE91286	tim-reddy:ctrl_001.t12_rep1_chip_seq_bam	ENCFF166FHD	N/A
ChIP-seq	tim-reddy:ctrl_001.t12	ENCSR549SVK	GSE91286	tim-reddy:ctrl_001.t12_rep1_chip_seq_fastq	ENCFF524OKJ	SRR5092975
ChIP-seq	tim-reddy:ctrl_001.t12	ENCSR549SVK	GSE91286	tim-reddy:ctrl_001.t12_rep2_chip_seq_bam	ENCFF686FKZ	N/A
ChIP-seq	tim-reddy:ctrl_001.t12	ENCSR549SVK	GSE91286	tim-reddy:ctrl_001.t12_rep2_chip_seq_fastq	ENCFF612KDN	SRR5092974
ChIP-seq	tim-reddy:ctrl_001.t12	ENCSR549SVK	GSE91286	tim-reddy:ctrl_001.t12_rep3_chip_seq_bam	ENCFF221EVX	N/A
ChIP-seq	tim-reddy:ctrl_001.t12	ENCSR549SVK	GSE91286	tim-reddy:ctrl_001.t12_rep3_chip_seq_fastq	ENCFF232NPZ	SRR5092973
ChIP-seq	tim-reddy:ctrl_001.t1	ENCSR548SPY	GSE91285	tim-reddy:ctrl_001.t1_rep1_chip_seq_bam	ENCFF429DLV	N/A
ChIP-seq	tim-reddy:ctrl_001.t1	ENCSR548SPY	GSE91285	tim-reddy:ctrl_001.t1_rep1_chip_seq_fastq	ENCFF861ALF	SRR5092984
ChIP-seq	tim-reddy:ctrl_001.t1	ENCSR548SPY	GSE91285	tim-reddy:ctrl_001.t1_rep2_chip_seq_bam	ENCFF540VMP	N/A
ChIP-seq	tim-reddy:ctrl_001.t1	ENCSR548SPY	GSE91285	tim-reddy:ctrl_001.t1_rep2_chip_seq_fastq	ENCFF182GXC	SRR5092982
ChIP-seq	tim-reddy:ctrl_001.t1	ENCSR548SPY	GSE91285	tim-reddy:ctrl_001.t1_rep3_chip_seq_bam	ENCFF353MMY	N/A
ChIP-seq	tim-reddy:ctrl_001.t1	ENCSR548SPY	GSE91285	tim-reddy:ctrl_001.t1_rep3_chip_seq_fastq	ENCFF886LFW	SRR5092983
ChIP-seq	tim-reddy:ctrl_001.t2	ENCSR344ERJ	GSE91246	tim-reddy:ctrl_001.t2_rep1_chip_seq_bam	ENCFF198RJG	N/A
ChIP-seq	tim-reddy:ctrl_001.t2	ENCSR344ERJ	GSE91246	tim-reddy:ctrl_001.t2_rep1_chip_seq_fastq	ENCFF684DXF	SRR5093417
ChIP-seq	tim-reddy:ctrl_001.t2	ENCSR344ERJ	GSE91246	tim-reddy:ctrl_001.t2_rep2_chip_seq_bam	ENCFF965XSL	N/A
ChIP-seq	tim-reddy:ctrl_001.t2	ENCSR344ERJ	GSE91246	tim-reddy:ctrl_001.t2_rep2_chip_seq_fastq	ENCFF947TCS	SRR5093419
ChIP-seq	tim-reddy:ctrl_001.t2	ENCSR344ERJ	GSE91246	tim-reddy:ctrl_001.t2_rep3_chip_seq_bam	ENCFF378NYK	N/A
ChIP-seq	tim-reddy:ctrl_001.t2	ENCSR344ERJ	GSE91246	tim-reddy:ctrl_001.t2_rep3_chip_seq_fastq	ENCFF936FEO	SRR5093418
ChIP-seq	tim-reddy:ctrl_001.t3	ENCSR325PXS	GSE91242	tim-reddy:ctrl_001.t3_rep1_chip_seq_bam	ENCFF027OCG	N/A
ChIP-seq	tim-reddy:ctrl_001.t3	ENCSR325PXS	GSE91242	tim-reddy:ctrl_001.t3_rep1_chip_seq_fastq	ENCFF928FXR	SRR5093407
ChIP-seq	tim-reddy:ctrl_001.t3	ENCSR325PXS	GSE91242	tim-reddy:ctrl_001.t3_rep2_chip_seq_bam	ENCFF397JTQ	N/A
ChIP-seq	tim-reddy:ctrl_001.t3	ENCSR325PXS	GSE91242	tim-reddy:ctrl_001.t3_rep2_chip_seq_fastq	ENCFF786UZX	SRR5093406
ChIP-seq	tim-reddy:ctrl_001.t3	ENCSR325PXS	GSE91242	tim-reddy:ctrl_001.t3_rep3_chip_seq_bam	ENCFF219AQO	N/A
ChIP-seq	tim-reddy:ctrl_001.t3	ENCSR325PXS	GSE91242	tim-reddy:ctrl_001.t3_rep3_chip_seq_fastq	ENCFF695BNF	SRR5093408
ChIP-seq	tim-reddy:ctrl_001.t4	ENCSR872BBM	GSE91347	tim-reddy:ctrl_001.t4_rep1_chip_seq_bam	ENCFF937AEN	N/A
ChIP-seq	tim-reddy:ctrl_001.t4	ENCSR872BBM	GSE91347	tim-reddy:ctrl_001.t4_rep1_chip_seq_fastq	ENCFF126TIE	SRR5093158
ChIP-seq	tim-reddy:ctrl_001.t4	ENCSR872BBM	GSE91347	tim-reddy:ctrl_001.t4_rep2_chip_seq_bam	ENCFF497UFH	N/A
ChIP-seq	tim-reddy:ctrl_001.t4	ENCSR872BBM	GSE91347	tim-reddy:ctrl_001.t4_rep2_chip_seq_fastq	ENCFF039RED	SRR5093159
ChIP-seq	tim-reddy:ctrl_001.t4	ENCSR872BBM	GSE91347	tim-reddy:ctrl_001.t4_rep3_chip_seq_bam	ENCFF971LXG	N/A
ChIP-seq	tim-reddy:ctrl_001.t4	ENCSR872BBM	GSE91347	tim-reddy:ctrl_001.t4_rep3_chip_seq_fastq	ENCFF496CXR	SRR5093160
ChIP-seq	tim-reddy:ctrl_001.t5	ENCSR627RBH	GSE91304	tim-reddy:ctrl_001.t5_rep1_chip_seq_bam	ENCFF290LVR	N/A
ChIP-seq	tim-reddy:ctrl_001.t5	ENCSR627RBH	GSE91304	tim-reddy:ctrl_001.t5_rep1_chip_seq_fastq	ENCFF340EGF	SRR5093035
ChIP-seq	tim-reddy:ctrl_001.t5	ENCSR627RBH	GSE91304	tim-reddy:ctrl_001.t5_rep2_chip_seq_bam	ENCFF087YHX	N/A
ChIP-seq	tim-reddy:ctrl_001.t5	ENCSR627RBH	GSE91304	tim-reddy:ctrl_001.t5_rep2_chip_seq_fastq	ENCFF496ZLN	SRR5093033
ChIP-seq	tim-reddy:ctrl_001.t5	ENCSR627RBH	GSE91304	tim-reddy:ctrl_001.t5_rep3_chip_seq_bam	ENCFF942NAU	N/A
ChIP-seq	tim-reddy:ctrl_001.t5	ENCSR627RBH	GSE91304	tim-reddy:ctrl_001.t5_rep3_chip_seq_fastq	ENCFF404KBB	SRR5093034
ChIP-seq	tim-reddy:ctrl_001.t6	ENCSR887SZF	GSE91349	tim-reddy:ctrl_001.t6_rep1_chip_seq_bam	ENCFF254UMY	N/A
ChIP-seq	tim-reddy:ctrl_001.t6	ENCSR887SZF	GSE91349	tim-reddy:ctrl_001.t6_rep1_chip_seq_fastq	ENCFF880QTM	SRR5093166
ChIP-seq	tim-reddy:ctrl_001.t6	ENCSR887SZF	GSE91349	tim-reddy:ctrl_001.t6_rep2_chip_seq_bam	ENCFF560OIB	N/A
ChIP-seq	tim-reddy:ctrl_001.t6	ENCSR887SZF	GSE91349	tim-reddy:ctrl_001.t6_rep2_chip_seq_fastq	ENCFF036IYU	SRR5093165
ChIP-seq	tim-reddy:ctrl_001.t6	ENCSR887SZF	GSE91349	tim-reddy:ctrl_001.t6_rep3_chip_seq_bam	ENCFF218BXR	N/A
ChIP-seq	tim-reddy:ctrl_001.t6	ENCSR887SZF	GSE91349	tim-reddy:ctrl_001.t6_rep3_chip_seq_fastq	ENCFF269YAY	SRR5093164
ChIP-seq	tim-reddy:ctrl_001.t7	ENCSR317VER	GSE91241	tim-reddy:ctrl_001.t7_rep1_chip_seq_bam	ENCFF089SRL	N/A
ChIP-seq	tim-reddy:ctrl_001.t7	ENCSR317VER	GSE91241	tim-reddy:ctrl_001.t7_rep1_chip_seq_fastq	ENCFF163PSC	SRR5093401
ChIP-seq	tim-reddy:ctrl_001.t7	ENCSR317VER	GSE91241	tim-reddy:ctrl_001.t7_rep2_chip_seq_bam	ENCFF075DHB	N/A
ChIP-seq	tim-reddy:ctrl_001.t7	ENCSR317VER	GSE91241	tim-reddy:ctrl_001.t7_rep2_chip_seq_fastq	ENCFF038ADB	SRR5093400
ChIP-seq	tim-reddy:ctrl_001.t7	ENCSR317VER	GSE91241	tim-reddy:ctrl_001.t7_rep3_chip_seq_bam	ENCFF850HHB	N/A
ChIP-seq	tim-reddy:ctrl_001.t7	ENCSR317VER	GSE91241	tim-reddy:ctrl_001.t7_rep3_chip_seq_fastq	ENCFF634KHZ	SRR5093402
ChIP-seq	tim-reddy:ctrl_001.t8	ENCSR274VPI	GSE91232	tim-reddy:ctrl_001.t8_rep1_chip_seq_bam	ENCFF321UZO	N/A
ChIP-seq	tim-reddy:ctrl_001.t8	ENCSR274VPI	GSE91232	tim-reddy:ctrl_001.t8_rep1_chip_seq_fastq	ENCFF047IPB	SRR5093376
ChIP-seq	tim-reddy:ctrl_001.t8	ENCSR274VPI	GSE91232	tim-reddy:ctrl_001.t8_rep2_chip_seq_bam	ENCFF821WGA	N/A
ChIP-seq	tim-reddy:ctrl_001.t8	ENCSR274VPI	GSE91232	tim-reddy:ctrl_001.t8_rep2_chip_seq_fastq	ENCFF081NZK	SRR5093378
ChIP-seq	tim-reddy:ctrl_001.t8	ENCSR274VPI	GSE91232	tim-reddy:ctrl_001.t8_rep3_chip_seq_bam	ENCFF544LRR	N/A
ChIP-seq	tim-reddy:ctrl_001.t8	ENCSR274VPI	GSE91232	tim-reddy:ctrl_001.t8_rep3_chip_seq_fastq	ENCFF526AVE	SRR5093377
ChIP-seq	tim-reddy:ctrl_002.t00	ENCSR600LQZ	GSE91296	tim-reddy:ctrl_002.t00_rep1_chip_seq_bam	ENCFF801QPB	N/A
ChIP-seq	tim-reddy:ctrl_002.t00	ENCSR600LQZ	GSE91296	tim-reddy:ctrl_002.t00_rep1_chip_seq_fastq	ENCFF044FEJ	SRR5093009
ChIP-seq	tim-reddy:ctrl_002.t00	ENCSR600LQZ	GSE91296	tim-reddy:ctrl_002.t00_rep2_chip_seq_bam	ENCFF395XMG	N/A
ChIP-seq	tim-reddy:ctrl_002.t00	ENCSR600LQZ	GSE91296	tim-reddy:ctrl_002.t00_rep2_chip_seq_fastq	ENCFF199ORG	SRR5093007
ChIP-seq	tim-reddy:ctrl_002.t00	ENCSR600LQZ	GSE91296	tim-reddy:ctrl_002.t00_rep3_chip_seq_bam	ENCFF996NUX	N/A
ChIP-seq	tim-reddy:ctrl_002.t00	ENCSR600LQZ	GSE91296	tim-reddy:ctrl_002.t00_rep3_chip_seq_fastq	ENCFF255TSO	SRR5093008
ChIP-seq	tim-reddy:ctrl_002.t05	ENCSR467GRT	GSE91268	tim-reddy:ctrl_002.t05_rep1_chip_seq_bam	ENCFF316HIV	N/A
ChIP-seq	tim-reddy:ctrl_002.t05	ENCSR467GRT	GSE91268	tim-reddy:ctrl_002.t05_rep1_chip_seq_fastq	ENCFF989IQK	SRR5092921
ChIP-seq	tim-reddy:ctrl_002.t05	ENCSR467GRT	GSE91268	tim-reddy:ctrl_002.t05_rep2_chip_seq_bam	ENCFF791ASI	N/A
ChIP-seq	tim-reddy:ctrl_002.t05	ENCSR467GRT	GSE91268	tim-reddy:ctrl_002.t05_rep2_chip_seq_fastq	ENCFF759SMG	SRR5092920
ChIP-seq	tim-reddy:ctrl_002.t05	ENCSR467GRT	GSE91268	tim-reddy:ctrl_002.t05_rep3_chip_seq_bam	ENCFF922QHU	N/A
ChIP-seq	tim-reddy:ctrl_002.t05	ENCSR467GRT	GSE91268	tim-reddy:ctrl_002.t05_rep3_chip_seq_fastq	ENCFF697YMQ	SRR5092922
ChIP-seq	tim-reddy:ctrl_002.t10	ENCSR649JOE	GSE91310	tim-reddy:ctrl_002.t10_rep1_chip_seq_bam	ENCFF487OFB	N/A
ChIP-seq	tim-reddy:ctrl_002.t10	ENCSR649JOE	GSE91310	tim-reddy:ctrl_002.t10_rep1_chip_seq_fastq	ENCFF758BZX	SRR5093055
ChIP-seq	tim-reddy:ctrl_002.t10	ENCSR649JOE	GSE91310	tim-reddy:ctrl_002.t10_rep2_chip_seq_bam	ENCFF601STA	N/A
ChIP-seq	tim-reddy:ctrl_002.t10	ENCSR649JOE	GSE91310	tim-reddy:ctrl_002.t10_rep2_chip_seq_fastq	ENCFF477SWN	SRR5093054
ChIP-seq	tim-reddy:ctrl_002.t10	ENCSR649JOE	GSE91310	tim-reddy:ctrl_002.t10_rep3_chip_seq_bam	ENCFF416QUO	N/A
ChIP-seq	tim-reddy:ctrl_002.t10	ENCSR649JOE	GSE91310	tim-reddy:ctrl_002.t10_rep3_chip_seq_fastq	ENCFF987WYO	SRR5093053
ChIP-seq	tim-reddy:ctrl_002.t12	ENCSR005CRY	GSE91190	tim-reddy:ctrl_002.t12_rep1_chip_seq_bam	ENCFF636KDT	N/A
ChIP-seq	tim-reddy:ctrl_002.t12	ENCSR005CRY	GSE91190	tim-reddy:ctrl_002.t12_rep1_chip_seq_fastq	ENCFF769JUL	SRR5093244
ChIP-seq	tim-reddy:ctrl_002.t12	ENCSR005CRY	GSE91190	tim-reddy:ctrl_002.t12_rep2_chip_seq_bam	ENCFF242HOG	N/A
ChIP-seq	tim-reddy:ctrl_002.t12	ENCSR005CRY	GSE91190	tim-reddy:ctrl_002.t12_rep2_chip_seq_fastq	ENCFF712VIW	SRR5093242
ChIP-seq	tim-reddy:ctrl_002.t12	ENCSR005CRY	GSE91190	tim-reddy:ctrl_002.t12_rep3_chip_seq_bam	ENCFF853VDT	N/A
ChIP-seq	tim-reddy:ctrl_002.t12	ENCSR005CRY	GSE91190	tim-reddy:ctrl_002.t12_rep3_chip_seq_fastq	ENCFF149USB	SRR5093243
ChIP-seq	tim-reddy:ctrl_002.t1	ENCSR611VYO	GSE91300	tim-reddy:ctrl_002.t1_rep1_chip_seq_bam	ENCFF403EBP	N/A
ChIP-seq	tim-reddy:ctrl_002.t1	ENCSR611VYO	GSE91300	tim-reddy:ctrl_002.t1_rep1_chip_seq_fastq	ENCFF012ZAV	SRR5093012
ChIP-seq	tim-reddy:ctrl_002.t1	ENCSR611VYO	GSE91300	tim-reddy:ctrl_002.t1_rep2_chip_seq_bam	ENCFF711JTY	N/A
ChIP-seq	tim-reddy:ctrl_002.t1	ENCSR611VYO	GSE91300	tim-reddy:ctrl_002.t1_rep2_chip_seq_fastq	ENCFF668GBR	SRR5093010
ChIP-seq	tim-reddy:ctrl_002.t1	ENCSR611VYO	GSE91300	tim-reddy:ctrl_002.t1_rep3_chip_seq_bam	ENCFF271MPT	N/A
ChIP-seq	tim-reddy:ctrl_002.t1	ENCSR611VYO	GSE91300	tim-reddy:ctrl_002.t1_rep3_chip_seq_fastq	ENCFF908JZQ	SRR5093011
ChIP-seq	tim-reddy:ctrl_002.t2	ENCSR147APP	GSE91211	tim-reddy:ctrl_002.t2_rep1_chip_seq_bam	ENCFF632UPH	N/A
ChIP-seq	tim-reddy:ctrl_002.t2	ENCSR147APP	GSE91211	tim-reddy:ctrl_002.t2_rep1_chip_seq_fastq	ENCFF511KUH	SRR5093314
ChIP-seq	tim-reddy:ctrl_002.t2	ENCSR147APP	GSE91211	tim-reddy:ctrl_002.t2_rep2_chip_seq_bam	ENCFF368OTV	N/A
ChIP-seq	tim-reddy:ctrl_002.t2	ENCSR147APP	GSE91211	tim-reddy:ctrl_002.t2_rep2_chip_seq_fastq	ENCFF184AER	SRR5093313
ChIP-seq	tim-reddy:ctrl_002.t2	ENCSR147APP	GSE91211	tim-reddy:ctrl_002.t2_rep3_chip_seq_bam	ENCFF634ULC	N/A
ChIP-seq	tim-reddy:ctrl_002.t2	ENCSR147APP	GSE91211	tim-reddy:ctrl_002.t2_rep3_chip_seq_fastq	ENCFF535VCQ	SRR5093312
ChIP-seq	tim-reddy:ctrl_002.t3	ENCSR711MVL	GSE91325	tim-reddy:ctrl_002.t3_rep1_chip_seq_bam	ENCFF831MPX	N/A
ChIP-seq	tim-reddy:ctrl_002.t3	ENCSR711MVL	GSE91325	tim-reddy:ctrl_002.t3_rep1_chip_seq_fastq	ENCFF296XTO	SRR5093095
ChIP-seq	tim-reddy:ctrl_002.t3	ENCSR711MVL	GSE91325	tim-reddy:ctrl_002.t3_rep2_chip_seq_bam	ENCFF323WQM	N/A
ChIP-seq	tim-reddy:ctrl_002.t3	ENCSR711MVL	GSE91325	tim-reddy:ctrl_002.t3_rep2_chip_seq_fastq	ENCFF748IJX	SRR5093094
ChIP-seq	tim-reddy:ctrl_002.t3	ENCSR711MVL	GSE91325	tim-reddy:ctrl_002.t3_rep3_chip_seq_bam	ENCFF503AJR	N/A
ChIP-seq	tim-reddy:ctrl_002.t3	ENCSR711MVL	GSE91325	tim-reddy:ctrl_002.t3_rep3_chip_seq_fastq	ENCFF868ECK	SRR5093093
ChIP-seq	tim-reddy:ctrl_002.t4	ENCSR690JTW	GSE91321	tim-reddy:ctrl_002.t4_rep1_chip_seq_bam	ENCFF455UAB	N/A
ChIP-seq	tim-reddy:ctrl_002.t4	ENCSR690JTW	GSE91321	tim-reddy:ctrl_002.t4_rep1_chip_seq_fastq	ENCFF583DKO	SRR5093083
ChIP-seq	tim-reddy:ctrl_002.t4	ENCSR690JTW	GSE91321	tim-reddy:ctrl_002.t4_rep2_chip_seq_bam	ENCFF887YTT	N/A
ChIP-seq	tim-reddy:ctrl_002.t4	ENCSR690JTW	GSE91321	tim-reddy:ctrl_002.t4_rep2_chip_seq_fastq	ENCFF991CBW	SRR5093082
ChIP-seq	tim-reddy:ctrl_002.t4	ENCSR690JTW	GSE91321	tim-reddy:ctrl_002.t4_rep3_chip_seq_bam	ENCFF081TBO	N/A
ChIP-seq	tim-reddy:ctrl_002.t4	ENCSR690JTW	GSE91321	tim-reddy:ctrl_002.t4_rep3_chip_seq_fastq	ENCFF472KMS	SRR5093084
ChIP-seq	tim-reddy:ctrl_002.t5	ENCSR730UDX	GSE91329	tim-reddy:ctrl_002.t5_rep1_chip_seq_bam	ENCFF985GWF	N/A
ChIP-seq	tim-reddy:ctrl_002.t5	ENCSR730UDX	GSE91329	tim-reddy:ctrl_002.t5_rep1_chip_seq_fastq	ENCFF690DWP	SRR5093107
ChIP-seq	tim-reddy:ctrl_002.t5	ENCSR730UDX	GSE91329	tim-reddy:ctrl_002.t5_rep2_chip_seq_bam	ENCFF595DRH	N/A
ChIP-seq	tim-reddy:ctrl_002.t5	ENCSR730UDX	GSE91329	tim-reddy:ctrl_002.t5_rep2_chip_seq_fastq	ENCFF569GYV	SRR5093105
ChIP-seq	tim-reddy:ctrl_002.t5	ENCSR730UDX	GSE91329	tim-reddy:ctrl_002.t5_rep3_chip_seq_bam	ENCFF135XUJ	N/A
ChIP-seq	tim-reddy:ctrl_002.t5	ENCSR730UDX	GSE91329	tim-reddy:ctrl_002.t5_rep3_chip_seq_fastq	ENCFF669PIA	SRR5093106
ChIP-seq	tim-reddy:ctrl_002.t6	ENCSR608QCS	GSE91298	tim-reddy:ctrl_002.t6_rep1_chip_seq_bam	ENCFF408NFU	N/A
ChIP-seq	tim-reddy:ctrl_002.t6	ENCSR608QCS	GSE91298	tim-reddy:ctrl_002.t6_rep1_chip_seq_fastq	ENCFF891OIF	SRR5093017
ChIP-seq	tim-reddy:ctrl_002.t6	ENCSR608QCS	GSE91298	tim-reddy:ctrl_002.t6_rep2_chip_seq_bam	ENCFF214UMU	N/A
ChIP-seq	tim-reddy:ctrl_002.t6	ENCSR608QCS	GSE91298	tim-reddy:ctrl_002.t6_rep2_chip_seq_fastq	ENCFF124NIG	SRR5093018
ChIP-seq	tim-reddy:ctrl_002.t6	ENCSR608QCS	GSE91298	tim-reddy:ctrl_002.t6_rep3_chip_seq_bam	ENCFF773DUX	N/A
ChIP-seq	tim-reddy:ctrl_002.t6	ENCSR608QCS	GSE91298	tim-reddy:ctrl_002.t6_rep3_chip_seq_fastq	ENCFF073ZEF	SRR5093016
ChIP-seq	tim-reddy:ctrl_002.t7	ENCSR909GTY	GSE91354	tim-reddy:ctrl_002.t7_rep1_chip_seq_bam	ENCFF049LAK	N/A
ChIP-seq	tim-reddy:ctrl_002.t7	ENCSR909GTY	GSE91354	tim-reddy:ctrl_002.t7_rep1_chip_seq_fastq	ENCFF933AQG	SRR5093180
ChIP-seq	tim-reddy:ctrl_002.t7	ENCSR909GTY	GSE91354	tim-reddy:ctrl_002.t7_rep2_chip_seq_bam	ENCFF969ZZQ	N/A
ChIP-seq	tim-reddy:ctrl_002.t7	ENCSR909GTY	GSE91354	tim-reddy:ctrl_002.t7_rep2_chip_seq_fastq	ENCFF983MUT	SRR5093179
ChIP-seq	tim-reddy:ctrl_002.t7	ENCSR909GTY	GSE91354	tim-reddy:ctrl_002.t7_rep3_chip_seq_bam	ENCFF458HLD	N/A
ChIP-seq	tim-reddy:ctrl_002.t7	ENCSR909GTY	GSE91354	tim-reddy:ctrl_002.t7_rep3_chip_seq_fastq	ENCFF664SQT	SRR5093178
ChIP-seq	tim-reddy:ctrl_002.t8	ENCSR487EUI	GSE91273	tim-reddy:ctrl_002.t8_rep1_chip_seq_bam	ENCFF047BFP	N/A
ChIP-seq	tim-reddy:ctrl_002.t8	ENCSR487EUI	GSE91273	tim-reddy:ctrl_002.t8_rep1_chip_seq_fastq	ENCFF419NQI	SRR5092937
ChIP-seq	tim-reddy:ctrl_002.t8	ENCSR487EUI	GSE91273	tim-reddy:ctrl_002.t8_rep2_chip_seq_bam	ENCFF715QTB	N/A
ChIP-seq	tim-reddy:ctrl_002.t8	ENCSR487EUI	GSE91273	tim-reddy:ctrl_002.t8_rep2_chip_seq_fastq	ENCFF538UDB	SRR5092936
ChIP-seq	tim-reddy:ctrl_002.t8	ENCSR487EUI	GSE91273	tim-reddy:ctrl_002.t8_rep3_chip_seq_bam	ENCFF604AYJ	N/A
ChIP-seq	tim-reddy:ctrl_002.t8	ENCSR487EUI	GSE91273	tim-reddy:ctrl_002.t8_rep3_chip_seq_fastq	ENCFF796UNQ	SRR5092935
ChIP-seq	tim-reddy:ctrl_003.t00	ENCSR139PCE	GSE92787	tim-reddy:ctrl_003.t00_rep1_chip_seq_bam	ENCFF097CSC	N/A
ChIP-seq	tim-reddy:ctrl_003.t00	ENCSR139PCE	GSE92787	tim-reddy:ctrl_003.t00_rep1_chip_seq_fastq	ENCFF105BMZ	SRR5129550
ChIP-seq	tim-reddy:ctrl_003.t00	ENCSR139PCE	GSE92787	tim-reddy:ctrl_003.t00_rep2_chip_seq_bam	ENCFF987XCE	N/A
ChIP-seq	tim-reddy:ctrl_003.t00	ENCSR139PCE	GSE92787	tim-reddy:ctrl_003.t00_rep2_chip_seq_fastq	ENCFF685JOQ	SRR5129548
ChIP-seq	tim-reddy:ctrl_003.t00	ENCSR139PCE	GSE92787	tim-reddy:ctrl_003.t00_rep3_chip_seq_bam	ENCFF653HKQ	N/A
ChIP-seq	tim-reddy:ctrl_003.t00	ENCSR139PCE	GSE92787	tim-reddy:ctrl_003.t00_rep3_chip_seq_fastq	ENCFF538KMT	SRR5129549
ChIP-seq	tim-reddy:ctrl_003.t05	ENCSR216DMN	GSE92790	tim-reddy:ctrl_003.t05_rep1_chip_seq_bam	ENCFF197RCJ	N/A
ChIP-seq	tim-reddy:ctrl_003.t05	ENCSR216DMN	GSE92790	tim-reddy:ctrl_003.t05_rep1_chip_seq_fastq	ENCFF582JMJ	SRR5129593
ChIP-seq	tim-reddy:ctrl_003.t05	ENCSR216DMN	GSE92790	tim-reddy:ctrl_003.t05_rep2_chip_seq_bam	ENCFF125KKU	N/A
ChIP-seq	tim-reddy:ctrl_003.t05	ENCSR216DMN	GSE92790	tim-reddy:ctrl_003.t05_rep2_chip_seq_fastq	ENCFF467EZO	SRR5129591
ChIP-seq	tim-reddy:ctrl_003.t05	ENCSR216DMN	GSE92790	tim-reddy:ctrl_003.t05_rep3_chip_seq_bam	ENCFF694GJB	N/A
ChIP-seq	tim-reddy:ctrl_003.t05	ENCSR216DMN	GSE92790	tim-reddy:ctrl_003.t05_rep3_chip_seq_fastq	ENCFF097YPD	SRR5129592
ChIP-seq	tim-reddy:ctrl_003.t10	ENCSR328BXP	GSE92798	tim-reddy:ctrl_003.t10_rep1_chip_seq_bam	ENCFF211SRS	N/A
ChIP-seq	tim-reddy:ctrl_003.t10	ENCSR328BXP	GSE92798	tim-reddy:ctrl_003.t10_rep1_chip_seq_fastq	ENCFF464RUY	SRR5129626
ChIP-seq	tim-reddy:ctrl_003.t10	ENCSR328BXP	GSE92798	tim-reddy:ctrl_003.t10_rep2_chip_seq_bam	ENCFF069PUL	N/A
ChIP-seq	tim-reddy:ctrl_003.t10	ENCSR328BXP	GSE92798	tim-reddy:ctrl_003.t10_rep2_chip_seq_fastq	ENCFF927VIV	SRR5129625
ChIP-seq	tim-reddy:ctrl_003.t10	ENCSR328BXP	GSE92798	tim-reddy:ctrl_003.t10_rep3_chip_seq_bam	ENCFF782LQS	N/A
ChIP-seq	tim-reddy:ctrl_003.t10	ENCSR328BXP	GSE92798	tim-reddy:ctrl_003.t10_rep3_chip_seq_fastq	ENCFF501PIN	SRR5129627
ChIP-seq	tim-reddy:ctrl_003.t12	ENCSR382EJS	GSE92802	tim-reddy:ctrl_003.t12_rep1_chip_seq_bam	ENCFF043GAS	N/A
ChIP-seq	tim-reddy:ctrl_003.t12	ENCSR382EJS	GSE92802	tim-reddy:ctrl_003.t12_rep1_chip_seq_fastq	ENCFF160BRR	SRR5129562
ChIP-seq	tim-reddy:ctrl_003.t12	ENCSR382EJS	GSE92802	tim-reddy:ctrl_003.t12_rep2_chip_seq_bam	ENCFF046XBU	N/A
ChIP-seq	tim-reddy:ctrl_003.t12	ENCSR382EJS	GSE92802	tim-reddy:ctrl_003.t12_rep2_chip_seq_fastq	ENCFF096EDH	SRR5129561
ChIP-seq	tim-reddy:ctrl_003.t12	ENCSR382EJS	GSE92802	tim-reddy:ctrl_003.t12_rep3_chip_seq_bam	ENCFF175SZI	N/A
ChIP-seq	tim-reddy:ctrl_003.t12	ENCSR382EJS	GSE92802	tim-reddy:ctrl_003.t12_rep3_chip_seq_fastq	ENCFF315QEN	SRR5129560
ChIP-seq	tim-reddy:ctrl_003.t1	ENCSR560DEL	GSE92815	tim-reddy:ctrl_003.t1_rep1_chip_seq_bam	ENCFF639UDD	N/A
ChIP-seq	tim-reddy:ctrl_003.t1	ENCSR560DEL	GSE92815	tim-reddy:ctrl_003.t1_rep1_chip_seq_fastq	ENCFF480QMP	SRR5129589
ChIP-seq	tim-reddy:ctrl_003.t1	ENCSR560DEL	GSE92815	tim-reddy:ctrl_003.t1_rep2_chip_seq_bam	ENCFF222ACA	N/A
ChIP-seq	tim-reddy:ctrl_003.t1	ENCSR560DEL	GSE92815	tim-reddy:ctrl_003.t1_rep2_chip_seq_fastq	ENCFF645DND	SRR5129588
ChIP-seq	tim-reddy:ctrl_003.t1	ENCSR560DEL	GSE92815	tim-reddy:ctrl_003.t1_rep3_chip_seq_bam	ENCFF193ABY	N/A
ChIP-seq	tim-reddy:ctrl_003.t1	ENCSR560DEL	GSE92815	tim-reddy:ctrl_003.t1_rep3_chip_seq_fastq	ENCFF027TUH	SRR5129590
ChIP-seq	tim-reddy:ctrl_003.t2	ENCSR088SOR	GSE92784	tim-reddy:ctrl_003.t2_rep1_chip_seq_bam	ENCFF631DES	N/A
ChIP-seq	tim-reddy:ctrl_003.t2	ENCSR088SOR	GSE92784	tim-reddy:ctrl_003.t2_rep1_chip_seq_fastq	ENCFF973HXW	SRR5129545
ChIP-seq	tim-reddy:ctrl_003.t2	ENCSR088SOR	GSE92784	tim-reddy:ctrl_003.t2_rep2_chip_seq_bam	ENCFF171YYX	N/A
ChIP-seq	tim-reddy:ctrl_003.t2	ENCSR088SOR	GSE92784	tim-reddy:ctrl_003.t2_rep2_chip_seq_fastq	ENCFF762RDU	SRR5129546
ChIP-seq	tim-reddy:ctrl_003.t2	ENCSR088SOR	GSE92784	tim-reddy:ctrl_003.t2_rep3_chip_seq_bam	ENCFF298EPS	N/A
ChIP-seq	tim-reddy:ctrl_003.t2	ENCSR088SOR	GSE92784	tim-reddy:ctrl_003.t2_rep3_chip_seq_fastq	ENCFF448SPI	SRR5129547
ChIP-seq	tim-reddy:ctrl_003.t3	ENCSR266YIS	GSE92795	tim-reddy:ctrl_003.t3_rep1_chip_seq_bam	ENCFF346VSP	N/A
ChIP-seq	tim-reddy:ctrl_003.t3	ENCSR266YIS	GSE92795	tim-reddy:ctrl_003.t3_rep1_chip_seq_fastq	ENCFF132NRG	SRR5129576
ChIP-seq	tim-reddy:ctrl_003.t3	ENCSR266YIS	GSE92795	tim-reddy:ctrl_003.t3_rep2_chip_seq_bam	ENCFF376SOY	N/A
ChIP-seq	tim-reddy:ctrl_003.t3	ENCSR266YIS	GSE92795	tim-reddy:ctrl_003.t3_rep2_chip_seq_fastq	ENCFF803JFA	SRR5129574
ChIP-seq	tim-reddy:ctrl_003.t3	ENCSR266YIS	GSE92795	tim-reddy:ctrl_003.t3_rep3_chip_seq_bam	ENCFF434AIC	N/A
ChIP-seq	tim-reddy:ctrl_003.t3	ENCSR266YIS	GSE92795	tim-reddy:ctrl_003.t3_rep3_chip_seq_fastq	ENCFF215IWI	SRR5129575
ChIP-seq	tim-reddy:ctrl_003.t4	ENCSR748SVE	GSE92824	tim-reddy:ctrl_003.t4_rep1_chip_seq_bam	ENCFF923SPD	N/A
ChIP-seq	tim-reddy:ctrl_003.t4	ENCSR748SVE	GSE92824	tim-reddy:ctrl_003.t4_rep1_chip_seq_fastq	ENCFF846NUD	SRR5129651
ChIP-seq	tim-reddy:ctrl_003.t4	ENCSR748SVE	GSE92824	tim-reddy:ctrl_003.t4_rep2_chip_seq_bam	ENCFF220JWH	N/A
ChIP-seq	tim-reddy:ctrl_003.t4	ENCSR748SVE	GSE92824	tim-reddy:ctrl_003.t4_rep2_chip_seq_fastq	ENCFF113LFE	SRR5129649
ChIP-seq	tim-reddy:ctrl_003.t4	ENCSR748SVE	GSE92824	tim-reddy:ctrl_003.t4_rep3_chip_seq_bam	ENCFF298BPR	N/A
ChIP-seq	tim-reddy:ctrl_003.t4	ENCSR748SVE	GSE92824	tim-reddy:ctrl_003.t4_rep3_chip_seq_fastq	ENCFF417UPA	SRR5129650
ChIP-seq	tim-reddy:ctrl_003.t5	ENCSR565ZHQ	GSE92816	tim-reddy:ctrl_003.t5_rep1_chip_seq_bam	ENCFF876RBI	N/A
ChIP-seq	tim-reddy:ctrl_003.t5	ENCSR565ZHQ	GSE92816	tim-reddy:ctrl_003.t5_rep1_chip_seq_fastq	ENCFF725UCF	SRR5129622
ChIP-seq	tim-reddy:ctrl_003.t5	ENCSR565ZHQ	GSE92816	tim-reddy:ctrl_003.t5_rep2_chip_seq_bam	ENCFF127COG	N/A
ChIP-seq	tim-reddy:ctrl_003.t5	ENCSR565ZHQ	GSE92816	tim-reddy:ctrl_003.t5_rep2_chip_seq_fastq	ENCFF834CAB	SRR5129624
ChIP-seq	tim-reddy:ctrl_003.t5	ENCSR565ZHQ	GSE92816	tim-reddy:ctrl_003.t5_rep3_chip_seq_bam	ENCFF754GCT	N/A
ChIP-seq	tim-reddy:ctrl_003.t5	ENCSR565ZHQ	GSE92816	tim-reddy:ctrl_003.t5_rep3_chip_seq_fastq	ENCFF305ZCK	SRR5129623
ChIP-seq	tim-reddy:ctrl_003.t6	ENCSR366VPA	GSE92801	tim-reddy:ctrl_003.t6_rep1_chip_seq_bam	ENCFF967IGG	N/A
ChIP-seq	tim-reddy:ctrl_003.t6	ENCSR366VPA	GSE92801	tim-reddy:ctrl_003.t6_rep1_chip_seq_fastq	ENCFF347URC	SRR5129565
ChIP-seq	tim-reddy:ctrl_003.t6	ENCSR366VPA	GSE92801	tim-reddy:ctrl_003.t6_rep2_chip_seq_bam	ENCFF239YPJ	N/A
ChIP-seq	tim-reddy:ctrl_003.t6	ENCSR366VPA	GSE92801	tim-reddy:ctrl_003.t6_rep2_chip_seq_fastq	ENCFF238JFM	SRR5129564
ChIP-seq	tim-reddy:ctrl_003.t6	ENCSR366VPA	GSE92801	tim-reddy:ctrl_003.t6_rep3_chip_seq_bam	ENCFF836FDV	N/A
ChIP-seq	tim-reddy:ctrl_003.t6	ENCSR366VPA	GSE92801	tim-reddy:ctrl_003.t6_rep3_chip_seq_fastq	ENCFF593ZTF	SRR5129563
ChIP-seq	tim-reddy:ctrl_003.t7	ENCSR701MJQ	GSE92822	tim-reddy:ctrl_003.t7_rep1_chip_seq_bam	ENCFF018IPS	N/A
ChIP-seq	tim-reddy:ctrl_003.t7	ENCSR701MJQ	GSE92822	tim-reddy:ctrl_003.t7_rep1_chip_seq_fastq	ENCFF488PAK	SRR5129656
ChIP-seq	tim-reddy:ctrl_003.t7	ENCSR701MJQ	GSE92822	tim-reddy:ctrl_003.t7_rep2_chip_seq_bam	ENCFF279HUL	N/A
ChIP-seq	tim-reddy:ctrl_003.t7	ENCSR701MJQ	GSE92822	tim-reddy:ctrl_003.t7_rep2_chip_seq_fastq	ENCFF943LBG	SRR5129654
ChIP-seq	tim-reddy:ctrl_003.t7	ENCSR701MJQ	GSE92822	tim-reddy:ctrl_003.t7_rep3_chip_seq_bam	ENCFF782EQG	N/A
ChIP-seq	tim-reddy:ctrl_003.t7	ENCSR701MJQ	GSE92822	tim-reddy:ctrl_003.t7_rep3_chip_seq_fastq	ENCFF299KOY	SRR5129655
ChIP-seq	tim-reddy:ctrl_003.t8	ENCSR233BJW	GSE92792	tim-reddy:ctrl_003.t8_rep1_chip_seq_bam	ENCFF843LAV	N/A
ChIP-seq	tim-reddy:ctrl_003.t8	ENCSR233BJW	GSE92792	tim-reddy:ctrl_003.t8_rep1_chip_seq_fastq	ENCFF527ZVN	SRR5129558
ChIP-seq	tim-reddy:ctrl_003.t8	ENCSR233BJW	GSE92792	tim-reddy:ctrl_003.t8_rep2_chip_seq_bam	ENCFF865ZMH	N/A
ChIP-seq	tim-reddy:ctrl_003.t8	ENCSR233BJW	GSE92792	tim-reddy:ctrl_003.t8_rep2_chip_seq_fastq	ENCFF640YYD	SRR5129559
ChIP-seq	tim-reddy:ctrl_003.t8	ENCSR233BJW	GSE92792	tim-reddy:ctrl_003.t8_rep3_chip_seq_bam	ENCFF676EAJ	N/A
ChIP-seq	tim-reddy:ctrl_003.t8	ENCSR233BJW	GSE92792	tim-reddy:ctrl_003.t8_rep3_chip_seq_fastq	ENCFF518AZC	SRR5129557
ChIP-seq	tim-reddy:EP300.t00	ENCSR686BQM	GSE91317	tim-reddy:EP300.t00_rep1_chip_seq_bam	ENCFF859CJY	N/A
ChIP-seq	tim-reddy:EP300.t00	ENCSR686BQM	GSE91317	tim-reddy:EP300.t00_rep1_chip_seq_bigWig	ENCFF491KLK	N/A
ChIP-seq	tim-reddy:EP300.t00	ENCSR686BQM	GSE91317	tim-reddy:EP300.t00_rep1_chip_seq_fastq	ENCFF315LRA	SRR5093074
ChIP-seq	tim-reddy:EP300.t00	ENCSR686BQM	GSE91317	tim-reddy:EP300.t00_rep1_chip_seq_narrowPeak	ENCFF566QNB	N/A
ChIP-seq	tim-reddy:EP300.t00	ENCSR686BQM	GSE91317	tim-reddy:EP300.t00_rep2_chip_seq_bam	ENCFF090FBN	N/A
ChIP-seq	tim-reddy:EP300.t00	ENCSR686BQM	GSE91317	tim-reddy:EP300.t00_rep2_chip_seq_bigWig	ENCFF196RLX	N/A
ChIP-seq	tim-reddy:EP300.t00	ENCSR686BQM	GSE91317	tim-reddy:EP300.t00_rep2_chip_seq_fastq	ENCFF986SHG	SRR5093072
ChIP-seq	tim-reddy:EP300.t00	ENCSR686BQM	GSE91317	tim-reddy:EP300.t00_rep2_chip_seq_narrowPeak	ENCFF197OIA	N/A
ChIP-seq	tim-reddy:EP300.t00	ENCSR686BQM	GSE91317	tim-reddy:EP300.t00_rep3_chip_seq_bam	ENCFF139LRZ	N/A
ChIP-seq	tim-reddy:EP300.t00	ENCSR686BQM	GSE91317	tim-reddy:EP300.t00_rep3_chip_seq_bigWig	ENCFF690HWM	N/A
ChIP-seq	tim-reddy:EP300.t00	ENCSR686BQM	GSE91317	tim-reddy:EP300.t00_rep3_chip_seq_fastq	ENCFF746GRI	SRR5093073
ChIP-seq	tim-reddy:EP300.t00	ENCSR686BQM	GSE91317	tim-reddy:EP300.t00_rep3_chip_seq_narrowPeak	ENCFF464IHD	N/A
ChIP-seq	tim-reddy:EP300.t05	ENCSR260WCE	GSE91230	tim-reddy:EP300.t05_rep1_chip_seq_bam	ENCFF038QSX	N/A
ChIP-seq	tim-reddy:EP300.t05	ENCSR260WCE	GSE91230	tim-reddy:EP300.t05_rep1_chip_seq_bigWig	ENCFF418EFG	N/A
ChIP-seq	tim-reddy:EP300.t05	ENCSR260WCE	GSE91230	tim-reddy:EP300.t05_rep1_chip_seq_fastq	ENCFF529VKH	SRR5093372
ChIP-seq	tim-reddy:EP300.t05	ENCSR260WCE	GSE91230	tim-reddy:EP300.t05_rep1_chip_seq_narrowPeak	ENCFF021MMH	N/A
ChIP-seq	tim-reddy:EP300.t05	ENCSR260WCE	GSE91230	tim-reddy:EP300.t05_rep2_chip_seq_bam	ENCFF913FOB	N/A
ChIP-seq	tim-reddy:EP300.t05	ENCSR260WCE	GSE91230	tim-reddy:EP300.t05_rep2_chip_seq_bigWig	ENCFF764PSQ	N/A
ChIP-seq	tim-reddy:EP300.t05	ENCSR260WCE	GSE91230	tim-reddy:EP300.t05_rep2_chip_seq_fastq	ENCFF385BFU	SRR5093371
ChIP-seq	tim-reddy:EP300.t05	ENCSR260WCE	GSE91230	tim-reddy:EP300.t05_rep2_chip_seq_narrowPeak	ENCFF398TNK	N/A
ChIP-seq	tim-reddy:EP300.t05	ENCSR260WCE	GSE91230	tim-reddy:EP300.t05_rep3_chip_seq_bam	ENCFF517SGK	N/A
ChIP-seq	tim-reddy:EP300.t05	ENCSR260WCE	GSE91230	tim-reddy:EP300.t05_rep3_chip_seq_bigWig	ENCFF892SPY	N/A
ChIP-seq	tim-reddy:EP300.t05	ENCSR260WCE	GSE91230	tim-reddy:EP300.t05_rep3_chip_seq_fastq	ENCFF723CDI	SRR5093370
ChIP-seq	tim-reddy:EP300.t05	ENCSR260WCE	GSE91230	tim-reddy:EP300.t05_rep3_chip_seq_narrowPeak	ENCFF860PDI	N/A
ChIP-seq	tim-reddy:EP300.t10	ENCSR792VMN	GSE91339	tim-reddy:EP300.t10_rep1_chip_seq_bam	ENCFF125MBG	N/A
ChIP-seq	tim-reddy:EP300.t10	ENCSR792VMN	GSE91339	tim-reddy:EP300.t10_rep1_chip_seq_bigWig	ENCFF499JLK	N/A
ChIP-seq	tim-reddy:EP300.t10	ENCSR792VMN	GSE91339	tim-reddy:EP300.t10_rep1_chip_seq_fastq	ENCFF696QIF	SRR5093136
ChIP-seq	tim-reddy:EP300.t10	ENCSR792VMN	GSE91339	tim-reddy:EP300.t10_rep1_chip_seq_narrowPeak	ENCFF807NLJ	N/A
ChIP-seq	tim-reddy:EP300.t10	ENCSR792VMN	GSE91339	tim-reddy:EP300.t10_rep3_chip_seq_bam	ENCFF579ORJ	N/A
ChIP-seq	tim-reddy:EP300.t10	ENCSR792VMN	GSE91339	tim-reddy:EP300.t10_rep3_chip_seq_bigWig	ENCFF255NKB	N/A
ChIP-seq	tim-reddy:EP300.t10	ENCSR792VMN	GSE91339	tim-reddy:EP300.t10_rep3_chip_seq_fastq	ENCFF954EDE	SRR5093135
ChIP-seq	tim-reddy:EP300.t10	ENCSR792VMN	GSE91339	tim-reddy:EP300.t10_rep3_chip_seq_narrowPeak	ENCFF408RDZ	N/A
ChIP-seq	tim-reddy:EP300.t12	ENCSR124VXG	GSE91205	tim-reddy:EP300.t12_rep1_chip_seq_bam	ENCFF868IEG	N/A
ChIP-seq	tim-reddy:EP300.t12	ENCSR124VXG	GSE91205	tim-reddy:EP300.t12_rep1_chip_seq_bigWig	ENCFF892SKA	N/A
ChIP-seq	tim-reddy:EP300.t12	ENCSR124VXG	GSE91205	tim-reddy:EP300.t12_rep1_chip_seq_fastq	ENCFF068NEI	SRR5093290
ChIP-seq	tim-reddy:EP300.t12	ENCSR124VXG	GSE91205	tim-reddy:EP300.t12_rep1_chip_seq_narrowPeak	ENCFF438LIB	N/A
ChIP-seq	tim-reddy:EP300.t12	ENCSR124VXG	GSE91205	tim-reddy:EP300.t12_rep2_chip_seq_bam	ENCFF402OMZ	N/A
ChIP-seq	tim-reddy:EP300.t12	ENCSR124VXG	GSE91205	tim-reddy:EP300.t12_rep2_chip_seq_bigWig	ENCFF773FLR	N/A
ChIP-seq	tim-reddy:EP300.t12	ENCSR124VXG	GSE91205	tim-reddy:EP300.t12_rep2_chip_seq_fastq	ENCFF393JGE	SRR5093291
ChIP-seq	tim-reddy:EP300.t12	ENCSR124VXG	GSE91205	tim-reddy:EP300.t12_rep2_chip_seq_narrowPeak	ENCFF956UIZ	N/A
ChIP-seq	tim-reddy:EP300.t12	ENCSR124VXG	GSE91205	tim-reddy:EP300.t12_rep3_chip_seq_bam	ENCFF963FPY	N/A
ChIP-seq	tim-reddy:EP300.t12	ENCSR124VXG	GSE91205	tim-reddy:EP300.t12_rep3_chip_seq_bigWig	ENCFF177LVC	N/A
ChIP-seq	tim-reddy:EP300.t12	ENCSR124VXG	GSE91205	tim-reddy:EP300.t12_rep3_chip_seq_fastq	ENCFF567ISB	SRR5093289
ChIP-seq	tim-reddy:EP300.t12	ENCSR124VXG	GSE91205	tim-reddy:EP300.t12_rep3_chip_seq_narrowPeak	ENCFF863ZVY	N/A
ChIP-seq	tim-reddy:EP300.t1	ENCSR358ELZ	GSE91251	tim-reddy:EP300.t1_rep1_chip_seq_bam	ENCFF074CYV	N/A
ChIP-seq	tim-reddy:EP300.t1	ENCSR358ELZ	GSE91251	tim-reddy:EP300.t1_rep1_chip_seq_bigWig	ENCFF101RWI	N/A
ChIP-seq	tim-reddy:EP300.t1	ENCSR358ELZ	GSE91251	tim-reddy:EP300.t1_rep1_chip_seq_fastq	ENCFF922NFJ	SRR5093438
ChIP-seq	tim-reddy:EP300.t1	ENCSR358ELZ	GSE91251	tim-reddy:EP300.t1_rep1_chip_seq_narrowPeak	ENCFF774PLX	N/A
ChIP-seq	tim-reddy:EP300.t1	ENCSR358ELZ	GSE91251	tim-reddy:EP300.t1_rep3_chip_seq_bam	ENCFF864XTU	N/A
ChIP-seq	tim-reddy:EP300.t1	ENCSR358ELZ	GSE91251	tim-reddy:EP300.t1_rep3_chip_seq_bigWig	ENCFF573LMF	N/A
ChIP-seq	tim-reddy:EP300.t1	ENCSR358ELZ	GSE91251	tim-reddy:EP300.t1_rep3_chip_seq_fastq	ENCFF950LBR	SRR5093437
ChIP-seq	tim-reddy:EP300.t1	ENCSR358ELZ	GSE91251	tim-reddy:EP300.t1_rep3_chip_seq_narrowPeak	ENCFF590OLF	N/A
ChIP-seq	tim-reddy:EP300.t2	ENCSR770OTI	GSE91332	tim-reddy:EP300.t2_rep1_chip_seq_bam	ENCFF592QBB	N/A
ChIP-seq	tim-reddy:EP300.t2	ENCSR770OTI	GSE91332	tim-reddy:EP300.t2_rep1_chip_seq_bigWig	ENCFF751RQI	N/A
ChIP-seq	tim-reddy:EP300.t2	ENCSR770OTI	GSE91332	tim-reddy:EP300.t2_rep1_chip_seq_fastq	ENCFF466JAI	SRR5093115
ChIP-seq	tim-reddy:EP300.t2	ENCSR770OTI	GSE91332	tim-reddy:EP300.t2_rep1_chip_seq_narrowPeak	ENCFF064PJU	N/A
ChIP-seq	tim-reddy:EP300.t2	ENCSR770OTI	GSE91332	tim-reddy:EP300.t2_rep2_chip_seq_bam	ENCFF760FLY	N/A
ChIP-seq	tim-reddy:EP300.t2	ENCSR770OTI	GSE91332	tim-reddy:EP300.t2_rep2_chip_seq_bigWig	ENCFF643SDB	N/A
ChIP-seq	tim-reddy:EP300.t2	ENCSR770OTI	GSE91332	tim-reddy:EP300.t2_rep2_chip_seq_fastq	ENCFF938BIY	SRR5093114
ChIP-seq	tim-reddy:EP300.t2	ENCSR770OTI	GSE91332	tim-reddy:EP300.t2_rep2_chip_seq_narrowPeak	ENCFF762WES	N/A
ChIP-seq	tim-reddy:EP300.t2	ENCSR770OTI	GSE91332	tim-reddy:EP300.t2_rep3_chip_seq_bam	ENCFF228EDI	N/A
ChIP-seq	tim-reddy:EP300.t2	ENCSR770OTI	GSE91332	tim-reddy:EP300.t2_rep3_chip_seq_bigWig	ENCFF543DEA	N/A
ChIP-seq	tim-reddy:EP300.t2	ENCSR770OTI	GSE91332	tim-reddy:EP300.t2_rep3_chip_seq_fastq	ENCFF427TAL	SRR5093116
ChIP-seq	tim-reddy:EP300.t2	ENCSR770OTI	GSE91332	tim-reddy:EP300.t2_rep3_chip_seq_narrowPeak	ENCFF378TQR	N/A
ChIP-seq	tim-reddy:EP300.t3	ENCSR047EVQ	GSE91196	tim-reddy:EP300.t3_rep1_chip_seq_bam	ENCFF343FZY	N/A
ChIP-seq	tim-reddy:EP300.t3	ENCSR047EVQ	GSE91196	tim-reddy:EP300.t3_rep1_chip_seq_bigWig	ENCFF232LPX	N/A
ChIP-seq	tim-reddy:EP300.t3	ENCSR047EVQ	GSE91196	tim-reddy:EP300.t3_rep1_chip_seq_fastq	ENCFF391QHP	SRR5093255
ChIP-seq	tim-reddy:EP300.t3	ENCSR047EVQ	GSE91196	tim-reddy:EP300.t3_rep1_chip_seq_narrowPeak	ENCFF263SCM	N/A
ChIP-seq	tim-reddy:EP300.t3	ENCSR047EVQ	GSE91196	tim-reddy:EP300.t3_rep2_chip_seq_bam	ENCFF985MNC	N/A
ChIP-seq	tim-reddy:EP300.t3	ENCSR047EVQ	GSE91196	tim-reddy:EP300.t3_rep2_chip_seq_bigWig	ENCFF646SCS	N/A
ChIP-seq	tim-reddy:EP300.t3	ENCSR047EVQ	GSE91196	tim-reddy:EP300.t3_rep2_chip_seq_fastq	ENCFF802DLN	SRR5093254
ChIP-seq	tim-reddy:EP300.t3	ENCSR047EVQ	GSE91196	tim-reddy:EP300.t3_rep2_chip_seq_narrowPeak	ENCFF530FRE	N/A
ChIP-seq	tim-reddy:EP300.t4	ENCSR145YCX	GSE91210	tim-reddy:EP300.t4_rep1_chip_seq_bam	ENCFF366BFI	N/A
ChIP-seq	tim-reddy:EP300.t4	ENCSR145YCX	GSE91210	tim-reddy:EP300.t4_rep1_chip_seq_bigWig	ENCFF848RPR	N/A
ChIP-seq	tim-reddy:EP300.t4	ENCSR145YCX	GSE91210	tim-reddy:EP300.t4_rep1_chip_seq_fastq	ENCFF425YCS	SRR5093305
ChIP-seq	tim-reddy:EP300.t4	ENCSR145YCX	GSE91210	tim-reddy:EP300.t4_rep1_chip_seq_narrowPeak	ENCFF528WQT	N/A
ChIP-seq	tim-reddy:EP300.t4	ENCSR145YCX	GSE91210	tim-reddy:EP300.t4_rep2_chip_seq_bam	ENCFF951MOH	N/A
ChIP-seq	tim-reddy:EP300.t4	ENCSR145YCX	GSE91210	tim-reddy:EP300.t4_rep2_chip_seq_bigWig	ENCFF216WWO	N/A
ChIP-seq	tim-reddy:EP300.t4	ENCSR145YCX	GSE91210	tim-reddy:EP300.t4_rep2_chip_seq_fastq	ENCFF010TGP	SRR5093306
ChIP-seq	tim-reddy:EP300.t4	ENCSR145YCX	GSE91210	tim-reddy:EP300.t4_rep2_chip_seq_narrowPeak	ENCFF400CPP	N/A
ChIP-seq	tim-reddy:EP300.t5	ENCSR610RKF	GSE91299	tim-reddy:EP300.t5_rep1_chip_seq_bam	ENCFF507PNL	N/A
ChIP-seq	tim-reddy:EP300.t5	ENCSR610RKF	GSE91299	tim-reddy:EP300.t5_rep1_chip_seq_bigWig	ENCFF028JFF	N/A
ChIP-seq	tim-reddy:EP300.t5	ENCSR610RKF	GSE91299	tim-reddy:EP300.t5_rep1_chip_seq_fastq	ENCFF192EWP	SRR5093015
ChIP-seq	tim-reddy:EP300.t5	ENCSR610RKF	GSE91299	tim-reddy:EP300.t5_rep1_chip_seq_narrowPeak	ENCFF891WYF	N/A
ChIP-seq	tim-reddy:EP300.t5	ENCSR610RKF	GSE91299	tim-reddy:EP300.t5_rep2_chip_seq_bam	ENCFF706FEI	N/A
ChIP-seq	tim-reddy:EP300.t5	ENCSR610RKF	GSE91299	tim-reddy:EP300.t5_rep2_chip_seq_bigWig	ENCFF992TSS	N/A
ChIP-seq	tim-reddy:EP300.t5	ENCSR610RKF	GSE91299	tim-reddy:EP300.t5_rep2_chip_seq_fastq	ENCFF685TOJ	SRR5093013
ChIP-seq	tim-reddy:EP300.t5	ENCSR610RKF	GSE91299	tim-reddy:EP300.t5_rep2_chip_seq_narrowPeak	ENCFF598IVG	N/A
ChIP-seq	tim-reddy:EP300.t5	ENCSR610RKF	GSE91299	tim-reddy:EP300.t5_rep3_chip_seq_bam	ENCFF173ELU	N/A
ChIP-seq	tim-reddy:EP300.t5	ENCSR610RKF	GSE91299	tim-reddy:EP300.t5_rep3_chip_seq_bigWig	ENCFF852JEQ	N/A
ChIP-seq	tim-reddy:EP300.t5	ENCSR610RKF	GSE91299	tim-reddy:EP300.t5_rep3_chip_seq_fastq	ENCFF860OTI	SRR5093014
ChIP-seq	tim-reddy:EP300.t5	ENCSR610RKF	GSE91299	tim-reddy:EP300.t5_rep3_chip_seq_narrowPeak	ENCFF368WSX	N/A
ChIP-seq	tim-reddy:EP300.t6	ENCSR841ASB	GSE91344	tim-reddy:EP300.t6_rep1_chip_seq_bam	ENCFF362UMU	N/A
ChIP-seq	tim-reddy:EP300.t6	ENCSR841ASB	GSE91344	tim-reddy:EP300.t6_rep1_chip_seq_bigWig	ENCFF102PMZ	N/A
ChIP-seq	tim-reddy:EP300.t6	ENCSR841ASB	GSE91344	tim-reddy:EP300.t6_rep1_chip_seq_fastq	ENCFF960UYX	SRR5093149
ChIP-seq	tim-reddy:EP300.t6	ENCSR841ASB	GSE91344	tim-reddy:EP300.t6_rep1_chip_seq_narrowPeak	ENCFF847RAC	N/A
ChIP-seq	tim-reddy:EP300.t6	ENCSR841ASB	GSE91344	tim-reddy:EP300.t6_rep2_chip_seq_bam	ENCFF601IPW	N/A
ChIP-seq	tim-reddy:EP300.t6	ENCSR841ASB	GSE91344	tim-reddy:EP300.t6_rep2_chip_seq_bigWig	ENCFF695EUC	N/A
ChIP-seq	tim-reddy:EP300.t6	ENCSR841ASB	GSE91344	tim-reddy:EP300.t6_rep2_chip_seq_fastq	ENCFF885WOA	SRR5093150
ChIP-seq	tim-reddy:EP300.t6	ENCSR841ASB	GSE91344	tim-reddy:EP300.t6_rep2_chip_seq_narrowPeak	ENCFF969DDL	N/A
ChIP-seq	tim-reddy:EP300.t6	ENCSR841ASB	GSE91344	tim-reddy:EP300.t6_rep3_chip_seq_bam	ENCFF752FYN	N/A
ChIP-seq	tim-reddy:EP300.t6	ENCSR841ASB	GSE91344	tim-reddy:EP300.t6_rep3_chip_seq_bigWig	ENCFF156YDN	N/A
ChIP-seq	tim-reddy:EP300.t6	ENCSR841ASB	GSE91344	tim-reddy:EP300.t6_rep3_chip_seq_fastq	ENCFF148LUQ	SRR5093151
ChIP-seq	tim-reddy:EP300.t6	ENCSR841ASB	GSE91344	tim-reddy:EP300.t6_rep3_chip_seq_narrowPeak	ENCFF259DBI	N/A
ChIP-seq	tim-reddy:EP300.t7	ENCSR467VXG	GSE91269	tim-reddy:EP300.t7_rep1_chip_seq_bam	ENCFF200SGY	N/A
ChIP-seq	tim-reddy:EP300.t7	ENCSR467VXG	GSE91269	tim-reddy:EP300.t7_rep1_chip_seq_bigWig	ENCFF978ESB	N/A
ChIP-seq	tim-reddy:EP300.t7	ENCSR467VXG	GSE91269	tim-reddy:EP300.t7_rep1_chip_seq_fastq	ENCFF032URE	SRR5092927
ChIP-seq	tim-reddy:EP300.t7	ENCSR467VXG	GSE91269	tim-reddy:EP300.t7_rep1_chip_seq_narrowPeak	ENCFF213NHH	N/A
ChIP-seq	tim-reddy:EP300.t7	ENCSR467VXG	GSE91269	tim-reddy:EP300.t7_rep2_chip_seq_bam	ENCFF374LBM	N/A
ChIP-seq	tim-reddy:EP300.t7	ENCSR467VXG	GSE91269	tim-reddy:EP300.t7_rep2_chip_seq_bigWig	ENCFF004EEB	N/A
ChIP-seq	tim-reddy:EP300.t7	ENCSR467VXG	GSE91269	tim-reddy:EP300.t7_rep2_chip_seq_fastq	ENCFF963TSB	SRR5092925
ChIP-seq	tim-reddy:EP300.t7	ENCSR467VXG	GSE91269	tim-reddy:EP300.t7_rep2_chip_seq_narrowPeak	ENCFF047KEB	N/A
ChIP-seq	tim-reddy:EP300.t7	ENCSR467VXG	GSE91269	tim-reddy:EP300.t7_rep3_chip_seq_bam	ENCFF620AGM	N/A
ChIP-seq	tim-reddy:EP300.t7	ENCSR467VXG	GSE91269	tim-reddy:EP300.t7_rep3_chip_seq_bigWig	ENCFF990TRR	N/A
ChIP-seq	tim-reddy:EP300.t7	ENCSR467VXG	GSE91269	tim-reddy:EP300.t7_rep3_chip_seq_fastq	ENCFF565AAM	SRR5092926
ChIP-seq	tim-reddy:EP300.t7	ENCSR467VXG	GSE91269	tim-reddy:EP300.t7_rep3_chip_seq_narrowPeak	ENCFF213SAS	N/A
ChIP-seq	tim-reddy:EP300.t8	ENCSR561ZRE	GSE91289	tim-reddy:EP300.t8_rep1_chip_seq_bam	ENCFF631MTC	N/A
ChIP-seq	tim-reddy:EP300.t8	ENCSR561ZRE	GSE91289	tim-reddy:EP300.t8_rep1_chip_seq_bigWig	ENCFF355JYF	N/A
ChIP-seq	tim-reddy:EP300.t8	ENCSR561ZRE	GSE91289	tim-reddy:EP300.t8_rep1_chip_seq_fastq	ENCFF846TQW	SRR5092987
ChIP-seq	tim-reddy:EP300.t8	ENCSR561ZRE	GSE91289	tim-reddy:EP300.t8_rep1_chip_seq_narrowPeak	ENCFF531YCR	N/A
ChIP-seq	tim-reddy:EP300.t8	ENCSR561ZRE	GSE91289	tim-reddy:EP300.t8_rep2_chip_seq_bam	ENCFF124CKL	N/A
ChIP-seq	tim-reddy:EP300.t8	ENCSR561ZRE	GSE91289	tim-reddy:EP300.t8_rep2_chip_seq_bigWig	ENCFF061DPS	N/A
ChIP-seq	tim-reddy:EP300.t8	ENCSR561ZRE	GSE91289	tim-reddy:EP300.t8_rep2_chip_seq_fastq	ENCFF700FUL	SRR5092985
ChIP-seq	tim-reddy:EP300.t8	ENCSR561ZRE	GSE91289	tim-reddy:EP300.t8_rep2_chip_seq_narrowPeak	ENCFF851GQY	N/A
ChIP-seq	tim-reddy:EP300.t8	ENCSR561ZRE	GSE91289	tim-reddy:EP300.t8_rep3_chip_seq_bam	ENCFF775GEU	N/A
ChIP-seq	tim-reddy:EP300.t8	ENCSR561ZRE	GSE91289	tim-reddy:EP300.t8_rep3_chip_seq_bigWig	ENCFF882LWT	N/A
ChIP-seq	tim-reddy:EP300.t8	ENCSR561ZRE	GSE91289	tim-reddy:EP300.t8_rep3_chip_seq_fastq	ENCFF786QFD	SRR5092986
ChIP-seq	tim-reddy:EP300.t8	ENCSR561ZRE	GSE91289	tim-reddy:EP300.t8_rep3_chip_seq_narrowPeak	ENCFF361NDE	N/A
ChIP-seq	tim-reddy:FOSL2.t00	ENCSR593DGU	GSE91293	tim-reddy:FOSL2.t00_rep1_chip_seq_bam	ENCFF838LUM	N/A
ChIP-seq	tim-reddy:FOSL2.t00	ENCSR593DGU	GSE91293	tim-reddy:FOSL2.t00_rep1_chip_seq_bigWig	ENCFF178HAA	N/A
ChIP-seq	tim-reddy:FOSL2.t00	ENCSR593DGU	GSE91293	tim-reddy:FOSL2.t00_rep1_chip_seq_fastq	ENCFF441PAS	SRR5092995
ChIP-seq	tim-reddy:FOSL2.t00	ENCSR593DGU	GSE91293	tim-reddy:FOSL2.t00_rep1_chip_seq_narrowPeak	ENCFF839UTU	N/A
ChIP-seq	tim-reddy:FOSL2.t00	ENCSR593DGU	GSE91293	tim-reddy:FOSL2.t00_rep2_chip_seq_bam	ENCFF931GUX	N/A
ChIP-seq	tim-reddy:FOSL2.t00	ENCSR593DGU	GSE91293	tim-reddy:FOSL2.t00_rep2_chip_seq_bigWig	ENCFF485GUN	N/A
ChIP-seq	tim-reddy:FOSL2.t00	ENCSR593DGU	GSE91293	tim-reddy:FOSL2.t00_rep2_chip_seq_fastq	ENCFF452QZE	SRR5092996
ChIP-seq	tim-reddy:FOSL2.t00	ENCSR593DGU	GSE91293	tim-reddy:FOSL2.t00_rep2_chip_seq_narrowPeak	ENCFF282PSU	N/A
ChIP-seq	tim-reddy:FOSL2.t05	ENCSR775UFR	GSE91336	tim-reddy:FOSL2.t05_rep1_chip_seq_bam	ENCFF429MUQ	N/A
ChIP-seq	tim-reddy:FOSL2.t05	ENCSR775UFR	GSE91336	tim-reddy:FOSL2.t05_rep1_chip_seq_bigWig	ENCFF671FBX	N/A
ChIP-seq	tim-reddy:FOSL2.t05	ENCSR775UFR	GSE91336	tim-reddy:FOSL2.t05_rep1_chip_seq_fastq	ENCFF409BUY	SRR5093127
ChIP-seq	tim-reddy:FOSL2.t05	ENCSR775UFR	GSE91336	tim-reddy:FOSL2.t05_rep1_chip_seq_narrowPeak	ENCFF990BGS	N/A
ChIP-seq	tim-reddy:FOSL2.t05	ENCSR775UFR	GSE91336	tim-reddy:FOSL2.t05_rep2_chip_seq_bam	ENCFF083IYV	N/A
ChIP-seq	tim-reddy:FOSL2.t05	ENCSR775UFR	GSE91336	tim-reddy:FOSL2.t05_rep2_chip_seq_bigWig	ENCFF485BND	N/A
ChIP-seq	tim-reddy:FOSL2.t05	ENCSR775UFR	GSE91336	tim-reddy:FOSL2.t05_rep2_chip_seq_fastq	ENCFF031TGN	SRR5093128
ChIP-seq	tim-reddy:FOSL2.t05	ENCSR775UFR	GSE91336	tim-reddy:FOSL2.t05_rep2_chip_seq_narrowPeak	ENCFF285OFX	N/A
ChIP-seq	tim-reddy:FOSL2.t05	ENCSR775UFR	GSE91336	tim-reddy:FOSL2.t05_rep3_chip_seq_bam	ENCFF265ULV	N/A
ChIP-seq	tim-reddy:FOSL2.t05	ENCSR775UFR	GSE91336	tim-reddy:FOSL2.t05_rep3_chip_seq_bigWig	ENCFF061WFW	N/A
ChIP-seq	tim-reddy:FOSL2.t05	ENCSR775UFR	GSE91336	tim-reddy:FOSL2.t05_rep3_chip_seq_fastq	ENCFF210LGY	SRR5093126
ChIP-seq	tim-reddy:FOSL2.t05	ENCSR775UFR	GSE91336	tim-reddy:FOSL2.t05_rep3_chip_seq_narrowPeak	ENCFF559MHH	N/A
ChIP-seq	tim-reddy:FOSL2.t10	ENCSR563GCV	GSE91290	tim-reddy:FOSL2.t10_rep1_chip_seq_bam	ENCFF227MNI	N/A
ChIP-seq	tim-reddy:FOSL2.t10	ENCSR563GCV	GSE91290	tim-reddy:FOSL2.t10_rep1_chip_seq_bigWig	ENCFF170KOS	N/A
ChIP-seq	tim-reddy:FOSL2.t10	ENCSR563GCV	GSE91290	tim-reddy:FOSL2.t10_rep1_chip_seq_fastq	ENCFF135DKI	SRR5092989
ChIP-seq	tim-reddy:FOSL2.t10	ENCSR563GCV	GSE91290	tim-reddy:FOSL2.t10_rep1_chip_seq_narrowPeak	ENCFF029BKQ	N/A
ChIP-seq	tim-reddy:FOSL2.t10	ENCSR563GCV	GSE91290	tim-reddy:FOSL2.t10_rep2_chip_seq_bam	ENCFF421WVV	N/A
ChIP-seq	tim-reddy:FOSL2.t10	ENCSR563GCV	GSE91290	tim-reddy:FOSL2.t10_rep2_chip_seq_bigWig	ENCFF144LSM	N/A
ChIP-seq	tim-reddy:FOSL2.t10	ENCSR563GCV	GSE91290	tim-reddy:FOSL2.t10_rep2_chip_seq_fastq	ENCFF695MVR	SRR5092988
ChIP-seq	tim-reddy:FOSL2.t10	ENCSR563GCV	GSE91290	tim-reddy:FOSL2.t10_rep2_chip_seq_narrowPeak	ENCFF067LZK	N/A
ChIP-seq	tim-reddy:FOSL2.t10	ENCSR563GCV	GSE91290	tim-reddy:FOSL2.t10_rep3_chip_seq_bam	ENCFF929RSI	N/A
ChIP-seq	tim-reddy:FOSL2.t10	ENCSR563GCV	GSE91290	tim-reddy:FOSL2.t10_rep3_chip_seq_bigWig	ENCFF991YBX	N/A
ChIP-seq	tim-reddy:FOSL2.t10	ENCSR563GCV	GSE91290	tim-reddy:FOSL2.t10_rep3_chip_seq_fastq	ENCFF350YMP	SRR5092990
ChIP-seq	tim-reddy:FOSL2.t10	ENCSR563GCV	GSE91290	tim-reddy:FOSL2.t10_rep3_chip_seq_narrowPeak	ENCFF851JXW	N/A
ChIP-seq	tim-reddy:FOSL2.t12	ENCSR067XTW	GSE91197	tim-reddy:FOSL2.t12_rep1_chip_seq_bam	ENCFF047HAR	N/A
ChIP-seq	tim-reddy:FOSL2.t12	ENCSR067XTW	GSE91197	tim-reddy:FOSL2.t12_rep1_chip_seq_bigWig	ENCFF795VIO	N/A
ChIP-seq	tim-reddy:FOSL2.t12	ENCSR067XTW	GSE91197	tim-reddy:FOSL2.t12_rep1_chip_seq_fastq	ENCFF600JPF	SRR5093270
ChIP-seq	tim-reddy:FOSL2.t12	ENCSR067XTW	GSE91197	tim-reddy:FOSL2.t12_rep1_chip_seq_narrowPeak	ENCFF010PVD	N/A
ChIP-seq	tim-reddy:FOSL2.t12	ENCSR067XTW	GSE91197	tim-reddy:FOSL2.t12_rep2_chip_seq_bam	ENCFF934SUD	N/A
ChIP-seq	tim-reddy:FOSL2.t12	ENCSR067XTW	GSE91197	tim-reddy:FOSL2.t12_rep2_chip_seq_bigWig	ENCFF466EBX	N/A
ChIP-seq	tim-reddy:FOSL2.t12	ENCSR067XTW	GSE91197	tim-reddy:FOSL2.t12_rep2_chip_seq_fastq	ENCFF985MPY	SRR5093269
ChIP-seq	tim-reddy:FOSL2.t12	ENCSR067XTW	GSE91197	tim-reddy:FOSL2.t12_rep2_chip_seq_narrowPeak	ENCFF885ZXJ	N/A
ChIP-seq	tim-reddy:FOSL2.t12	ENCSR067XTW	GSE91197	tim-reddy:FOSL2.t12_rep3_chip_seq_bam	ENCFF829BQP	N/A
ChIP-seq	tim-reddy:FOSL2.t12	ENCSR067XTW	GSE91197	tim-reddy:FOSL2.t12_rep3_chip_seq_bigWig	ENCFF622UYA	N/A
ChIP-seq	tim-reddy:FOSL2.t12	ENCSR067XTW	GSE91197	tim-reddy:FOSL2.t12_rep3_chip_seq_fastq	ENCFF331YVE	SRR5093271
ChIP-seq	tim-reddy:FOSL2.t12	ENCSR067XTW	GSE91197	tim-reddy:FOSL2.t12_rep3_chip_seq_narrowPeak	ENCFF115TJE	N/A
ChIP-seq	tim-reddy:FOSL2.t1	ENCSR330IJE	GSE91244	tim-reddy:FOSL2.t1_rep1_chip_seq_bam	ENCFF473LME	N/A
ChIP-seq	tim-reddy:FOSL2.t1	ENCSR330IJE	GSE91244	tim-reddy:FOSL2.t1_rep1_chip_seq_bigWig	ENCFF831HDW	N/A
ChIP-seq	tim-reddy:FOSL2.t1	ENCSR330IJE	GSE91244	tim-reddy:FOSL2.t1_rep1_chip_seq_fastq	ENCFF973CRA	SRR5093414
ChIP-seq	tim-reddy:FOSL2.t1	ENCSR330IJE	GSE91244	tim-reddy:FOSL2.t1_rep1_chip_seq_narrowPeak	ENCFF954HSU	N/A
ChIP-seq	tim-reddy:FOSL2.t1	ENCSR330IJE	GSE91244	tim-reddy:FOSL2.t1_rep2_chip_seq_bam	ENCFF045JEK	N/A
ChIP-seq	tim-reddy:FOSL2.t1	ENCSR330IJE	GSE91244	tim-reddy:FOSL2.t1_rep2_chip_seq_bigWig	ENCFF746WQW	N/A
ChIP-seq	tim-reddy:FOSL2.t1	ENCSR330IJE	GSE91244	tim-reddy:FOSL2.t1_rep2_chip_seq_fastq	ENCFF287HDR	SRR5093416
ChIP-seq	tim-reddy:FOSL2.t1	ENCSR330IJE	GSE91244	tim-reddy:FOSL2.t1_rep2_chip_seq_narrowPeak	ENCFF640YXQ	N/A
ChIP-seq	tim-reddy:FOSL2.t1	ENCSR330IJE	GSE91244	tim-reddy:FOSL2.t1_rep3_chip_seq_bam	ENCFF558CXK	N/A
ChIP-seq	tim-reddy:FOSL2.t1	ENCSR330IJE	GSE91244	tim-reddy:FOSL2.t1_rep3_chip_seq_bigWig	ENCFF135LDC	N/A
ChIP-seq	tim-reddy:FOSL2.t1	ENCSR330IJE	GSE91244	tim-reddy:FOSL2.t1_rep3_chip_seq_fastq	ENCFF393VPC	SRR5093415
ChIP-seq	tim-reddy:FOSL2.t1	ENCSR330IJE	GSE91244	tim-reddy:FOSL2.t1_rep3_chip_seq_narrowPeak	ENCFF460GJL	N/A
ChIP-seq	tim-reddy:FOSL2.t2	ENCSR274WRI	GSE91233	tim-reddy:FOSL2.t2_rep1_chip_seq_bam	ENCFF922TRS	N/A
ChIP-seq	tim-reddy:FOSL2.t2	ENCSR274WRI	GSE91233	tim-reddy:FOSL2.t2_rep1_chip_seq_bigWig	ENCFF967KWL	N/A
ChIP-seq	tim-reddy:FOSL2.t2	ENCSR274WRI	GSE91233	tim-reddy:FOSL2.t2_rep1_chip_seq_fastq	ENCFF401KJW	SRR5093381
ChIP-seq	tim-reddy:FOSL2.t2	ENCSR274WRI	GSE91233	tim-reddy:FOSL2.t2_rep1_chip_seq_narrowPeak	ENCFF577LDJ	N/A
ChIP-seq	tim-reddy:FOSL2.t2	ENCSR274WRI	GSE91233	tim-reddy:FOSL2.t2_rep2_chip_seq_bam	ENCFF925IGQ	N/A
ChIP-seq	tim-reddy:FOSL2.t2	ENCSR274WRI	GSE91233	tim-reddy:FOSL2.t2_rep2_chip_seq_bigWig	ENCFF412KFA	N/A
ChIP-seq	tim-reddy:FOSL2.t2	ENCSR274WRI	GSE91233	tim-reddy:FOSL2.t2_rep2_chip_seq_fastq	ENCFF483APP	SRR5093379
ChIP-seq	tim-reddy:FOSL2.t2	ENCSR274WRI	GSE91233	tim-reddy:FOSL2.t2_rep2_chip_seq_narrowPeak	ENCFF361HQJ	N/A
ChIP-seq	tim-reddy:FOSL2.t2	ENCSR274WRI	GSE91233	tim-reddy:FOSL2.t2_rep3_chip_seq_bam	ENCFF725EYQ	N/A
ChIP-seq	tim-reddy:FOSL2.t2	ENCSR274WRI	GSE91233	tim-reddy:FOSL2.t2_rep3_chip_seq_bigWig	ENCFF925AXD	N/A
ChIP-seq	tim-reddy:FOSL2.t2	ENCSR274WRI	GSE91233	tim-reddy:FOSL2.t2_rep3_chip_seq_fastq	ENCFF218ISG	SRR5093380
ChIP-seq	tim-reddy:FOSL2.t2	ENCSR274WRI	GSE91233	tim-reddy:FOSL2.t2_rep3_chip_seq_narrowPeak	ENCFF999YDN	N/A
ChIP-seq	tim-reddy:FOSL2.t3	ENCSR103UVU	GSE91202	tim-reddy:FOSL2.t3_rep1_chip_seq_bam	ENCFF519SIY	N/A
ChIP-seq	tim-reddy:FOSL2.t3	ENCSR103UVU	GSE91202	tim-reddy:FOSL2.t3_rep1_chip_seq_bigWig	ENCFF709BDR	N/A
ChIP-seq	tim-reddy:FOSL2.t3	ENCSR103UVU	GSE91202	tim-reddy:FOSL2.t3_rep1_chip_seq_fastq	ENCFF178FXN	SRR5093282
ChIP-seq	tim-reddy:FOSL2.t3	ENCSR103UVU	GSE91202	tim-reddy:FOSL2.t3_rep1_chip_seq_narrowPeak	ENCFF716LCH	N/A
ChIP-seq	tim-reddy:FOSL2.t3	ENCSR103UVU	GSE91202	tim-reddy:FOSL2.t3_rep2_chip_seq_bam	ENCFF838CNG	N/A
ChIP-seq	tim-reddy:FOSL2.t3	ENCSR103UVU	GSE91202	tim-reddy:FOSL2.t3_rep2_chip_seq_bigWig	ENCFF024MKF	N/A
ChIP-seq	tim-reddy:FOSL2.t3	ENCSR103UVU	GSE91202	tim-reddy:FOSL2.t3_rep2_chip_seq_fastq	ENCFF525UUW	SRR5093281
ChIP-seq	tim-reddy:FOSL2.t3	ENCSR103UVU	GSE91202	tim-reddy:FOSL2.t3_rep2_chip_seq_narrowPeak	ENCFF875MXV	N/A
ChIP-seq	tim-reddy:FOSL2.t4	ENCSR686HIU	GSE91318	tim-reddy:FOSL2.t4_rep1_chip_seq_bam	ENCFF858YVE	N/A
ChIP-seq	tim-reddy:FOSL2.t4	ENCSR686HIU	GSE91318	tim-reddy:FOSL2.t4_rep1_chip_seq_bigWig	ENCFF737OZN	N/A
ChIP-seq	tim-reddy:FOSL2.t4	ENCSR686HIU	GSE91318	tim-reddy:FOSL2.t4_rep1_chip_seq_fastq	ENCFF384BDT	SRR5093078
ChIP-seq	tim-reddy:FOSL2.t4	ENCSR686HIU	GSE91318	tim-reddy:FOSL2.t4_rep1_chip_seq_narrowPeak	ENCFF123PLI	N/A
ChIP-seq	tim-reddy:FOSL2.t4	ENCSR686HIU	GSE91318	tim-reddy:FOSL2.t4_rep2_chip_seq_bam	ENCFF823YAA	N/A
ChIP-seq	tim-reddy:FOSL2.t4	ENCSR686HIU	GSE91318	tim-reddy:FOSL2.t4_rep2_chip_seq_bigWig	ENCFF900MPL	N/A
ChIP-seq	tim-reddy:FOSL2.t4	ENCSR686HIU	GSE91318	tim-reddy:FOSL2.t4_rep2_chip_seq_fastq	ENCFF612DIA	SRR5093079
ChIP-seq	tim-reddy:FOSL2.t4	ENCSR686HIU	GSE91318	tim-reddy:FOSL2.t4_rep2_chip_seq_narrowPeak	ENCFF577VSJ	N/A
ChIP-seq	tim-reddy:FOSL2.t5	ENCSR111ZXV	GSE91204	tim-reddy:FOSL2.t5_rep1_chip_seq_bam	ENCFF647TLY	N/A
ChIP-seq	tim-reddy:FOSL2.t5	ENCSR111ZXV	GSE91204	tim-reddy:FOSL2.t5_rep1_chip_seq_bigWig	ENCFF888PUM	N/A
ChIP-seq	tim-reddy:FOSL2.t5	ENCSR111ZXV	GSE91204	tim-reddy:FOSL2.t5_rep1_chip_seq_fastq	ENCFF431DHF	SRR5093288
ChIP-seq	tim-reddy:FOSL2.t5	ENCSR111ZXV	GSE91204	tim-reddy:FOSL2.t5_rep1_chip_seq_narrowPeak	ENCFF777WZW	N/A
ChIP-seq	tim-reddy:FOSL2.t5	ENCSR111ZXV	GSE91204	tim-reddy:FOSL2.t5_rep2_chip_seq_bam	ENCFF948MFZ	N/A
ChIP-seq	tim-reddy:FOSL2.t5	ENCSR111ZXV	GSE91204	tim-reddy:FOSL2.t5_rep2_chip_seq_bigWig	ENCFF902DUT	N/A
ChIP-seq	tim-reddy:FOSL2.t5	ENCSR111ZXV	GSE91204	tim-reddy:FOSL2.t5_rep2_chip_seq_fastq	ENCFF715UFS	SRR5093287
ChIP-seq	tim-reddy:FOSL2.t5	ENCSR111ZXV	GSE91204	tim-reddy:FOSL2.t5_rep2_chip_seq_narrowPeak	ENCFF398QET	N/A
ChIP-seq	tim-reddy:FOSL2.t5	ENCSR111ZXV	GSE91204	tim-reddy:FOSL2.t5_rep3_chip_seq_bam	ENCFF636EMW	N/A
ChIP-seq	tim-reddy:FOSL2.t5	ENCSR111ZXV	GSE91204	tim-reddy:FOSL2.t5_rep3_chip_seq_bigWig	ENCFF209LWG	N/A
ChIP-seq	tim-reddy:FOSL2.t5	ENCSR111ZXV	GSE91204	tim-reddy:FOSL2.t5_rep3_chip_seq_fastq	ENCFF692PLD	SRR5093286
ChIP-seq	tim-reddy:FOSL2.t5	ENCSR111ZXV	GSE91204	tim-reddy:FOSL2.t5_rep3_chip_seq_narrowPeak	ENCFF470MNE	N/A
ChIP-seq	tim-reddy:FOSL2.t6	ENCSR535HFQ	GSE91279	tim-reddy:FOSL2.t6_rep1_chip_seq_bam	ENCFF382YTB	N/A
ChIP-seq	tim-reddy:FOSL2.t6	ENCSR535HFQ	GSE91279	tim-reddy:FOSL2.t6_rep1_chip_seq_bigWig	ENCFF515DCS	N/A
ChIP-seq	tim-reddy:FOSL2.t6	ENCSR535HFQ	GSE91279	tim-reddy:FOSL2.t6_rep1_chip_seq_fastq	ENCFF401FEX	SRR5092955
ChIP-seq	tim-reddy:FOSL2.t6	ENCSR535HFQ	GSE91279	tim-reddy:FOSL2.t6_rep1_chip_seq_narrowPeak	ENCFF375JDM	N/A
ChIP-seq	tim-reddy:FOSL2.t6	ENCSR535HFQ	GSE91279	tim-reddy:FOSL2.t6_rep2_chip_seq_bam	ENCFF905XDZ	N/A
ChIP-seq	tim-reddy:FOSL2.t6	ENCSR535HFQ	GSE91279	tim-reddy:FOSL2.t6_rep2_chip_seq_bigWig	ENCFF419NBJ	N/A
ChIP-seq	tim-reddy:FOSL2.t6	ENCSR535HFQ	GSE91279	tim-reddy:FOSL2.t6_rep2_chip_seq_fastq	ENCFF220ZNM	SRR5092954
ChIP-seq	tim-reddy:FOSL2.t6	ENCSR535HFQ	GSE91279	tim-reddy:FOSL2.t6_rep2_chip_seq_narrowPeak	ENCFF770AEU	N/A
ChIP-seq	tim-reddy:FOSL2.t6	ENCSR535HFQ	GSE91279	tim-reddy:FOSL2.t6_rep3_chip_seq_bam	ENCFF622NJM	N/A
ChIP-seq	tim-reddy:FOSL2.t6	ENCSR535HFQ	GSE91279	tim-reddy:FOSL2.t6_rep3_chip_seq_bigWig	ENCFF828JFZ	N/A
ChIP-seq	tim-reddy:FOSL2.t6	ENCSR535HFQ	GSE91279	tim-reddy:FOSL2.t6_rep3_chip_seq_fastq	ENCFF917TYM	SRR5092956
ChIP-seq	tim-reddy:FOSL2.t6	ENCSR535HFQ	GSE91279	tim-reddy:FOSL2.t6_rep3_chip_seq_narrowPeak	ENCFF485SCV	N/A
ChIP-seq	tim-reddy:FOSL2.t7	ENCSR900RUE	GSE91350	tim-reddy:FOSL2.t7_rep1_chip_seq_bam	ENCFF683OIO	N/A
ChIP-seq	tim-reddy:FOSL2.t7	ENCSR900RUE	GSE91350	tim-reddy:FOSL2.t7_rep1_chip_seq_bigWig	ENCFF963FKB	N/A
ChIP-seq	tim-reddy:FOSL2.t7	ENCSR900RUE	GSE91350	tim-reddy:FOSL2.t7_rep1_chip_seq_fastq	ENCFF246VAZ	SRR5093169
ChIP-seq	tim-reddy:FOSL2.t7	ENCSR900RUE	GSE91350	tim-reddy:FOSL2.t7_rep1_chip_seq_narrowPeak	ENCFF868UWB	N/A
ChIP-seq	tim-reddy:FOSL2.t7	ENCSR900RUE	GSE91350	tim-reddy:FOSL2.t7_rep2_chip_seq_bam	ENCFF280FHF	N/A
ChIP-seq	tim-reddy:FOSL2.t7	ENCSR900RUE	GSE91350	tim-reddy:FOSL2.t7_rep2_chip_seq_bigWig	ENCFF492IKJ	N/A
ChIP-seq	tim-reddy:FOSL2.t7	ENCSR900RUE	GSE91350	tim-reddy:FOSL2.t7_rep2_chip_seq_fastq	ENCFF451UPX	SRR5093167
ChIP-seq	tim-reddy:FOSL2.t7	ENCSR900RUE	GSE91350	tim-reddy:FOSL2.t7_rep2_chip_seq_narrowPeak	ENCFF482DYU	N/A
ChIP-seq	tim-reddy:FOSL2.t7	ENCSR900RUE	GSE91350	tim-reddy:FOSL2.t7_rep3_chip_seq_bam	ENCFF660PIT	N/A
ChIP-seq	tim-reddy:FOSL2.t7	ENCSR900RUE	GSE91350	tim-reddy:FOSL2.t7_rep3_chip_seq_bigWig	ENCFF498TCM	N/A
ChIP-seq	tim-reddy:FOSL2.t7	ENCSR900RUE	GSE91350	tim-reddy:FOSL2.t7_rep3_chip_seq_fastq	ENCFF128UZP	SRR5093168
ChIP-seq	tim-reddy:FOSL2.t7	ENCSR900RUE	GSE91350	tim-reddy:FOSL2.t7_rep3_chip_seq_narrowPeak	ENCFF018HYZ	N/A
ChIP-seq	tim-reddy:FOSL2.t8	ENCSR242EWU	GSE91224	tim-reddy:FOSL2.t8_rep1_chip_seq_bam	ENCFF413FIJ	N/A
ChIP-seq	tim-reddy:FOSL2.t8	ENCSR242EWU	GSE91224	tim-reddy:FOSL2.t8_rep1_chip_seq_bigWig	ENCFF614EWB	N/A
ChIP-seq	tim-reddy:FOSL2.t8	ENCSR242EWU	GSE91224	tim-reddy:FOSL2.t8_rep1_chip_seq_fastq	ENCFF023BZM	SRR5093350
ChIP-seq	tim-reddy:FOSL2.t8	ENCSR242EWU	GSE91224	tim-reddy:FOSL2.t8_rep1_chip_seq_narrowPeak	ENCFF436NIQ	N/A
ChIP-seq	tim-reddy:FOSL2.t8	ENCSR242EWU	GSE91224	tim-reddy:FOSL2.t8_rep2_chip_seq_bam	ENCFF074RCI	N/A
ChIP-seq	tim-reddy:FOSL2.t8	ENCSR242EWU	GSE91224	tim-reddy:FOSL2.t8_rep2_chip_seq_bigWig	ENCFF638XCG	N/A
ChIP-seq	tim-reddy:FOSL2.t8	ENCSR242EWU	GSE91224	tim-reddy:FOSL2.t8_rep2_chip_seq_fastq	ENCFF820LTK	SRR5093351
ChIP-seq	tim-reddy:FOSL2.t8	ENCSR242EWU	GSE91224	tim-reddy:FOSL2.t8_rep2_chip_seq_narrowPeak	ENCFF389CAS	N/A
ChIP-seq	tim-reddy:FOSL2.t8	ENCSR242EWU	GSE91224	tim-reddy:FOSL2.t8_rep3_chip_seq_bam	ENCFF116SDU	N/A
ChIP-seq	tim-reddy:FOSL2.t8	ENCSR242EWU	GSE91224	tim-reddy:FOSL2.t8_rep3_chip_seq_bigWig	ENCFF670TSL	N/A
ChIP-seq	tim-reddy:FOSL2.t8	ENCSR242EWU	GSE91224	tim-reddy:FOSL2.t8_rep3_chip_seq_fastq	ENCFF159IFU	SRR5093352
ChIP-seq	tim-reddy:FOSL2.t8	ENCSR242EWU	GSE91224	tim-reddy:FOSL2.t8_rep3_chip_seq_narrowPeak	ENCFF993GVP	N/A
ChIP-seq	tim-reddy:GR.t00	ENCSR516IVY	GSE91275	tim-reddy:GR.t00_rep2_chip_seq_bam	ENCFF181HLP	N/A
ChIP-seq	tim-reddy:GR.t00	ENCSR516IVY	GSE91275	tim-reddy:GR.t00_rep2_chip_seq_bigWig	ENCFF627XPX	N/A
ChIP-seq	tim-reddy:GR.t00	ENCSR516IVY	GSE91275	tim-reddy:GR.t00_rep2_chip_seq_fastq	ENCFF654WQR	SRR5092943
ChIP-seq	tim-reddy:GR.t00	ENCSR516IVY	GSE91275	tim-reddy:GR.t00_rep3_chip_seq_bam	ENCFF870WJP	N/A
ChIP-seq	tim-reddy:GR.t00	ENCSR516IVY	GSE91275	tim-reddy:GR.t00_rep3_chip_seq_bigWig	ENCFF260GUF	N/A
ChIP-seq	tim-reddy:GR.t00	ENCSR516IVY	GSE91275	tim-reddy:GR.t00_rep3_chip_seq_fastq	ENCFF140JNQ	SRR5092942
ChIP-seq	tim-reddy:GR.t05	ENCSR773NQB	GSE91333	tim-reddy:GR.t05_rep1_chip_seq_bam	ENCFF613TLN	N/A
ChIP-seq	tim-reddy:GR.t05	ENCSR773NQB	GSE91333	tim-reddy:GR.t05_rep1_chip_seq_bigWig	ENCFF181ZEB	N/A
ChIP-seq	tim-reddy:GR.t05	ENCSR773NQB	GSE91333	tim-reddy:GR.t05_rep1_chip_seq_fastq	ENCFF929NDD	SRR5093119
ChIP-seq	tim-reddy:GR.t05	ENCSR773NQB	GSE91333	tim-reddy:GR.t05_rep1_chip_seq_narrowPeak	ENCFF100IHY	N/A
ChIP-seq	tim-reddy:GR.t05	ENCSR773NQB	GSE91333	tim-reddy:GR.t05_rep2_chip_seq_bam	ENCFF925ICV	N/A
ChIP-seq	tim-reddy:GR.t05	ENCSR773NQB	GSE91333	tim-reddy:GR.t05_rep2_chip_seq_bigWig	ENCFF327IGX	N/A
ChIP-seq	tim-reddy:GR.t05	ENCSR773NQB	GSE91333	tim-reddy:GR.t05_rep2_chip_seq_fastq	ENCFF482GEV	SRR5093117
ChIP-seq	tim-reddy:GR.t05	ENCSR773NQB	GSE91333	tim-reddy:GR.t05_rep2_chip_seq_narrowPeak	ENCFF694KPA	N/A
ChIP-seq	tim-reddy:GR.t05	ENCSR773NQB	GSE91333	tim-reddy:GR.t05_rep3_chip_seq_bam	ENCFF573ZHW	N/A
ChIP-seq	tim-reddy:GR.t05	ENCSR773NQB	GSE91333	tim-reddy:GR.t05_rep3_chip_seq_bigWig	ENCFF100XWR	N/A
ChIP-seq	tim-reddy:GR.t05	ENCSR773NQB	GSE91333	tim-reddy:GR.t05_rep3_chip_seq_fastq	ENCFF697PWW	SRR5093118
ChIP-seq	tim-reddy:GR.t05	ENCSR773NQB	GSE91333	tim-reddy:GR.t05_rep3_chip_seq_narrowPeak	ENCFF177ELY	N/A
ChIP-seq	tim-reddy:GR.t10	ENCSR255CTA	GSE91228	tim-reddy:GR.t10_rep1_chip_seq_bam	ENCFF132MJK	N/A
ChIP-seq	tim-reddy:GR.t10	ENCSR255CTA	GSE91228	tim-reddy:GR.t10_rep1_chip_seq_bigWig	ENCFF972JIF	N/A
ChIP-seq	tim-reddy:GR.t10	ENCSR255CTA	GSE91228	tim-reddy:GR.t10_rep1_chip_seq_fastq	ENCFF208XIN	SRR5093365
ChIP-seq	tim-reddy:GR.t10	ENCSR255CTA	GSE91228	tim-reddy:GR.t10_rep1_chip_seq_narrowPeak	ENCFF114OZN	N/A
ChIP-seq	tim-reddy:GR.t10	ENCSR255CTA	GSE91228	tim-reddy:GR.t10_rep2_chip_seq_bam	ENCFF954UFL	N/A
ChIP-seq	tim-reddy:GR.t10	ENCSR255CTA	GSE91228	tim-reddy:GR.t10_rep2_chip_seq_bigWig	ENCFF377ZMF	N/A
ChIP-seq	tim-reddy:GR.t10	ENCSR255CTA	GSE91228	tim-reddy:GR.t10_rep2_chip_seq_fastq	ENCFF122YCV	SRR5093364
ChIP-seq	tim-reddy:GR.t10	ENCSR255CTA	GSE91228	tim-reddy:GR.t10_rep2_chip_seq_narrowPeak	ENCFF831BHU	N/A
ChIP-seq	tim-reddy:GR.t10	ENCSR255CTA	GSE91228	tim-reddy:GR.t10_rep3_chip_seq_bam	ENCFF028TGQ	N/A
ChIP-seq	tim-reddy:GR.t10	ENCSR255CTA	GSE91228	tim-reddy:GR.t10_rep3_chip_seq_bigWig	ENCFF321OTI	N/A
ChIP-seq	tim-reddy:GR.t10	ENCSR255CTA	GSE91228	tim-reddy:GR.t10_rep3_chip_seq_fastq	ENCFF516LUP	SRR5093366
ChIP-seq	tim-reddy:GR.t10	ENCSR255CTA	GSE91228	tim-reddy:GR.t10_rep3_chip_seq_narrowPeak	ENCFF143GRG	N/A
ChIP-seq	tim-reddy:GR.t12	ENCSR287FWE	GSE91235	tim-reddy:GR.t12_rep1_chip_seq_bam	ENCFF221AJW	N/A
ChIP-seq	tim-reddy:GR.t12	ENCSR287FWE	GSE91235	tim-reddy:GR.t12_rep1_chip_seq_bigWig	ENCFF613BWE	N/A
ChIP-seq	tim-reddy:GR.t12	ENCSR287FWE	GSE91235	tim-reddy:GR.t12_rep1_chip_seq_fastq	ENCFF325UOQ	SRR5093387
ChIP-seq	tim-reddy:GR.t12	ENCSR287FWE	GSE91235	tim-reddy:GR.t12_rep1_chip_seq_narrowPeak	ENCFF011CUR	N/A
ChIP-seq	tim-reddy:GR.t12	ENCSR287FWE	GSE91235	tim-reddy:GR.t12_rep2_chip_seq_bam	ENCFF236LTP	N/A
ChIP-seq	tim-reddy:GR.t12	ENCSR287FWE	GSE91235	tim-reddy:GR.t12_rep2_chip_seq_bigWig	ENCFF505SYX	N/A
ChIP-seq	tim-reddy:GR.t12	ENCSR287FWE	GSE91235	tim-reddy:GR.t12_rep2_chip_seq_fastq	ENCFF311IBS	SRR5093386
ChIP-seq	tim-reddy:GR.t12	ENCSR287FWE	GSE91235	tim-reddy:GR.t12_rep2_chip_seq_narrowPeak	ENCFF983QTI	N/A
ChIP-seq	tim-reddy:GR.t12	ENCSR287FWE	GSE91235	tim-reddy:GR.t12_rep3_chip_seq_bam	ENCFF888BBP	N/A
ChIP-seq	tim-reddy:GR.t12	ENCSR287FWE	GSE91235	tim-reddy:GR.t12_rep3_chip_seq_bigWig	ENCFF632TED	N/A
ChIP-seq	tim-reddy:GR.t12	ENCSR287FWE	GSE91235	tim-reddy:GR.t12_rep3_chip_seq_fastq	ENCFF881PQP	SRR5093385
ChIP-seq	tim-reddy:GR.t12	ENCSR287FWE	GSE91235	tim-reddy:GR.t12_rep3_chip_seq_narrowPeak	ENCFF984JYU	N/A
ChIP-seq	tim-reddy:GR.t1	ENCSR919OXR	GSE91357	tim-reddy:GR.t1_rep1_chip_seq_bam	ENCFF331QXR	N/A
ChIP-seq	tim-reddy:GR.t1	ENCSR919OXR	GSE91357	tim-reddy:GR.t1_rep1_chip_seq_bigWig	ENCFF434HBK	N/A
ChIP-seq	tim-reddy:GR.t1	ENCSR919OXR	GSE91357	tim-reddy:GR.t1_rep1_chip_seq_fastq	ENCFF755CLR	SRR5093187
ChIP-seq	tim-reddy:GR.t1	ENCSR919OXR	GSE91357	tim-reddy:GR.t1_rep1_chip_seq_narrowPeak	ENCFF044MLR	N/A
ChIP-seq	tim-reddy:GR.t1	ENCSR919OXR	GSE91357	tim-reddy:GR.t1_rep2_chip_seq_bam	ENCFF807YIG	N/A
ChIP-seq	tim-reddy:GR.t1	ENCSR919OXR	GSE91357	tim-reddy:GR.t1_rep2_chip_seq_bigWig	ENCFF849GMQ	N/A
ChIP-seq	tim-reddy:GR.t1	ENCSR919OXR	GSE91357	tim-reddy:GR.t1_rep2_chip_seq_fastq	ENCFF734NCF	SRR5093186
ChIP-seq	tim-reddy:GR.t1	ENCSR919OXR	GSE91357	tim-reddy:GR.t1_rep2_chip_seq_narrowPeak	ENCFF835HHK	N/A
ChIP-seq	tim-reddy:GR.t1	ENCSR919OXR	GSE91357	tim-reddy:GR.t1_rep3_chip_seq_bam	ENCFF038DBH	N/A
ChIP-seq	tim-reddy:GR.t1	ENCSR919OXR	GSE91357	tim-reddy:GR.t1_rep3_chip_seq_bigWig	ENCFF555VJB	N/A
ChIP-seq	tim-reddy:GR.t1	ENCSR919OXR	GSE91357	tim-reddy:GR.t1_rep3_chip_seq_fastq	ENCFF227KMI	SRR5093188
ChIP-seq	tim-reddy:GR.t1	ENCSR919OXR	GSE91357	tim-reddy:GR.t1_rep3_chip_seq_narrowPeak	ENCFF597LEE	N/A
ChIP-seq	tim-reddy:GR.t2	ENCSR720DXT	GSE91327	tim-reddy:GR.t2_rep1_chip_seq_bam	ENCFF159BEG	N/A
ChIP-seq	tim-reddy:GR.t2	ENCSR720DXT	GSE91327	tim-reddy:GR.t2_rep1_chip_seq_bigWig	ENCFF505RSL	N/A
ChIP-seq	tim-reddy:GR.t2	ENCSR720DXT	GSE91327	tim-reddy:GR.t2_rep1_chip_seq_fastq	ENCFF467NXW	SRR5093101
ChIP-seq	tim-reddy:GR.t2	ENCSR720DXT	GSE91327	tim-reddy:GR.t2_rep1_chip_seq_narrowPeak	ENCFF776EEM	N/A
ChIP-seq	tim-reddy:GR.t2	ENCSR720DXT	GSE91327	tim-reddy:GR.t2_rep2_chip_seq_bam	ENCFF293YRI	N/A
ChIP-seq	tim-reddy:GR.t2	ENCSR720DXT	GSE91327	tim-reddy:GR.t2_rep2_chip_seq_bigWig	ENCFF527LTH	N/A
ChIP-seq	tim-reddy:GR.t2	ENCSR720DXT	GSE91327	tim-reddy:GR.t2_rep2_chip_seq_fastq	ENCFF590PAE	SRR5093099
ChIP-seq	tim-reddy:GR.t2	ENCSR720DXT	GSE91327	tim-reddy:GR.t2_rep2_chip_seq_narrowPeak	ENCFF065KNI	N/A
ChIP-seq	tim-reddy:GR.t2	ENCSR720DXT	GSE91327	tim-reddy:GR.t2_rep3_chip_seq_bam	ENCFF406NSJ	N/A
ChIP-seq	tim-reddy:GR.t2	ENCSR720DXT	GSE91327	tim-reddy:GR.t2_rep3_chip_seq_bigWig	ENCFF233EXX	N/A
ChIP-seq	tim-reddy:GR.t2	ENCSR720DXT	GSE91327	tim-reddy:GR.t2_rep3_chip_seq_fastq	ENCFF372ESG	SRR5093100
ChIP-seq	tim-reddy:GR.t2	ENCSR720DXT	GSE91327	tim-reddy:GR.t2_rep3_chip_seq_narrowPeak	ENCFF313TUM	N/A
ChIP-seq	tim-reddy:GR.t3	ENCSR385RUW	GSE91254	tim-reddy:GR.t3_rep1_chip_seq_bam	ENCFF914JQO	N/A
ChIP-seq	tim-reddy:GR.t3	ENCSR385RUW	GSE91254	tim-reddy:GR.t3_rep1_chip_seq_bigWig	ENCFF025BFP	N/A
ChIP-seq	tim-reddy:GR.t3	ENCSR385RUW	GSE91254	tim-reddy:GR.t3_rep1_chip_seq_fastq	ENCFF354PUQ	SRR5093448
ChIP-seq	tim-reddy:GR.t3	ENCSR385RUW	GSE91254	tim-reddy:GR.t3_rep1_chip_seq_narrowPeak	ENCFF704NNG	N/A
ChIP-seq	tim-reddy:GR.t3	ENCSR385RUW	GSE91254	tim-reddy:GR.t3_rep2_chip_seq_bam	ENCFF327AJH	N/A
ChIP-seq	tim-reddy:GR.t3	ENCSR385RUW	GSE91254	tim-reddy:GR.t3_rep2_chip_seq_bigWig	ENCFF990OFG	N/A
ChIP-seq	tim-reddy:GR.t3	ENCSR385RUW	GSE91254	tim-reddy:GR.t3_rep2_chip_seq_fastq	ENCFF577KHF	SRR5093447
ChIP-seq	tim-reddy:GR.t3	ENCSR385RUW	GSE91254	tim-reddy:GR.t3_rep2_chip_seq_narrowPeak	ENCFF984UQO	N/A
ChIP-seq	tim-reddy:GR.t3	ENCSR385RUW	GSE91254	tim-reddy:GR.t3_rep3_chip_seq_bam	ENCFF352QLS	N/A
ChIP-seq	tim-reddy:GR.t3	ENCSR385RUW	GSE91254	tim-reddy:GR.t3_rep3_chip_seq_bigWig	ENCFF141URM	N/A
ChIP-seq	tim-reddy:GR.t3	ENCSR385RUW	GSE91254	tim-reddy:GR.t3_rep3_chip_seq_fastq	ENCFF706GSP	SRR5093446
ChIP-seq	tim-reddy:GR.t3	ENCSR385RUW	GSE91254	tim-reddy:GR.t3_rep3_chip_seq_narrowPeak	ENCFF810BWP	N/A
ChIP-seq	tim-reddy:GR.t4	ENCSR660RYY	GSE91313	tim-reddy:GR.t4_rep1_chip_seq_bam	ENCFF368XSU	N/A
ChIP-seq	tim-reddy:GR.t4	ENCSR660RYY	GSE91313	tim-reddy:GR.t4_rep1_chip_seq_bigWig	ENCFF803WMP	N/A
ChIP-seq	tim-reddy:GR.t4	ENCSR660RYY	GSE91313	tim-reddy:GR.t4_rep1_chip_seq_fastq	ENCFF669SVD	SRR5093063
ChIP-seq	tim-reddy:GR.t4	ENCSR660RYY	GSE91313	tim-reddy:GR.t4_rep1_chip_seq_narrowPeak	ENCFF819OKP	N/A
ChIP-seq	tim-reddy:GR.t4	ENCSR660RYY	GSE91313	tim-reddy:GR.t4_rep2_chip_seq_bam	ENCFF122YXG	N/A
ChIP-seq	tim-reddy:GR.t4	ENCSR660RYY	GSE91313	tim-reddy:GR.t4_rep2_chip_seq_bigWig	ENCFF778FPM	N/A
ChIP-seq	tim-reddy:GR.t4	ENCSR660RYY	GSE91313	tim-reddy:GR.t4_rep2_chip_seq_fastq	ENCFF643LMB	SRR5093061
ChIP-seq	tim-reddy:GR.t4	ENCSR660RYY	GSE91313	tim-reddy:GR.t4_rep2_chip_seq_narrowPeak	ENCFF943XNF	N/A
ChIP-seq	tim-reddy:GR.t4	ENCSR660RYY	GSE91313	tim-reddy:GR.t4_rep3_chip_seq_bam	ENCFF450WID	N/A
ChIP-seq	tim-reddy:GR.t4	ENCSR660RYY	GSE91313	tim-reddy:GR.t4_rep3_chip_seq_bigWig	ENCFF270JWG	N/A
ChIP-seq	tim-reddy:GR.t4	ENCSR660RYY	GSE91313	tim-reddy:GR.t4_rep3_chip_seq_fastq	ENCFF435SDL	SRR5093062
ChIP-seq	tim-reddy:GR.t4	ENCSR660RYY	GSE91313	tim-reddy:GR.t4_rep3_chip_seq_narrowPeak	ENCFF472VHO	N/A
ChIP-seq	tim-reddy:GR.t5	ENCSR686PFM	GSE91319	tim-reddy:GR.t5_rep1_chip_seq_bam	ENCFF273WGP	N/A
ChIP-seq	tim-reddy:GR.t5	ENCSR686PFM	GSE91319	tim-reddy:GR.t5_rep1_chip_seq_bigWig	ENCFF369PCA	N/A
ChIP-seq	tim-reddy:GR.t5	ENCSR686PFM	GSE91319	tim-reddy:GR.t5_rep1_chip_seq_fastq	ENCFF676ATC	SRR5093075
ChIP-seq	tim-reddy:GR.t5	ENCSR686PFM	GSE91319	tim-reddy:GR.t5_rep1_chip_seq_narrowPeak	ENCFF687SOY	N/A
ChIP-seq	tim-reddy:GR.t5	ENCSR686PFM	GSE91319	tim-reddy:GR.t5_rep2_chip_seq_bam	ENCFF376IEV	N/A
ChIP-seq	tim-reddy:GR.t5	ENCSR686PFM	GSE91319	tim-reddy:GR.t5_rep2_chip_seq_bigWig	ENCFF304DII	N/A
ChIP-seq	tim-reddy:GR.t5	ENCSR686PFM	GSE91319	tim-reddy:GR.t5_rep2_chip_seq_fastq	ENCFF599KQU	SRR5093077
ChIP-seq	tim-reddy:GR.t5	ENCSR686PFM	GSE91319	tim-reddy:GR.t5_rep2_chip_seq_narrowPeak	ENCFF165WVN	N/A
ChIP-seq	tim-reddy:GR.t5	ENCSR686PFM	GSE91319	tim-reddy:GR.t5_rep3_chip_seq_bam	ENCFF540BCR	N/A
ChIP-seq	tim-reddy:GR.t5	ENCSR686PFM	GSE91319	tim-reddy:GR.t5_rep3_chip_seq_bigWig	ENCFF499SZK	N/A
ChIP-seq	tim-reddy:GR.t5	ENCSR686PFM	GSE91319	tim-reddy:GR.t5_rep3_chip_seq_fastq	ENCFF145DDL	SRR5093076
ChIP-seq	tim-reddy:GR.t5	ENCSR686PFM	GSE91319	tim-reddy:GR.t5_rep3_chip_seq_narrowPeak	ENCFF102MPS	N/A
ChIP-seq	tim-reddy:GR.t6	ENCSR424JOE	GSE91260	tim-reddy:GR.t6_rep1_chip_seq_bam	ENCFF421XWH	N/A
ChIP-seq	tim-reddy:GR.t6	ENCSR424JOE	GSE91260	tim-reddy:GR.t6_rep1_chip_seq_bigWig	ENCFF961ZLK	N/A
ChIP-seq	tim-reddy:GR.t6	ENCSR424JOE	GSE91260	tim-reddy:GR.t6_rep1_chip_seq_fastq	ENCFF335LGU	SRR5093468
ChIP-seq	tim-reddy:GR.t6	ENCSR424JOE	GSE91260	tim-reddy:GR.t6_rep1_chip_seq_narrowPeak	ENCFF531BOF	N/A
ChIP-seq	tim-reddy:GR.t6	ENCSR424JOE	GSE91260	tim-reddy:GR.t6_rep2_chip_seq_bam	ENCFF898OAG	N/A
ChIP-seq	tim-reddy:GR.t6	ENCSR424JOE	GSE91260	tim-reddy:GR.t6_rep2_chip_seq_bigWig	ENCFF268XVI	N/A
ChIP-seq	tim-reddy:GR.t6	ENCSR424JOE	GSE91260	tim-reddy:GR.t6_rep2_chip_seq_fastq	ENCFF639GAY	SRR5093466
ChIP-seq	tim-reddy:GR.t6	ENCSR424JOE	GSE91260	tim-reddy:GR.t6_rep2_chip_seq_narrowPeak	ENCFF915SJC	N/A
ChIP-seq	tim-reddy:GR.t6	ENCSR424JOE	GSE91260	tim-reddy:GR.t6_rep3_chip_seq_bam	ENCFF850VBX	N/A
ChIP-seq	tim-reddy:GR.t6	ENCSR424JOE	GSE91260	tim-reddy:GR.t6_rep3_chip_seq_bigWig	ENCFF465BPX	N/A
ChIP-seq	tim-reddy:GR.t6	ENCSR424JOE	GSE91260	tim-reddy:GR.t6_rep3_chip_seq_fastq	ENCFF753QBM	SRR5093467
ChIP-seq	tim-reddy:GR.t6	ENCSR424JOE	GSE91260	tim-reddy:GR.t6_rep3_chip_seq_narrowPeak	ENCFF042SKZ	N/A
ChIP-seq	tim-reddy:GR.t7	ENCSR952GOL	GSE91365	tim-reddy:GR.t7_rep1_chip_seq_bam	ENCFF461MWZ	N/A
ChIP-seq	tim-reddy:GR.t7	ENCSR952GOL	GSE91365	tim-reddy:GR.t7_rep1_chip_seq_bigWig	ENCFF077JHA	N/A
ChIP-seq	tim-reddy:GR.t7	ENCSR952GOL	GSE91365	tim-reddy:GR.t7_rep1_chip_seq_fastq	ENCFF504ADZ	SRR5093208
ChIP-seq	tim-reddy:GR.t7	ENCSR952GOL	GSE91365	tim-reddy:GR.t7_rep1_chip_seq_narrowPeak	ENCFF746DKH	N/A
ChIP-seq	tim-reddy:GR.t7	ENCSR952GOL	GSE91365	tim-reddy:GR.t7_rep2_chip_seq_bam	ENCFF526FQH	N/A
ChIP-seq	tim-reddy:GR.t7	ENCSR952GOL	GSE91365	tim-reddy:GR.t7_rep2_chip_seq_bigWig	ENCFF685DIG	N/A
ChIP-seq	tim-reddy:GR.t7	ENCSR952GOL	GSE91365	tim-reddy:GR.t7_rep2_chip_seq_fastq	ENCFF547YQW	SRR5093210
ChIP-seq	tim-reddy:GR.t7	ENCSR952GOL	GSE91365	tim-reddy:GR.t7_rep2_chip_seq_narrowPeak	ENCFF471DNW	N/A
ChIP-seq	tim-reddy:GR.t7	ENCSR952GOL	GSE91365	tim-reddy:GR.t7_rep3_chip_seq_bam	ENCFF934SEH	N/A
ChIP-seq	tim-reddy:GR.t7	ENCSR952GOL	GSE91365	tim-reddy:GR.t7_rep3_chip_seq_bigWig	ENCFF981CWC	N/A
ChIP-seq	tim-reddy:GR.t7	ENCSR952GOL	GSE91365	tim-reddy:GR.t7_rep3_chip_seq_fastq	ENCFF280LFF	SRR5093209
ChIP-seq	tim-reddy:GR.t7	ENCSR952GOL	GSE91365	tim-reddy:GR.t7_rep3_chip_seq_narrowPeak	ENCFF577XDD	N/A
ChIP-seq	tim-reddy:GR.t8	ENCSR691GRA	GSE91322	tim-reddy:GR.t8_rep1_chip_seq_bam	ENCFF219MZR	N/A
ChIP-seq	tim-reddy:GR.t8	ENCSR691GRA	GSE91322	tim-reddy:GR.t8_rep1_chip_seq_bigWig	ENCFF898UKV	N/A
ChIP-seq	tim-reddy:GR.t8	ENCSR691GRA	GSE91322	tim-reddy:GR.t8_rep1_chip_seq_fastq	ENCFF034NFU	SRR5093086
ChIP-seq	tim-reddy:GR.t8	ENCSR691GRA	GSE91322	tim-reddy:GR.t8_rep1_chip_seq_narrowPeak	ENCFF436TYR	N/A
ChIP-seq	tim-reddy:GR.t8	ENCSR691GRA	GSE91322	tim-reddy:GR.t8_rep2_chip_seq_bam	ENCFF188INN	N/A
ChIP-seq	tim-reddy:GR.t8	ENCSR691GRA	GSE91322	tim-reddy:GR.t8_rep2_chip_seq_bigWig	ENCFF558WES	N/A
ChIP-seq	tim-reddy:GR.t8	ENCSR691GRA	GSE91322	tim-reddy:GR.t8_rep2_chip_seq_fastq	ENCFF911MFK	SRR5093087
ChIP-seq	tim-reddy:GR.t8	ENCSR691GRA	GSE91322	tim-reddy:GR.t8_rep2_chip_seq_narrowPeak	ENCFF311GPL	N/A
ChIP-seq	tim-reddy:GR.t8	ENCSR691GRA	GSE91322	tim-reddy:GR.t8_rep3_chip_seq_bam	ENCFF451ZLK	N/A
ChIP-seq	tim-reddy:GR.t8	ENCSR691GRA	GSE91322	tim-reddy:GR.t8_rep3_chip_seq_bigWig	ENCFF145KGJ	N/A
ChIP-seq	tim-reddy:GR.t8	ENCSR691GRA	GSE91322	tim-reddy:GR.t8_rep3_chip_seq_fastq	ENCFF754VFN	SRR5093085
ChIP-seq	tim-reddy:GR.t8	ENCSR691GRA	GSE91322	tim-reddy:GR.t8_rep3_chip_seq_narrowPeak	ENCFF504BEH	N/A
ChIP-seq	tim-reddy:H3K27ac.t00	ENCSR783SNV	GSE91337	tim-reddy:H3K27ac.t00_rep1_chip_seq_bam	ENCFF393XCS	N/A
ChIP-seq	tim-reddy:H3K27ac.t00	ENCSR783SNV	GSE91337	tim-reddy:H3K27ac.t00_rep1_chip_seq_bigWig	ENCFF403ARJ	N/A
ChIP-seq	tim-reddy:H3K27ac.t00	ENCSR783SNV	GSE91337	tim-reddy:H3K27ac.t00_rep1_chip_seq_fastq	ENCFF823YGI	SRR5093131
ChIP-seq	tim-reddy:H3K27ac.t00	ENCSR783SNV	GSE91337	tim-reddy:H3K27ac.t00_rep1_chip_seq_narrowPeak	ENCFF981LQL	N/A
ChIP-seq	tim-reddy:H3K27ac.t00	ENCSR783SNV	GSE91337	tim-reddy:H3K27ac.t00_rep2_chip_seq_bam	ENCFF117TAC	N/A
ChIP-seq	tim-reddy:H3K27ac.t00	ENCSR783SNV	GSE91337	tim-reddy:H3K27ac.t00_rep2_chip_seq_bigWig	ENCFF368DYG	N/A
ChIP-seq	tim-reddy:H3K27ac.t00	ENCSR783SNV	GSE91337	tim-reddy:H3K27ac.t00_rep2_chip_seq_fastq	ENCFF187VER	SRR5093130
ChIP-seq	tim-reddy:H3K27ac.t00	ENCSR783SNV	GSE91337	tim-reddy:H3K27ac.t00_rep2_chip_seq_narrowPeak	ENCFF319QRW	N/A
ChIP-seq	tim-reddy:H3K27ac.t00	ENCSR783SNV	GSE91337	tim-reddy:H3K27ac.t00_rep3_chip_seq_bam	ENCFF273YZW	N/A
ChIP-seq	tim-reddy:H3K27ac.t00	ENCSR783SNV	GSE91337	tim-reddy:H3K27ac.t00_rep3_chip_seq_bigWig	ENCFF033GZF	N/A
ChIP-seq	tim-reddy:H3K27ac.t00	ENCSR783SNV	GSE91337	tim-reddy:H3K27ac.t00_rep3_chip_seq_fastq	ENCFF573OYR	SRR5093129
ChIP-seq	tim-reddy:H3K27ac.t00	ENCSR783SNV	GSE91337	tim-reddy:H3K27ac.t00_rep3_chip_seq_narrowPeak	ENCFF462ISY	N/A
ChIP-seq	tim-reddy:H3K27ac.t05	ENCSR102XUM	GSE91201	tim-reddy:H3K27ac.t05_rep1_chip_seq_bam	ENCFF039EBI	N/A
ChIP-seq	tim-reddy:H3K27ac.t05	ENCSR102XUM	GSE91201	tim-reddy:H3K27ac.t05_rep1_chip_seq_bigWig	ENCFF468DZE	N/A
ChIP-seq	tim-reddy:H3K27ac.t05	ENCSR102XUM	GSE91201	tim-reddy:H3K27ac.t05_rep1_chip_seq_fastq	ENCFF943CYX	SRR5093278
ChIP-seq	tim-reddy:H3K27ac.t05	ENCSR102XUM	GSE91201	tim-reddy:H3K27ac.t05_rep1_chip_seq_narrowPeak	ENCFF090HLG	N/A
ChIP-seq	tim-reddy:H3K27ac.t05	ENCSR102XUM	GSE91201	tim-reddy:H3K27ac.t05_rep2_chip_seq_bam	ENCFF003WBP	N/A
ChIP-seq	tim-reddy:H3K27ac.t05	ENCSR102XUM	GSE91201	tim-reddy:H3K27ac.t05_rep2_chip_seq_bigWig	ENCFF648VWZ	N/A
ChIP-seq	tim-reddy:H3K27ac.t05	ENCSR102XUM	GSE91201	tim-reddy:H3K27ac.t05_rep2_chip_seq_fastq	ENCFF432NFM	SRR5093277
ChIP-seq	tim-reddy:H3K27ac.t05	ENCSR102XUM	GSE91201	tim-reddy:H3K27ac.t05_rep2_chip_seq_narrowPeak	ENCFF978WDE	N/A
ChIP-seq	tim-reddy:H3K27ac.t05	ENCSR102XUM	GSE91201	tim-reddy:H3K27ac.t05_rep3_chip_seq_bam	ENCFF566EQS	N/A
ChIP-seq	tim-reddy:H3K27ac.t05	ENCSR102XUM	GSE91201	tim-reddy:H3K27ac.t05_rep3_chip_seq_bigWig	ENCFF436JYO	N/A
ChIP-seq	tim-reddy:H3K27ac.t05	ENCSR102XUM	GSE91201	tim-reddy:H3K27ac.t05_rep3_chip_seq_fastq	ENCFF436GPV	SRR5093276
ChIP-seq	tim-reddy:H3K27ac.t05	ENCSR102XUM	GSE91201	tim-reddy:H3K27ac.t05_rep3_chip_seq_narrowPeak	ENCFF702XHK	N/A
ChIP-seq	tim-reddy:H3K27ac.t10	ENCSR180YHA	GSE91214	tim-reddy:H3K27ac.t10_rep1_chip_seq_bam	ENCFF850JIY	N/A
ChIP-seq	tim-reddy:H3K27ac.t10	ENCSR180YHA	GSE91214	tim-reddy:H3K27ac.t10_rep1_chip_seq_bigWig	ENCFF259IZV	N/A
ChIP-seq	tim-reddy:H3K27ac.t10	ENCSR180YHA	GSE91214	tim-reddy:H3K27ac.t10_rep1_chip_seq_fastq	ENCFF522VJD	SRR5093327
ChIP-seq	tim-reddy:H3K27ac.t10	ENCSR180YHA	GSE91214	tim-reddy:H3K27ac.t10_rep1_chip_seq_narrowPeak	ENCFF596BOO	N/A
ChIP-seq	tim-reddy:H3K27ac.t10	ENCSR180YHA	GSE91214	tim-reddy:H3K27ac.t10_rep2_chip_seq_bam	ENCFF094LYO	N/A
ChIP-seq	tim-reddy:H3K27ac.t10	ENCSR180YHA	GSE91214	tim-reddy:H3K27ac.t10_rep2_chip_seq_bigWig	ENCFF448YPE	N/A
ChIP-seq	tim-reddy:H3K27ac.t10	ENCSR180YHA	GSE91214	tim-reddy:H3K27ac.t10_rep2_chip_seq_fastq	ENCFF562MBW	SRR5093328
ChIP-seq	tim-reddy:H3K27ac.t10	ENCSR180YHA	GSE91214	tim-reddy:H3K27ac.t10_rep2_chip_seq_narrowPeak	ENCFF947DMT	N/A
ChIP-seq	tim-reddy:H3K27ac.t10	ENCSR180YHA	GSE91214	tim-reddy:H3K27ac.t10_rep3_chip_seq_bam	ENCFF351FJC	N/A
ChIP-seq	tim-reddy:H3K27ac.t10	ENCSR180YHA	GSE91214	tim-reddy:H3K27ac.t10_rep3_chip_seq_bigWig	ENCFF086FGW	N/A
ChIP-seq	tim-reddy:H3K27ac.t10	ENCSR180YHA	GSE91214	tim-reddy:H3K27ac.t10_rep3_chip_seq_fastq	ENCFF428CQY	SRR5093326
ChIP-seq	tim-reddy:H3K27ac.t10	ENCSR180YHA	GSE91214	tim-reddy:H3K27ac.t10_rep3_chip_seq_narrowPeak	ENCFF260NVM	N/A
ChIP-seq	tim-reddy:H3K27ac.t12	ENCSR435JKM	GSE91263	tim-reddy:H3K27ac.t12_rep1_chip_seq_bam	ENCFF491TCE	N/A
ChIP-seq	tim-reddy:H3K27ac.t12	ENCSR435JKM	GSE91263	tim-reddy:H3K27ac.t12_rep1_chip_seq_bigWig	ENCFF821NRU	N/A
ChIP-seq	tim-reddy:H3K27ac.t12	ENCSR435JKM	GSE91263	tim-reddy:H3K27ac.t12_rep1_chip_seq_fastq	ENCFF051HIO	SRR5092909
ChIP-seq	tim-reddy:H3K27ac.t12	ENCSR435JKM	GSE91263	tim-reddy:H3K27ac.t12_rep1_chip_seq_narrowPeak	ENCFF171QVQ	N/A
ChIP-seq	tim-reddy:H3K27ac.t12	ENCSR435JKM	GSE91263	tim-reddy:H3K27ac.t12_rep2_chip_seq_bam	ENCFF646QLP	N/A
ChIP-seq	tim-reddy:H3K27ac.t12	ENCSR435JKM	GSE91263	tim-reddy:H3K27ac.t12_rep2_chip_seq_bigWig	ENCFF314OGM	N/A
ChIP-seq	tim-reddy:H3K27ac.t12	ENCSR435JKM	GSE91263	tim-reddy:H3K27ac.t12_rep2_chip_seq_fastq	ENCFF445JNN	SRR5092910
ChIP-seq	tim-reddy:H3K27ac.t12	ENCSR435JKM	GSE91263	tim-reddy:H3K27ac.t12_rep2_chip_seq_narrowPeak	ENCFF086FZJ	N/A
ChIP-seq	tim-reddy:H3K27ac.t12	ENCSR435JKM	GSE91263	tim-reddy:H3K27ac.t12_rep3_chip_seq_bam	ENCFF436EIX	N/A
ChIP-seq	tim-reddy:H3K27ac.t12	ENCSR435JKM	GSE91263	tim-reddy:H3K27ac.t12_rep3_chip_seq_bigWig	ENCFF620IWV	N/A
ChIP-seq	tim-reddy:H3K27ac.t12	ENCSR435JKM	GSE91263	tim-reddy:H3K27ac.t12_rep3_chip_seq_fastq	ENCFF138WAA	SRR5092908
ChIP-seq	tim-reddy:H3K27ac.t12	ENCSR435JKM	GSE91263	tim-reddy:H3K27ac.t12_rep3_chip_seq_narrowPeak	ENCFF998UVS	N/A
ChIP-seq	tim-reddy:H3K27ac.t1	ENCSR242TBH	GSE91225	tim-reddy:H3K27ac.t1_rep1_chip_seq_bam	ENCFF049RFE	N/A
ChIP-seq	tim-reddy:H3K27ac.t1	ENCSR242TBH	GSE91225	tim-reddy:H3K27ac.t1_rep1_chip_seq_bigWig	ENCFF728CGK	N/A
ChIP-seq	tim-reddy:H3K27ac.t1	ENCSR242TBH	GSE91225	tim-reddy:H3K27ac.t1_rep1_chip_seq_fastq	ENCFF420VHJ	SRR5093358
ChIP-seq	tim-reddy:H3K27ac.t1	ENCSR242TBH	GSE91225	tim-reddy:H3K27ac.t1_rep1_chip_seq_narrowPeak	ENCFF274UXL	N/A
ChIP-seq	tim-reddy:H3K27ac.t1	ENCSR242TBH	GSE91225	tim-reddy:H3K27ac.t1_rep2_chip_seq_bam	ENCFF460SLO	N/A
ChIP-seq	tim-reddy:H3K27ac.t1	ENCSR242TBH	GSE91225	tim-reddy:H3K27ac.t1_rep2_chip_seq_bigWig	ENCFF909NFO	N/A
ChIP-seq	tim-reddy:H3K27ac.t1	ENCSR242TBH	GSE91225	tim-reddy:H3K27ac.t1_rep2_chip_seq_fastq	ENCFF262JTH	SRR5093356
ChIP-seq	tim-reddy:H3K27ac.t1	ENCSR242TBH	GSE91225	tim-reddy:H3K27ac.t1_rep2_chip_seq_narrowPeak	ENCFF097VHZ	N/A
ChIP-seq	tim-reddy:H3K27ac.t1	ENCSR242TBH	GSE91225	tim-reddy:H3K27ac.t1_rep3_chip_seq_bam	ENCFF036MPT	N/A
ChIP-seq	tim-reddy:H3K27ac.t1	ENCSR242TBH	GSE91225	tim-reddy:H3K27ac.t1_rep3_chip_seq_bigWig	ENCFF877LIR	N/A
ChIP-seq	tim-reddy:H3K27ac.t1	ENCSR242TBH	GSE91225	tim-reddy:H3K27ac.t1_rep3_chip_seq_fastq	ENCFF611SVJ	SRR5093357
ChIP-seq	tim-reddy:H3K27ac.t1	ENCSR242TBH	GSE91225	tim-reddy:H3K27ac.t1_rep3_chip_seq_narrowPeak	ENCFF958GJO	N/A
ChIP-seq	tim-reddy:H3K27ac.t2	ENCSR614NPG	GSE91301	tim-reddy:H3K27ac.t2_rep1_chip_seq_bam	ENCFF255KSG	N/A
ChIP-seq	tim-reddy:H3K27ac.t2	ENCSR614NPG	GSE91301	tim-reddy:H3K27ac.t2_rep1_chip_seq_bigWig	ENCFF303JSQ	N/A
ChIP-seq	tim-reddy:H3K27ac.t2	ENCSR614NPG	GSE91301	tim-reddy:H3K27ac.t2_rep1_chip_seq_fastq	ENCFF019ZWS	SRR5093023
ChIP-seq	tim-reddy:H3K27ac.t2	ENCSR614NPG	GSE91301	tim-reddy:H3K27ac.t2_rep1_chip_seq_narrowPeak	ENCFF930FCW	N/A
ChIP-seq	tim-reddy:H3K27ac.t2	ENCSR614NPG	GSE91301	tim-reddy:H3K27ac.t2_rep2_chip_seq_bam	ENCFF096EDA	N/A
ChIP-seq	tim-reddy:H3K27ac.t2	ENCSR614NPG	GSE91301	tim-reddy:H3K27ac.t2_rep2_chip_seq_bigWig	ENCFF139POK	N/A
ChIP-seq	tim-reddy:H3K27ac.t2	ENCSR614NPG	GSE91301	tim-reddy:H3K27ac.t2_rep2_chip_seq_fastq	ENCFF416COP	SRR5093022
ChIP-seq	tim-reddy:H3K27ac.t2	ENCSR614NPG	GSE91301	tim-reddy:H3K27ac.t2_rep2_chip_seq_narrowPeak	ENCFF735JXL	N/A
ChIP-seq	tim-reddy:H3K27ac.t2	ENCSR614NPG	GSE91301	tim-reddy:H3K27ac.t2_rep3_chip_seq_bam	ENCFF971GAQ	N/A
ChIP-seq	tim-reddy:H3K27ac.t2	ENCSR614NPG	GSE91301	tim-reddy:H3K27ac.t2_rep3_chip_seq_bigWig	ENCFF196TMZ	N/A
ChIP-seq	tim-reddy:H3K27ac.t2	ENCSR614NPG	GSE91301	tim-reddy:H3K27ac.t2_rep3_chip_seq_fastq	ENCFF419LDG	SRR5093021
ChIP-seq	tim-reddy:H3K27ac.t2	ENCSR614NPG	GSE91301	tim-reddy:H3K27ac.t2_rep3_chip_seq_narrowPeak	ENCFF335GGC	N/A
ChIP-seq	tim-reddy:H3K27ac.t3	ENCSR350EFV	GSE91248	tim-reddy:H3K27ac.t3_rep1_chip_seq_bam	ENCFF999CWD	N/A
ChIP-seq	tim-reddy:H3K27ac.t3	ENCSR350EFV	GSE91248	tim-reddy:H3K27ac.t3_rep1_chip_seq_bigWig	ENCFF111PEK	N/A
ChIP-seq	tim-reddy:H3K27ac.t3	ENCSR350EFV	GSE91248	tim-reddy:H3K27ac.t3_rep1_chip_seq_fastq	ENCFF862BBX	SRR5093425
ChIP-seq	tim-reddy:H3K27ac.t3	ENCSR350EFV	GSE91248	tim-reddy:H3K27ac.t3_rep1_chip_seq_narrowPeak	ENCFF334NIR	N/A
ChIP-seq	tim-reddy:H3K27ac.t3	ENCSR350EFV	GSE91248	tim-reddy:H3K27ac.t3_rep2_chip_seq_bam	ENCFF823TDC	N/A
ChIP-seq	tim-reddy:H3K27ac.t3	ENCSR350EFV	GSE91248	tim-reddy:H3K27ac.t3_rep2_chip_seq_bigWig	ENCFF124OPP	N/A
ChIP-seq	tim-reddy:H3K27ac.t3	ENCSR350EFV	GSE91248	tim-reddy:H3K27ac.t3_rep2_chip_seq_fastq	ENCFF974OQD	SRR5093423
ChIP-seq	tim-reddy:H3K27ac.t3	ENCSR350EFV	GSE91248	tim-reddy:H3K27ac.t3_rep2_chip_seq_narrowPeak	ENCFF715EXP	N/A
ChIP-seq	tim-reddy:H3K27ac.t3	ENCSR350EFV	GSE91248	tim-reddy:H3K27ac.t3_rep3_chip_seq_bam	ENCFF181LTB	N/A
ChIP-seq	tim-reddy:H3K27ac.t3	ENCSR350EFV	GSE91248	tim-reddy:H3K27ac.t3_rep3_chip_seq_bigWig	ENCFF886ITB	N/A
ChIP-seq	tim-reddy:H3K27ac.t3	ENCSR350EFV	GSE91248	tim-reddy:H3K27ac.t3_rep3_chip_seq_fastq	ENCFF886DEN	SRR5093424
ChIP-seq	tim-reddy:H3K27ac.t3	ENCSR350EFV	GSE91248	tim-reddy:H3K27ac.t3_rep3_chip_seq_narrowPeak	ENCFF609QTX	N/A
ChIP-seq	tim-reddy:H3K27ac.t4	ENCSR543ZVZ	GSE91282	tim-reddy:H3K27ac.t4_rep1_chip_seq_bam	ENCFF090QVY	N/A
ChIP-seq	tim-reddy:H3K27ac.t4	ENCSR543ZVZ	GSE91282	tim-reddy:H3K27ac.t4_rep1_chip_seq_bigWig	ENCFF125WVK	N/A
ChIP-seq	tim-reddy:H3K27ac.t4	ENCSR543ZVZ	GSE91282	tim-reddy:H3K27ac.t4_rep1_chip_seq_fastq	ENCFF898WZH	SRR5092965
ChIP-seq	tim-reddy:H3K27ac.t4	ENCSR543ZVZ	GSE91282	tim-reddy:H3K27ac.t4_rep1_chip_seq_narrowPeak	ENCFF788FTA	N/A
ChIP-seq	tim-reddy:H3K27ac.t4	ENCSR543ZVZ	GSE91282	tim-reddy:H3K27ac.t4_rep2_chip_seq_bam	ENCFF109VEX	N/A
ChIP-seq	tim-reddy:H3K27ac.t4	ENCSR543ZVZ	GSE91282	tim-reddy:H3K27ac.t4_rep2_chip_seq_bigWig	ENCFF256KJY	N/A
ChIP-seq	tim-reddy:H3K27ac.t4	ENCSR543ZVZ	GSE91282	tim-reddy:H3K27ac.t4_rep2_chip_seq_fastq	ENCFF515KIN	SRR5092963
ChIP-seq	tim-reddy:H3K27ac.t4	ENCSR543ZVZ	GSE91282	tim-reddy:H3K27ac.t4_rep2_chip_seq_narrowPeak	ENCFF233HVV	N/A
ChIP-seq	tim-reddy:H3K27ac.t4	ENCSR543ZVZ	GSE91282	tim-reddy:H3K27ac.t4_rep3_chip_seq_bam	ENCFF706SEA	N/A
ChIP-seq	tim-reddy:H3K27ac.t4	ENCSR543ZVZ	GSE91282	tim-reddy:H3K27ac.t4_rep3_chip_seq_bigWig	ENCFF087ZEH	N/A
ChIP-seq	tim-reddy:H3K27ac.t4	ENCSR543ZVZ	GSE91282	tim-reddy:H3K27ac.t4_rep3_chip_seq_fastq	ENCFF090HXB	SRR5092964
ChIP-seq	tim-reddy:H3K27ac.t4	ENCSR543ZVZ	GSE91282	tim-reddy:H3K27ac.t4_rep3_chip_seq_narrowPeak	ENCFF241DYS	N/A
ChIP-seq	tim-reddy:H3K27ac.t5	ENCSR716XDB	GSE91326	tim-reddy:H3K27ac.t5_rep1_chip_seq_bam	ENCFF912SQL	N/A
ChIP-seq	tim-reddy:H3K27ac.t5	ENCSR716XDB	GSE91326	tim-reddy:H3K27ac.t5_rep1_chip_seq_bigWig	ENCFF339MNC	N/A
ChIP-seq	tim-reddy:H3K27ac.t5	ENCSR716XDB	GSE91326	tim-reddy:H3K27ac.t5_rep1_chip_seq_fastq	ENCFF077CPX	SRR5093098
ChIP-seq	tim-reddy:H3K27ac.t5	ENCSR716XDB	GSE91326	tim-reddy:H3K27ac.t5_rep1_chip_seq_narrowPeak	ENCFF580DIV	N/A
ChIP-seq	tim-reddy:H3K27ac.t5	ENCSR716XDB	GSE91326	tim-reddy:H3K27ac.t5_rep2_chip_seq_bam	ENCFF124MGT	N/A
ChIP-seq	tim-reddy:H3K27ac.t5	ENCSR716XDB	GSE91326	tim-reddy:H3K27ac.t5_rep2_chip_seq_bigWig	ENCFF753WSS	N/A
ChIP-seq	tim-reddy:H3K27ac.t5	ENCSR716XDB	GSE91326	tim-reddy:H3K27ac.t5_rep2_chip_seq_fastq	ENCFF160TGH	SRR5093096
ChIP-seq	tim-reddy:H3K27ac.t5	ENCSR716XDB	GSE91326	tim-reddy:H3K27ac.t5_rep2_chip_seq_narrowPeak	ENCFF905WQE	N/A
ChIP-seq	tim-reddy:H3K27ac.t5	ENCSR716XDB	GSE91326	tim-reddy:H3K27ac.t5_rep3_chip_seq_bam	ENCFF822QUG	N/A
ChIP-seq	tim-reddy:H3K27ac.t5	ENCSR716XDB	GSE91326	tim-reddy:H3K27ac.t5_rep3_chip_seq_bigWig	ENCFF876EHL	N/A
ChIP-seq	tim-reddy:H3K27ac.t5	ENCSR716XDB	GSE91326	tim-reddy:H3K27ac.t5_rep3_chip_seq_fastq	ENCFF468QOE	SRR5093097
ChIP-seq	tim-reddy:H3K27ac.t5	ENCSR716XDB	GSE91326	tim-reddy:H3K27ac.t5_rep3_chip_seq_narrowPeak	ENCFF775VXR	N/A
ChIP-seq	tim-reddy:H3K27ac.t6	ENCSR340NAL	GSE91245	tim-reddy:H3K27ac.t6_rep1_chip_seq_bam	ENCFF739WQL	N/A
ChIP-seq	tim-reddy:H3K27ac.t6	ENCSR340NAL	GSE91245	tim-reddy:H3K27ac.t6_rep1_chip_seq_bigWig	ENCFF662NPT	N/A
ChIP-seq	tim-reddy:H3K27ac.t6	ENCSR340NAL	GSE91245	tim-reddy:H3K27ac.t6_rep1_chip_seq_fastq	ENCFF860PUC	SRR5093421
ChIP-seq	tim-reddy:H3K27ac.t6	ENCSR340NAL	GSE91245	tim-reddy:H3K27ac.t6_rep1_chip_seq_narrowPeak	ENCFF374SFB	N/A
ChIP-seq	tim-reddy:H3K27ac.t6	ENCSR340NAL	GSE91245	tim-reddy:H3K27ac.t6_rep2_chip_seq_bam	ENCFF552CRZ	N/A
ChIP-seq	tim-reddy:H3K27ac.t6	ENCSR340NAL	GSE91245	tim-reddy:H3K27ac.t6_rep2_chip_seq_bigWig	ENCFF816FLW	N/A
ChIP-seq	tim-reddy:H3K27ac.t6	ENCSR340NAL	GSE91245	tim-reddy:H3K27ac.t6_rep2_chip_seq_fastq	ENCFF362GWT	SRR5093420
ChIP-seq	tim-reddy:H3K27ac.t6	ENCSR340NAL	GSE91245	tim-reddy:H3K27ac.t6_rep2_chip_seq_narrowPeak	ENCFF141JRF	N/A
ChIP-seq	tim-reddy:H3K27ac.t6	ENCSR340NAL	GSE91245	tim-reddy:H3K27ac.t6_rep3_chip_seq_bam	ENCFF896WEA	N/A
ChIP-seq	tim-reddy:H3K27ac.t6	ENCSR340NAL	GSE91245	tim-reddy:H3K27ac.t6_rep3_chip_seq_bigWig	ENCFF130ZEG	N/A
ChIP-seq	tim-reddy:H3K27ac.t6	ENCSR340NAL	GSE91245	tim-reddy:H3K27ac.t6_rep3_chip_seq_fastq	ENCFF175INS	SRR5093422
ChIP-seq	tim-reddy:H3K27ac.t6	ENCSR340NAL	GSE91245	tim-reddy:H3K27ac.t6_rep3_chip_seq_narrowPeak	ENCFF496IHQ	N/A
ChIP-seq	tim-reddy:H3K27ac.t7	ENCSR569IBY	GSE91292	tim-reddy:H3K27ac.t7_rep1_chip_seq_bam	ENCFF382BTL	N/A
ChIP-seq	tim-reddy:H3K27ac.t7	ENCSR569IBY	GSE91292	tim-reddy:H3K27ac.t7_rep1_chip_seq_bigWig	ENCFF935QYK	N/A
ChIP-seq	tim-reddy:H3K27ac.t7	ENCSR569IBY	GSE91292	tim-reddy:H3K27ac.t7_rep1_chip_seq_fastq	ENCFF767ZJC	SRR5092997
ChIP-seq	tim-reddy:H3K27ac.t7	ENCSR569IBY	GSE91292	tim-reddy:H3K27ac.t7_rep1_chip_seq_narrowPeak	ENCFF321CGZ	N/A
ChIP-seq	tim-reddy:H3K27ac.t7	ENCSR569IBY	GSE91292	tim-reddy:H3K27ac.t7_rep2_chip_seq_bam	ENCFF942DTR	N/A
ChIP-seq	tim-reddy:H3K27ac.t7	ENCSR569IBY	GSE91292	tim-reddy:H3K27ac.t7_rep2_chip_seq_bigWig	ENCFF932CFZ	N/A
ChIP-seq	tim-reddy:H3K27ac.t7	ENCSR569IBY	GSE91292	tim-reddy:H3K27ac.t7_rep2_chip_seq_fastq	ENCFF491HHW	SRR5092998
ChIP-seq	tim-reddy:H3K27ac.t7	ENCSR569IBY	GSE91292	tim-reddy:H3K27ac.t7_rep2_chip_seq_narrowPeak	ENCFF720ICR	N/A
ChIP-seq	tim-reddy:H3K27ac.t7	ENCSR569IBY	GSE91292	tim-reddy:H3K27ac.t7_rep3_chip_seq_bam	ENCFF418MPX	N/A
ChIP-seq	tim-reddy:H3K27ac.t7	ENCSR569IBY	GSE91292	tim-reddy:H3K27ac.t7_rep3_chip_seq_bigWig	ENCFF914HNL	N/A
ChIP-seq	tim-reddy:H3K27ac.t7	ENCSR569IBY	GSE91292	tim-reddy:H3K27ac.t7_rep3_chip_seq_fastq	ENCFF945TBK	SRR5092999
ChIP-seq	tim-reddy:H3K27ac.t7	ENCSR569IBY	GSE91292	tim-reddy:H3K27ac.t7_rep3_chip_seq_narrowPeak	ENCFF464XNO	N/A
ChIP-seq	tim-reddy:H3K27ac.t8	ENCSR250EHC	GSE91226	tim-reddy:H3K27ac.t8_rep1_chip_seq_bam	ENCFF674GOX	N/A
ChIP-seq	tim-reddy:H3K27ac.t8	ENCSR250EHC	GSE91226	tim-reddy:H3K27ac.t8_rep1_chip_seq_bigWig	ENCFF750XSG	N/A
ChIP-seq	tim-reddy:H3K27ac.t8	ENCSR250EHC	GSE91226	tim-reddy:H3K27ac.t8_rep1_chip_seq_fastq	ENCFF579OTF	SRR5093362
ChIP-seq	tim-reddy:H3K27ac.t8	ENCSR250EHC	GSE91226	tim-reddy:H3K27ac.t8_rep1_chip_seq_narrowPeak	ENCFF188YLW	N/A
ChIP-seq	tim-reddy:H3K27ac.t8	ENCSR250EHC	GSE91226	tim-reddy:H3K27ac.t8_rep2_chip_seq_bam	ENCFF360VSU	N/A
ChIP-seq	tim-reddy:H3K27ac.t8	ENCSR250EHC	GSE91226	tim-reddy:H3K27ac.t8_rep2_chip_seq_bigWig	ENCFF871PNZ	N/A
ChIP-seq	tim-reddy:H3K27ac.t8	ENCSR250EHC	GSE91226	tim-reddy:H3K27ac.t8_rep2_chip_seq_fastq	ENCFF859DPQ	SRR5093363
ChIP-seq	tim-reddy:H3K27ac.t8	ENCSR250EHC	GSE91226	tim-reddy:H3K27ac.t8_rep2_chip_seq_narrowPeak	ENCFF024NUM	N/A
ChIP-seq	tim-reddy:H3K4me1.t00	ENCSR636PIN	GSE91306	tim-reddy:H3K4me1.t00_rep1_chip_seq_bam	ENCFF890SHO	N/A
ChIP-seq	tim-reddy:H3K4me1.t00	ENCSR636PIN	GSE91306	tim-reddy:H3K4me1.t00_rep1_chip_seq_bigWig	ENCFF848DUD	N/A
ChIP-seq	tim-reddy:H3K4me1.t00	ENCSR636PIN	GSE91306	tim-reddy:H3K4me1.t00_rep1_chip_seq_fastq	ENCFF660AKA	SRR5093031
ChIP-seq	tim-reddy:H3K4me1.t00	ENCSR636PIN	GSE91306	tim-reddy:H3K4me1.t00_rep1_chip_seq_narrowPeak	ENCFF872XNX	N/A
ChIP-seq	tim-reddy:H3K4me1.t00	ENCSR636PIN	GSE91306	tim-reddy:H3K4me1.t00_rep2_chip_seq_bam	ENCFF102ZYB	N/A
ChIP-seq	tim-reddy:H3K4me1.t00	ENCSR636PIN	GSE91306	tim-reddy:H3K4me1.t00_rep2_chip_seq_bigWig	ENCFF074MWW	N/A
ChIP-seq	tim-reddy:H3K4me1.t00	ENCSR636PIN	GSE91306	tim-reddy:H3K4me1.t00_rep2_chip_seq_fastq	ENCFF789SAF	SRR5093030
ChIP-seq	tim-reddy:H3K4me1.t00	ENCSR636PIN	GSE91306	tim-reddy:H3K4me1.t00_rep2_chip_seq_narrowPeak	ENCFF209CGO	N/A
ChIP-seq	tim-reddy:H3K4me1.t00	ENCSR636PIN	GSE91306	tim-reddy:H3K4me1.t00_rep3_chip_seq_bam	ENCFF504ORJ	N/A
ChIP-seq	tim-reddy:H3K4me1.t00	ENCSR636PIN	GSE91306	tim-reddy:H3K4me1.t00_rep3_chip_seq_bigWig	ENCFF861BVR	N/A
ChIP-seq	tim-reddy:H3K4me1.t00	ENCSR636PIN	GSE91306	tim-reddy:H3K4me1.t00_rep3_chip_seq_fastq	ENCFF654DWA	SRR5093032
ChIP-seq	tim-reddy:H3K4me1.t00	ENCSR636PIN	GSE91306	tim-reddy:H3K4me1.t00_rep3_chip_seq_narrowPeak	ENCFF276ZZL	N/A
ChIP-seq	tim-reddy:H3K4me1.t05	ENCSR593RGY	GSE91294	tim-reddy:H3K4me1.t05_rep1_chip_seq_bam	ENCFF599IDB	N/A
ChIP-seq	tim-reddy:H3K4me1.t05	ENCSR593RGY	GSE91294	tim-reddy:H3K4me1.t05_rep1_chip_seq_bigWig	ENCFF338BWP	N/A
ChIP-seq	tim-reddy:H3K4me1.t05	ENCSR593RGY	GSE91294	tim-reddy:H3K4me1.t05_rep1_chip_seq_fastq	ENCFF471EAN	SRR5093004
ChIP-seq	tim-reddy:H3K4me1.t05	ENCSR593RGY	GSE91294	tim-reddy:H3K4me1.t05_rep1_chip_seq_narrowPeak	ENCFF942LHQ	N/A
ChIP-seq	tim-reddy:H3K4me1.t05	ENCSR593RGY	GSE91294	tim-reddy:H3K4me1.t05_rep2_chip_seq_bam	ENCFF942KHY	N/A
ChIP-seq	tim-reddy:H3K4me1.t05	ENCSR593RGY	GSE91294	tim-reddy:H3K4me1.t05_rep2_chip_seq_bigWig	ENCFF774NBF	N/A
ChIP-seq	tim-reddy:H3K4me1.t05	ENCSR593RGY	GSE91294	tim-reddy:H3K4me1.t05_rep2_chip_seq_fastq	ENCFF797WYW	SRR5093005
ChIP-seq	tim-reddy:H3K4me1.t05	ENCSR593RGY	GSE91294	tim-reddy:H3K4me1.t05_rep2_chip_seq_narrowPeak	ENCFF038XGZ	N/A
ChIP-seq	tim-reddy:H3K4me1.t05	ENCSR593RGY	GSE91294	tim-reddy:H3K4me1.t05_rep3_chip_seq_bam	ENCFF375RFJ	N/A
ChIP-seq	tim-reddy:H3K4me1.t05	ENCSR593RGY	GSE91294	tim-reddy:H3K4me1.t05_rep3_chip_seq_bigWig	ENCFF896FLA	N/A
ChIP-seq	tim-reddy:H3K4me1.t05	ENCSR593RGY	GSE91294	tim-reddy:H3K4me1.t05_rep3_chip_seq_fastq	ENCFF952FMY	SRR5093006
ChIP-seq	tim-reddy:H3K4me1.t05	ENCSR593RGY	GSE91294	tim-reddy:H3K4me1.t05_rep3_chip_seq_narrowPeak	ENCFF576WUQ	N/A
ChIP-seq	tim-reddy:H3K4me1.t10	ENCSR954HUB	GSE91366	tim-reddy:H3K4me1.t10_rep1_chip_seq_bam	ENCFF044QCC	N/A
ChIP-seq	tim-reddy:H3K4me1.t10	ENCSR954HUB	GSE91366	tim-reddy:H3K4me1.t10_rep1_chip_seq_bigWig	ENCFF295CZN	N/A
ChIP-seq	tim-reddy:H3K4me1.t10	ENCSR954HUB	GSE91366	tim-reddy:H3K4me1.t10_rep1_chip_seq_fastq	ENCFF659VLH	SRR5093215
ChIP-seq	tim-reddy:H3K4me1.t10	ENCSR954HUB	GSE91366	tim-reddy:H3K4me1.t10_rep1_chip_seq_narrowPeak	ENCFF741OTF	N/A
ChIP-seq	tim-reddy:H3K4me1.t10	ENCSR954HUB	GSE91366	tim-reddy:H3K4me1.t10_rep2_chip_seq_bam	ENCFF579CQR	N/A
ChIP-seq	tim-reddy:H3K4me1.t10	ENCSR954HUB	GSE91366	tim-reddy:H3K4me1.t10_rep2_chip_seq_bigWig	ENCFF401NAN	N/A
ChIP-seq	tim-reddy:H3K4me1.t10	ENCSR954HUB	GSE91366	tim-reddy:H3K4me1.t10_rep2_chip_seq_fastq	ENCFF192ZGO	SRR5093216
ChIP-seq	tim-reddy:H3K4me1.t10	ENCSR954HUB	GSE91366	tim-reddy:H3K4me1.t10_rep2_chip_seq_narrowPeak	ENCFF749VMN	N/A
ChIP-seq	tim-reddy:H3K4me1.t10	ENCSR954HUB	GSE91366	tim-reddy:H3K4me1.t10_rep3_chip_seq_bam	ENCFF441AVY	N/A
ChIP-seq	tim-reddy:H3K4me1.t10	ENCSR954HUB	GSE91366	tim-reddy:H3K4me1.t10_rep3_chip_seq_bigWig	ENCFF155IPH	N/A
ChIP-seq	tim-reddy:H3K4me1.t10	ENCSR954HUB	GSE91366	tim-reddy:H3K4me1.t10_rep3_chip_seq_fastq	ENCFF584NSQ	SRR5093214
ChIP-seq	tim-reddy:H3K4me1.t10	ENCSR954HUB	GSE91366	tim-reddy:H3K4me1.t10_rep3_chip_seq_narrowPeak	ENCFF717UAR	N/A
ChIP-seq	tim-reddy:H3K4me1.t12	ENCSR529YKU	GSE91278	tim-reddy:H3K4me1.t12_rep1_chip_seq_bam	ENCFF522NMW	N/A
ChIP-seq	tim-reddy:H3K4me1.t12	ENCSR529YKU	GSE91278	tim-reddy:H3K4me1.t12_rep1_chip_seq_bigWig	ENCFF608BVI	N/A
ChIP-seq	tim-reddy:H3K4me1.t12	ENCSR529YKU	GSE91278	tim-reddy:H3K4me1.t12_rep1_chip_seq_fastq	ENCFF052DPD	SRR5092952
ChIP-seq	tim-reddy:H3K4me1.t12	ENCSR529YKU	GSE91278	tim-reddy:H3K4me1.t12_rep1_chip_seq_narrowPeak	ENCFF673KIF	N/A
ChIP-seq	tim-reddy:H3K4me1.t12	ENCSR529YKU	GSE91278	tim-reddy:H3K4me1.t12_rep2_chip_seq_bam	ENCFF079BRB	N/A
ChIP-seq	tim-reddy:H3K4me1.t12	ENCSR529YKU	GSE91278	tim-reddy:H3K4me1.t12_rep2_chip_seq_bigWig	ENCFF531TZY	N/A
ChIP-seq	tim-reddy:H3K4me1.t12	ENCSR529YKU	GSE91278	tim-reddy:H3K4me1.t12_rep2_chip_seq_fastq	ENCFF726ZWD	SRR5092953
ChIP-seq	tim-reddy:H3K4me1.t12	ENCSR529YKU	GSE91278	tim-reddy:H3K4me1.t12_rep2_chip_seq_narrowPeak	ENCFF146EJE	N/A
ChIP-seq	tim-reddy:H3K4me1.t12	ENCSR529YKU	GSE91278	tim-reddy:H3K4me1.t12_rep3_chip_seq_bam	ENCFF023YOA	N/A
ChIP-seq	tim-reddy:H3K4me1.t12	ENCSR529YKU	GSE91278	tim-reddy:H3K4me1.t12_rep3_chip_seq_bigWig	ENCFF576XAE	N/A
ChIP-seq	tim-reddy:H3K4me1.t12	ENCSR529YKU	GSE91278	tim-reddy:H3K4me1.t12_rep3_chip_seq_fastq	ENCFF500UQL	SRR5092951
ChIP-seq	tim-reddy:H3K4me1.t12	ENCSR529YKU	GSE91278	tim-reddy:H3K4me1.t12_rep3_chip_seq_narrowPeak	ENCFF326WBC	N/A
ChIP-seq	tim-reddy:H3K4me1.t1	ENCSR537FVU	GSE91280	tim-reddy:H3K4me1.t1_rep1_chip_seq_bam	ENCFF508YTO	N/A
ChIP-seq	tim-reddy:H3K4me1.t1	ENCSR537FVU	GSE91280	tim-reddy:H3K4me1.t1_rep1_chip_seq_bigWig	ENCFF263EKG	N/A
ChIP-seq	tim-reddy:H3K4me1.t1	ENCSR537FVU	GSE91280	tim-reddy:H3K4me1.t1_rep1_chip_seq_fastq	ENCFF540BQT	SRR5092957
ChIP-seq	tim-reddy:H3K4me1.t1	ENCSR537FVU	GSE91280	tim-reddy:H3K4me1.t1_rep1_chip_seq_narrowPeak	ENCFF603EZL	N/A
ChIP-seq	tim-reddy:H3K4me1.t1	ENCSR537FVU	GSE91280	tim-reddy:H3K4me1.t1_rep2_chip_seq_bam	ENCFF713MXG	N/A
ChIP-seq	tim-reddy:H3K4me1.t1	ENCSR537FVU	GSE91280	tim-reddy:H3K4me1.t1_rep2_chip_seq_bigWig	ENCFF710BQD	N/A
ChIP-seq	tim-reddy:H3K4me1.t1	ENCSR537FVU	GSE91280	tim-reddy:H3K4me1.t1_rep2_chip_seq_fastq	ENCFF130RSW	SRR5092958
ChIP-seq	tim-reddy:H3K4me1.t1	ENCSR537FVU	GSE91280	tim-reddy:H3K4me1.t1_rep2_chip_seq_narrowPeak	ENCFF679FXB	N/A
ChIP-seq	tim-reddy:H3K4me1.t1	ENCSR537FVU	GSE91280	tim-reddy:H3K4me1.t1_rep3_chip_seq_bam	ENCFF250ESH	N/A
ChIP-seq	tim-reddy:H3K4me1.t1	ENCSR537FVU	GSE91280	tim-reddy:H3K4me1.t1_rep3_chip_seq_bigWig	ENCFF101YXN	N/A
ChIP-seq	tim-reddy:H3K4me1.t1	ENCSR537FVU	GSE91280	tim-reddy:H3K4me1.t1_rep3_chip_seq_fastq	ENCFF083KCD	SRR5092959
ChIP-seq	tim-reddy:H3K4me1.t1	ENCSR537FVU	GSE91280	tim-reddy:H3K4me1.t1_rep3_chip_seq_narrowPeak	ENCFF497DZK	N/A
ChIP-seq	tim-reddy:H3K4me1.t2	ENCSR726MAP	GSE91328	tim-reddy:H3K4me1.t2_rep1_chip_seq_bam	ENCFF568FZN	N/A
ChIP-seq	tim-reddy:H3K4me1.t2	ENCSR726MAP	GSE91328	tim-reddy:H3K4me1.t2_rep1_chip_seq_bigWig	ENCFF231WSQ	N/A
ChIP-seq	tim-reddy:H3K4me1.t2	ENCSR726MAP	GSE91328	tim-reddy:H3K4me1.t2_rep1_chip_seq_fastq	ENCFF177CBA	SRR5093103
ChIP-seq	tim-reddy:H3K4me1.t2	ENCSR726MAP	GSE91328	tim-reddy:H3K4me1.t2_rep1_chip_seq_narrowPeak	ENCFF559IFU	N/A
ChIP-seq	tim-reddy:H3K4me1.t2	ENCSR726MAP	GSE91328	tim-reddy:H3K4me1.t2_rep2_chip_seq_bam	ENCFF316UCE	N/A
ChIP-seq	tim-reddy:H3K4me1.t2	ENCSR726MAP	GSE91328	tim-reddy:H3K4me1.t2_rep2_chip_seq_bigWig	ENCFF861ZZY	N/A
ChIP-seq	tim-reddy:H3K4me1.t2	ENCSR726MAP	GSE91328	tim-reddy:H3K4me1.t2_rep2_chip_seq_fastq	ENCFF910NIN	SRR5093104
ChIP-seq	tim-reddy:H3K4me1.t2	ENCSR726MAP	GSE91328	tim-reddy:H3K4me1.t2_rep2_chip_seq_narrowPeak	ENCFF660HBW	N/A
ChIP-seq	tim-reddy:H3K4me1.t2	ENCSR726MAP	GSE91328	tim-reddy:H3K4me1.t2_rep3_chip_seq_bam	ENCFF279IGL	N/A
ChIP-seq	tim-reddy:H3K4me1.t2	ENCSR726MAP	GSE91328	tim-reddy:H3K4me1.t2_rep3_chip_seq_bigWig	ENCFF956XGK	N/A
ChIP-seq	tim-reddy:H3K4me1.t2	ENCSR726MAP	GSE91328	tim-reddy:H3K4me1.t2_rep3_chip_seq_fastq	ENCFF751UWW	SRR5093102
ChIP-seq	tim-reddy:H3K4me1.t2	ENCSR726MAP	GSE91328	tim-reddy:H3K4me1.t2_rep3_chip_seq_narrowPeak	ENCFF628NJK	N/A
ChIP-seq	tim-reddy:H3K4me1.t3	ENCSR171ZJG	GSE91213	tim-reddy:H3K4me1.t3_rep1_chip_seq_bam	ENCFF743NKB	N/A
ChIP-seq	tim-reddy:H3K4me1.t3	ENCSR171ZJG	GSE91213	tim-reddy:H3K4me1.t3_rep1_chip_seq_bigWig	ENCFF827IEU	N/A
ChIP-seq	tim-reddy:H3K4me1.t3	ENCSR171ZJG	GSE91213	tim-reddy:H3K4me1.t3_rep1_chip_seq_fastq	ENCFF843ACU	SRR5093323
ChIP-seq	tim-reddy:H3K4me1.t3	ENCSR171ZJG	GSE91213	tim-reddy:H3K4me1.t3_rep1_chip_seq_narrowPeak	ENCFF231EHC	N/A
ChIP-seq	tim-reddy:H3K4me1.t3	ENCSR171ZJG	GSE91213	tim-reddy:H3K4me1.t3_rep2_chip_seq_bam	ENCFF891QIF	N/A
ChIP-seq	tim-reddy:H3K4me1.t3	ENCSR171ZJG	GSE91213	tim-reddy:H3K4me1.t3_rep2_chip_seq_bigWig	ENCFF964ULX	N/A
ChIP-seq	tim-reddy:H3K4me1.t3	ENCSR171ZJG	GSE91213	tim-reddy:H3K4me1.t3_rep2_chip_seq_fastq	ENCFF007VKS	SRR5093322
ChIP-seq	tim-reddy:H3K4me1.t3	ENCSR171ZJG	GSE91213	tim-reddy:H3K4me1.t3_rep2_chip_seq_narrowPeak	ENCFF328DME	N/A
ChIP-seq	tim-reddy:H3K4me1.t3	ENCSR171ZJG	GSE91213	tim-reddy:H3K4me1.t3_rep3_chip_seq_bam	ENCFF099FCT	N/A
ChIP-seq	tim-reddy:H3K4me1.t3	ENCSR171ZJG	GSE91213	tim-reddy:H3K4me1.t3_rep3_chip_seq_bigWig	ENCFF168DNY	N/A
ChIP-seq	tim-reddy:H3K4me1.t3	ENCSR171ZJG	GSE91213	tim-reddy:H3K4me1.t3_rep3_chip_seq_fastq	ENCFF620HQT	SRR5093321
ChIP-seq	tim-reddy:H3K4me1.t3	ENCSR171ZJG	GSE91213	tim-reddy:H3K4me1.t3_rep3_chip_seq_narrowPeak	ENCFF164DMI	N/A
ChIP-seq	tim-reddy:H3K4me1.t4	ENCSR949IDI	GSE91363	tim-reddy:H3K4me1.t4_rep1_chip_seq_bam	ENCFF071TYI	N/A
ChIP-seq	tim-reddy:H3K4me1.t4	ENCSR949IDI	GSE91363	tim-reddy:H3K4me1.t4_rep1_chip_seq_bigWig	ENCFF854IKI	N/A
ChIP-seq	tim-reddy:H3K4me1.t4	ENCSR949IDI	GSE91363	tim-reddy:H3K4me1.t4_rep1_chip_seq_fastq	ENCFF594JPY	SRR5093206
ChIP-seq	tim-reddy:H3K4me1.t4	ENCSR949IDI	GSE91363	tim-reddy:H3K4me1.t4_rep1_chip_seq_narrowPeak	ENCFF177COH	N/A
ChIP-seq	tim-reddy:H3K4me1.t4	ENCSR949IDI	GSE91363	tim-reddy:H3K4me1.t4_rep2_chip_seq_bam	ENCFF645BED	N/A
ChIP-seq	tim-reddy:H3K4me1.t4	ENCSR949IDI	GSE91363	tim-reddy:H3K4me1.t4_rep2_chip_seq_bigWig	ENCFF442KUB	N/A
ChIP-seq	tim-reddy:H3K4me1.t4	ENCSR949IDI	GSE91363	tim-reddy:H3K4me1.t4_rep2_chip_seq_fastq	ENCFF955ABR	SRR5093205
ChIP-seq	tim-reddy:H3K4me1.t4	ENCSR949IDI	GSE91363	tim-reddy:H3K4me1.t4_rep2_chip_seq_narrowPeak	ENCFF875JCS	N/A
ChIP-seq	tim-reddy:H3K4me1.t4	ENCSR949IDI	GSE91363	tim-reddy:H3K4me1.t4_rep3_chip_seq_bam	ENCFF622FCC	N/A
ChIP-seq	tim-reddy:H3K4me1.t4	ENCSR949IDI	GSE91363	tim-reddy:H3K4me1.t4_rep3_chip_seq_bigWig	ENCFF269NXH	N/A
ChIP-seq	tim-reddy:H3K4me1.t4	ENCSR949IDI	GSE91363	tim-reddy:H3K4me1.t4_rep3_chip_seq_fastq	ENCFF713FSS	SRR5093207
ChIP-seq	tim-reddy:H3K4me1.t4	ENCSR949IDI	GSE91363	tim-reddy:H3K4me1.t4_rep3_chip_seq_narrowPeak	ENCFF665VDZ	N/A
ChIP-seq	tim-reddy:H3K4me1.t5	ENCSR225AOO	GSE91223	tim-reddy:H3K4me1.t5_rep1_chip_seq_bam	ENCFF109JVX	N/A
ChIP-seq	tim-reddy:H3K4me1.t5	ENCSR225AOO	GSE91223	tim-reddy:H3K4me1.t5_rep1_chip_seq_bigWig	ENCFF162TOF	N/A
ChIP-seq	tim-reddy:H3K4me1.t5	ENCSR225AOO	GSE91223	tim-reddy:H3K4me1.t5_rep1_chip_seq_fastq	ENCFF964AOV	SRR5093354
ChIP-seq	tim-reddy:H3K4me1.t5	ENCSR225AOO	GSE91223	tim-reddy:H3K4me1.t5_rep1_chip_seq_narrowPeak	ENCFF326BCB	N/A
ChIP-seq	tim-reddy:H3K4me1.t5	ENCSR225AOO	GSE91223	tim-reddy:H3K4me1.t5_rep2_chip_seq_bam	ENCFF490LYA	N/A
ChIP-seq	tim-reddy:H3K4me1.t5	ENCSR225AOO	GSE91223	tim-reddy:H3K4me1.t5_rep2_chip_seq_bigWig	ENCFF097NQN	N/A
ChIP-seq	tim-reddy:H3K4me1.t5	ENCSR225AOO	GSE91223	tim-reddy:H3K4me1.t5_rep2_chip_seq_fastq	ENCFF342DEI	SRR5093353
ChIP-seq	tim-reddy:H3K4me1.t5	ENCSR225AOO	GSE91223	tim-reddy:H3K4me1.t5_rep2_chip_seq_narrowPeak	ENCFF711QTV	N/A
ChIP-seq	tim-reddy:H3K4me1.t5	ENCSR225AOO	GSE91223	tim-reddy:H3K4me1.t5_rep3_chip_seq_bam	ENCFF687ROY	N/A
ChIP-seq	tim-reddy:H3K4me1.t5	ENCSR225AOO	GSE91223	tim-reddy:H3K4me1.t5_rep3_chip_seq_bigWig	ENCFF235OYC	N/A
ChIP-seq	tim-reddy:H3K4me1.t5	ENCSR225AOO	GSE91223	tim-reddy:H3K4me1.t5_rep3_chip_seq_fastq	ENCFF267MOE	SRR5093355
ChIP-seq	tim-reddy:H3K4me1.t5	ENCSR225AOO	GSE91223	tim-reddy:H3K4me1.t5_rep3_chip_seq_narrowPeak	ENCFF854PVQ	N/A
ChIP-seq	tim-reddy:H3K4me1.t6	ENCSR868MLT	GSE91346	tim-reddy:H3K4me1.t6_rep1_chip_seq_bam	ENCFF860DHM	N/A
ChIP-seq	tim-reddy:H3K4me1.t6	ENCSR868MLT	GSE91346	tim-reddy:H3K4me1.t6_rep1_chip_seq_bigWig	ENCFF275UXR	N/A
ChIP-seq	tim-reddy:H3K4me1.t6	ENCSR868MLT	GSE91346	tim-reddy:H3K4me1.t6_rep1_chip_seq_fastq	ENCFF732KHN	SRR5093155
ChIP-seq	tim-reddy:H3K4me1.t6	ENCSR868MLT	GSE91346	tim-reddy:H3K4me1.t6_rep1_chip_seq_narrowPeak	ENCFF435RQQ	N/A
ChIP-seq	tim-reddy:H3K4me1.t6	ENCSR868MLT	GSE91346	tim-reddy:H3K4me1.t6_rep2_chip_seq_bam	ENCFF081JEI	N/A
ChIP-seq	tim-reddy:H3K4me1.t6	ENCSR868MLT	GSE91346	tim-reddy:H3K4me1.t6_rep2_chip_seq_bigWig	ENCFF358GJB	N/A
ChIP-seq	tim-reddy:H3K4me1.t6	ENCSR868MLT	GSE91346	tim-reddy:H3K4me1.t6_rep2_chip_seq_fastq	ENCFF326GZI	SRR5093157
ChIP-seq	tim-reddy:H3K4me1.t6	ENCSR868MLT	GSE91346	tim-reddy:H3K4me1.t6_rep2_chip_seq_narrowPeak	ENCFF964LDD	N/A
ChIP-seq	tim-reddy:H3K4me1.t6	ENCSR868MLT	GSE91346	tim-reddy:H3K4me1.t6_rep3_chip_seq_bam	ENCFF331AEC	N/A
ChIP-seq	tim-reddy:H3K4me1.t6	ENCSR868MLT	GSE91346	tim-reddy:H3K4me1.t6_rep3_chip_seq_bigWig	ENCFF021GBZ	N/A
ChIP-seq	tim-reddy:H3K4me1.t6	ENCSR868MLT	GSE91346	tim-reddy:H3K4me1.t6_rep3_chip_seq_fastq	ENCFF097ROF	SRR5093156
ChIP-seq	tim-reddy:H3K4me1.t6	ENCSR868MLT	GSE91346	tim-reddy:H3K4me1.t6_rep3_chip_seq_narrowPeak	ENCFF648SYV	N/A
ChIP-seq	tim-reddy:H3K4me1.t7	ENCSR462JVS	GSE91267	tim-reddy:H3K4me1.t7_rep1_chip_seq_bam	ENCFF467UFU	N/A
ChIP-seq	tim-reddy:H3K4me1.t7	ENCSR462JVS	GSE91267	tim-reddy:H3K4me1.t7_rep1_chip_seq_bigWig	ENCFF997BEG	N/A
ChIP-seq	tim-reddy:H3K4me1.t7	ENCSR462JVS	GSE91267	tim-reddy:H3K4me1.t7_rep1_chip_seq_fastq	ENCFF033TUL	SRR5092919
ChIP-seq	tim-reddy:H3K4me1.t7	ENCSR462JVS	GSE91267	tim-reddy:H3K4me1.t7_rep1_chip_seq_narrowPeak	ENCFF453KXZ	N/A
ChIP-seq	tim-reddy:H3K4me1.t7	ENCSR462JVS	GSE91267	tim-reddy:H3K4me1.t7_rep2_chip_seq_bam	ENCFF921BKE	N/A
ChIP-seq	tim-reddy:H3K4me1.t7	ENCSR462JVS	GSE91267	tim-reddy:H3K4me1.t7_rep2_chip_seq_bigWig	ENCFF399GRX	N/A
ChIP-seq	tim-reddy:H3K4me1.t7	ENCSR462JVS	GSE91267	tim-reddy:H3K4me1.t7_rep2_chip_seq_fastq	ENCFF034CSU	SRR5092918
ChIP-seq	tim-reddy:H3K4me1.t7	ENCSR462JVS	GSE91267	tim-reddy:H3K4me1.t7_rep2_chip_seq_narrowPeak	ENCFF682YOM	N/A
ChIP-seq	tim-reddy:H3K4me1.t7	ENCSR462JVS	GSE91267	tim-reddy:H3K4me1.t7_rep3_chip_seq_bam	ENCFF973VYJ	N/A
ChIP-seq	tim-reddy:H3K4me1.t7	ENCSR462JVS	GSE91267	tim-reddy:H3K4me1.t7_rep3_chip_seq_bigWig	ENCFF752JUM	N/A
ChIP-seq	tim-reddy:H3K4me1.t7	ENCSR462JVS	GSE91267	tim-reddy:H3K4me1.t7_rep3_chip_seq_fastq	ENCFF713YRP	SRR5092917
ChIP-seq	tim-reddy:H3K4me1.t7	ENCSR462JVS	GSE91267	tim-reddy:H3K4me1.t7_rep3_chip_seq_narrowPeak	ENCFF469FSI	N/A
ChIP-seq	tim-reddy:H3K4me1.t8	ENCSR404OLV	GSE91256	tim-reddy:H3K4me1.t8_rep1_chip_seq_bam	ENCFF755YDS	N/A
ChIP-seq	tim-reddy:H3K4me1.t8	ENCSR404OLV	GSE91256	tim-reddy:H3K4me1.t8_rep1_chip_seq_bigWig	ENCFF239DHM	N/A
ChIP-seq	tim-reddy:H3K4me1.t8	ENCSR404OLV	GSE91256	tim-reddy:H3K4me1.t8_rep1_chip_seq_fastq	ENCFF294ENQ	SRR5093453
ChIP-seq	tim-reddy:H3K4me1.t8	ENCSR404OLV	GSE91256	tim-reddy:H3K4me1.t8_rep1_chip_seq_narrowPeak	ENCFF789MYE	N/A
ChIP-seq	tim-reddy:H3K4me1.t8	ENCSR404OLV	GSE91256	tim-reddy:H3K4me1.t8_rep2_chip_seq_bam	ENCFF993YJS	N/A
ChIP-seq	tim-reddy:H3K4me1.t8	ENCSR404OLV	GSE91256	tim-reddy:H3K4me1.t8_rep2_chip_seq_bigWig	ENCFF647VPH	N/A
ChIP-seq	tim-reddy:H3K4me1.t8	ENCSR404OLV	GSE91256	tim-reddy:H3K4me1.t8_rep2_chip_seq_fastq	ENCFF478YXZ	SRR5093454
ChIP-seq	tim-reddy:H3K4me1.t8	ENCSR404OLV	GSE91256	tim-reddy:H3K4me1.t8_rep2_chip_seq_narrowPeak	ENCFF590LMH	N/A
ChIP-seq	tim-reddy:H3K4me1.t8	ENCSR404OLV	GSE91256	tim-reddy:H3K4me1.t8_rep3_chip_seq_bam	ENCFF529FRK	N/A
ChIP-seq	tim-reddy:H3K4me1.t8	ENCSR404OLV	GSE91256	tim-reddy:H3K4me1.t8_rep3_chip_seq_bigWig	ENCFF828CMT	N/A
ChIP-seq	tim-reddy:H3K4me1.t8	ENCSR404OLV	GSE91256	tim-reddy:H3K4me1.t8_rep3_chip_seq_fastq	ENCFF316SYE	SRR5093455
ChIP-seq	tim-reddy:H3K4me1.t8	ENCSR404OLV	GSE91256	tim-reddy:H3K4me1.t8_rep3_chip_seq_narrowPeak	ENCFF740RYD	N/A
ChIP-seq	tim-reddy:H3K4me2.t00	ENCSR410BCN	GSE91258	tim-reddy:H3K4me2.t00_rep1_chip_seq_bam	ENCFF648PQD	N/A
ChIP-seq	tim-reddy:H3K4me2.t00	ENCSR410BCN	GSE91258	tim-reddy:H3K4me2.t00_rep1_chip_seq_bigWig	ENCFF067VOU	N/A
ChIP-seq	tim-reddy:H3K4me2.t00	ENCSR410BCN	GSE91258	tim-reddy:H3K4me2.t00_rep1_chip_seq_fastq	ENCFF200MJB	SRR5093463
ChIP-seq	tim-reddy:H3K4me2.t00	ENCSR410BCN	GSE91258	tim-reddy:H3K4me2.t00_rep1_chip_seq_narrowPeak	ENCFF584GUD	N/A
ChIP-seq	tim-reddy:H3K4me2.t00	ENCSR410BCN	GSE91258	tim-reddy:H3K4me2.t00_rep2_chip_seq_bam	ENCFF218IOT	N/A
ChIP-seq	tim-reddy:H3K4me2.t00	ENCSR410BCN	GSE91258	tim-reddy:H3K4me2.t00_rep2_chip_seq_bigWig	ENCFF035NQU	N/A
ChIP-seq	tim-reddy:H3K4me2.t00	ENCSR410BCN	GSE91258	tim-reddy:H3K4me2.t00_rep2_chip_seq_fastq	ENCFF144IZV	SRR5093461
ChIP-seq	tim-reddy:H3K4me2.t00	ENCSR410BCN	GSE91258	tim-reddy:H3K4me2.t00_rep2_chip_seq_narrowPeak	ENCFF095KFJ	N/A
ChIP-seq	tim-reddy:H3K4me2.t00	ENCSR410BCN	GSE91258	tim-reddy:H3K4me2.t00_rep3_chip_seq_bam	ENCFF446ADY	N/A
ChIP-seq	tim-reddy:H3K4me2.t00	ENCSR410BCN	GSE91258	tim-reddy:H3K4me2.t00_rep3_chip_seq_bigWig	ENCFF790CCQ	N/A
ChIP-seq	tim-reddy:H3K4me2.t00	ENCSR410BCN	GSE91258	tim-reddy:H3K4me2.t00_rep3_chip_seq_fastq	ENCFF758ZYB	SRR5093462
ChIP-seq	tim-reddy:H3K4me2.t00	ENCSR410BCN	GSE91258	tim-reddy:H3K4me2.t00_rep3_chip_seq_narrowPeak	ENCFF813VDT	N/A
ChIP-seq	tim-reddy:H3K4me2.t05	ENCSR215DID	GSE91219	tim-reddy:H3K4me2.t05_rep1_chip_seq_bam	ENCFF062BFW	N/A
ChIP-seq	tim-reddy:H3K4me2.t05	ENCSR215DID	GSE91219	tim-reddy:H3K4me2.t05_rep1_chip_seq_bigWig	ENCFF171DWH	N/A
ChIP-seq	tim-reddy:H3K4me2.t05	ENCSR215DID	GSE91219	tim-reddy:H3K4me2.t05_rep1_chip_seq_fastq	ENCFF879UBF	SRR5093349
ChIP-seq	tim-reddy:H3K4me2.t05	ENCSR215DID	GSE91219	tim-reddy:H3K4me2.t05_rep1_chip_seq_narrowPeak	ENCFF075IEK	N/A
ChIP-seq	tim-reddy:H3K4me2.t05	ENCSR215DID	GSE91219	tim-reddy:H3K4me2.t05_rep2_chip_seq_bam	ENCFF671YEY	N/A
ChIP-seq	tim-reddy:H3K4me2.t05	ENCSR215DID	GSE91219	tim-reddy:H3K4me2.t05_rep2_chip_seq_bigWig	ENCFF233VAM	N/A
ChIP-seq	tim-reddy:H3K4me2.t05	ENCSR215DID	GSE91219	tim-reddy:H3K4me2.t05_rep2_chip_seq_fastq	ENCFF447VSN	SRR5093347
ChIP-seq	tim-reddy:H3K4me2.t05	ENCSR215DID	GSE91219	tim-reddy:H3K4me2.t05_rep2_chip_seq_narrowPeak	ENCFF309NHO	N/A
ChIP-seq	tim-reddy:H3K4me2.t05	ENCSR215DID	GSE91219	tim-reddy:H3K4me2.t05_rep3_chip_seq_bam	ENCFF728JJB	N/A
ChIP-seq	tim-reddy:H3K4me2.t05	ENCSR215DID	GSE91219	tim-reddy:H3K4me2.t05_rep3_chip_seq_bigWig	ENCFF790IJV	N/A
ChIP-seq	tim-reddy:H3K4me2.t05	ENCSR215DID	GSE91219	tim-reddy:H3K4me2.t05_rep3_chip_seq_fastq	ENCFF425ECA	SRR5093348
ChIP-seq	tim-reddy:H3K4me2.t05	ENCSR215DID	GSE91219	tim-reddy:H3K4me2.t05_rep3_chip_seq_narrowPeak	ENCFF083UKH	N/A
ChIP-seq	tim-reddy:H3K4me2.t10	ENCSR766NHB	GSE91331	tim-reddy:H3K4me2.t10_rep1_chip_seq_bam	ENCFF535YXN	N/A
ChIP-seq	tim-reddy:H3K4me2.t10	ENCSR766NHB	GSE91331	tim-reddy:H3K4me2.t10_rep1_chip_seq_bigWig	ENCFF424HPN	N/A
ChIP-seq	tim-reddy:H3K4me2.t10	ENCSR766NHB	GSE91331	tim-reddy:H3K4me2.t10_rep1_chip_seq_fastq	ENCFF745GYL	SRR5093113
ChIP-seq	tim-reddy:H3K4me2.t10	ENCSR766NHB	GSE91331	tim-reddy:H3K4me2.t10_rep1_chip_seq_narrowPeak	ENCFF927ZTA	N/A
ChIP-seq	tim-reddy:H3K4me2.t10	ENCSR766NHB	GSE91331	tim-reddy:H3K4me2.t10_rep2_chip_seq_bam	ENCFF568YVL	N/A
ChIP-seq	tim-reddy:H3K4me2.t10	ENCSR766NHB	GSE91331	tim-reddy:H3K4me2.t10_rep2_chip_seq_bigWig	ENCFF431GMU	N/A
ChIP-seq	tim-reddy:H3K4me2.t10	ENCSR766NHB	GSE91331	tim-reddy:H3K4me2.t10_rep2_chip_seq_fastq	ENCFF166LOB	SRR5093112
ChIP-seq	tim-reddy:H3K4me2.t10	ENCSR766NHB	GSE91331	tim-reddy:H3K4me2.t10_rep2_chip_seq_narrowPeak	ENCFF139XOI	N/A
ChIP-seq	tim-reddy:H3K4me2.t10	ENCSR766NHB	GSE91331	tim-reddy:H3K4me2.t10_rep3_chip_seq_bam	ENCFF020PCY	N/A
ChIP-seq	tim-reddy:H3K4me2.t10	ENCSR766NHB	GSE91331	tim-reddy:H3K4me2.t10_rep3_chip_seq_bigWig	ENCFF659CKW	N/A
ChIP-seq	tim-reddy:H3K4me2.t10	ENCSR766NHB	GSE91331	tim-reddy:H3K4me2.t10_rep3_chip_seq_fastq	ENCFF265AZA	SRR5093111
ChIP-seq	tim-reddy:H3K4me2.t10	ENCSR766NHB	GSE91331	tim-reddy:H3K4me2.t10_rep3_chip_seq_narrowPeak	ENCFF490DXH	N/A
ChIP-seq	tim-reddy:H3K4me2.t12	ENCSR428DFL	GSE91262	tim-reddy:H3K4me2.t12_rep1_chip_seq_bam	ENCFF709UDQ	N/A
ChIP-seq	tim-reddy:H3K4me2.t12	ENCSR428DFL	GSE91262	tim-reddy:H3K4me2.t12_rep1_chip_seq_bigWig	ENCFF702RDE	N/A
ChIP-seq	tim-reddy:H3K4me2.t12	ENCSR428DFL	GSE91262	tim-reddy:H3K4me2.t12_rep1_chip_seq_fastq	ENCFF507YIE	SRR5093473
ChIP-seq	tim-reddy:H3K4me2.t12	ENCSR428DFL	GSE91262	tim-reddy:H3K4me2.t12_rep1_chip_seq_narrowPeak	ENCFF993BBC	N/A
ChIP-seq	tim-reddy:H3K4me2.t12	ENCSR428DFL	GSE91262	tim-reddy:H3K4me2.t12_rep2_chip_seq_bam	ENCFF676QQL	N/A
ChIP-seq	tim-reddy:H3K4me2.t12	ENCSR428DFL	GSE91262	tim-reddy:H3K4me2.t12_rep2_chip_seq_bigWig	ENCFF317PDJ	N/A
ChIP-seq	tim-reddy:H3K4me2.t12	ENCSR428DFL	GSE91262	tim-reddy:H3K4me2.t12_rep2_chip_seq_fastq	ENCFF826KAA	SRR5093472
ChIP-seq	tim-reddy:H3K4me2.t12	ENCSR428DFL	GSE91262	tim-reddy:H3K4me2.t12_rep2_chip_seq_narrowPeak	ENCFF682AXX	N/A
ChIP-seq	tim-reddy:H3K4me2.t12	ENCSR428DFL	GSE91262	tim-reddy:H3K4me2.t12_rep3_chip_seq_bam	ENCFF909NTA	N/A
ChIP-seq	tim-reddy:H3K4me2.t12	ENCSR428DFL	GSE91262	tim-reddy:H3K4me2.t12_rep3_chip_seq_bigWig	ENCFF117QRL	N/A
ChIP-seq	tim-reddy:H3K4me2.t12	ENCSR428DFL	GSE91262	tim-reddy:H3K4me2.t12_rep3_chip_seq_fastq	ENCFF819OUG	SRR5093474
ChIP-seq	tim-reddy:H3K4me2.t12	ENCSR428DFL	GSE91262	tim-reddy:H3K4me2.t12_rep3_chip_seq_narrowPeak	ENCFF921KCM	N/A
ChIP-seq	tim-reddy:H3K4me2.t1	ENCSR692JHM	GSE91323	tim-reddy:H3K4me2.t1_rep1_chip_seq_bam	ENCFF587MWZ	N/A
ChIP-seq	tim-reddy:H3K4me2.t1	ENCSR692JHM	GSE91323	tim-reddy:H3K4me2.t1_rep1_chip_seq_bigWig	ENCFF807YFY	N/A
ChIP-seq	tim-reddy:H3K4me2.t1	ENCSR692JHM	GSE91323	tim-reddy:H3K4me2.t1_rep1_chip_seq_fastq	ENCFF908BKF	SRR5093089
ChIP-seq	tim-reddy:H3K4me2.t1	ENCSR692JHM	GSE91323	tim-reddy:H3K4me2.t1_rep1_chip_seq_narrowPeak	ENCFF656TZT	N/A
ChIP-seq	tim-reddy:H3K4me2.t1	ENCSR692JHM	GSE91323	tim-reddy:H3K4me2.t1_rep2_chip_seq_bam	ENCFF086ERM	N/A
ChIP-seq	tim-reddy:H3K4me2.t1	ENCSR692JHM	GSE91323	tim-reddy:H3K4me2.t1_rep2_chip_seq_bigWig	ENCFF194SPQ	N/A
ChIP-seq	tim-reddy:H3K4me2.t1	ENCSR692JHM	GSE91323	tim-reddy:H3K4me2.t1_rep2_chip_seq_fastq	ENCFF059MEE	SRR5093090
ChIP-seq	tim-reddy:H3K4me2.t1	ENCSR692JHM	GSE91323	tim-reddy:H3K4me2.t1_rep2_chip_seq_narrowPeak	ENCFF175RXX	N/A
ChIP-seq	tim-reddy:H3K4me2.t1	ENCSR692JHM	GSE91323	tim-reddy:H3K4me2.t1_rep3_chip_seq_bam	ENCFF609HSK	N/A
ChIP-seq	tim-reddy:H3K4me2.t1	ENCSR692JHM	GSE91323	tim-reddy:H3K4me2.t1_rep3_chip_seq_bigWig	ENCFF172PSP	N/A
ChIP-seq	tim-reddy:H3K4me2.t1	ENCSR692JHM	GSE91323	tim-reddy:H3K4me2.t1_rep3_chip_seq_fastq	ENCFF153NEC	SRR5093088
ChIP-seq	tim-reddy:H3K4me2.t1	ENCSR692JHM	GSE91323	tim-reddy:H3K4me2.t1_rep3_chip_seq_narrowPeak	ENCFF802WNK	N/A
ChIP-seq	tim-reddy:H3K4me2.t2	ENCSR124YCC	GSE91206	tim-reddy:H3K4me2.t2_rep1_chip_seq_bam	ENCFF591UPW	N/A
ChIP-seq	tim-reddy:H3K4me2.t2	ENCSR124YCC	GSE91206	tim-reddy:H3K4me2.t2_rep1_chip_seq_bigWig	ENCFF537RRM	N/A
ChIP-seq	tim-reddy:H3K4me2.t2	ENCSR124YCC	GSE91206	tim-reddy:H3K4me2.t2_rep1_chip_seq_fastq	ENCFF287LNQ	SRR5093303
ChIP-seq	tim-reddy:H3K4me2.t2	ENCSR124YCC	GSE91206	tim-reddy:H3K4me2.t2_rep1_chip_seq_narrowPeak	ENCFF082UQX	N/A
ChIP-seq	tim-reddy:H3K4me2.t2	ENCSR124YCC	GSE91206	tim-reddy:H3K4me2.t2_rep2_chip_seq_bam	ENCFF251SFA	N/A
ChIP-seq	tim-reddy:H3K4me2.t2	ENCSR124YCC	GSE91206	tim-reddy:H3K4me2.t2_rep2_chip_seq_bigWig	ENCFF583JXT	N/A
ChIP-seq	tim-reddy:H3K4me2.t2	ENCSR124YCC	GSE91206	tim-reddy:H3K4me2.t2_rep2_chip_seq_fastq	ENCFF370HPK	SRR5093302
ChIP-seq	tim-reddy:H3K4me2.t2	ENCSR124YCC	GSE91206	tim-reddy:H3K4me2.t2_rep2_chip_seq_narrowPeak	ENCFF670IUP	N/A
ChIP-seq	tim-reddy:H3K4me2.t2	ENCSR124YCC	GSE91206	tim-reddy:H3K4me2.t2_rep3_chip_seq_bam	ENCFF337LNP	N/A
ChIP-seq	tim-reddy:H3K4me2.t2	ENCSR124YCC	GSE91206	tim-reddy:H3K4me2.t2_rep3_chip_seq_bigWig	ENCFF859BVW	N/A
ChIP-seq	tim-reddy:H3K4me2.t2	ENCSR124YCC	GSE91206	tim-reddy:H3K4me2.t2_rep3_chip_seq_fastq	ENCFF547QCV	SRR5093304
ChIP-seq	tim-reddy:H3K4me2.t2	ENCSR124YCC	GSE91206	tim-reddy:H3K4me2.t2_rep3_chip_seq_narrowPeak	ENCFF106TOJ	N/A
ChIP-seq	tim-reddy:H3K4me2.t3	ENCSR918VQU	GSE91356	tim-reddy:H3K4me2.t3_rep1_chip_seq_bam	ENCFF823RCY	N/A
ChIP-seq	tim-reddy:H3K4me2.t3	ENCSR918VQU	GSE91356	tim-reddy:H3K4me2.t3_rep1_chip_seq_bigWig	ENCFF812GUV	N/A
ChIP-seq	tim-reddy:H3K4me2.t3	ENCSR918VQU	GSE91356	tim-reddy:H3K4me2.t3_rep1_chip_seq_fastq	ENCFF426BMJ	SRR5093185
ChIP-seq	tim-reddy:H3K4me2.t3	ENCSR918VQU	GSE91356	tim-reddy:H3K4me2.t3_rep1_chip_seq_narrowPeak	ENCFF356VYZ	N/A
ChIP-seq	tim-reddy:H3K4me2.t3	ENCSR918VQU	GSE91356	tim-reddy:H3K4me2.t3_rep3_chip_seq_bam	ENCFF804WLT	N/A
ChIP-seq	tim-reddy:H3K4me2.t3	ENCSR918VQU	GSE91356	tim-reddy:H3K4me2.t3_rep3_chip_seq_bigWig	ENCFF766PQZ	N/A
ChIP-seq	tim-reddy:H3K4me2.t3	ENCSR918VQU	GSE91356	tim-reddy:H3K4me2.t3_rep3_chip_seq_fastq	ENCFF693TSM	SRR5093184
ChIP-seq	tim-reddy:H3K4me2.t3	ENCSR918VQU	GSE91356	tim-reddy:H3K4me2.t3_rep3_chip_seq_narrowPeak	ENCFF188FQA	N/A
ChIP-seq	tim-reddy:H3K4me2.t4	ENCSR834LCU	GSE91341	tim-reddy:H3K4me2.t4_rep1_chip_seq_bam	ENCFF941DXM	N/A
ChIP-seq	tim-reddy:H3K4me2.t4	ENCSR834LCU	GSE91341	tim-reddy:H3K4me2.t4_rep1_chip_seq_bigWig	ENCFF615DOO	N/A
ChIP-seq	tim-reddy:H3K4me2.t4	ENCSR834LCU	GSE91341	tim-reddy:H3K4me2.t4_rep1_chip_seq_fastq	ENCFF671XBU	SRR5093138
ChIP-seq	tim-reddy:H3K4me2.t4	ENCSR834LCU	GSE91341	tim-reddy:H3K4me2.t4_rep1_chip_seq_narrowPeak	ENCFF284ZQG	N/A
ChIP-seq	tim-reddy:H3K4me2.t4	ENCSR834LCU	GSE91341	tim-reddy:H3K4me2.t4_rep2_chip_seq_bam	ENCFF982JAL	N/A
ChIP-seq	tim-reddy:H3K4me2.t4	ENCSR834LCU	GSE91341	tim-reddy:H3K4me2.t4_rep2_chip_seq_bigWig	ENCFF024DHC	N/A
ChIP-seq	tim-reddy:H3K4me2.t4	ENCSR834LCU	GSE91341	tim-reddy:H3K4me2.t4_rep2_chip_seq_fastq	ENCFF696CIT	SRR5093137
ChIP-seq	tim-reddy:H3K4me2.t4	ENCSR834LCU	GSE91341	tim-reddy:H3K4me2.t4_rep2_chip_seq_narrowPeak	ENCFF027NSF	N/A
ChIP-seq	tim-reddy:H3K4me2.t5	ENCSR555EAA	GSE91288	tim-reddy:H3K4me2.t5_rep1_chip_seq_bam	ENCFF382KSW	N/A
ChIP-seq	tim-reddy:H3K4me2.t5	ENCSR555EAA	GSE91288	tim-reddy:H3K4me2.t5_rep1_chip_seq_bigWig	ENCFF327VXK	N/A
ChIP-seq	tim-reddy:H3K4me2.t5	ENCSR555EAA	GSE91288	tim-reddy:H3K4me2.t5_rep1_chip_seq_fastq	ENCFF877SXD	SRR5092978
ChIP-seq	tim-reddy:H3K4me2.t5	ENCSR555EAA	GSE91288	tim-reddy:H3K4me2.t5_rep1_chip_seq_narrowPeak	ENCFF465YGD	N/A
ChIP-seq	tim-reddy:H3K4me2.t5	ENCSR555EAA	GSE91288	tim-reddy:H3K4me2.t5_rep2_chip_seq_bam	ENCFF488AWO	N/A
ChIP-seq	tim-reddy:H3K4me2.t5	ENCSR555EAA	GSE91288	tim-reddy:H3K4me2.t5_rep2_chip_seq_bigWig	ENCFF431YGV	N/A
ChIP-seq	tim-reddy:H3K4me2.t5	ENCSR555EAA	GSE91288	tim-reddy:H3K4me2.t5_rep2_chip_seq_fastq	ENCFF259UMZ	SRR5092977
ChIP-seq	tim-reddy:H3K4me2.t5	ENCSR555EAA	GSE91288	tim-reddy:H3K4me2.t5_rep2_chip_seq_narrowPeak	ENCFF128NXU	N/A
ChIP-seq	tim-reddy:H3K4me2.t5	ENCSR555EAA	GSE91288	tim-reddy:H3K4me2.t5_rep3_chip_seq_bam	ENCFF900PPH	N/A
ChIP-seq	tim-reddy:H3K4me2.t5	ENCSR555EAA	GSE91288	tim-reddy:H3K4me2.t5_rep3_chip_seq_bigWig	ENCFF701KTL	N/A
ChIP-seq	tim-reddy:H3K4me2.t5	ENCSR555EAA	GSE91288	tim-reddy:H3K4me2.t5_rep3_chip_seq_fastq	ENCFF297IZU	SRR5092976
ChIP-seq	tim-reddy:H3K4me2.t5	ENCSR555EAA	GSE91288	tim-reddy:H3K4me2.t5_rep3_chip_seq_narrowPeak	ENCFF025EOH	N/A
ChIP-seq	tim-reddy:H3K4me2.t6	ENCSR905REY	GSE91353	tim-reddy:H3K4me2.t6_rep1_chip_seq_bam	ENCFF634AAH	N/A
ChIP-seq	tim-reddy:H3K4me2.t6	ENCSR905REY	GSE91353	tim-reddy:H3K4me2.t6_rep1_chip_seq_bigWig	ENCFF653NNI	N/A
ChIP-seq	tim-reddy:H3K4me2.t6	ENCSR905REY	GSE91353	tim-reddy:H3K4me2.t6_rep1_chip_seq_fastq	ENCFF402OWG	SRR5093176
ChIP-seq	tim-reddy:H3K4me2.t6	ENCSR905REY	GSE91353	tim-reddy:H3K4me2.t6_rep1_chip_seq_narrowPeak	ENCFF714REY	N/A
ChIP-seq	tim-reddy:H3K4me2.t6	ENCSR905REY	GSE91353	tim-reddy:H3K4me2.t6_rep2_chip_seq_bam	ENCFF834LKW	N/A
ChIP-seq	tim-reddy:H3K4me2.t6	ENCSR905REY	GSE91353	tim-reddy:H3K4me2.t6_rep2_chip_seq_bigWig	ENCFF502EYO	N/A
ChIP-seq	tim-reddy:H3K4me2.t6	ENCSR905REY	GSE91353	tim-reddy:H3K4me2.t6_rep2_chip_seq_fastq	ENCFF559TLS	SRR5093177
ChIP-seq	tim-reddy:H3K4me2.t6	ENCSR905REY	GSE91353	tim-reddy:H3K4me2.t6_rep2_chip_seq_narrowPeak	ENCFF339VWA	N/A
ChIP-seq	tim-reddy:H3K4me2.t6	ENCSR905REY	GSE91353	tim-reddy:H3K4me2.t6_rep3_chip_seq_bam	ENCFF028XBN	N/A
ChIP-seq	tim-reddy:H3K4me2.t6	ENCSR905REY	GSE91353	tim-reddy:H3K4me2.t6_rep3_chip_seq_bigWig	ENCFF639KTY	N/A
ChIP-seq	tim-reddy:H3K4me2.t6	ENCSR905REY	GSE91353	tim-reddy:H3K4me2.t6_rep3_chip_seq_fastq	ENCFF642UPF	SRR5093175
ChIP-seq	tim-reddy:H3K4me2.t6	ENCSR905REY	GSE91353	tim-reddy:H3K4me2.t6_rep3_chip_seq_narrowPeak	ENCFF364WKU	N/A
ChIP-seq	tim-reddy:H3K4me2.t7	ENCSR016PSC	GSE91193	tim-reddy:H3K4me2.t7_rep1_chip_seq_bam	ENCFF744KJQ	N/A
ChIP-seq	tim-reddy:H3K4me2.t7	ENCSR016PSC	GSE91193	tim-reddy:H3K4me2.t7_rep1_chip_seq_bigWig	ENCFF293XVD	N/A
ChIP-seq	tim-reddy:H3K4me2.t7	ENCSR016PSC	GSE91193	tim-reddy:H3K4me2.t7_rep1_chip_seq_fastq	ENCFF567QVH	SRR5093246
ChIP-seq	tim-reddy:H3K4me2.t7	ENCSR016PSC	GSE91193	tim-reddy:H3K4me2.t7_rep1_chip_seq_narrowPeak	ENCFF399MTZ	N/A
ChIP-seq	tim-reddy:H3K4me2.t7	ENCSR016PSC	GSE91193	tim-reddy:H3K4me2.t7_rep2_chip_seq_bam	ENCFF981YVW	N/A
ChIP-seq	tim-reddy:H3K4me2.t7	ENCSR016PSC	GSE91193	tim-reddy:H3K4me2.t7_rep2_chip_seq_bigWig	ENCFF525NCG	N/A
ChIP-seq	tim-reddy:H3K4me2.t7	ENCSR016PSC	GSE91193	tim-reddy:H3K4me2.t7_rep2_chip_seq_fastq	ENCFF127GQH	SRR5093247
ChIP-seq	tim-reddy:H3K4me2.t7	ENCSR016PSC	GSE91193	tim-reddy:H3K4me2.t7_rep2_chip_seq_narrowPeak	ENCFF644QWT	N/A
ChIP-seq	tim-reddy:H3K4me2.t7	ENCSR016PSC	GSE91193	tim-reddy:H3K4me2.t7_rep3_chip_seq_bam	ENCFF018SQY	N/A
ChIP-seq	tim-reddy:H3K4me2.t7	ENCSR016PSC	GSE91193	tim-reddy:H3K4me2.t7_rep3_chip_seq_bigWig	ENCFF642YTW	N/A
ChIP-seq	tim-reddy:H3K4me2.t7	ENCSR016PSC	GSE91193	tim-reddy:H3K4me2.t7_rep3_chip_seq_fastq	ENCFF324LWV	SRR5093245
ChIP-seq	tim-reddy:H3K4me2.t7	ENCSR016PSC	GSE91193	tim-reddy:H3K4me2.t7_rep3_chip_seq_narrowPeak	ENCFF059DVQ	N/A
ChIP-seq	tim-reddy:H3K4me2.t8	ENCSR774KCU	GSE91334	tim-reddy:H3K4me2.t8_rep1_chip_seq_bam	ENCFF824HQX	N/A
ChIP-seq	tim-reddy:H3K4me2.t8	ENCSR774KCU	GSE91334	tim-reddy:H3K4me2.t8_rep1_chip_seq_bigWig	ENCFF881PHF	N/A
ChIP-seq	tim-reddy:H3K4me2.t8	ENCSR774KCU	GSE91334	tim-reddy:H3K4me2.t8_rep1_chip_seq_fastq	ENCFF584XSR	SRR5093122
ChIP-seq	tim-reddy:H3K4me2.t8	ENCSR774KCU	GSE91334	tim-reddy:H3K4me2.t8_rep1_chip_seq_narrowPeak	ENCFF287UOI	N/A
ChIP-seq	tim-reddy:H3K4me2.t8	ENCSR774KCU	GSE91334	tim-reddy:H3K4me2.t8_rep2_chip_seq_bam	ENCFF998LMA	N/A
ChIP-seq	tim-reddy:H3K4me2.t8	ENCSR774KCU	GSE91334	tim-reddy:H3K4me2.t8_rep2_chip_seq_bigWig	ENCFF103REQ	N/A
ChIP-seq	tim-reddy:H3K4me2.t8	ENCSR774KCU	GSE91334	tim-reddy:H3K4me2.t8_rep2_chip_seq_fastq	ENCFF549USR	SRR5093121
ChIP-seq	tim-reddy:H3K4me2.t8	ENCSR774KCU	GSE91334	tim-reddy:H3K4me2.t8_rep2_chip_seq_narrowPeak	ENCFF234BKG	N/A
ChIP-seq	tim-reddy:H3K4me2.t8	ENCSR774KCU	GSE91334	tim-reddy:H3K4me2.t8_rep3_chip_seq_bam	ENCFF242RGF	N/A
ChIP-seq	tim-reddy:H3K4me2.t8	ENCSR774KCU	GSE91334	tim-reddy:H3K4me2.t8_rep3_chip_seq_bigWig	ENCFF406FKM	N/A
ChIP-seq	tim-reddy:H3K4me2.t8	ENCSR774KCU	GSE91334	tim-reddy:H3K4me2.t8_rep3_chip_seq_fastq	ENCFF303IEC	SRR5093120
ChIP-seq	tim-reddy:H3K4me2.t8	ENCSR774KCU	GSE91334	tim-reddy:H3K4me2.t8_rep3_chip_seq_narrowPeak	ENCFF664YQG	N/A
ChIP-seq	tim-reddy:H3K4me3.t00	ENCSR203XPU	GSE91218	tim-reddy:H3K4me3.t00_rep1_chip_seq_bam	ENCFF973TUQ	N/A
ChIP-seq	tim-reddy:H3K4me3.t00	ENCSR203XPU	GSE91218	tim-reddy:H3K4me3.t00_rep1_chip_seq_bigWig	ENCFF997ANB	N/A
ChIP-seq	tim-reddy:H3K4me3.t00	ENCSR203XPU	GSE91218	tim-reddy:H3K4me3.t00_rep1_chip_seq_fastq	ENCFF552FLH	SRR5093337
ChIP-seq	tim-reddy:H3K4me3.t00	ENCSR203XPU	GSE91218	tim-reddy:H3K4me3.t00_rep1_chip_seq_narrowPeak	ENCFF404REU	N/A
ChIP-seq	tim-reddy:H3K4me3.t00	ENCSR203XPU	GSE91218	tim-reddy:H3K4me3.t00_rep2_chip_seq_bam	ENCFF643FMK	N/A
ChIP-seq	tim-reddy:H3K4me3.t00	ENCSR203XPU	GSE91218	tim-reddy:H3K4me3.t00_rep2_chip_seq_bigWig	ENCFF374BHV	N/A
ChIP-seq	tim-reddy:H3K4me3.t00	ENCSR203XPU	GSE91218	tim-reddy:H3K4me3.t00_rep2_chip_seq_fastq	ENCFF681VDV	SRR5093336
ChIP-seq	tim-reddy:H3K4me3.t00	ENCSR203XPU	GSE91218	tim-reddy:H3K4me3.t00_rep2_chip_seq_narrowPeak	ENCFF956FPT	N/A
ChIP-seq	tim-reddy:H3K4me3.t00	ENCSR203XPU	GSE91218	tim-reddy:H3K4me3.t00_rep3_chip_seq_bam	ENCFF428UWO	N/A
ChIP-seq	tim-reddy:H3K4me3.t00	ENCSR203XPU	GSE91218	tim-reddy:H3K4me3.t00_rep3_chip_seq_bigWig	ENCFF987FCK	N/A
ChIP-seq	tim-reddy:H3K4me3.t00	ENCSR203XPU	GSE91218	tim-reddy:H3K4me3.t00_rep3_chip_seq_fastq	ENCFF494CRS	SRR5093335
ChIP-seq	tim-reddy:H3K4me3.t00	ENCSR203XPU	GSE91218	tim-reddy:H3K4me3.t00_rep3_chip_seq_narrowPeak	ENCFF857ZRY	N/A
ChIP-seq	tim-reddy:H3K4me3.t05	ENCSR677QYM	GSE91315	tim-reddy:H3K4me3.t05_rep1_chip_seq_bam	ENCFF745QZF	N/A
ChIP-seq	tim-reddy:H3K4me3.t05	ENCSR677QYM	GSE91315	tim-reddy:H3K4me3.t05_rep1_chip_seq_bigWig	ENCFF431KID	N/A
ChIP-seq	tim-reddy:H3K4me3.t05	ENCSR677QYM	GSE91315	tim-reddy:H3K4me3.t05_rep1_chip_seq_fastq	ENCFF857QBC	SRR5093068
ChIP-seq	tim-reddy:H3K4me3.t05	ENCSR677QYM	GSE91315	tim-reddy:H3K4me3.t05_rep1_chip_seq_narrowPeak	ENCFF824JWA	N/A
ChIP-seq	tim-reddy:H3K4me3.t05	ENCSR677QYM	GSE91315	tim-reddy:H3K4me3.t05_rep2_chip_seq_bam	ENCFF021LON	N/A
ChIP-seq	tim-reddy:H3K4me3.t05	ENCSR677QYM	GSE91315	tim-reddy:H3K4me3.t05_rep2_chip_seq_bigWig	ENCFF224DEW	N/A
ChIP-seq	tim-reddy:H3K4me3.t05	ENCSR677QYM	GSE91315	tim-reddy:H3K4me3.t05_rep2_chip_seq_fastq	ENCFF881BCI	SRR5093067
ChIP-seq	tim-reddy:H3K4me3.t05	ENCSR677QYM	GSE91315	tim-reddy:H3K4me3.t05_rep2_chip_seq_narrowPeak	ENCFF633ETG	N/A
ChIP-seq	tim-reddy:H3K4me3.t05	ENCSR677QYM	GSE91315	tim-reddy:H3K4me3.t05_rep3_chip_seq_bam	ENCFF922BBZ	N/A
ChIP-seq	tim-reddy:H3K4me3.t05	ENCSR677QYM	GSE91315	tim-reddy:H3K4me3.t05_rep3_chip_seq_bigWig	ENCFF528WVJ	N/A
ChIP-seq	tim-reddy:H3K4me3.t05	ENCSR677QYM	GSE91315	tim-reddy:H3K4me3.t05_rep3_chip_seq_fastq	ENCFF739HOV	SRR5093066
ChIP-seq	tim-reddy:H3K4me3.t05	ENCSR677QYM	GSE91315	tim-reddy:H3K4me3.t05_rep3_chip_seq_narrowPeak	ENCFF129RVY	N/A
ChIP-seq	tim-reddy:H3K4me3.t10	ENCSR139DGM	GSE91209	tim-reddy:H3K4me3.t10_rep1_chip_seq_bam	ENCFF777ITD	N/A
ChIP-seq	tim-reddy:H3K4me3.t10	ENCSR139DGM	GSE91209	tim-reddy:H3K4me3.t10_rep1_chip_seq_bigWig	ENCFF660OND	N/A
ChIP-seq	tim-reddy:H3K4me3.t10	ENCSR139DGM	GSE91209	tim-reddy:H3K4me3.t10_rep1_chip_seq_fastq	ENCFF529XBL	SRR5093300
ChIP-seq	tim-reddy:H3K4me3.t10	ENCSR139DGM	GSE91209	tim-reddy:H3K4me3.t10_rep1_chip_seq_narrowPeak	ENCFF323SAI	N/A
ChIP-seq	tim-reddy:H3K4me3.t10	ENCSR139DGM	GSE91209	tim-reddy:H3K4me3.t10_rep2_chip_seq_bam	ENCFF776MDW	N/A
ChIP-seq	tim-reddy:H3K4me3.t10	ENCSR139DGM	GSE91209	tim-reddy:H3K4me3.t10_rep2_chip_seq_bigWig	ENCFF805SSL	N/A
ChIP-seq	tim-reddy:H3K4me3.t10	ENCSR139DGM	GSE91209	tim-reddy:H3K4me3.t10_rep2_chip_seq_fastq	ENCFF110IIB	SRR5093301
ChIP-seq	tim-reddy:H3K4me3.t10	ENCSR139DGM	GSE91209	tim-reddy:H3K4me3.t10_rep2_chip_seq_narrowPeak	ENCFF495OGW	N/A
ChIP-seq	tim-reddy:H3K4me3.t10	ENCSR139DGM	GSE91209	tim-reddy:H3K4me3.t10_rep3_chip_seq_bam	ENCFF567GGI	N/A
ChIP-seq	tim-reddy:H3K4me3.t10	ENCSR139DGM	GSE91209	tim-reddy:H3K4me3.t10_rep3_chip_seq_bigWig	ENCFF878HCK	N/A
ChIP-seq	tim-reddy:H3K4me3.t10	ENCSR139DGM	GSE91209	tim-reddy:H3K4me3.t10_rep3_chip_seq_fastq	ENCFF506QAD	SRR5093299
ChIP-seq	tim-reddy:H3K4me3.t10	ENCSR139DGM	GSE91209	tim-reddy:H3K4me3.t10_rep3_chip_seq_narrowPeak	ENCFF379EVO	N/A
ChIP-seq	tim-reddy:H3K4me3.t12	ENCSR944WVU	GSE91361	tim-reddy:H3K4me3.t12_rep1_chip_seq_bam	ENCFF375KMZ	N/A
ChIP-seq	tim-reddy:H3K4me3.t12	ENCSR944WVU	GSE91361	tim-reddy:H3K4me3.t12_rep1_chip_seq_bigWig	ENCFF363ZWQ	N/A
ChIP-seq	tim-reddy:H3K4me3.t12	ENCSR944WVU	GSE91361	tim-reddy:H3K4me3.t12_rep1_chip_seq_fastq	ENCFF891GXF	SRR5093200
ChIP-seq	tim-reddy:H3K4me3.t12	ENCSR944WVU	GSE91361	tim-reddy:H3K4me3.t12_rep1_chip_seq_narrowPeak	ENCFF662KPN	N/A
ChIP-seq	tim-reddy:H3K4me3.t12	ENCSR944WVU	GSE91361	tim-reddy:H3K4me3.t12_rep2_chip_seq_bam	ENCFF435QPD	N/A
ChIP-seq	tim-reddy:H3K4me3.t12	ENCSR944WVU	GSE91361	tim-reddy:H3K4me3.t12_rep2_chip_seq_bigWig	ENCFF439HBN	N/A
ChIP-seq	tim-reddy:H3K4me3.t12	ENCSR944WVU	GSE91361	tim-reddy:H3K4me3.t12_rep2_chip_seq_fastq	ENCFF170YTR	SRR5093201
ChIP-seq	tim-reddy:H3K4me3.t12	ENCSR944WVU	GSE91361	tim-reddy:H3K4me3.t12_rep2_chip_seq_narrowPeak	ENCFF428LWO	N/A
ChIP-seq	tim-reddy:H3K4me3.t12	ENCSR944WVU	GSE91361	tim-reddy:H3K4me3.t12_rep3_chip_seq_bam	ENCFF121HBN	N/A
ChIP-seq	tim-reddy:H3K4me3.t12	ENCSR944WVU	GSE91361	tim-reddy:H3K4me3.t12_rep3_chip_seq_bigWig	ENCFF262VTS	N/A
ChIP-seq	tim-reddy:H3K4me3.t12	ENCSR944WVU	GSE91361	tim-reddy:H3K4me3.t12_rep3_chip_seq_fastq	ENCFF020SER	SRR5093199
ChIP-seq	tim-reddy:H3K4me3.t12	ENCSR944WVU	GSE91361	tim-reddy:H3K4me3.t12_rep3_chip_seq_narrowPeak	ENCFF973AWL	N/A
ChIP-seq	tim-reddy:H3K4me3.t1	ENCSR928FDN	GSE91359	tim-reddy:H3K4me3.t1_rep1_chip_seq_bam	ENCFF945WGW	N/A
ChIP-seq	tim-reddy:H3K4me3.t1	ENCSR928FDN	GSE91359	tim-reddy:H3K4me3.t1_rep1_chip_seq_bigWig	ENCFF407IRC	N/A
ChIP-seq	tim-reddy:H3K4me3.t1	ENCSR928FDN	GSE91359	tim-reddy:H3K4me3.t1_rep1_chip_seq_fastq	ENCFF253WRR	SRR5093194
ChIP-seq	tim-reddy:H3K4me3.t1	ENCSR928FDN	GSE91359	tim-reddy:H3K4me3.t1_rep1_chip_seq_narrowPeak	ENCFF332DRV	N/A
ChIP-seq	tim-reddy:H3K4me3.t1	ENCSR928FDN	GSE91359	tim-reddy:H3K4me3.t1_rep2_chip_seq_bam	ENCFF978RET	N/A
ChIP-seq	tim-reddy:H3K4me3.t1	ENCSR928FDN	GSE91359	tim-reddy:H3K4me3.t1_rep2_chip_seq_bigWig	ENCFF896AVK	N/A
ChIP-seq	tim-reddy:H3K4me3.t1	ENCSR928FDN	GSE91359	tim-reddy:H3K4me3.t1_rep2_chip_seq_fastq	ENCFF687JBS	SRR5093193
ChIP-seq	tim-reddy:H3K4me3.t1	ENCSR928FDN	GSE91359	tim-reddy:H3K4me3.t1_rep2_chip_seq_narrowPeak	ENCFF304IKY	N/A
ChIP-seq	tim-reddy:H3K4me3.t1	ENCSR928FDN	GSE91359	tim-reddy:H3K4me3.t1_rep3_chip_seq_bam	ENCFF626NXS	N/A
ChIP-seq	tim-reddy:H3K4me3.t1	ENCSR928FDN	GSE91359	tim-reddy:H3K4me3.t1_rep3_chip_seq_bigWig	ENCFF908SAV	N/A
ChIP-seq	tim-reddy:H3K4me3.t1	ENCSR928FDN	GSE91359	tim-reddy:H3K4me3.t1_rep3_chip_seq_fastq	ENCFF983RTM	SRR5093195
ChIP-seq	tim-reddy:H3K4me3.t1	ENCSR928FDN	GSE91359	tim-reddy:H3K4me3.t1_rep3_chip_seq_narrowPeak	ENCFF994POH	N/A
ChIP-seq	tim-reddy:H3K4me3.t2	ENCSR252FZA	GSE91227	tim-reddy:H3K4me3.t2_rep1_chip_seq_bam	ENCFF353INF	N/A
ChIP-seq	tim-reddy:H3K4me3.t2	ENCSR252FZA	GSE91227	tim-reddy:H3K4me3.t2_rep1_chip_seq_bigWig	ENCFF357HBR	N/A
ChIP-seq	tim-reddy:H3K4me3.t2	ENCSR252FZA	GSE91227	tim-reddy:H3K4me3.t2_rep1_chip_seq_fastq	ENCFF088WOR	SRR5093361
ChIP-seq	tim-reddy:H3K4me3.t2	ENCSR252FZA	GSE91227	tim-reddy:H3K4me3.t2_rep1_chip_seq_narrowPeak	ENCFF836BFY	N/A
ChIP-seq	tim-reddy:H3K4me3.t2	ENCSR252FZA	GSE91227	tim-reddy:H3K4me3.t2_rep2_chip_seq_bam	ENCFF793THO	N/A
ChIP-seq	tim-reddy:H3K4me3.t2	ENCSR252FZA	GSE91227	tim-reddy:H3K4me3.t2_rep2_chip_seq_bigWig	ENCFF164CBI	N/A
ChIP-seq	tim-reddy:H3K4me3.t2	ENCSR252FZA	GSE91227	tim-reddy:H3K4me3.t2_rep2_chip_seq_fastq	ENCFF463BIC	SRR5093359
ChIP-seq	tim-reddy:H3K4me3.t2	ENCSR252FZA	GSE91227	tim-reddy:H3K4me3.t2_rep2_chip_seq_narrowPeak	ENCFF558FNN	N/A
ChIP-seq	tim-reddy:H3K4me3.t2	ENCSR252FZA	GSE91227	tim-reddy:H3K4me3.t2_rep3_chip_seq_bam	ENCFF246ONO	N/A
ChIP-seq	tim-reddy:H3K4me3.t2	ENCSR252FZA	GSE91227	tim-reddy:H3K4me3.t2_rep3_chip_seq_bigWig	ENCFF310WTY	N/A
ChIP-seq	tim-reddy:H3K4me3.t2	ENCSR252FZA	GSE91227	tim-reddy:H3K4me3.t2_rep3_chip_seq_fastq	ENCFF396GBZ	SRR5093360
ChIP-seq	tim-reddy:H3K4me3.t2	ENCSR252FZA	GSE91227	tim-reddy:H3K4me3.t2_rep3_chip_seq_narrowPeak	ENCFF677HDL	N/A
ChIP-seq	tim-reddy:H3K4me3.t3	ENCSR483JJT	GSE91272	tim-reddy:H3K4me3.t3_rep1_chip_seq_bam	ENCFF860KCC	N/A
ChIP-seq	tim-reddy:H3K4me3.t3	ENCSR483JJT	GSE91272	tim-reddy:H3K4me3.t3_rep1_chip_seq_bigWig	ENCFF655FCK	N/A
ChIP-seq	tim-reddy:H3K4me3.t3	ENCSR483JJT	GSE91272	tim-reddy:H3K4me3.t3_rep1_chip_seq_fastq	ENCFF356EDV	SRR5092934
ChIP-seq	tim-reddy:H3K4me3.t3	ENCSR483JJT	GSE91272	tim-reddy:H3K4me3.t3_rep1_chip_seq_narrowPeak	ENCFF527DKB	N/A
ChIP-seq	tim-reddy:H3K4me3.t3	ENCSR483JJT	GSE91272	tim-reddy:H3K4me3.t3_rep3_chip_seq_bam	ENCFF350NHR	N/A
ChIP-seq	tim-reddy:H3K4me3.t3	ENCSR483JJT	GSE91272	tim-reddy:H3K4me3.t3_rep3_chip_seq_bigWig	ENCFF905OUM	N/A
ChIP-seq	tim-reddy:H3K4me3.t3	ENCSR483JJT	GSE91272	tim-reddy:H3K4me3.t3_rep3_chip_seq_fastq	ENCFF118PCB	SRR5092933
ChIP-seq	tim-reddy:H3K4me3.t3	ENCSR483JJT	GSE91272	tim-reddy:H3K4me3.t3_rep3_chip_seq_narrowPeak	ENCFF292KDE	N/A
ChIP-seq	tim-reddy:H3K4me3.t4	ENCSR901AAW	GSE91351	tim-reddy:H3K4me3.t4_rep1_chip_seq_bam	ENCFF228MSV	N/A
ChIP-seq	tim-reddy:H3K4me3.t4	ENCSR901AAW	GSE91351	tim-reddy:H3K4me3.t4_rep1_chip_seq_bigWig	ENCFF198XSX	N/A
ChIP-seq	tim-reddy:H3K4me3.t4	ENCSR901AAW	GSE91351	tim-reddy:H3K4me3.t4_rep1_chip_seq_fastq	ENCFF801PXD	SRR5093171
ChIP-seq	tim-reddy:H3K4me3.t4	ENCSR901AAW	GSE91351	tim-reddy:H3K4me3.t4_rep1_chip_seq_narrowPeak	ENCFF062ADA	N/A
ChIP-seq	tim-reddy:H3K4me3.t4	ENCSR901AAW	GSE91351	tim-reddy:H3K4me3.t4_rep2_chip_seq_bam	ENCFF255EAX	N/A
ChIP-seq	tim-reddy:H3K4me3.t4	ENCSR901AAW	GSE91351	tim-reddy:H3K4me3.t4_rep2_chip_seq_bigWig	ENCFF555VHA	N/A
ChIP-seq	tim-reddy:H3K4me3.t4	ENCSR901AAW	GSE91351	tim-reddy:H3K4me3.t4_rep2_chip_seq_fastq	ENCFF162JOP	SRR5093170
ChIP-seq	tim-reddy:H3K4me3.t4	ENCSR901AAW	GSE91351	tim-reddy:H3K4me3.t4_rep2_chip_seq_narrowPeak	ENCFF011KCJ	N/A
ChIP-seq	tim-reddy:H3K4me3.t5	ENCSR524UOX	GSE91277	tim-reddy:H3K4me3.t5_rep1_chip_seq_bam	ENCFF451NXU	N/A
ChIP-seq	tim-reddy:H3K4me3.t5	ENCSR524UOX	GSE91277	tim-reddy:H3K4me3.t5_rep1_chip_seq_bigWig	ENCFF305RPR	N/A
ChIP-seq	tim-reddy:H3K4me3.t5	ENCSR524UOX	GSE91277	tim-reddy:H3K4me3.t5_rep1_chip_seq_fastq	ENCFF296FRX	SRR5092948
ChIP-seq	tim-reddy:H3K4me3.t5	ENCSR524UOX	GSE91277	tim-reddy:H3K4me3.t5_rep1_chip_seq_narrowPeak	ENCFF789KGD	N/A
ChIP-seq	tim-reddy:H3K4me3.t5	ENCSR524UOX	GSE91277	tim-reddy:H3K4me3.t5_rep2_chip_seq_bam	ENCFF008PPX	N/A
ChIP-seq	tim-reddy:H3K4me3.t5	ENCSR524UOX	GSE91277	tim-reddy:H3K4me3.t5_rep2_chip_seq_bigWig	ENCFF365ARL	N/A
ChIP-seq	tim-reddy:H3K4me3.t5	ENCSR524UOX	GSE91277	tim-reddy:H3K4me3.t5_rep2_chip_seq_fastq	ENCFF611OLV	SRR5092950
ChIP-seq	tim-reddy:H3K4me3.t5	ENCSR524UOX	GSE91277	tim-reddy:H3K4me3.t5_rep2_chip_seq_narrowPeak	ENCFF279EVH	N/A
ChIP-seq	tim-reddy:H3K4me3.t5	ENCSR524UOX	GSE91277	tim-reddy:H3K4me3.t5_rep3_chip_seq_bam	ENCFF964DOV	N/A
ChIP-seq	tim-reddy:H3K4me3.t5	ENCSR524UOX	GSE91277	tim-reddy:H3K4me3.t5_rep3_chip_seq_bigWig	ENCFF119FLE	N/A
ChIP-seq	tim-reddy:H3K4me3.t5	ENCSR524UOX	GSE91277	tim-reddy:H3K4me3.t5_rep3_chip_seq_fastq	ENCFF287CID	SRR5092949
ChIP-seq	tim-reddy:H3K4me3.t5	ENCSR524UOX	GSE91277	tim-reddy:H3K4me3.t5_rep3_chip_seq_narrowPeak	ENCFF421IEC	N/A
ChIP-seq	tim-reddy:H3K4me3.t6	ENCSR646OPC	GSE91309	tim-reddy:H3K4me3.t6_rep1_chip_seq_bam	ENCFF756TLV	N/A
ChIP-seq	tim-reddy:H3K4me3.t6	ENCSR646OPC	GSE91309	tim-reddy:H3K4me3.t6_rep1_chip_seq_bigWig	ENCFF860EXE	N/A
ChIP-seq	tim-reddy:H3K4me3.t6	ENCSR646OPC	GSE91309	tim-reddy:H3K4me3.t6_rep1_chip_seq_fastq	ENCFF986CAH	SRR5093044
ChIP-seq	tim-reddy:H3K4me3.t6	ENCSR646OPC	GSE91309	tim-reddy:H3K4me3.t6_rep1_chip_seq_narrowPeak	ENCFF860PKF	N/A
ChIP-seq	tim-reddy:H3K4me3.t6	ENCSR646OPC	GSE91309	tim-reddy:H3K4me3.t6_rep2_chip_seq_bam	ENCFF691HHJ	N/A
ChIP-seq	tim-reddy:H3K4me3.t6	ENCSR646OPC	GSE91309	tim-reddy:H3K4me3.t6_rep2_chip_seq_bigWig	ENCFF965FWW	N/A
ChIP-seq	tim-reddy:H3K4me3.t6	ENCSR646OPC	GSE91309	tim-reddy:H3K4me3.t6_rep2_chip_seq_fastq	ENCFF218OGU	SRR5093043
ChIP-seq	tim-reddy:H3K4me3.t6	ENCSR646OPC	GSE91309	tim-reddy:H3K4me3.t6_rep2_chip_seq_narrowPeak	ENCFF186FMN	N/A
ChIP-seq	tim-reddy:H3K4me3.t6	ENCSR646OPC	GSE91309	tim-reddy:H3K4me3.t6_rep3_chip_seq_bam	ENCFF847SFK	N/A
ChIP-seq	tim-reddy:H3K4me3.t6	ENCSR646OPC	GSE91309	tim-reddy:H3K4me3.t6_rep3_chip_seq_bigWig	ENCFF640VEX	N/A
ChIP-seq	tim-reddy:H3K4me3.t6	ENCSR646OPC	GSE91309	tim-reddy:H3K4me3.t6_rep3_chip_seq_fastq	ENCFF356AMS	SRR5093045
ChIP-seq	tim-reddy:H3K4me3.t6	ENCSR646OPC	GSE91309	tim-reddy:H3K4me3.t6_rep3_chip_seq_narrowPeak	ENCFF703PQE	N/A
ChIP-seq	tim-reddy:H3K4me3.t7	ENCSR285FZP	GSE91234	tim-reddy:H3K4me3.t7_rep1_chip_seq_bam	ENCFF029JEZ	N/A
ChIP-seq	tim-reddy:H3K4me3.t7	ENCSR285FZP	GSE91234	tim-reddy:H3K4me3.t7_rep1_chip_seq_bigWig	ENCFF997HPF	N/A
ChIP-seq	tim-reddy:H3K4me3.t7	ENCSR285FZP	GSE91234	tim-reddy:H3K4me3.t7_rep1_chip_seq_fastq	ENCFF336UWC	SRR5093384
ChIP-seq	tim-reddy:H3K4me3.t7	ENCSR285FZP	GSE91234	tim-reddy:H3K4me3.t7_rep1_chip_seq_narrowPeak	ENCFF498MRD	N/A
ChIP-seq	tim-reddy:H3K4me3.t7	ENCSR285FZP	GSE91234	tim-reddy:H3K4me3.t7_rep2_chip_seq_bam	ENCFF813RLF	N/A
ChIP-seq	tim-reddy:H3K4me3.t7	ENCSR285FZP	GSE91234	tim-reddy:H3K4me3.t7_rep2_chip_seq_bigWig	ENCFF105TVK	N/A
ChIP-seq	tim-reddy:H3K4me3.t7	ENCSR285FZP	GSE91234	tim-reddy:H3K4me3.t7_rep2_chip_seq_fastq	ENCFF788QPV	SRR5093382
ChIP-seq	tim-reddy:H3K4me3.t7	ENCSR285FZP	GSE91234	tim-reddy:H3K4me3.t7_rep2_chip_seq_narrowPeak	ENCFF232QXY	N/A
ChIP-seq	tim-reddy:H3K4me3.t7	ENCSR285FZP	GSE91234	tim-reddy:H3K4me3.t7_rep3_chip_seq_bam	ENCFF938GXF	N/A
ChIP-seq	tim-reddy:H3K4me3.t7	ENCSR285FZP	GSE91234	tim-reddy:H3K4me3.t7_rep3_chip_seq_bigWig	ENCFF748MHS	N/A
ChIP-seq	tim-reddy:H3K4me3.t7	ENCSR285FZP	GSE91234	tim-reddy:H3K4me3.t7_rep3_chip_seq_fastq	ENCFF688BTY	SRR5093383
ChIP-seq	tim-reddy:H3K4me3.t7	ENCSR285FZP	GSE91234	tim-reddy:H3K4me3.t7_rep3_chip_seq_narrowPeak	ENCFF480IKZ	N/A
ChIP-seq	tim-reddy:H3K4me3.t8	ENCSR618MUP	GSE91302	tim-reddy:H3K4me3.t8_rep1_chip_seq_bam	ENCFF621DTD	N/A
ChIP-seq	tim-reddy:H3K4me3.t8	ENCSR618MUP	GSE91302	tim-reddy:H3K4me3.t8_rep1_chip_seq_bigWig	ENCFF635AAS	N/A
ChIP-seq	tim-reddy:H3K4me3.t8	ENCSR618MUP	GSE91302	tim-reddy:H3K4me3.t8_rep1_chip_seq_fastq	ENCFF070BNK	SRR5093024
ChIP-seq	tim-reddy:H3K4me3.t8	ENCSR618MUP	GSE91302	tim-reddy:H3K4me3.t8_rep1_chip_seq_narrowPeak	ENCFF280VYT	N/A
ChIP-seq	tim-reddy:H3K4me3.t8	ENCSR618MUP	GSE91302	tim-reddy:H3K4me3.t8_rep2_chip_seq_bam	ENCFF686ZYP	N/A
ChIP-seq	tim-reddy:H3K4me3.t8	ENCSR618MUP	GSE91302	tim-reddy:H3K4me3.t8_rep2_chip_seq_bigWig	ENCFF388TGM	N/A
ChIP-seq	tim-reddy:H3K4me3.t8	ENCSR618MUP	GSE91302	tim-reddy:H3K4me3.t8_rep2_chip_seq_fastq	ENCFF342KGA	SRR5093025
ChIP-seq	tim-reddy:H3K4me3.t8	ENCSR618MUP	GSE91302	tim-reddy:H3K4me3.t8_rep2_chip_seq_narrowPeak	ENCFF273WQK	N/A
ChIP-seq	tim-reddy:H3K9me3.t00	ENCSR775TAI	GSE91335	tim-reddy:H3K9me3.t00_rep1_chip_seq_bam	ENCFF801BLX	N/A
ChIP-seq	tim-reddy:H3K9me3.t00	ENCSR775TAI	GSE91335	tim-reddy:H3K9me3.t00_rep1_chip_seq_bigWig	ENCFF740BGH	N/A
ChIP-seq	tim-reddy:H3K9me3.t00	ENCSR775TAI	GSE91335	tim-reddy:H3K9me3.t00_rep1_chip_seq_broadPeak	ENCFF407FDL	N/A
ChIP-seq	tim-reddy:H3K9me3.t00	ENCSR775TAI	GSE91335	tim-reddy:H3K9me3.t00_rep1_chip_seq_fastq	ENCFF254VJY	SRR5093123
ChIP-seq	tim-reddy:H3K9me3.t00	ENCSR775TAI	GSE91335	tim-reddy:H3K9me3.t00_rep2_chip_seq_bam	ENCFF601UWZ	N/A
ChIP-seq	tim-reddy:H3K9me3.t00	ENCSR775TAI	GSE91335	tim-reddy:H3K9me3.t00_rep2_chip_seq_bigWig	ENCFF834BNN	N/A
ChIP-seq	tim-reddy:H3K9me3.t00	ENCSR775TAI	GSE91335	tim-reddy:H3K9me3.t00_rep2_chip_seq_broadPeak	ENCFF911EGN	N/A
ChIP-seq	tim-reddy:H3K9me3.t00	ENCSR775TAI	GSE91335	tim-reddy:H3K9me3.t00_rep2_chip_seq_fastq	ENCFF396AMX	SRR5093125
ChIP-seq	tim-reddy:H3K9me3.t00	ENCSR775TAI	GSE91335	tim-reddy:H3K9me3.t00_rep3_chip_seq_bam	ENCFF593SUF	N/A
ChIP-seq	tim-reddy:H3K9me3.t00	ENCSR775TAI	GSE91335	tim-reddy:H3K9me3.t00_rep3_chip_seq_bigWig	ENCFF545TKX	N/A
ChIP-seq	tim-reddy:H3K9me3.t00	ENCSR775TAI	GSE91335	tim-reddy:H3K9me3.t00_rep3_chip_seq_broadPeak	ENCFF155GOT	N/A
ChIP-seq	tim-reddy:H3K9me3.t00	ENCSR775TAI	GSE91335	tim-reddy:H3K9me3.t00_rep3_chip_seq_fastq	ENCFF835XFR	SRR5093124
ChIP-seq	tim-reddy:H3K9me3.t05	ENCSR109KEL	GSE91203	tim-reddy:H3K9me3.t05_rep1_chip_seq_bam	ENCFF104HAJ	N/A
ChIP-seq	tim-reddy:H3K9me3.t05	ENCSR109KEL	GSE91203	tim-reddy:H3K9me3.t05_rep1_chip_seq_bigWig	ENCFF999YNF	N/A
ChIP-seq	tim-reddy:H3K9me3.t05	ENCSR109KEL	GSE91203	tim-reddy:H3K9me3.t05_rep1_chip_seq_broadPeak	ENCFF495NVD	N/A
ChIP-seq	tim-reddy:H3K9me3.t05	ENCSR109KEL	GSE91203	tim-reddy:H3K9me3.t05_rep1_chip_seq_fastq	ENCFF342TZT	SRR5093284
ChIP-seq	tim-reddy:H3K9me3.t05	ENCSR109KEL	GSE91203	tim-reddy:H3K9me3.t05_rep2_chip_seq_bam	ENCFF347MVV	N/A
ChIP-seq	tim-reddy:H3K9me3.t05	ENCSR109KEL	GSE91203	tim-reddy:H3K9me3.t05_rep2_chip_seq_bigWig	ENCFF506ALK	N/A
ChIP-seq	tim-reddy:H3K9me3.t05	ENCSR109KEL	GSE91203	tim-reddy:H3K9me3.t05_rep2_chip_seq_broadPeak	ENCFF016SNC	N/A
ChIP-seq	tim-reddy:H3K9me3.t05	ENCSR109KEL	GSE91203	tim-reddy:H3K9me3.t05_rep2_chip_seq_fastq	ENCFF429BGF	SRR5093285
ChIP-seq	tim-reddy:H3K9me3.t05	ENCSR109KEL	GSE91203	tim-reddy:H3K9me3.t05_rep3_chip_seq_bam	ENCFF038OVM	N/A
ChIP-seq	tim-reddy:H3K9me3.t05	ENCSR109KEL	GSE91203	tim-reddy:H3K9me3.t05_rep3_chip_seq_bigWig	ENCFF330NNS	N/A
ChIP-seq	tim-reddy:H3K9me3.t05	ENCSR109KEL	GSE91203	tim-reddy:H3K9me3.t05_rep3_chip_seq_broadPeak	ENCFF772QSH	N/A
ChIP-seq	tim-reddy:H3K9me3.t05	ENCSR109KEL	GSE91203	tim-reddy:H3K9me3.t05_rep3_chip_seq_fastq	ENCFF631MGA	SRR5093283
ChIP-seq	tim-reddy:H3K9me3.t10	ENCSR013RTF	GSE91192	tim-reddy:H3K9me3.t10_rep1_chip_seq_bam	ENCFF960RHJ	N/A
ChIP-seq	tim-reddy:H3K9me3.t10	ENCSR013RTF	GSE91192	tim-reddy:H3K9me3.t10_rep1_chip_seq_bigWig	ENCFF519XDW	N/A
ChIP-seq	tim-reddy:H3K9me3.t10	ENCSR013RTF	GSE91192	tim-reddy:H3K9me3.t10_rep1_chip_seq_broadPeak	ENCFF751KCL	N/A
ChIP-seq	tim-reddy:H3K9me3.t10	ENCSR013RTF	GSE91192	tim-reddy:H3K9me3.t10_rep1_chip_seq_fastq	ENCFF175TUJ	SRR5093239
ChIP-seq	tim-reddy:H3K9me3.t10	ENCSR013RTF	GSE91192	tim-reddy:H3K9me3.t10_rep2_chip_seq_bam	ENCFF212TEM	N/A
ChIP-seq	tim-reddy:H3K9me3.t10	ENCSR013RTF	GSE91192	tim-reddy:H3K9me3.t10_rep2_chip_seq_bigWig	ENCFF073TZS	N/A
ChIP-seq	tim-reddy:H3K9me3.t10	ENCSR013RTF	GSE91192	tim-reddy:H3K9me3.t10_rep2_chip_seq_broadPeak	ENCFF087NKM	N/A
ChIP-seq	tim-reddy:H3K9me3.t10	ENCSR013RTF	GSE91192	tim-reddy:H3K9me3.t10_rep2_chip_seq_fastq	ENCFF739HUA	SRR5093241
ChIP-seq	tim-reddy:H3K9me3.t10	ENCSR013RTF	GSE91192	tim-reddy:H3K9me3.t10_rep3_chip_seq_bam	ENCFF492RUO	N/A
ChIP-seq	tim-reddy:H3K9me3.t10	ENCSR013RTF	GSE91192	tim-reddy:H3K9me3.t10_rep3_chip_seq_bigWig	ENCFF767JLI	N/A
ChIP-seq	tim-reddy:H3K9me3.t10	ENCSR013RTF	GSE91192	tim-reddy:H3K9me3.t10_rep3_chip_seq_broadPeak	ENCFF831YHW	N/A
ChIP-seq	tim-reddy:H3K9me3.t10	ENCSR013RTF	GSE91192	tim-reddy:H3K9me3.t10_rep3_chip_seq_fastq	ENCFF407SLZ	SRR5093240
ChIP-seq	tim-reddy:H3K9me3.t12	ENCSR451MJX	GSE91266	tim-reddy:H3K9me3.t12_rep1_chip_seq_bam	ENCFF191YKO	N/A
ChIP-seq	tim-reddy:H3K9me3.t12	ENCSR451MJX	GSE91266	tim-reddy:H3K9me3.t12_rep1_chip_seq_bigWig	ENCFF709RQE	N/A
ChIP-seq	tim-reddy:H3K9me3.t12	ENCSR451MJX	GSE91266	tim-reddy:H3K9me3.t12_rep1_chip_seq_broadPeak	ENCFF592HLM	N/A
ChIP-seq	tim-reddy:H3K9me3.t12	ENCSR451MJX	GSE91266	tim-reddy:H3K9me3.t12_rep1_chip_seq_fastq	ENCFF860ZHN	SRR5092914
ChIP-seq	tim-reddy:H3K9me3.t12	ENCSR451MJX	GSE91266	tim-reddy:H3K9me3.t12_rep2_chip_seq_bam	ENCFF693ABF	N/A
ChIP-seq	tim-reddy:H3K9me3.t12	ENCSR451MJX	GSE91266	tim-reddy:H3K9me3.t12_rep2_chip_seq_bigWig	ENCFF899HGS	N/A
ChIP-seq	tim-reddy:H3K9me3.t12	ENCSR451MJX	GSE91266	tim-reddy:H3K9me3.t12_rep2_chip_seq_broadPeak	ENCFF549JUT	N/A
ChIP-seq	tim-reddy:H3K9me3.t12	ENCSR451MJX	GSE91266	tim-reddy:H3K9me3.t12_rep2_chip_seq_fastq	ENCFF410QJG	SRR5092916
ChIP-seq	tim-reddy:H3K9me3.t12	ENCSR451MJX	GSE91266	tim-reddy:H3K9me3.t12_rep3_chip_seq_bam	ENCFF637UXO	N/A
ChIP-seq	tim-reddy:H3K9me3.t12	ENCSR451MJX	GSE91266	tim-reddy:H3K9me3.t12_rep3_chip_seq_bigWig	ENCFF301FLZ	N/A
ChIP-seq	tim-reddy:H3K9me3.t12	ENCSR451MJX	GSE91266	tim-reddy:H3K9me3.t12_rep3_chip_seq_broadPeak	ENCFF314NWK	N/A
ChIP-seq	tim-reddy:H3K9me3.t12	ENCSR451MJX	GSE91266	tim-reddy:H3K9me3.t12_rep3_chip_seq_fastq	ENCFF705BEQ	SRR5092915
ChIP-seq	tim-reddy:H3K9me3.t1	ENCSR954SQX	GSE91367	tim-reddy:H3K9me3.t1_rep1_chip_seq_bam	ENCFF506RDX	N/A
ChIP-seq	tim-reddy:H3K9me3.t1	ENCSR954SQX	GSE91367	tim-reddy:H3K9me3.t1_rep1_chip_seq_bigWig	ENCFF651VBH	N/A
ChIP-seq	tim-reddy:H3K9me3.t1	ENCSR954SQX	GSE91367	tim-reddy:H3K9me3.t1_rep1_chip_seq_broadPeak	ENCFF843WCH	N/A
ChIP-seq	tim-reddy:H3K9me3.t1	ENCSR954SQX	GSE91367	tim-reddy:H3K9me3.t1_rep1_chip_seq_fastq	ENCFF365BLL	SRR5093213
ChIP-seq	tim-reddy:H3K9me3.t1	ENCSR954SQX	GSE91367	tim-reddy:H3K9me3.t1_rep2_chip_seq_bam	ENCFF255NPI	N/A
ChIP-seq	tim-reddy:H3K9me3.t1	ENCSR954SQX	GSE91367	tim-reddy:H3K9me3.t1_rep2_chip_seq_bigWig	ENCFF267VTJ	N/A
ChIP-seq	tim-reddy:H3K9me3.t1	ENCSR954SQX	GSE91367	tim-reddy:H3K9me3.t1_rep2_chip_seq_broadPeak	ENCFF560TDP	N/A
ChIP-seq	tim-reddy:H3K9me3.t1	ENCSR954SQX	GSE91367	tim-reddy:H3K9me3.t1_rep2_chip_seq_fastq	ENCFF652EOQ	SRR5093211
ChIP-seq	tim-reddy:H3K9me3.t1	ENCSR954SQX	GSE91367	tim-reddy:H3K9me3.t1_rep3_chip_seq_bam	ENCFF544EBT	N/A
ChIP-seq	tim-reddy:H3K9me3.t1	ENCSR954SQX	GSE91367	tim-reddy:H3K9me3.t1_rep3_chip_seq_bigWig	ENCFF505HII	N/A
ChIP-seq	tim-reddy:H3K9me3.t1	ENCSR954SQX	GSE91367	tim-reddy:H3K9me3.t1_rep3_chip_seq_broadPeak	ENCFF239AFE	N/A
ChIP-seq	tim-reddy:H3K9me3.t1	ENCSR954SQX	GSE91367	tim-reddy:H3K9me3.t1_rep3_chip_seq_fastq	ENCFF574GXP	SRR5093212
ChIP-seq	tim-reddy:H3K9me3.t2	ENCSR936UEX	GSE91360	tim-reddy:H3K9me3.t2_rep1_chip_seq_bam	ENCFF255IZP	N/A
ChIP-seq	tim-reddy:H3K9me3.t2	ENCSR936UEX	GSE91360	tim-reddy:H3K9me3.t2_rep1_chip_seq_bigWig	ENCFF319SRI	N/A
ChIP-seq	tim-reddy:H3K9me3.t2	ENCSR936UEX	GSE91360	tim-reddy:H3K9me3.t2_rep1_chip_seq_broadPeak	ENCFF110DIF	N/A
ChIP-seq	tim-reddy:H3K9me3.t2	ENCSR936UEX	GSE91360	tim-reddy:H3K9me3.t2_rep1_chip_seq_fastq	ENCFF742SOK	SRR5093198
ChIP-seq	tim-reddy:H3K9me3.t2	ENCSR936UEX	GSE91360	tim-reddy:H3K9me3.t2_rep2_chip_seq_bam	ENCFF362ZKX	N/A
ChIP-seq	tim-reddy:H3K9me3.t2	ENCSR936UEX	GSE91360	tim-reddy:H3K9me3.t2_rep2_chip_seq_bigWig	ENCFF511GXE	N/A
ChIP-seq	tim-reddy:H3K9me3.t2	ENCSR936UEX	GSE91360	tim-reddy:H3K9me3.t2_rep2_chip_seq_broadPeak	ENCFF707JPY	N/A
ChIP-seq	tim-reddy:H3K9me3.t2	ENCSR936UEX	GSE91360	tim-reddy:H3K9me3.t2_rep2_chip_seq_fastq	ENCFF025FVI	SRR5093196
ChIP-seq	tim-reddy:H3K9me3.t2	ENCSR936UEX	GSE91360	tim-reddy:H3K9me3.t2_rep3_chip_seq_bam	ENCFF354TIL	N/A
ChIP-seq	tim-reddy:H3K9me3.t2	ENCSR936UEX	GSE91360	tim-reddy:H3K9me3.t2_rep3_chip_seq_bigWig	ENCFF152AZU	N/A
ChIP-seq	tim-reddy:H3K9me3.t2	ENCSR936UEX	GSE91360	tim-reddy:H3K9me3.t2_rep3_chip_seq_broadPeak	ENCFF393FRZ	N/A
ChIP-seq	tim-reddy:H3K9me3.t2	ENCSR936UEX	GSE91360	tim-reddy:H3K9me3.t2_rep3_chip_seq_fastq	ENCFF969VSN	SRR5093197
ChIP-seq	tim-reddy:H3K9me3.t3	ENCSR354ERB	GSE91249	tim-reddy:H3K9me3.t3_rep1_chip_seq_bam	ENCFF561NAT	N/A
ChIP-seq	tim-reddy:H3K9me3.t3	ENCSR354ERB	GSE91249	tim-reddy:H3K9me3.t3_rep1_chip_seq_bigWig	ENCFF020JRV	N/A
ChIP-seq	tim-reddy:H3K9me3.t3	ENCSR354ERB	GSE91249	tim-reddy:H3K9me3.t3_rep1_chip_seq_broadPeak	ENCFF698QQX	N/A
ChIP-seq	tim-reddy:H3K9me3.t3	ENCSR354ERB	GSE91249	tim-reddy:H3K9me3.t3_rep1_chip_seq_fastq	ENCFF057OHI	SRR5093428
ChIP-seq	tim-reddy:H3K9me3.t3	ENCSR354ERB	GSE91249	tim-reddy:H3K9me3.t3_rep2_chip_seq_bam	ENCFF094QHL	N/A
ChIP-seq	tim-reddy:H3K9me3.t3	ENCSR354ERB	GSE91249	tim-reddy:H3K9me3.t3_rep2_chip_seq_bigWig	ENCFF288BZI	N/A
ChIP-seq	tim-reddy:H3K9me3.t3	ENCSR354ERB	GSE91249	tim-reddy:H3K9me3.t3_rep2_chip_seq_broadPeak	ENCFF064PTH	N/A
ChIP-seq	tim-reddy:H3K9me3.t3	ENCSR354ERB	GSE91249	tim-reddy:H3K9me3.t3_rep2_chip_seq_fastq	ENCFF074RTO	SRR5093427
ChIP-seq	tim-reddy:H3K9me3.t3	ENCSR354ERB	GSE91249	tim-reddy:H3K9me3.t3_rep3_chip_seq_bam	ENCFF103QEJ	N/A
ChIP-seq	tim-reddy:H3K9me3.t3	ENCSR354ERB	GSE91249	tim-reddy:H3K9me3.t3_rep3_chip_seq_bigWig	ENCFF530PFO	N/A
ChIP-seq	tim-reddy:H3K9me3.t3	ENCSR354ERB	GSE91249	tim-reddy:H3K9me3.t3_rep3_chip_seq_broadPeak	ENCFF020WCG	N/A
ChIP-seq	tim-reddy:H3K9me3.t3	ENCSR354ERB	GSE91249	tim-reddy:H3K9me3.t3_rep3_chip_seq_fastq	ENCFF547AQD	SRR5093426
ChIP-seq	tim-reddy:H3K9me3.t4	ENCSR037DAC	GSE91195	tim-reddy:H3K9me3.t4_rep1_chip_seq_bam	ENCFF351ATQ	N/A
ChIP-seq	tim-reddy:H3K9me3.t4	ENCSR037DAC	GSE91195	tim-reddy:H3K9me3.t4_rep1_chip_seq_bigWig	ENCFF505MRH	N/A
ChIP-seq	tim-reddy:H3K9me3.t4	ENCSR037DAC	GSE91195	tim-reddy:H3K9me3.t4_rep1_chip_seq_broadPeak	ENCFF989OUJ	N/A
ChIP-seq	tim-reddy:H3K9me3.t4	ENCSR037DAC	GSE91195	tim-reddy:H3K9me3.t4_rep1_chip_seq_fastq	ENCFF496FNG	SRR5093253
ChIP-seq	tim-reddy:H3K9me3.t4	ENCSR037DAC	GSE91195	tim-reddy:H3K9me3.t4_rep2_chip_seq_bam	ENCFF628HFK	N/A
ChIP-seq	tim-reddy:H3K9me3.t4	ENCSR037DAC	GSE91195	tim-reddy:H3K9me3.t4_rep2_chip_seq_bigWig	ENCFF391YQG	N/A
ChIP-seq	tim-reddy:H3K9me3.t4	ENCSR037DAC	GSE91195	tim-reddy:H3K9me3.t4_rep2_chip_seq_broadPeak	ENCFF696CCS	N/A
ChIP-seq	tim-reddy:H3K9me3.t4	ENCSR037DAC	GSE91195	tim-reddy:H3K9me3.t4_rep2_chip_seq_fastq	ENCFF681CKZ	SRR5093252
ChIP-seq	tim-reddy:H3K9me3.t4	ENCSR037DAC	GSE91195	tim-reddy:H3K9me3.t4_rep3_chip_seq_bam	ENCFF899BFG	N/A
ChIP-seq	tim-reddy:H3K9me3.t4	ENCSR037DAC	GSE91195	tim-reddy:H3K9me3.t4_rep3_chip_seq_bigWig	ENCFF261PDD	N/A
ChIP-seq	tim-reddy:H3K9me3.t4	ENCSR037DAC	GSE91195	tim-reddy:H3K9me3.t4_rep3_chip_seq_broadPeak	ENCFF038ESA	N/A
ChIP-seq	tim-reddy:H3K9me3.t4	ENCSR037DAC	GSE91195	tim-reddy:H3K9me3.t4_rep3_chip_seq_fastq	ENCFF925UEX	SRR5093251
ChIP-seq	tim-reddy:H3K9me3.t5	ENCSR299MNA	GSE91239	tim-reddy:H3K9me3.t5_rep1_chip_seq_bam	ENCFF618XEZ	N/A
ChIP-seq	tim-reddy:H3K9me3.t5	ENCSR299MNA	GSE91239	tim-reddy:H3K9me3.t5_rep1_chip_seq_bigWig	ENCFF749TKF	N/A
ChIP-seq	tim-reddy:H3K9me3.t5	ENCSR299MNA	GSE91239	tim-reddy:H3K9me3.t5_rep1_chip_seq_fastq	ENCFF517HWM	SRR5093398
ChIP-seq	tim-reddy:H3K9me3.t5	ENCSR299MNA	GSE91239	tim-reddy:H3K9me3.t5_rep2_chip_seq_bam	ENCFF342BGY	N/A
ChIP-seq	tim-reddy:H3K9me3.t5	ENCSR299MNA	GSE91239	tim-reddy:H3K9me3.t5_rep2_chip_seq_bigWig	ENCFF135PGK	N/A
ChIP-seq	tim-reddy:H3K9me3.t5	ENCSR299MNA	GSE91239	tim-reddy:H3K9me3.t5_rep2_chip_seq_broadPeak	ENCFF105LFJ	N/A
ChIP-seq	tim-reddy:H3K9me3.t5	ENCSR299MNA	GSE91239	tim-reddy:H3K9me3.t5_rep2_chip_seq_fastq	ENCFF494ULZ	SRR5093399
ChIP-seq	tim-reddy:H3K9me3.t5	ENCSR299MNA	GSE91239	tim-reddy:H3K9me3.t5_rep3_chip_seq_bam	ENCFF422VBE	N/A
ChIP-seq	tim-reddy:H3K9me3.t5	ENCSR299MNA	GSE91239	tim-reddy:H3K9me3.t5_rep3_chip_seq_bigWig	ENCFF425KES	N/A
ChIP-seq	tim-reddy:H3K9me3.t5	ENCSR299MNA	GSE91239	tim-reddy:H3K9me3.t5_rep3_chip_seq_broadPeak	ENCFF884WWI	N/A
ChIP-seq	tim-reddy:H3K9me3.t5	ENCSR299MNA	GSE91239	tim-reddy:H3K9me3.t5_rep3_chip_seq_fastq	ENCFF014VJM	SRR5093397
ChIP-seq	tim-reddy:H3K9me3.t6	ENCSR032SCO	GSE91194	tim-reddy:H3K9me3.t6_rep1_chip_seq_bam	ENCFF489TVV	N/A
ChIP-seq	tim-reddy:H3K9me3.t6	ENCSR032SCO	GSE91194	tim-reddy:H3K9me3.t6_rep1_chip_seq_bigWig	ENCFF163SSQ	N/A
ChIP-seq	tim-reddy:H3K9me3.t6	ENCSR032SCO	GSE91194	tim-reddy:H3K9me3.t6_rep1_chip_seq_fastq	ENCFF987TRV	SRR5093256
ChIP-seq	tim-reddy:H3K9me3.t6	ENCSR032SCO	GSE91194	tim-reddy:H3K9me3.t6_rep2_chip_seq_bam	ENCFF217MHW	N/A
ChIP-seq	tim-reddy:H3K9me3.t6	ENCSR032SCO	GSE91194	tim-reddy:H3K9me3.t6_rep2_chip_seq_bigWig	ENCFF667UXK	N/A
ChIP-seq	tim-reddy:H3K9me3.t6	ENCSR032SCO	GSE91194	tim-reddy:H3K9me3.t6_rep2_chip_seq_broadPeak	ENCFF954KLT	N/A
ChIP-seq	tim-reddy:H3K9me3.t6	ENCSR032SCO	GSE91194	tim-reddy:H3K9me3.t6_rep2_chip_seq_fastq	ENCFF379VLY	SRR5093258
ChIP-seq	tim-reddy:H3K9me3.t6	ENCSR032SCO	GSE91194	tim-reddy:H3K9me3.t6_rep3_chip_seq_bam	ENCFF851CJF	N/A
ChIP-seq	tim-reddy:H3K9me3.t6	ENCSR032SCO	GSE91194	tim-reddy:H3K9me3.t6_rep3_chip_seq_bigWig	ENCFF568FGU	N/A
ChIP-seq	tim-reddy:H3K9me3.t6	ENCSR032SCO	GSE91194	tim-reddy:H3K9me3.t6_rep3_chip_seq_broadPeak	ENCFF907VHD	N/A
ChIP-seq	tim-reddy:H3K9me3.t6	ENCSR032SCO	GSE91194	tim-reddy:H3K9me3.t6_rep3_chip_seq_fastq	ENCFF060NVG	SRR5093257
ChIP-seq	tim-reddy:H3K9me3.t7	ENCSR873VJA	GSE91348	tim-reddy:H3K9me3.t7_rep1_chip_seq_bam	ENCFF225CDW	N/A
ChIP-seq	tim-reddy:H3K9me3.t7	ENCSR873VJA	GSE91348	tim-reddy:H3K9me3.t7_rep1_chip_seq_bigWig	ENCFF423BIN	N/A
ChIP-seq	tim-reddy:H3K9me3.t7	ENCSR873VJA	GSE91348	tim-reddy:H3K9me3.t7_rep1_chip_seq_broadPeak	ENCFF818VFT	N/A
ChIP-seq	tim-reddy:H3K9me3.t7	ENCSR873VJA	GSE91348	tim-reddy:H3K9me3.t7_rep1_chip_seq_fastq	ENCFF815MNI	SRR5093161
ChIP-seq	tim-reddy:H3K9me3.t7	ENCSR873VJA	GSE91348	tim-reddy:H3K9me3.t7_rep2_chip_seq_bam	ENCFF743TUY	N/A
ChIP-seq	tim-reddy:H3K9me3.t7	ENCSR873VJA	GSE91348	tim-reddy:H3K9me3.t7_rep2_chip_seq_bigWig	ENCFF430FJS	N/A
ChIP-seq	tim-reddy:H3K9me3.t7	ENCSR873VJA	GSE91348	tim-reddy:H3K9me3.t7_rep2_chip_seq_broadPeak	ENCFF168NBP	N/A
ChIP-seq	tim-reddy:H3K9me3.t7	ENCSR873VJA	GSE91348	tim-reddy:H3K9me3.t7_rep2_chip_seq_fastq	ENCFF355OCM	SRR5093163
ChIP-seq	tim-reddy:H3K9me3.t7	ENCSR873VJA	GSE91348	tim-reddy:H3K9me3.t7_rep3_chip_seq_bam	ENCFF005YFR	N/A
ChIP-seq	tim-reddy:H3K9me3.t7	ENCSR873VJA	GSE91348	tim-reddy:H3K9me3.t7_rep3_chip_seq_bigWig	ENCFF472GVA	N/A
ChIP-seq	tim-reddy:H3K9me3.t7	ENCSR873VJA	GSE91348	tim-reddy:H3K9me3.t7_rep3_chip_seq_broadPeak	ENCFF929RGW	N/A
ChIP-seq	tim-reddy:H3K9me3.t7	ENCSR873VJA	GSE91348	tim-reddy:H3K9me3.t7_rep3_chip_seq_fastq	ENCFF181WWU	SRR5093162
ChIP-seq	tim-reddy:H3K9me3.t8	ENCSR791BNU	GSE91338	tim-reddy:H3K9me3.t8_rep1_chip_seq_bam	ENCFF013MSU	N/A
ChIP-seq	tim-reddy:H3K9me3.t8	ENCSR791BNU	GSE91338	tim-reddy:H3K9me3.t8_rep1_chip_seq_bigWig	ENCFF248EAL	N/A
ChIP-seq	tim-reddy:H3K9me3.t8	ENCSR791BNU	GSE91338	tim-reddy:H3K9me3.t8_rep1_chip_seq_broadPeak	ENCFF704FHL	N/A
ChIP-seq	tim-reddy:H3K9me3.t8	ENCSR791BNU	GSE91338	tim-reddy:H3K9me3.t8_rep1_chip_seq_fastq	ENCFF612JBG	SRR5093133
ChIP-seq	tim-reddy:H3K9me3.t8	ENCSR791BNU	GSE91338	tim-reddy:H3K9me3.t8_rep2_chip_seq_bam	ENCFF224VBK	N/A
ChIP-seq	tim-reddy:H3K9me3.t8	ENCSR791BNU	GSE91338	tim-reddy:H3K9me3.t8_rep2_chip_seq_bigWig	ENCFF292OEQ	N/A
ChIP-seq	tim-reddy:H3K9me3.t8	ENCSR791BNU	GSE91338	tim-reddy:H3K9me3.t8_rep2_chip_seq_broadPeak	ENCFF136MAT	N/A
ChIP-seq	tim-reddy:H3K9me3.t8	ENCSR791BNU	GSE91338	tim-reddy:H3K9me3.t8_rep2_chip_seq_fastq	ENCFF279YEV	SRR5093132
ChIP-seq	tim-reddy:H3K9me3.t8	ENCSR791BNU	GSE91338	tim-reddy:H3K9me3.t8_rep3_chip_seq_bam	ENCFF963YSO	N/A
ChIP-seq	tim-reddy:H3K9me3.t8	ENCSR791BNU	GSE91338	tim-reddy:H3K9me3.t8_rep3_chip_seq_bigWig	ENCFF470YNF	N/A
ChIP-seq	tim-reddy:H3K9me3.t8	ENCSR791BNU	GSE91338	tim-reddy:H3K9me3.t8_rep3_chip_seq_broadPeak	ENCFF083AAD	N/A
ChIP-seq	tim-reddy:H3K9me3.t8	ENCSR791BNU	GSE91338	tim-reddy:H3K9me3.t8_rep3_chip_seq_fastq	ENCFF095UGZ	SRR5093134
ChIP-seq	tim-reddy:HES2.t00	ENCSR979IOT	GSE91369	tim-reddy:HES2.t00_rep1_chip_seq_bam	ENCFF544AYT	N/A
ChIP-seq	tim-reddy:HES2.t00	ENCSR979IOT	GSE91369	tim-reddy:HES2.t00_rep1_chip_seq_bigWig	ENCFF279QNS	N/A
ChIP-seq	tim-reddy:HES2.t00	ENCSR979IOT	GSE91369	tim-reddy:HES2.t00_rep1_chip_seq_fastq	ENCFF757ISI	SRR5093221
ChIP-seq	tim-reddy:HES2.t00	ENCSR979IOT	GSE91369	tim-reddy:HES2.t00_rep1_chip_seq_narrowPeak	ENCFF558XCJ	N/A
ChIP-seq	tim-reddy:HES2.t00	ENCSR979IOT	GSE91369	tim-reddy:HES2.t00_rep2_chip_seq_bam	ENCFF322NBG	N/A
ChIP-seq	tim-reddy:HES2.t00	ENCSR979IOT	GSE91369	tim-reddy:HES2.t00_rep2_chip_seq_bigWig	ENCFF236ZPF	N/A
ChIP-seq	tim-reddy:HES2.t00	ENCSR979IOT	GSE91369	tim-reddy:HES2.t00_rep2_chip_seq_fastq	ENCFF397OKF	SRR5093220
ChIP-seq	tim-reddy:HES2.t00	ENCSR979IOT	GSE91369	tim-reddy:HES2.t00_rep2_chip_seq_narrowPeak	ENCFF164ABR	N/A
ChIP-seq	tim-reddy:HES2.t05	ENCSR356YXW	GSE91250	tim-reddy:HES2.t05_rep1_chip_seq_bam	ENCFF878QJJ	N/A
ChIP-seq	tim-reddy:HES2.t05	ENCSR356YXW	GSE91250	tim-reddy:HES2.t05_rep1_chip_seq_bigWig	ENCFF027FYT	N/A
ChIP-seq	tim-reddy:HES2.t05	ENCSR356YXW	GSE91250	tim-reddy:HES2.t05_rep1_chip_seq_fastq	ENCFF585KHC	SRR5093430
ChIP-seq	tim-reddy:HES2.t05	ENCSR356YXW	GSE91250	tim-reddy:HES2.t05_rep1_chip_seq_narrowPeak	ENCFF082ILA	N/A
ChIP-seq	tim-reddy:HES2.t05	ENCSR356YXW	GSE91250	tim-reddy:HES2.t05_rep2_chip_seq_bam	ENCFF385POH	N/A
ChIP-seq	tim-reddy:HES2.t05	ENCSR356YXW	GSE91250	tim-reddy:HES2.t05_rep2_chip_seq_bigWig	ENCFF976JPR	N/A
ChIP-seq	tim-reddy:HES2.t05	ENCSR356YXW	GSE91250	tim-reddy:HES2.t05_rep2_chip_seq_fastq	ENCFF409ZVI	SRR5093431
ChIP-seq	tim-reddy:HES2.t05	ENCSR356YXW	GSE91250	tim-reddy:HES2.t05_rep2_chip_seq_narrowPeak	ENCFF026ITM	N/A
ChIP-seq	tim-reddy:HES2.t05	ENCSR356YXW	GSE91250	tim-reddy:HES2.t05_rep3_chip_seq_bam	ENCFF531WEL	N/A
ChIP-seq	tim-reddy:HES2.t05	ENCSR356YXW	GSE91250	tim-reddy:HES2.t05_rep3_chip_seq_bigWig	ENCFF465CMT	N/A
ChIP-seq	tim-reddy:HES2.t05	ENCSR356YXW	GSE91250	tim-reddy:HES2.t05_rep3_chip_seq_fastq	ENCFF739PFA	SRR5093429
ChIP-seq	tim-reddy:HES2.t05	ENCSR356YXW	GSE91250	tim-reddy:HES2.t05_rep3_chip_seq_narrowPeak	ENCFF866XCO	N/A
ChIP-seq	tim-reddy:HES2.t10	ENCSR686BIE	GSE91316	tim-reddy:HES2.t10_rep1_chip_seq_bam	ENCFF205FAF	N/A
ChIP-seq	tim-reddy:HES2.t10	ENCSR686BIE	GSE91316	tim-reddy:HES2.t10_rep1_chip_seq_bigWig	ENCFF948SBP	N/A
ChIP-seq	tim-reddy:HES2.t10	ENCSR686BIE	GSE91316	tim-reddy:HES2.t10_rep1_chip_seq_fastq	ENCFF814TUX	SRR5093069
ChIP-seq	tim-reddy:HES2.t10	ENCSR686BIE	GSE91316	tim-reddy:HES2.t10_rep1_chip_seq_narrowPeak	ENCFF809ECU	N/A
ChIP-seq	tim-reddy:HES2.t10	ENCSR686BIE	GSE91316	tim-reddy:HES2.t10_rep2_chip_seq_bam	ENCFF109QWN	N/A
ChIP-seq	tim-reddy:HES2.t10	ENCSR686BIE	GSE91316	tim-reddy:HES2.t10_rep2_chip_seq_bigWig	ENCFF003VVT	N/A
ChIP-seq	tim-reddy:HES2.t10	ENCSR686BIE	GSE91316	tim-reddy:HES2.t10_rep2_chip_seq_fastq	ENCFF683XIO	SRR5093070
ChIP-seq	tim-reddy:HES2.t10	ENCSR686BIE	GSE91316	tim-reddy:HES2.t10_rep2_chip_seq_narrowPeak	ENCFF862NNV	N/A
ChIP-seq	tim-reddy:HES2.t10	ENCSR686BIE	GSE91316	tim-reddy:HES2.t10_rep3_chip_seq_bam	ENCFF901QVW	N/A
ChIP-seq	tim-reddy:HES2.t10	ENCSR686BIE	GSE91316	tim-reddy:HES2.t10_rep3_chip_seq_bigWig	ENCFF980TWF	N/A
ChIP-seq	tim-reddy:HES2.t10	ENCSR686BIE	GSE91316	tim-reddy:HES2.t10_rep3_chip_seq_fastq	ENCFF555QDL	SRR5093071
ChIP-seq	tim-reddy:HES2.t10	ENCSR686BIE	GSE91316	tim-reddy:HES2.t10_rep3_chip_seq_narrowPeak	ENCFF930CUH	N/A
ChIP-seq	tim-reddy:HES2.t12	ENCSR951SNW	GSE91364	tim-reddy:HES2.t12_rep1_chip_seq_bam	ENCFF424ZCM	N/A
ChIP-seq	tim-reddy:HES2.t12	ENCSR951SNW	GSE91364	tim-reddy:HES2.t12_rep1_chip_seq_bigWig	ENCFF318SYS	N/A
ChIP-seq	tim-reddy:HES2.t12	ENCSR951SNW	GSE91364	tim-reddy:HES2.t12_rep1_chip_seq_fastq	ENCFF096RKY	SRR5093237
ChIP-seq	tim-reddy:HES2.t12	ENCSR951SNW	GSE91364	tim-reddy:HES2.t12_rep1_chip_seq_narrowPeak	ENCFF166AZX	N/A
ChIP-seq	tim-reddy:HES2.t12	ENCSR951SNW	GSE91364	tim-reddy:HES2.t12_rep2_chip_seq_bam	ENCFF786JYF	N/A
ChIP-seq	tim-reddy:HES2.t12	ENCSR951SNW	GSE91364	tim-reddy:HES2.t12_rep2_chip_seq_bigWig	ENCFF969CYF	N/A
ChIP-seq	tim-reddy:HES2.t12	ENCSR951SNW	GSE91364	tim-reddy:HES2.t12_rep2_chip_seq_fastq	ENCFF296DQB	SRR5093238
ChIP-seq	tim-reddy:HES2.t12	ENCSR951SNW	GSE91364	tim-reddy:HES2.t12_rep2_chip_seq_narrowPeak	ENCFF092DMV	N/A
ChIP-seq	tim-reddy:HES2.t12	ENCSR951SNW	GSE91364	tim-reddy:HES2.t12_rep3_chip_seq_bam	ENCFF091ZVF	N/A
ChIP-seq	tim-reddy:HES2.t12	ENCSR951SNW	GSE91364	tim-reddy:HES2.t12_rep3_chip_seq_bigWig	ENCFF510GGC	N/A
ChIP-seq	tim-reddy:HES2.t12	ENCSR951SNW	GSE91364	tim-reddy:HES2.t12_rep3_chip_seq_fastq	ENCFF319WMV	SRR5093236
ChIP-seq	tim-reddy:HES2.t12	ENCSR951SNW	GSE91364	tim-reddy:HES2.t12_rep3_chip_seq_narrowPeak	ENCFF997LAV	N/A
ChIP-seq	tim-reddy:HES2.t1	ENCSR796VBR	GSE91340	tim-reddy:HES2.t1_rep1_chip_seq_bam	ENCFF473OST	N/A
ChIP-seq	tim-reddy:HES2.t1	ENCSR796VBR	GSE91340	tim-reddy:HES2.t1_rep1_chip_seq_bigWig	ENCFF062XUZ	N/A
ChIP-seq	tim-reddy:HES2.t1	ENCSR796VBR	GSE91340	tim-reddy:HES2.t1_rep1_chip_seq_fastq	ENCFF319RWJ	SRR5093146
ChIP-seq	tim-reddy:HES2.t1	ENCSR796VBR	GSE91340	tim-reddy:HES2.t1_rep1_chip_seq_narrowPeak	ENCFF103DRH	N/A
ChIP-seq	tim-reddy:HES2.t1	ENCSR796VBR	GSE91340	tim-reddy:HES2.t1_rep2_chip_seq_bam	ENCFF211RJJ	N/A
ChIP-seq	tim-reddy:HES2.t1	ENCSR796VBR	GSE91340	tim-reddy:HES2.t1_rep2_chip_seq_bigWig	ENCFF907BJN	N/A
ChIP-seq	tim-reddy:HES2.t1	ENCSR796VBR	GSE91340	tim-reddy:HES2.t1_rep2_chip_seq_fastq	ENCFF622DKG	SRR5093148
ChIP-seq	tim-reddy:HES2.t1	ENCSR796VBR	GSE91340	tim-reddy:HES2.t1_rep2_chip_seq_narrowPeak	ENCFF830HRG	N/A
ChIP-seq	tim-reddy:HES2.t1	ENCSR796VBR	GSE91340	tim-reddy:HES2.t1_rep3_chip_seq_bam	ENCFF261HAG	N/A
ChIP-seq	tim-reddy:HES2.t1	ENCSR796VBR	GSE91340	tim-reddy:HES2.t1_rep3_chip_seq_bigWig	ENCFF635OXO	N/A
ChIP-seq	tim-reddy:HES2.t1	ENCSR796VBR	GSE91340	tim-reddy:HES2.t1_rep3_chip_seq_fastq	ENCFF674JZV	SRR5093147
ChIP-seq	tim-reddy:HES2.t1	ENCSR796VBR	GSE91340	tim-reddy:HES2.t1_rep3_chip_seq_narrowPeak	ENCFF725JAX	N/A
ChIP-seq	tim-reddy:HES2.t2	ENCSR419TWL	GSE91259	tim-reddy:HES2.t2_rep1_chip_seq_bam	ENCFF504YVD	N/A
ChIP-seq	tim-reddy:HES2.t2	ENCSR419TWL	GSE91259	tim-reddy:HES2.t2_rep1_chip_seq_bigWig	ENCFF346ZOQ	N/A
ChIP-seq	tim-reddy:HES2.t2	ENCSR419TWL	GSE91259	tim-reddy:HES2.t2_rep1_chip_seq_fastq	ENCFF903DHQ	SRR5093464
ChIP-seq	tim-reddy:HES2.t2	ENCSR419TWL	GSE91259	tim-reddy:HES2.t2_rep1_chip_seq_narrowPeak	ENCFF796DJR	N/A
ChIP-seq	tim-reddy:HES2.t2	ENCSR419TWL	GSE91259	tim-reddy:HES2.t2_rep2_chip_seq_bam	ENCFF595EIS	N/A
ChIP-seq	tim-reddy:HES2.t2	ENCSR419TWL	GSE91259	tim-reddy:HES2.t2_rep2_chip_seq_bigWig	ENCFF508DLU	N/A
ChIP-seq	tim-reddy:HES2.t2	ENCSR419TWL	GSE91259	tim-reddy:HES2.t2_rep2_chip_seq_fastq	ENCFF883UDI	SRR5093465
ChIP-seq	tim-reddy:HES2.t2	ENCSR419TWL	GSE91259	tim-reddy:HES2.t2_rep2_chip_seq_narrowPeak	ENCFF839RGK	N/A
ChIP-seq	tim-reddy:HES2.t3	ENCSR690HWX	GSE91320	tim-reddy:HES2.t3_rep1_chip_seq_bam	ENCFF418CAP	N/A
ChIP-seq	tim-reddy:HES2.t3	ENCSR690HWX	GSE91320	tim-reddy:HES2.t3_rep1_chip_seq_bigWig	ENCFF025JHC	N/A
ChIP-seq	tim-reddy:HES2.t3	ENCSR690HWX	GSE91320	tim-reddy:HES2.t3_rep1_chip_seq_fastq	ENCFF835MTD	SRR5093081
ChIP-seq	tim-reddy:HES2.t3	ENCSR690HWX	GSE91320	tim-reddy:HES2.t3_rep1_chip_seq_narrowPeak	ENCFF992HOC	N/A
ChIP-seq	tim-reddy:HES2.t3	ENCSR690HWX	GSE91320	tim-reddy:HES2.t3_rep2_chip_seq_bam	ENCFF118MNA	N/A
ChIP-seq	tim-reddy:HES2.t3	ENCSR690HWX	GSE91320	tim-reddy:HES2.t3_rep2_chip_seq_bigWig	ENCFF554BPG	N/A
ChIP-seq	tim-reddy:HES2.t3	ENCSR690HWX	GSE91320	tim-reddy:HES2.t3_rep2_chip_seq_fastq	ENCFF738STD	SRR5093080
ChIP-seq	tim-reddy:HES2.t3	ENCSR690HWX	GSE91320	tim-reddy:HES2.t3_rep2_chip_seq_narrowPeak	ENCFF012WGN	N/A
ChIP-seq	tim-reddy:HES2.t4	ENCSR078POK	GSE91200	tim-reddy:HES2.t4_rep1_chip_seq_bam	ENCFF230TUM	N/A
ChIP-seq	tim-reddy:HES2.t4	ENCSR078POK	GSE91200	tim-reddy:HES2.t4_rep1_chip_seq_bigWig	ENCFF546GKL	N/A
ChIP-seq	tim-reddy:HES2.t4	ENCSR078POK	GSE91200	tim-reddy:HES2.t4_rep1_chip_seq_fastq	ENCFF280YQX	SRR5093279
ChIP-seq	tim-reddy:HES2.t4	ENCSR078POK	GSE91200	tim-reddy:HES2.t4_rep1_chip_seq_narrowPeak	ENCFF438HEY	N/A
ChIP-seq	tim-reddy:HES2.t4	ENCSR078POK	GSE91200	tim-reddy:HES2.t4_rep2_chip_seq_bam	ENCFF328JGI	N/A
ChIP-seq	tim-reddy:HES2.t4	ENCSR078POK	GSE91200	tim-reddy:HES2.t4_rep2_chip_seq_bigWig	ENCFF396YNU	N/A
ChIP-seq	tim-reddy:HES2.t4	ENCSR078POK	GSE91200	tim-reddy:HES2.t4_rep2_chip_seq_fastq	ENCFF492PAI	SRR5093280
ChIP-seq	tim-reddy:HES2.t4	ENCSR078POK	GSE91200	tim-reddy:HES2.t4_rep2_chip_seq_narrowPeak	ENCFF112GXG	N/A
ChIP-seq	tim-reddy:HES2.t5	ENCSR964KSS	GSE91368	tim-reddy:HES2.t5_rep1_chip_seq_bam	ENCFF108OOG	N/A
ChIP-seq	tim-reddy:HES2.t5	ENCSR964KSS	GSE91368	tim-reddy:HES2.t5_rep1_chip_seq_bigWig	ENCFF369VNS	N/A
ChIP-seq	tim-reddy:HES2.t5	ENCSR964KSS	GSE91368	tim-reddy:HES2.t5_rep1_chip_seq_fastq	ENCFF733MTL	SRR5093219
ChIP-seq	tim-reddy:HES2.t5	ENCSR964KSS	GSE91368	tim-reddy:HES2.t5_rep1_chip_seq_narrowPeak	ENCFF262UHD	N/A
ChIP-seq	tim-reddy:HES2.t5	ENCSR964KSS	GSE91368	tim-reddy:HES2.t5_rep2_chip_seq_bam	ENCFF440EJY	N/A
ChIP-seq	tim-reddy:HES2.t5	ENCSR964KSS	GSE91368	tim-reddy:HES2.t5_rep2_chip_seq_bigWig	ENCFF822PTJ	N/A
ChIP-seq	tim-reddy:HES2.t5	ENCSR964KSS	GSE91368	tim-reddy:HES2.t5_rep2_chip_seq_fastq	ENCFF258DUQ	SRR5093218
ChIP-seq	tim-reddy:HES2.t5	ENCSR964KSS	GSE91368	tim-reddy:HES2.t5_rep2_chip_seq_narrowPeak	ENCFF183FJD	N/A
ChIP-seq	tim-reddy:HES2.t5	ENCSR964KSS	GSE91368	tim-reddy:HES2.t5_rep3_chip_seq_bam	ENCFF143FOX	N/A
ChIP-seq	tim-reddy:HES2.t5	ENCSR964KSS	GSE91368	tim-reddy:HES2.t5_rep3_chip_seq_bigWig	ENCFF162HRC	N/A
ChIP-seq	tim-reddy:HES2.t5	ENCSR964KSS	GSE91368	tim-reddy:HES2.t5_rep3_chip_seq_fastq	ENCFF437LHQ	SRR5093217
ChIP-seq	tim-reddy:HES2.t5	ENCSR964KSS	GSE91368	tim-reddy:HES2.t5_rep3_chip_seq_narrowPeak	ENCFF585NZZ	N/A
ChIP-seq	tim-reddy:HES2.t6	ENCSR425MXK	GSE91261	tim-reddy:HES2.t6_rep1_chip_seq_bam	ENCFF796APY	N/A
ChIP-seq	tim-reddy:HES2.t6	ENCSR425MXK	GSE91261	tim-reddy:HES2.t6_rep1_chip_seq_bigWig	ENCFF825VPP	N/A
ChIP-seq	tim-reddy:HES2.t6	ENCSR425MXK	GSE91261	tim-reddy:HES2.t6_rep1_chip_seq_fastq	ENCFF658OUW	SRR5093470
ChIP-seq	tim-reddy:HES2.t6	ENCSR425MXK	GSE91261	tim-reddy:HES2.t6_rep1_chip_seq_narrowPeak	ENCFF749OUC	N/A
ChIP-seq	tim-reddy:HES2.t6	ENCSR425MXK	GSE91261	tim-reddy:HES2.t6_rep2_chip_seq_bam	ENCFF007EXO	N/A
ChIP-seq	tim-reddy:HES2.t6	ENCSR425MXK	GSE91261	tim-reddy:HES2.t6_rep2_chip_seq_bigWig	ENCFF732XBJ	N/A
ChIP-seq	tim-reddy:HES2.t6	ENCSR425MXK	GSE91261	tim-reddy:HES2.t6_rep2_chip_seq_fastq	ENCFF626GGL	SRR5093469
ChIP-seq	tim-reddy:HES2.t6	ENCSR425MXK	GSE91261	tim-reddy:HES2.t6_rep2_chip_seq_narrowPeak	ENCFF459EFI	N/A
ChIP-seq	tim-reddy:HES2.t6	ENCSR425MXK	GSE91261	tim-reddy:HES2.t6_rep3_chip_seq_bam	ENCFF514RAQ	N/A
ChIP-seq	tim-reddy:HES2.t6	ENCSR425MXK	GSE91261	tim-reddy:HES2.t6_rep3_chip_seq_bigWig	ENCFF038NYI	N/A
ChIP-seq	tim-reddy:HES2.t6	ENCSR425MXK	GSE91261	tim-reddy:HES2.t6_rep3_chip_seq_fastq	ENCFF685EMQ	SRR5093471
ChIP-seq	tim-reddy:HES2.t6	ENCSR425MXK	GSE91261	tim-reddy:HES2.t6_rep3_chip_seq_narrowPeak	ENCFF822TXJ	N/A
ChIP-seq	tim-reddy:HES2.t7	ENCSR911KBJ	GSE91355	tim-reddy:HES2.t7_rep1_chip_seq_bam	ENCFF744YDA	N/A
ChIP-seq	tim-reddy:HES2.t7	ENCSR911KBJ	GSE91355	tim-reddy:HES2.t7_rep1_chip_seq_bigWig	ENCFF827XRE	N/A
ChIP-seq	tim-reddy:HES2.t7	ENCSR911KBJ	GSE91355	tim-reddy:HES2.t7_rep1_chip_seq_fastq	ENCFF440ZPY	SRR5093183
ChIP-seq	tim-reddy:HES2.t7	ENCSR911KBJ	GSE91355	tim-reddy:HES2.t7_rep1_chip_seq_narrowPeak	ENCFF326KDJ	N/A
ChIP-seq	tim-reddy:HES2.t7	ENCSR911KBJ	GSE91355	tim-reddy:HES2.t7_rep2_chip_seq_bam	ENCFF634DLN	N/A
ChIP-seq	tim-reddy:HES2.t7	ENCSR911KBJ	GSE91355	tim-reddy:HES2.t7_rep2_chip_seq_bigWig	ENCFF717IEU	N/A
ChIP-seq	tim-reddy:HES2.t7	ENCSR911KBJ	GSE91355	tim-reddy:HES2.t7_rep2_chip_seq_fastq	ENCFF241HXA	SRR5093181
ChIP-seq	tim-reddy:HES2.t7	ENCSR911KBJ	GSE91355	tim-reddy:HES2.t7_rep2_chip_seq_narrowPeak	ENCFF177CFG	N/A
ChIP-seq	tim-reddy:HES2.t7	ENCSR911KBJ	GSE91355	tim-reddy:HES2.t7_rep3_chip_seq_bam	ENCFF924ZJR	N/A
ChIP-seq	tim-reddy:HES2.t7	ENCSR911KBJ	GSE91355	tim-reddy:HES2.t7_rep3_chip_seq_bigWig	ENCFF915CSK	N/A
ChIP-seq	tim-reddy:HES2.t7	ENCSR911KBJ	GSE91355	tim-reddy:HES2.t7_rep3_chip_seq_fastq	ENCFF817VDV	SRR5093182
ChIP-seq	tim-reddy:HES2.t7	ENCSR911KBJ	GSE91355	tim-reddy:HES2.t7_rep3_chip_seq_narrowPeak	ENCFF990UKT	N/A
ChIP-seq	tim-reddy:HES2.t8	ENCSR646EFO	GSE91308	tim-reddy:HES2.t8_rep1_chip_seq_bam	ENCFF323OGO	N/A
ChIP-seq	tim-reddy:HES2.t8	ENCSR646EFO	GSE91308	tim-reddy:HES2.t8_rep1_chip_seq_bigWig	ENCFF238CKD	N/A
ChIP-seq	tim-reddy:HES2.t8	ENCSR646EFO	GSE91308	tim-reddy:HES2.t8_rep1_chip_seq_fastq	ENCFF456CFD	SRR5093048
ChIP-seq	tim-reddy:HES2.t8	ENCSR646EFO	GSE91308	tim-reddy:HES2.t8_rep1_chip_seq_narrowPeak	ENCFF298JHS	N/A
ChIP-seq	tim-reddy:HES2.t8	ENCSR646EFO	GSE91308	tim-reddy:HES2.t8_rep2_chip_seq_bam	ENCFF403WTU	N/A
ChIP-seq	tim-reddy:HES2.t8	ENCSR646EFO	GSE91308	tim-reddy:HES2.t8_rep2_chip_seq_bigWig	ENCFF388ABR	N/A
ChIP-seq	tim-reddy:HES2.t8	ENCSR646EFO	GSE91308	tim-reddy:HES2.t8_rep2_chip_seq_fastq	ENCFF830ODO	SRR5093047
ChIP-seq	tim-reddy:HES2.t8	ENCSR646EFO	GSE91308	tim-reddy:HES2.t8_rep2_chip_seq_narrowPeak	ENCFF237NXV	N/A
ChIP-seq	tim-reddy:HES2.t8	ENCSR646EFO	GSE91308	tim-reddy:HES2.t8_rep3_chip_seq_bam	ENCFF635WST	N/A
ChIP-seq	tim-reddy:HES2.t8	ENCSR646EFO	GSE91308	tim-reddy:HES2.t8_rep3_chip_seq_bigWig	ENCFF691JPY	N/A
ChIP-seq	tim-reddy:HES2.t8	ENCSR646EFO	GSE91308	tim-reddy:HES2.t8_rep3_chip_seq_fastq	ENCFF678OJQ	SRR5093046
ChIP-seq	tim-reddy:HES2.t8	ENCSR646EFO	GSE91308	tim-reddy:HES2.t8_rep3_chip_seq_narrowPeak	ENCFF170WIB	N/A
ChIP-seq	tim-reddy:JunB.t00	ENCSR431LRW	GSE92807	tim-reddy:JunB.t00_rep2_chip_seq_bam	ENCFF599JTK	N/A
ChIP-seq	tim-reddy:JunB.t00	ENCSR431LRW	GSE92807	tim-reddy:JunB.t00_rep2_chip_seq_bigWig	ENCFF854HWX	N/A
ChIP-seq	tim-reddy:JunB.t00	ENCSR431LRW	GSE92807	tim-reddy:JunB.t00_rep2_chip_seq_fastq	ENCFF886IUE	SRR5129698
ChIP-seq	tim-reddy:JunB.t00	ENCSR431LRW	GSE92807	tim-reddy:JunB.t00_rep2_chip_seq_narrowPeak	ENCFF683JTQ	N/A
ChIP-seq	tim-reddy:JunB.t00	ENCSR431LRW	GSE92807	tim-reddy:JunB.t00_rep3_chip_seq_bam	ENCFF389OFH	N/A
ChIP-seq	tim-reddy:JunB.t00	ENCSR431LRW	GSE92807	tim-reddy:JunB.t00_rep3_chip_seq_bigWig	ENCFF477DOE	N/A
ChIP-seq	tim-reddy:JunB.t00	ENCSR431LRW	GSE92807	tim-reddy:JunB.t00_rep3_chip_seq_fastq	ENCFF933IQW	SRR5129697
ChIP-seq	tim-reddy:JunB.t00	ENCSR431LRW	GSE92807	tim-reddy:JunB.t00_rep3_chip_seq_narrowPeak	ENCFF565QYS	N/A
ChIP-seq	tim-reddy:JunB.t05	ENCSR523BPZ	GSE92813	tim-reddy:JunB.t05_rep2_chip_seq_bam	ENCFF110DLJ	N/A
ChIP-seq	tim-reddy:JunB.t05	ENCSR523BPZ	GSE92813	tim-reddy:JunB.t05_rep2_chip_seq_bigWig	ENCFF837WJB	N/A
ChIP-seq	tim-reddy:JunB.t05	ENCSR523BPZ	GSE92813	tim-reddy:JunB.t05_rep2_chip_seq_fastq	ENCFF879INX	SRR5129607
ChIP-seq	tim-reddy:JunB.t05	ENCSR523BPZ	GSE92813	tim-reddy:JunB.t05_rep2_chip_seq_narrowPeak	ENCFF799KKU	N/A
ChIP-seq	tim-reddy:JunB.t05	ENCSR523BPZ	GSE92813	tim-reddy:JunB.t05_rep3_chip_seq_bam	ENCFF616IPB	N/A
ChIP-seq	tim-reddy:JunB.t05	ENCSR523BPZ	GSE92813	tim-reddy:JunB.t05_rep3_chip_seq_bigWig	ENCFF948MNB	N/A
ChIP-seq	tim-reddy:JunB.t05	ENCSR523BPZ	GSE92813	tim-reddy:JunB.t05_rep3_chip_seq_fastq	ENCFF627BZC	SRR5129608
ChIP-seq	tim-reddy:JunB.t05	ENCSR523BPZ	GSE92813	tim-reddy:JunB.t05_rep3_chip_seq_narrowPeak	ENCFF362SMA	N/A
ChIP-seq	tim-reddy:JunB.t10	ENCSR226UQG	GSE92791	tim-reddy:JunB.t10_rep1_chip_seq_bam	ENCFF145FCK	N/A
ChIP-seq	tim-reddy:JunB.t10	ENCSR226UQG	GSE92791	tim-reddy:JunB.t10_rep1_chip_seq_bigWig	ENCFF631BOV	N/A
ChIP-seq	tim-reddy:JunB.t10	ENCSR226UQG	GSE92791	tim-reddy:JunB.t10_rep1_chip_seq_fastq	ENCFF820SNN	SRR5129571
ChIP-seq	tim-reddy:JunB.t10	ENCSR226UQG	GSE92791	tim-reddy:JunB.t10_rep2_chip_seq_bam	ENCFF571KYD	N/A
ChIP-seq	tim-reddy:JunB.t10	ENCSR226UQG	GSE92791	tim-reddy:JunB.t10_rep2_chip_seq_bigWig	ENCFF118BDH	N/A
ChIP-seq	tim-reddy:JunB.t10	ENCSR226UQG	GSE92791	tim-reddy:JunB.t10_rep2_chip_seq_fastq	ENCFF280XMA	SRR5129572
ChIP-seq	tim-reddy:JunB.t10	ENCSR226UQG	GSE92791	tim-reddy:JunB.t10_rep2_chip_seq_narrowPeak	ENCFF256HHF	N/A
ChIP-seq	tim-reddy:JunB.t10	ENCSR226UQG	GSE92791	tim-reddy:JunB.t10_rep3_chip_seq_bam	ENCFF859KSE	N/A
ChIP-seq	tim-reddy:JunB.t10	ENCSR226UQG	GSE92791	tim-reddy:JunB.t10_rep3_chip_seq_bigWig	ENCFF851JCC	N/A
ChIP-seq	tim-reddy:JunB.t10	ENCSR226UQG	GSE92791	tim-reddy:JunB.t10_rep3_chip_seq_fastq	ENCFF552KQQ	SRR5129573
ChIP-seq	tim-reddy:JunB.t10	ENCSR226UQG	GSE92791	tim-reddy:JunB.t10_rep3_chip_seq_narrowPeak	ENCFF207IGN	N/A
ChIP-seq	tim-reddy:JunB.t12	ENCSR332WDQ	GSE92799	tim-reddy:JunB.t12_rep1_chip_seq_bam	ENCFF807GKK	N/A
ChIP-seq	tim-reddy:JunB.t12	ENCSR332WDQ	GSE92799	tim-reddy:JunB.t12_rep1_chip_seq_bigWig	ENCFF139GFE	N/A
ChIP-seq	tim-reddy:JunB.t12	ENCSR332WDQ	GSE92799	tim-reddy:JunB.t12_rep1_chip_seq_fastq	ENCFF108VEZ	SRR5129570
ChIP-seq	tim-reddy:JunB.t12	ENCSR332WDQ	GSE92799	tim-reddy:JunB.t12_rep1_chip_seq_narrowPeak	ENCFF512QLI	N/A
ChIP-seq	tim-reddy:JunB.t12	ENCSR332WDQ	GSE92799	tim-reddy:JunB.t12_rep2_chip_seq_bam	ENCFF625YHJ	N/A
ChIP-seq	tim-reddy:JunB.t12	ENCSR332WDQ	GSE92799	tim-reddy:JunB.t12_rep2_chip_seq_bigWig	ENCFF649QBD	N/A
ChIP-seq	tim-reddy:JunB.t12	ENCSR332WDQ	GSE92799	tim-reddy:JunB.t12_rep2_chip_seq_fastq	ENCFF601RDD	SRR5129569
ChIP-seq	tim-reddy:JunB.t12	ENCSR332WDQ	GSE92799	tim-reddy:JunB.t12_rep2_chip_seq_narrowPeak	ENCFF381ZAP	N/A
ChIP-seq	tim-reddy:JunB.t1	ENCSR490YTY	GSE92810	tim-reddy:JunB.t1_rep2_chip_seq_bam	ENCFF720VQA	N/A
ChIP-seq	tim-reddy:JunB.t1	ENCSR490YTY	GSE92810	tim-reddy:JunB.t1_rep2_chip_seq_bigWig	ENCFF696UCJ	N/A
ChIP-seq	tim-reddy:JunB.t1	ENCSR490YTY	GSE92810	tim-reddy:JunB.t1_rep2_chip_seq_fastq	ENCFF221EQZ	SRR5129695
ChIP-seq	tim-reddy:JunB.t1	ENCSR490YTY	GSE92810	tim-reddy:JunB.t1_rep2_chip_seq_narrowPeak	ENCFF692MOZ	N/A
ChIP-seq	tim-reddy:JunB.t1	ENCSR490YTY	GSE92810	tim-reddy:JunB.t1_rep3_chip_seq_bam	ENCFF528TQB	N/A
ChIP-seq	tim-reddy:JunB.t1	ENCSR490YTY	GSE92810	tim-reddy:JunB.t1_rep3_chip_seq_bigWig	ENCFF481VOA	N/A
ChIP-seq	tim-reddy:JunB.t1	ENCSR490YTY	GSE92810	tim-reddy:JunB.t1_rep3_chip_seq_fastq	ENCFF008EQM	SRR5129696
ChIP-seq	tim-reddy:JunB.t1	ENCSR490YTY	GSE92810	tim-reddy:JunB.t1_rep3_chip_seq_narrowPeak	ENCFF031VMK	N/A
ChIP-seq	tim-reddy:JunB.t2	ENCSR269RPR	GSE92796	tim-reddy:JunB.t2_rep2_chip_seq_bam	ENCFF179XAQ	N/A
ChIP-seq	tim-reddy:JunB.t2	ENCSR269RPR	GSE92796	tim-reddy:JunB.t2_rep2_chip_seq_bigWig	ENCFF916ASP	N/A
ChIP-seq	tim-reddy:JunB.t2	ENCSR269RPR	GSE92796	tim-reddy:JunB.t2_rep2_chip_seq_fastq	ENCFF217SOO	SRR5129597
ChIP-seq	tim-reddy:JunB.t2	ENCSR269RPR	GSE92796	tim-reddy:JunB.t2_rep2_chip_seq_narrowPeak	ENCFF180WKU	N/A
ChIP-seq	tim-reddy:JunB.t2	ENCSR269RPR	GSE92796	tim-reddy:JunB.t2_rep3_chip_seq_bam	ENCFF330XFU	N/A
ChIP-seq	tim-reddy:JunB.t2	ENCSR269RPR	GSE92796	tim-reddy:JunB.t2_rep3_chip_seq_bigWig	ENCFF762LES	N/A
ChIP-seq	tim-reddy:JunB.t2	ENCSR269RPR	GSE92796	tim-reddy:JunB.t2_rep3_chip_seq_fastq	ENCFF684GNS	SRR5129598
ChIP-seq	tim-reddy:JunB.t2	ENCSR269RPR	GSE92796	tim-reddy:JunB.t2_rep3_chip_seq_narrowPeak	ENCFF724OHD	N/A
ChIP-seq	tim-reddy:JunB.t3	ENCSR871NPV	GSE92831	tim-reddy:JunB.t3_rep1_chip_seq_bam	ENCFF637ZRG	N/A
ChIP-seq	tim-reddy:JunB.t3	ENCSR871NPV	GSE92831	tim-reddy:JunB.t3_rep1_chip_seq_bigWig	ENCFF777ZZK	N/A
ChIP-seq	tim-reddy:JunB.t3	ENCSR871NPV	GSE92831	tim-reddy:JunB.t3_rep1_chip_seq_fastq	ENCFF665JQS	SRR5129688
[truncated: 545 more rows]
