# Supplementary material for: Glucocorticoid receptor recruits to enhancers and drives activation by motif-directed binding
Source: HighWire-hosted journal article supplement (doi:10.1101/gr.233346.117), 2018-08-10
Supplement: Supplemental_TableS4.xlsx [file Supplemental_TableS4.xlsx]

## Sheet: chip-seq
sample	reads sequenced	reads after trimming	reads mapped	% reads mapped	reads mapped after de-dup & filtering	%reads mapped after de-dup & filtering	reads in peaks	% reads in peaks	peaks	%reads unique	PBC	NSC	RSC
BCL3.t00_rep1	21405479	20891322	17731057	84.8728	17370967	83.1491	410933	2.3656	12967	0.9885	0.819429	1.02913	0.96382
BCL3.t00_rep2	20103280	19573982	16780954	85.7309	16480698	84.1969	341542	2.0723	10925	0.9893	0.823035	1.0343	1.09438
BCL3.t00_rep3	13386224	12982705	11473820	88.3777	11089127	85.4146	259050	2.336	7999	0.967	0.829462	1.05306	1.31606
BCL3.t05_rep1	21671225	21141775	17963410	84.9664	17571224	83.1113	372364	2.1191	11675	0.9877	0.80939	1.02929	1.00083
BCL3.t05_rep2	18573543	17987279	15700340	87.2857	15293750	85.0253	1116508	7.3004	20953	0.9821	0.812671	1.11313	1.35537
BCL3.t05_rep3	24371006	22884228	20264268	88.5512	19063732	83.3051	796634	4.1787	12215	0.9651	0.73563	1.06991	1.41117
BCL3.t1_rep1	18738084	18292481	16105790	88.0459	15523038	84.8602	566065	3.6466	14450	0.9773	0.807956	1.05727	1.31903
BCL3.t1_rep2	20697493	20055109	17440199	86.9613	17024553	84.8888	1763071	10.356	30012	0.9843	0.809173	1.1567	1.45781
BCL3.t1_rep3	19314057	18631241	16367543	87.8499	15989043	85.8184	14476	0.0905	298	0.986	0.81437	1.01462	0.901358
BCL3.t2_rep1	19297718	18872611	16288145	86.3057	15984819	84.6985	208673	1.3054	7179	0.9886	0.827515	1.02581	0.998233
BCL3.t2_rep2	19170704	18588532	16152595	86.8954	15831855	85.17	995067	6.2852	21473	0.9868	0.820002	1.09039	1.3552
BCL3.t2_rep3	17372124	16641815	14787743	88.8589	13541232	81.3687	147671	1.0905	2624	0.9428	0.771708	1.07372	1.43423
BCL3.t3_rep1	20971106	20491225	17932522	87.5131	17314103	84.4952	501907	2.8988	13064	0.9802	0.801119	1.03925	1.19474
BCL3.t3_rep2	17873177	17362731	15073610	86.8158	14654849	84.404	958815	6.5426	21713	0.9809	0.824224	1.09818	1.32864
BCL3.t4_rep1	20529591	20057188	17392586	86.7149	16898108	84.2496	406991	2.4085	12544	0.9839	0.8133	1.03505	1.12314
BCL3.t4_rep2	15628881	15231749	13285966	87.2254	13045955	85.6497	232612	1.783	7990	0.9866	0.844749	1.03517	1.04843
BCL3.t5_rep1	19658022	19205694	17006189	88.5476	15753817	82.0268	1619827	10.2821	25628	0.9554	0.771235	1.16263	1.39767
BCL3.t5_rep2	17917339	17313018	15241327	88.0339	14404690	83.2014	1985005	13.7802	29206	0.9607	0.794437	1.25774	1.38977
BCL3.t5_rep3	13916222	13423894	11541061	85.974	11262528	83.8991	316531	2.8104	11270	0.9784	0.853878	1.05171	1.15629
BCL3.t6_rep1	17405460	17048835	14855011	87.1321	13556205	79.5139	1578428	11.6435	24863	0.9383	0.770301	1.22465	1.43005
BCL3.t6_rep2	18028048	17621681	15235058	86.4563	14817632	84.0875	1210656	8.1703	26128	0.9809	0.823598	1.13472	1.46835
BCL3.t6_rep3	17405816	16879298	14862084	88.0491	14284710	84.6285	942882	6.6006	17817	0.9701	0.794782	1.09397	1.4194
BCL3.t7_rep1	18232596	17853877	15808875	88.5458	15053695	84.3161	1440605	9.5697	25405	0.9682	0.797766	1.1393	1.3687
BCL3.t7_rep2	19798042	19341454	16798827	86.854	16115924	83.3232	795980	4.939	18256	0.9754	0.806363	1.06367	1.21826
BCL3.t7_rep3	17965552	17406611	15344239	88.1517	14753654	84.7589	1068583	7.2428	19830	0.9741	0.803375	1.10139	1.40842
BCL3.t8_rep1	19213393	18859492	16325711	86.5649	15822857	83.8986	824396	5.2101	21339	0.9808	0.81911	1.07027	1.31957
BCL3.t8_rep2	21815008	21301394	18405977	86.4073	17778768	83.4629	1065335	5.9921	20382	0.9804	0.799157	1.08474	1.26794
BCL3.t8_rep3	23193100	22465674	19495880	86.7807	18741830	83.4242	715832	3.8194	15527	0.9796	0.780191	1.04621	1.27948
BCL3.t10_rep1	19257390	18801148	16388579	87.1679	16027025	85.2449	581895	3.6307	15445	0.9862	0.820534	1.04497	1.18139
BCL3.t10_rep2	13912877	13568803	11722458	86.3927	11508138	84.8132	344470	2.9932	12069	0.9853	0.862406	1.05887	1.23266
BCL3.t12_rep1	20174140	19714358	17288568	87.6953	16872648	85.5855	430887	2.5537	12129	0.9857	0.810094	1.0364	1.12665
BCL3.t12_rep2	24874985	23989706	20923654	87.2193	20536285	85.6045	570902	2.7799	13222	0.9902	0.781545	1.04061	1.24165
CEBPB.t00_rep1	20770214	20288036	17326597	85.403	16948960	83.5416	772594	4.5583	24068	0.9869	0.821324	1.10093	1.65711
CEBPB.t00_rep2	19981661	19465875	16657230	85.5714	16394485	84.2216	241798	1.4748	6923	0.9904	0.828882	1.03851	1.26487
CEBPB.t05_rep1	21771955	21254636	18241678	85.8244	17881684	84.1307	549884	3.0751	17013	0.9887	0.814287	1.06471	1.54932
CEBPB.t05_rep2	19718840	19147103	16692181	87.1786	16227286	84.7506	544390	3.3547	13700	0.9827	0.808369	1.08745	1.59776
CEBPB.t05_rep3	20994589	20342899	17941184	88.1938	16889877	83.0259	93259	0.5521	2374	0.9621	0.759037	1.02764	1.53235
CEBPB.t1_rep1	18888991	18417820	16190727	87.9079	15772271	85.6359	527498	3.3444	12974	0.9836	0.819448	1.0898	1.59206
CEBPB.t1_rep2	18107816	17596972	15284093	86.8563	14971614	85.0806	957478	6.3952	22026	0.9854	0.832863	1.17271	1.66973
CEBPB.t1_rep3	14856401	14385812	12687642	88.1955	12374292	86.0173	38500	0.3111	1329	0.9813	0.846336	1.01931	1.03182
CEBPB.t2_rep1	21474873	20997465	18160020	86.4867	17706251	84.3256	228965	1.2931	6345	0.9861	0.810545	1.03321	1.25519
CEBPB.t2_rep3	16245341	15432495	13693348	88.7306	12060948	78.1529	18319	0.1518	501	0.9134	0.761949	1.03463	1.50619
CEBPB.t3_rep1	20777892	20316312	17777431	87.5032	17138939	84.3604	465241	2.7145	11523	0.9796	0.80314	1.06238	1.5983
CEBPB.t3_rep2	16781165	16325344	14221742	87.1145	13758294	84.2756	1150660	8.3633	29729	0.9757	0.829105	1.24118	1.73164
CEBPB.t4_rep1	20564109	20108469	17439935	86.7293	16882227	83.9558	371989	2.2034	10549	0.982	0.812453	1.05115	1.44767
CEBPB.t4_rep2	16911615	16385756	14220588	86.7862	13767040	84.0183	662369	4.8112	17981	0.9772	0.828902	1.13107	1.62298
CEBPB.t5_rep1	22552763	22051185	19362432	87.8067	17424178	79.0169	1403394	8.0542	26084	0.9467	0.738076	1.2176	1.80353
CEBPB.t5_rep2	20989610	20488295	18043129	88.0655	16881191	82.3943	1225060	7.2569	23340	0.9622	0.771814	1.20276	1.69424
CEBPB.t5_rep3	14718348	14224846	12279626	86.3251	11955685	84.0479	603718	5.0496	16561	0.9769	0.847201	1.15017	1.74754
CEBPB.t6_rep2	25793342	25196205	21929177	87.0336	20799102	82.5485	2693008	12.9477	45668	0.9708	0.770842	1.37855	1.66916
CEBPB.t6_rep3	14582507	14099514	12238158	86.7984	11653116	82.649	416027	3.57	11684	0.9571	0.8045	1.10081	1.80363
CEBPB.t7_rep1	18531912	18170538	15954442	87.8039	15178507	83.5336	536830	3.5367	14441	0.9694	0.80129	1.07859	1.6468
CEBPB.t7_rep2	18672738	18242390	15850390	86.8876	15303404	83.8892	815615	5.3296	22327	0.9778	0.817847	1.11446	1.68267
CEBPB.t7_rep3	17901046	17353304	15181792	87.4864	14168268	81.6459	470075	3.3178	11913	0.956	0.78787	1.07727	1.65544
CEBPB.t8_rep1	18468619	18113651	15773549	87.081	15242228	84.1477	1229493	8.0663	31400	0.9771	0.823293	1.21703	1.66909
CEBPB.t8_rep2	22956286	22394352	19375124	86.5179	18655230	83.3032	1409806	7.5571	29473	0.9787	0.791596	1.20508	1.69624
CEBPB.t8_rep3	11188959	10846494	9362517	86.3183	9104330	83.9379	177745	1.9523	7162		0.875819	1.05211	1.20083
CEBPB.t10_rep1	22042992	21516422	18758288	87.1812	18309012	85.0931	628186	3.431	15946	0.9865	0.802172	1.06707	1.5318
CEBPB.t10_rep2	21053353	20533788	17812492	86.7472	17366057	84.573	1073865	6.1837	20936	0.9841	0.810699	1.17902	1.65413
CEBPB.t10_rep3	18531467	17932368	15397431	85.8639	15006861	83.6858	421780	2.8105	12484	0.9795	0.821897	1.06627	1.42206
CEBPB.t12_rep1	21966041	21425936	18767846	87.594	18236300	85.1132	655957	3.5969	14687	0.9841	0.797375	1.08407	1.60785
CEBPB.t12_rep2	15531031	15161860	13208241	87.1149	13002659	85.7589	318064	2.4461	9192	0.9881	0.848977	1.06631	1.46243
CEBPB.t12_rep3	20303314	19643935	16825723	85.6535	16413552	83.5553	426374	2.5976	11057	0.9817	0.806489	1.06096	1.41144
cJun.t00_rep2	19596777	19024620	16332859	85.8511	15959701	83.8897	1066829	6.6845	23832	0.9852	0.806659	1.07111	1.31998
cJun.t00_rep3	21526589	20868434	18253860	87.4711	17746148	85.0382	323583	1.8233	7654	0.9844	0.788984	1.02389	0.997151
cJun.t05_rep2	23134783	22443618	19451131	86.6666	18998278	84.6489	1213967	6.3898	23412	0.9869	0.787097	1.06637	1.41332
cJun.t05_rep3	21978169	21374046	18439687	86.2713	17952219	83.9907	338285	1.8843	8983	0.9855	0.804012	1.02159	0.884299
cJun.t1_rep2	22016571	21381195	18434972	86.2204	18014758	84.2551	598996	3.325	14326	0.9871	0.799239	1.03779	1.16132
cJun.t1_rep3	21775759	21149122	18455786	87.265	17986909	85.048	1311406	7.2908	25645	0.9849	0.791289	1.07696	1.34316
cJun.t2_rep2	20806007	20198061	17706832	87.6659	17271272	85.5095	989497	5.7291	20263	0.9851	0.78924	1.05841	1.24641
cJun.t2_rep3	20141789	19547788	17377046	88.8952	16670430	85.2803	1750985	10.5035	27455	0.9743	0.770714	1.12662	1.3486
cJun.t3_rep1	21305214	20781462	17966961	86.4566	17466079	84.0464	796932	4.5627	17860	0.984	0.803426	1.0515	1.25319
cJun.t3_rep2	20587730	19990599	17165340	85.867	16765060	83.8647	565107	3.3707	14638	0.9862	0.816771	1.03469	1.05916
cJun.t3_rep3	23104149	22434381	19244670	85.782	18716021	83.4256	480528	2.5674	11576	0.9853	0.793318	1.03513	1.11281
cJun.t4_rep1	22481318	21868048	19159560	87.6144	18636493	85.2224	1110955	5.9611	18536	0.9848	0.786872	1.05372	1.252
cJun.t4_rep2	19715537	19153906	16839025	87.9143	16194026	84.5468	1182449	7.3017	23568	0.9763	0.789478	1.08404	1.34014
cJun.t4_rep3	23786787	23064082	19889663	86.2365	19280888	83.597	1710623	8.8721	28946	0.9828	0.776932	1.10576	1.4128
cJun.t5_rep1	23492047	22936158	20073093	87.5172	19620711	85.5448	756860	3.8574	14789	0.9879	0.781816	1.04054	1.24113
cJun.t5_rep2	22129604	21530883	18535410	86.0875	17847679	82.8933	543852	3.0471	13564	0.9798	0.794663	1.03414	1.10067
cJun.t5_rep3	27866876	27036839	23218578	85.8775	22597457	83.5802	577241	2.5544	8924	0.9874	0.766324	1.03885	1.18107
cJun.t6_rep1	20705299	20186181	17961671	88.98	16743913	82.9474	946227	5.6511	12538	0.9593	0.748725	1.14295	1.38959
cJun.t6_rep2	21497629	20920919	18346291	87.6935	17953556	85.8162	974550	5.4281	19262	0.9872	0.790857	1.05781	1.23031
cJun.t6_rep3	22167046	21562381	18879616	87.5581	18203074	84.4205	1225796	6.734	29247	0.9801	0.780592	1.074	1.5003
cJun.t7_rep1	21152150	20501811	18069190	88.1346	17472668	85.2249	1074265	6.1482	21717	0.9809	0.783719	1.05154	1.20584
cJun.t7_rep2	20200606	19602511	17169126	87.5863	16743657	85.4158	918236	5.484	19234	0.9849	0.805787	1.04664	1.14762
cJun.t7_rep3	19815303	19247943	17228985	89.5107	15881865	82.512	2341451	14.7429	32602	0.9515	0.742527	1.19335	1.41083
cJun.t8_rep1	21180704	20523856	17704991	86.2654	17186628	83.7397	1747921	10.1702	32397	0.9817	0.777877	1.1065	1.40114
cJun.t8_rep2	22185739	21568660	18963663	87.9223	18353952	85.0954	1286482	7.0092	22745	0.9821	0.784483	1.05913	1.24606
cJun.t8_rep3	21949976	21369017	18557178	86.8415	17940193	83.9542	679660	3.7884	15957	0.9817	0.789672	1.03838	1.15932
cJun.t10_rep1	22049962	21411360	18286098	85.4037	17879037	83.5025	543231	3.0383	12960	0.9871	0.795682	1.03354	1.06611
cJun.t10_rep2	21029089	20462591	17973509	87.8359	17545684	85.7451	714088	4.0698	15169	0.9861	0.797332	1.04034	1.2003
cJun.t10_rep3	25106058	24366624	21835007	89.6103	20547955	84.3282	2802563	13.6391	30570	0.9691	0.727092	1.17736	1.37531
cJun.t12_rep1	20440061	19827931	17092040	86.2018	16719520	84.323	880000	5.2633	20021	0.9866	0.808641	1.05033	1.19734
cJun.t12_rep2	21901313	21232971	18474642	87.0092	17873947	84.1801	3521605	19.7024	56994	0.9783	0.787709	1.2526	1.49641
cJun.t12_rep3	26106908	25396789	22548140	88.7834	21841311	86.0002	1793444	8.2112	24197	0.9841	0.746694	1.07554	1.26665
CTCF.t00_rep1	21341840	20740557	18373869	88.589	17675612	85.2224	2338278	13.2288	34834	0.9768	0.791505	1.30788	2.00903
CTCF.t00_rep2	21198090	20588215	17826113	86.584	17271931	83.8923	2377643	13.7659	38143	0.9797	0.807564	1.31396	1.69434
CTCF.t00_rep3	20703915	20072608	17741737	88.3878	17206088	85.7192	2154609	12.5223	36732	0.9806	0.798295	1.26917	1.77571
CTCF.t05_rep1	22687043	22103214	19435114	87.9289	18812564	85.1123	2332687	12.3996	37932	0.9815	0.795136	1.25333	2.07808
CTCF.t05_rep2	20225190	19664077	17107785	87.0001	16611190	84.4748	2000374	12.0423	36575	0.9807	0.814577	1.29461	1.81145
CTCF.t05_rep3	22957576	22247893	19367789	87.0544	18592154	83.5681	3432833	18.4638	49406	0.9754	0.803351	1.48893	2.09461
CTCF.t1_rep1	20859912	20347049	17746076	87.2169	17141130	84.2438	2026586	11.8229	35484	0.9787	0.808664	1.27817	1.97205
CTCF.t1_rep2	21913478	21265796	18459523	86.8038	17689743	83.184	3327477	18.8102	46898	0.9728	0.805971	1.54313	1.97671
CTCF.t1_rep3	18286705	17705038	15553478	87.8477	14834831	83.7887	3314752	22.3443	47985	0.9639	0.815827	1.75055	1.82211
CTCF.t2_rep1	16673929	16188590	14337097	88.5629	13987381	86.4027	1158932	8.2855	26703	0.9821	0.822459	1.1362	1.61821
CTCF.t2_rep2	18850410	18241620	15964223	87.5153	15452520	84.7102	2104817	13.6211	36265	0.9774	0.808512	1.32502	1.75612
CTCF.t2_rep3	20255221	19664762	17558141	89.2873	16779855	85.3295	2604590	15.5221	37342	0.9707	0.790844	1.40613	1.62655
CTCF.t3_rep1	23066258	22478973	19435359	86.4601	18839149	83.8078	2174163	11.5406	35968	0.9824	0.799517	1.24564	2.03324
CTCF.t3_rep2	22105500	21446494	18576791	86.6192	17964504	83.7642	2443440	13.6014	42141	0.98	0.808373	1.30705	1.90933
CTCF.t3_rep3	18615304	18074884	15659528	86.6369	15260683	84.4303	1306088	8.5585	32976	0.9829	0.829809	1.16943	1.58697
CTCF.t4_rep1	22615876	22003079	19087722	86.7502	18612149	84.5888	913734	4.9093	22200	0.9865	0.796445	1.06596	1.59527
CTCF.t4_rep2	19930282	19327655	17022055	88.0709	16001455	82.7904	2241817	14.01	37614	0.9624	0.787199	1.32775	1.7555
CTCF.t4_rep3	22639823	21964235	19067442	86.8113	18312685	83.375	2435182	13.2977	37442	0.9764	0.793864	1.27877	1.5396
CTCF.t5_rep1	21328213	20812522	18402571	88.4206	17529954	84.2279	2984713	17.0263	40338	0.9699	0.797516	1.505	1.98627
CTCF.t5_rep2	21356695	20775039	18084507	87.0492	17345955	83.4942	2577326	14.8583	42573	0.9742	0.809769	1.42163	1.99664
CTCF.t5_rep3	24656536	23918694	20861123	87.2168	19836453	82.9328	3246743	16.3675	41213	0.97	0.800954	1.67375	2.00657
CTCF.t6_rep1	20188386	19671751	17591894	89.4271	16277110	82.7435	2803644	17.2244	32699	0.9498	0.775365	1.58114	1.66659
CTCF.t6_rep2	23011359	22361916	19734722	88.2514	19093000	85.3817	2623480	13.7405	37527	0.9804	0.789458	1.30723	1.73568
CTCF.t7_rep1	22809006	22257297	19532248	87.7566	18825276	84.5802	1758380	9.3405	33542	0.9801	0.782837	1.16559	1.96576
CTCF.t7_rep2	20366077	19821567	17448091	88.0257	16915852	85.3406	2089631	12.353	37815	0.9809	0.811475	1.265	2.09312
CTCF.t7_rep3	20526145	19910505	17722918	89.0129	16364651	82.191	2992409	18.2858	39989	0.9514	0.770015	1.54344	1.76462
CTCF.t8_rep1	21014714	20364809	17798696	87.3992	17223555	84.575	2268535	13.1711	39175	0.9793	0.799992	1.27296	1.6147
CTCF.t8_rep2	22335194	21742445	19046148	87.5989	18584807	85.477	1235210	6.6463	28234	0.9867	0.799732	1.09242	1.84431
CTCF.t8_rep3	21946337	21354758	18669733	87.4265	17919641	83.914	2533346	14.1372	40820	0.9754	0.794599	1.31626	1.60715
CTCF.t10_rep1	21804193	21161875	18411247	87.0019	17750111	83.8777	2850317	16.058	45076	0.977	0.802901	1.38668	1.79861
CTCF.t10_rep2	22370704	21756724	19091038	87.7477	18502724	85.0437	1892175	10.2264	33704	0.9824	0.794887	1.19447	1.92509
CTCF.t10_rep3	26153812	25381501	22740628	89.5952	20308014	80.011	4056639	19.9755	42739	0.9448	0.726553	1.63326	1.82586
CTCF.t12_rep1	24127228	23456700	20342313	86.7228	19693936	83.9586	2380224	12.086	40147	0.9819	0.791091	1.25391	1.76639
CTCF.t12_rep2	21004343	20362326	17523933	86.0605	16914990	83.07	2844623	16.8171	45742	0.9756	0.823636	1.52636	1.77333
CTCF.t12_rep3	26425367	25702157	22831647	88.8316	22034141	85.7287	2792947	12.6755	39312	0.9814	0.763879	1.27133	1.66671
EP300.t00_rep1	21212342	20701629	17620671	85.1173	17260458	83.3772	89417	0.518	2151	0.9886	0.826196	1.01699	0.823453
EP300.t00_rep2	20038417	19492655	16676201	85.5512	16344232	83.8481	479073	2.9311	8998	0.9876	0.828214	1.08939	1.71252
EP300.t00_rep3	13381418	12978069	11412212	87.9345	10904768	84.0245	9972	0.0914	328	0.9568	0.830006	1.02052	1.21611
EP300.t05_rep1	21458100	20905921	17946099	85.8421	17599909	84.1862	76527	0.4348	2077	0.9893	0.822304	1.01356	0.763805
EP300.t05_rep2	18544219	18010953	15777149	87.5975	15433880	85.6916	273162	1.7698	5841	0.9861	0.825531	1.04603	1.51124
EP300.t05_rep3	26592181	25405334	22445208	88.3484	20996947	82.6477	112129	0.534	1855	0.966	0.719778	1.02404	1.51176
EP300.t1_rep1	21033802	20576714	18093186	87.9303	17553837	85.3092	246269	1.4029	4825	0.9833	0.80351	1.04073	1.51016
EP300.t1_rep3	11199902	10740468	9456743	88.0477	9243598	86.0632	32977	0.3567	1046		0.880279	1.02273	1.03045
EP300.t2_rep1	21820462	21336948	18531488	86.8516	18102800	84.8424	68551	0.3786	1862	0.9874	0.810847	1.01548	0.885107
EP300.t2_rep2	19660235	18799079	16259349	86.4901	15867224	84.4042	273990	1.7267	5884	0.9852	0.824205	1.04965	1.4817
EP300.t2_rep3	19448186	18685617	16537866	88.5058	14338801	76.7371	57006	0.3975	1056	0.9186	0.727443	1.04502	1.75793
EP300.t3_rep1	20225792	19780955	17280108	87.3572	16677478	84.3107	138983	0.8333	3132	0.9799	0.811724	1.02612	1.26004
EP300.t3_rep2	19355860	18813671	16314134	86.7142	15788093	83.9181	661481	4.1897	11737	0.9794	0.820911	1.13345	1.72709
EP300.t4_rep1	19897100	19468432	16821736	86.4051	16365117	84.0597	103927	0.635	2689	0.9844	0.823804	1.02003	0.994034
EP300.t4_rep2	17941178	17436061	15174075	87.0269	14790154	84.825	231316	1.5639	5106	0.9835	0.830105	1.04549	1.39903
EP300.t5_rep1	14946286	13071095	11409372	87.287	10739127	82.1593	299299	2.7869	6987	0.9514	0.833451	1.09711	1.77403
EP300.t5_rep2	16305742	15914824	13952428	87.6693	13293898	83.5315	420837	3.1656	8338	0.9654	0.822058	1.09534	1.68284
EP300.t5_rep3	12650003	12276620	10550735	85.9416	10310826	83.9874	323813	3.1405	7548	0.9779	0.870352	1.12082	1.81754
EP300.t6_rep1	20307879	19911629	17392583	87.3488	15675335	78.7245	428728	2.735	7085	0.942	0.75213	1.09497	1.85957
EP300.t6_rep2	15737789	15360511	13146450	85.586	12733200	82.8956	742793	5.8335	13206	0.9752	0.845633	1.24718	1.87356
EP300.t6_rep3	13250448	12834679	11232580	87.5174	10741802	83.6935	193500	1.8013	4712	0.9577	0.82893	1.06154	1.72911
EP300.t7_rep1	19851655	19483754	17170676	88.1281	16433218	84.3431	242747	1.4771	5079	0.975	0.802527	1.03858	1.43201
EP300.t7_rep2	16053379	15677371	13539789	86.3651	13143193	83.8354	137451	1.0457	3686	0.9794	0.847389	1.03033	1.12088
EP300.t7_rep3	19403767	18810701	16438944	87.3914	14977681	79.6231	742667	4.9584	12095	0.9449	0.766555	1.16178	2.00969
EP300.t8_rep1	18273641	17926386	15240835	85.019	14759279	82.3327	562103	3.8084	10909	0.9789	0.825721	1.12565	1.69493
EP300.t8_rep2	20386669	19890731	17054543	85.7411	16510489	83.0059	221550	1.3418	4498	0.9814	0.818404	1.03963	1.29559
EP300.t8_rep3	15531577	15053228	13029463	86.5559	12501785	83.0505	131019	1.048	3507	0.9703	0.839444	1.03021	1.11813
EP300.t10_rep1	18412757	17992068	15672287	87.1066	15299050	85.0321	418577	2.7359	7942	0.9846	0.832515	1.0775	1.60076
EP300.t10_rep3	14191667	13716424	11700290	85.3013	11408861	83.1766	194538	1.7051	5041	0.9757	0.857332	1.05809	1.40061
EP300.t12_rep1	22801663	22267552	19455040	87.3694	18989959	85.2808	302000	1.5903	5428	0.9872	0.79815	1.03972	1.43289
EP300.t12_rep2	17556077	17153305	14923470	87.0005	14709610	85.7537	196726	1.3373	4313	0.9904	0.838608	1.03889	1.33465
EP300.t12_rep3	14258396	13817920	11805151	85.4336	11610530	84.0251	135861	1.1701	3660	0.9841	0.864321	1.04066	1.22257
FOSL2.t00_rep1	20508300	20023794	17025919	85.0284	16663662	83.2193	360050	2.1606	12086	0.9877	0.828035	1.0433	1.41313
FOSL2.t00_rep2	19741964	19221841	16527133	85.981	16235498	84.4638	341162	2.1013	10010	0.9893	0.831246	1.04633	1.41609
FOSL2.t05_rep1	21319752	20812533	17837942	85.7076	17475278	83.9651	305165	1.7462	10124	0.9886	0.820259	1.03242	1.29354
FOSL2.t05_rep2	20578996	19650913	17025711	86.6408	16575726	84.3509	352828	2.1285	9790	0.9842	0.8027	1.04742	1.55271
FOSL2.t05_rep3	18828672	18254258	16090874	88.1486	15233413	83.4512	43967	0.2886	1389	0.9618	0.77906	1.0237	1.53093
FOSL2.t1_rep1	19068701	18617631	16361623	87.8824	15804577	84.8903	159558	1.0095	4881	0.9794	0.81318	1.0301	1.2898
FOSL2.t1_rep2	18648178	18064175	15589724	86.3018	15284666	84.6131	627575	4.1059	15637	0.9871	0.833505	1.09297	1.68633
FOSL2.t1_rep3	13787682	13273527	11680060	87.9951	11406115	85.9313	4353	0.0381	163	0.9811	0.859586	1.01426	0.860134
FOSL2.t2_rep1	21416479	20922878	18118434	86.5962	17709874	84.6435	63974	0.3612	2154	0.9875	0.81419	1.01511	0.862636
FOSL2.t2_rep2	19212042	18640425	16112870	86.4404	15825544	84.899	246071	1.5548	7506	0.989	0.828041	1.03866	1.32875
FOSL2.t2_rep3	18323980	17671182	15662176	88.6311	13701770	77.5373	662	0.0048	19	0.92	0.74234	1.02628	1.44842
FOSL2.t3_rep1	20030354	19588316	17094469	87.2687	16443422	83.945	78054	0.4746	2594	0.9776	0.810928	1.0188	1.03396
FOSL2.t3_rep2	18077865	17555353	15227532	86.7401	14749187	84.0153	838842	5.6873	20415	0.9788	0.825955	1.14478	1.77898
FOSL2.t4_rep1	19179564	18757056	15989258	85.2439	15515713	82.7193	144034	0.9283	5124	0.9823	0.816849	1.03105	1.21625
FOSL2.t4_rep2	21148308	20387448	17615471	86.4035	17033768	83.5502	326967	1.9195	9089	0.9811	0.802642	1.04632	1.52239
FOSL2.t5_rep1	23320048	22802861	20047220	87.9153	18465091	80.977	402210	2.1782	9072	0.9605	0.753228	1.0563	1.70275
FOSL2.t5_rep2	16491138	16114576	14123707	87.6455	13517940	83.8864	466458	3.4506	12695	0.9696	0.818438	1.08542	1.71345
FOSL2.t5_rep3	14567622	14049316	12057433	85.8222	11747883	83.6188	281481	2.396	9126	0.978	0.854257	1.05926	1.45886
FOSL2.t6_rep1	21251538	20844543	18290617	87.7477	16418980	78.7687	316752	1.9291	7242	0.9425	0.743323	1.06365	1.77568
FOSL2.t6_rep2	16909821	16527560	14212307	85.9915	13785398	83.4085	559053	4.0553	15081	0.979	0.837312	1.1121	1.76609
FOSL2.t6_rep3	12610277	12164398	10659593	87.6294	10250480	84.2662	88264	0.861	3338	0.9614	0.842047	1.03397	1.35431
FOSL2.t7_rep1	20601024	20185807	17735694	87.8621	16856725	83.5078	208444	1.2365	6136	0.9721	0.79277	1.03122	1.41074
FOSL2.t7_rep2	20581648	20127121	17401383	86.4573	16702745	82.9862	380425	2.2776	11322	0.977	0.805301	1.04407	1.45305
FOSL2.t7_rep3	20650772	20014090	17399494	86.9362	16137453	80.6304	624039	3.867	13089	0.9579	0.769011	1.08686	1.76732
FOSL2.t8_rep1	18210626	17855635	15409676	86.3014	14910895	83.508	751421	5.0394	19387	0.9788	0.829086	1.1223	1.7369
FOSL2.t8_rep2	16068183	15661213	13473188	86.029	13121243	83.7817	382907	2.9182	12730	0.9813	0.847928	1.0671	1.51858
FOSL2.t8_rep3	19849234	19215913	16355855	85.1162	15588590	81.1233	296076	1.8993	8560	0.9717	0.793666	1.04339	1.42303
FOSL2.t10_rep1	19942448	19480671	16939201	86.9538	16536984	84.8891	453754	2.7438	11879	0.9858	0.819632	1.05551	1.52432
FOSL2.t10_rep2	19406059	18940350	16351395	86.331	16024702	84.6061	744502	4.6459	17216	0.9869	0.828481	1.12217	1.80354
FOSL2.t10_rep3	18035791	17408553	14874296	85.4424	14361228	82.4952	217522	1.5146	6927	0.9712	0.817539	1.03988	1.29178
FOSL2.t12_rep1	20826261	20346704	17744422	87.2103	17323135	85.1397	242310	1.3987	6916	0.9865	0.810676	1.0301	1.27382
FOSL2.t12_rep2	15250608	14890573	12918940	86.7591	12717015	85.4031	94955	0.7466	3308	0.9886	0.855059	1.02656	1.09704
FOSL2.t12_rep3	22015251	21365797	18361652	85.9394	17914437	83.8463	141647	0.7906	3682	0.9833	0.800171	1.02423	1.10741
GR.t00_rep2	14407988	14169459	12208442	86.1602	11918412	84.1133	0	0	0	0.9812	0.868379	1.00701	0.348478
GR.t00_rep3	16107764	15775669	13685182	86.7486	13168495	83.4734	0	0	0	0.9731	0.843224	1.00769	0.478192
GR.t05_rep1	22572932	22086989	19225622	87.045	18770782	84.9856	881989	4.6987	15299	0.9853	0.810099	1.13263	1.97889
GR.t05_rep2	16558117	16271089	14078805	86.5265	13735009	84.4135	241572	1.7588	5717	0.9824	0.849476	1.049	1.47808
GR.t05_rep3	18699133	18295578	16016485	87.5429	15483998	84.6324	704781	4.5516	13435	0.9781	0.822684	1.14561	1.80232
GR.t1_rep1	19094594	18683323	16418057	87.8754	16065647	85.9892	375309	2.336	7795	0.986	0.825472	1.06085	1.70231
GR.t1_rep2	18931582	18602499	16448096	88.4187	15889281	85.4147	547083	3.443	8946	0.9779	0.811212	1.10628	1.93953
GR.t1_rep3	19357699	18950652	16573225	87.4546	16124744	85.088	524036	3.2498	9120	0.9823	0.825728	1.11804	1.82115
GR.t2_rep1	19977918	19503522	17259057	88.492	16815599	86.2182	253946	1.5101	5175	0.9843	0.806687	1.03646	1.44504
GR.t2_rep2	19539003	19192746	16893562	88.0205	16304742	84.9526	408695	2.5066	6852	0.9769	0.811451	1.07077	1.77242
GR.t2_rep3	17986537	17608907	15278064	86.7632	14838165	84.2651	712339	4.8007	11947	0.9794	0.840614	1.20648	1.90591
GR.t3_rep1	24419069	23909239	20844780	87.1829	20410437	85.3663	359934	1.7634	5497	0.9883	0.794371	1.04685	1.62457
GR.t3_rep2	21229482	20869018	18197056	87.1965	17648186	84.5664	26165	0.1482	600	0.9828	0.812008	1.01068	0.71041
GR.t3_rep3	17328683	16968406	14754116	86.9505	14306517	84.3126	447425	3.1274	8923	0.979	0.837643	1.11244	1.7997
GR.t4_rep1	19893550	19470780	16977719	87.1958	16608703	85.3006	266525	1.6047	5194	0.9863	0.825846	1.04283	1.49591
GR.t4_rep2	19442449	19109737	16770713	87.76	16295115	85.2712	15360	0.0942	415	0.9827	0.819268	1.00841	0.613542
GR.t4_rep3	17494291	17120794	14910703	87.0911	14303281	83.5433	130547	0.9127	3070	0.9729	0.827087	1.03395	1.35297
GR.t5_rep1	19520717	18967630	16757244	88.3465	16191652	85.3646	150378	0.9287	2258	0.9785	0.806565	1.04494	1.44898
GR.t5_rep2	13865313	13588504	11901779	87.5871	11601092	85.3743	10920	0.0941	358	0.9793	0.862984	1.01148	0.612275
GR.t5_rep3	18953742	18554314	16013061	86.3037	15456044	83.3016	210679	1.363	4382	0.9782	0.824097	1.04991	1.53052
GR.t6_rep1	19552179	19073479	16748735	87.8116	16381007	85.8836	262750	1.6039	3652	0.9859	0.823565	1.0589	1.6335
GR.t6_rep2	17043091	16731731	14457560	86.408	14125385	84.4227	6610	0.0467	206	0.9839	0.850697	1.00817	0.46003
GR.t6_rep3	32282102	31577403	27270499	86.3608	25008007	79.1958	241120	0.9641	3558	0.9673	0.71245	1.03147	1.47763
GR.t7_rep1	21977311	19694269	17234278	87.5091	16819332	85.4021	167249	0.9943	3618	0.9854	0.819029	1.03025	1.25619
GR.t7_rep2	19745865	19357592	16700156	86.2718	16345149	84.4379	136876	0.8374	2900	0.9867	0.834234	1.02368	1.08224
GR.t7_rep3	12265751	11954494	10413995	87.1136	10105502	84.533	286853	2.8385	6490	0.9721	0.870341	1.11987	1.88471
GR.t8_rep1	22762058	19516033	16974362	86.9764	16480596	84.4464	111467	0.6763	2707	0.9825	0.821066	1.02128	1.01546
GR.t8_rep2	20009191	19584805	16983278	86.7166	16570837	84.6106	133741	0.807	3027	0.985	0.82827	1.02366	1.08773
GR.t8_rep3	19213019	18805886	16202394	86.1559	15702860	83.4997	250815	1.5972	4570	0.9806	0.830802	1.05475	1.52971
GR.t10_rep1	24064136	20969111	18389083	87.696	17786868	84.8241	33366	0.1875	848	0.9816	0.805939	1.01189	0.791014
GR.t10_rep2	15247719	14951833	13061332	87.356	12697794	84.9246	138182	1.0882	3081	0.9786	0.849538	1.03946	1.38983
GR.t10_rep3	31574080	30858331	27009301	87.5267	23031348	74.6357	21928	0.0952	300	0.9401	0.664082	1.02912	1.60988
GR.t12_rep1	22181052	19846152	17061253	85.9675	16653674	83.9138	10938	0.0656	345	0.9853	0.830614	1.00778	0.456646
GR.t12_rep2	17648777	17295596	15030861	86.9057	14695293	84.9655	210028	1.4292	4124	0.9846	0.842266	1.04473	1.50935
GR.t12_rep3	18013798	17620784	15160502	86.0376	14613584	82.9337	239997	1.6422	4871	0.9761	0.834094	1.0583	1.54827
H3K27ac.t00_rep1	45242838	43956471	39719546	90.361	37556623	85.4404	14014298	37.3151	67556	0.9777	0.669214	1.14208	1.45902
H3K27ac.t00_rep2	32512635	31991053	28646596	89.5456	26960058	84.2737	11398394	42.2788	55691	0.9687	0.717878	1.22082	1.51329
H3K27ac.t00_rep3	39006438	37901856	34296427	90.4874	29658476	78.2507	13172704	44.4146	56479	0.9439	0.671754	1.30542	1.40871
H3K27ac.t05_rep1	31286473	30416021	27418190	90.1439	26170003	86.0401	10634820	40.6374	75568	0.9732	0.72471	1.21412	1.55297
H3K27ac.t05_rep2	62881097	61818602	55931113	90.4761	50934308	82.3931	17268266	33.903	52048	0.9747	0.620007	1.14038	1.45277
H3K27ac.t05_rep3	32977410	32032252	29139802	90.9701	25990104	81.1372	10872250	41.8322	60603	0.95	0.666048	1.24303	1.43292
H3K27ac.t1_rep1	33845710	32871060	29785791	90.614	28401192	86.4018	9456430	33.2958	65123	0.9764	0.702061	1.16455	1.46572
H3K27ac.t1_rep2	37758590	37117577	33885760	91.293	31447272	84.7233	12010358	38.192	49660	0.9687	0.665907	1.17762	1.51749
H3K27ac.t1_rep3	34278516	33289827	30188501	90.6838	27016984	81.1568	12053899	44.616	63050	0.95	0.679629	1.31862	1.58664
H3K27ac.t2_rep1	35798603	34746636	31276752	90.0137	30091939	86.6038	7618109	25.3161	49806	0.9821	0.701912	1.12563	1.34392
H3K27ac.t2_rep2	33759591	33162302	30161301	90.9505	28179249	84.9737	10674727	37.8815	48835	0.969	0.675283	1.17166	1.47925
H3K27ac.t2_rep3	32674667	31681937	28576398	90.1977	25402060	80.1783	11651730	45.8692	64496	0.9452	0.690062	1.34651	1.57799
H3K27ac.t3_rep1	52799011	51211267	46236745	90.2862	43683059	85.2997	14100738	32.2796	59382	0.9796	0.659762	1.14813	1.42818
H3K27ac.t3_rep2	37854222	37237621	33577336	90.1704	31968741	85.8506	8390926	26.2472	48158	0.9798	0.689789	1.11143	1.51651
H3K27ac.t3_rep3	48212441	46732343	42139535	90.172	33459691	71.5985	15560463	46.5051	62065	0.9329	0.590726	1.2551	1.49563
H3K27ac.t4_rep1	40842180	39734281	35749199	89.9706	34093929	85.8048	9941123	29.158	55238	0.9796	0.701394	1.1576	1.47976
H3K27ac.t4_rep2	26595478	26151701	23489519	89.8202	22602588	86.4287	6217850	27.5094	50865	0.9789	0.71779	1.09803	1.42457
H3K27ac.t4_rep3	38692775	37569452	33845953	90.089	30008832	79.8756	11424059	38.0689	52861	0.9558	0.667246	1.20729	1.47185
H3K27ac.t5_rep1	44189530	42880395	38779658	90.4368	35859464	83.6267	5023461	14.0087	28213	0.975	0.655024	1.1356	1.50641
H3K27ac.t5_rep2	36680172	36031069	32449657	90.0602	30880099	85.704	8774229	28.4138	41884	0.978	0.699664	1.13307	1.53563
H3K27ac.t5_rep3	37634226	36509521	32877554	90.052	28478672	78.0034	12132184	42.6009	62950	0.9461	0.659125	1.25614	1.52622
H3K27ac.t6_rep1	54120335	52529011	47324688	90.0924	44624872	84.9528	9122511	20.4426	38760	0.9808	0.650594	1.1241	1.4466
H3K27ac.t6_rep2	34549174	33950117	30336114	89.3549	29113179	85.7528	7294449	25.0554	45475	0.981	0.714473	1.1134	1.52144
H3K27ac.t6_rep3	36307723	35247859	31694880	89.92	28620442	81.1976	11818416	41.2936	63290	0.9567	0.69519	1.27851	1.52977
H3K27ac.t7_rep1	51370388	49844882	45065418	90.4113	42281613	84.8263	14367770	33.9811	62377	0.9777	0.658275	1.15092	1.46227
H3K27ac.t7_rep2	39928113	39206954	35240796	89.884	33062515	84.3281	13182456	39.8713	52646	0.9722	0.706524	1.19953	1.52985
H3K27ac.t7_rep3	46559980	45170220	41007047	90.7833	31284858	69.2599	15094271	48.2478	52126	0.922	0.557887	1.23688	1.53684
H3K27ac.t8_rep1	34728874	34112648	30777886	90.2242	29585531	86.7289	9170439	30.9963	59713	0.9809	0.708209	1.12305	1.42703
H3K27ac.t8_rep2	31500599	30904593	27839369	90.0816	26151336	84.6195	11159244	42.6717	51706	0.9672	0.728704	1.24581	1.52126
H3K27ac.t10_rep1	36212406	34201736	30806792	90.0737	29427753	86.0416	5799088	19.7061	45827	0.9801	0.706	1.09778	1.43816
H3K27ac.t10_rep2	26643306	26133232	23743062	90.8539	22375353	85.6203	10001305	44.6978	50629	0.9646	0.701146	1.22818	1.53694
H3K27ac.t10_rep3	137612018	133592094	120669017	90.3264	42993035	32.1823	8056969	18.7401	30466	0.8935	0.161222	1.13799	1.5522
H3K27ac.t12_rep1	42927671	42194396	37409508	88.6598	36102274	85.5617	6064716	16.7987	43644	0.9857	0.690989	1.07968	1.44316
H3K27ac.t12_rep2	26060550	25568770	23225945	90.8371	21946507	85.8332	9750439	44.4282	58053	0.9652	0.72136	1.24461	1.53085
H3K27ac.t12_rep3	38531506	37438782	33802511	90.2874	30646581	81.8578	12826558	41.8531	68835	0.961	0.685318	1.21646	1.49394
H3K4me1.t00_rep1	44038101	42850699	38511503	89.8736	36903158	86.1203	6864106	18.6003	85124	0.9854	0.633988	1.05781	1.09836
H3K4me1.t00_rep2	39854279	39152355	35332471	90.2435	33804600	86.3411	10183077	30.1233	86048	0.9834	0.64287	1.07236	1.22747
H3K4me1.t00_rep3	36951852	36232631	32268176	89.0583	29236413	80.6908	3347860	11.4509	55383	0.9675	0.642819	1.04672	1.07847
H3K4me1.t05_rep1	52444901	51043370	45833741	89.7937	43825292	85.8589	8604627	19.6339	88209	0.9865	0.611462	1.06002	1.10301
H3K4me1.t05_rep2	28300470	27817363	24989340	89.8336	24052815	86.4669	4859267	20.2024	88600	0.9815	0.686915	1.06559	1.09461
H3K4me1.t05_rep3	41693272	40839871	36781078	90.0616	33140133	81.1465	5124480	15.463	65022	0.9685	0.610112	1.0698	1.14125
H3K4me1.t1_rep1	35699590	34751798	31167332	89.6855	29947491	86.1753	3891408	12.9941	62046	0.9842	0.666953	1.05359	1.0879
H3K4me1.t1_rep2	55643896	54612999	49378817	90.4158	45872734	83.9959	6132324	13.3681	42538	0.9813	0.586522	1.05594	1.13667
H3K4me1.t1_rep3	36168060	35434858	31780145	89.6861	29845418	84.2261	3333505	11.1692	52316	0.9773	0.659767	1.06268	1.1567
H3K4me1.t2_rep1	43452633	42230866	38098073	90.2138	35486894	84.0307	3649975	10.2854	49302	0.9788	0.616552	1.04916	1.09264
H3K4me1.t2_rep2	34083926	33349388	30172403	90.4736	28215680	84.6062	4604570	16.3191	51744	0.9746	0.649792	1.05778	1.16188
H3K4me1.t2_rep3	37390985	36639848	32759177	89.4086	30975123	84.5394	4744373	15.3167	69906	0.9797	0.656468	1.0732	1.17824
H3K4me1.t3_rep1	47873801	46539342	41647350	89.4884	40010702	85.9717	4027225	10.0653	50750	0.9872	0.628962	1.0486	1.08822
H3K4me1.t3_rep2	25859220	25382635	22718995	89.506	21976086	86.5792	2227129	10.1343	41352	0.9832	0.724847	1.03885	1.04764
H3K4me1.t3_rep3	39396628	38607078	34482568	89.3166	31854717	82.51	4963941	15.583	71243	0.9741	0.639296	1.06581	1.18809
H3K4me1.t4_rep1	46302667	45088882	40397813	89.5959	38726261	85.8887	4358490	11.2546	57788	0.9866	0.632129	1.04766	1.0908
H3K4me1.t4_rep2	35657788	34970935	31438157	89.8979	30156589	86.2332	3586109	11.8916	46214	0.9842	0.667017	1.03712	1.12122
H3K4me1.t4_rep3	38362186	37597877	33333828	88.6588	30785620	81.8812	988375	3.2105	18456	0.9744	0.652129	1.03218	1.09277
H3K4me1.t5_rep1	50656676	49117747	44483574	90.5651	40710877	82.8842	768540	1.8878	7354	0.9773	0.586744	1.05549	1.2138
H3K4me1.t5_rep2	31678345	31103856	27824754	89.4575	26873254	86.3984	1918741	7.1399	26992	0.9851	0.696852	1.03208	1.12373
H3K4me1.t5_rep3	37836581	37084555	32738907	88.2817	30600744	82.5161	2735938	8.9407	49550	0.9771	0.659188	1.04585	1.14631
H3K4me1.t6_rep1	33561511	32659033	29265845	89.6102	28361453	86.841	625216	2.2044	9094	0.9867	0.686108	1.04576	1.07173
H3K4me1.t6_rep2	30696086	30123272	26630537	88.4051	25794137	85.6286	531003	2.0586	11588	0.986	0.719598	1.02228	0.936384
H3K4me1.t6_rep3	45016332	44118276	38911140	88.1973	36041881	81.6937	2781334	7.7169	43878	0.978	0.627833	1.04105	1.15254
H3K4me1.t7_rep1	47457139	46123260	41488198	89.9507	39358707	85.3337	5989603	15.2179	75757	0.9843	0.622691	1.05149	1.10479
H3K4me1.t7_rep2	32032714	31412885	27878459	88.7484	26885290	85.5868	3422491	12.7299	52548	0.9847	0.707234	1.03457	1.09215
H3K4me1.t7_rep3	30283899	29548755	26716343	90.4144	24707086	83.6146	6016661	24.3519	87121	0.9668	0.640267	1.09693	1.16754
H3K4me1.t8_rep1	38054107	36970399	32982487	89.2132	31835277	86.1101	3764222	11.824	64866	0.9867	0.668793	1.04019	1.03652
H3K4me1.t8_rep2	32158640	31589961	27955812	88.4958	26798503	84.8323	1703949	6.3583	35950	0.9829	0.708083	1.02686	1.00628
H3K4me1.t8_rep3	40232253	39414114	35220234	89.3594	20475705	51.9501	5689847	27.7882	74657	0.9693	0.627598	1.07056	1.11858
H3K4me1.t10_rep1	28310246	27821328	24791328	89.109	24213432	87.0319	180221	0.7443	4088	0.9887	0.734152	1.02178	0.91975
H3K4me1.t10_rep2	35135778	34470556	31121401	90.284	29266786	84.9037	4797280	16.3915	51086	0.977	0.658768	1.06046	1.20215
H3K4me1.t10_rep3	50510478	49451250	44715821	90.424	37663930	76.1637	1956682	5.1951	21212	0.958	0.550472	1.06206	1.29114
H3K4me1.t12_rep1	30927779	29298125	25717223	87.7777	25013264	85.3749	170841	0.683	4535	0.9873	0.738432	1.01655	0.814045
H3K4me1.t12_rep2	30504189	27978993	24923775	89.0803	23611932	84.3916	3949363	16.7261	58425	0.9758	0.699615	1.04756	1.23934
H3K4me1.t12_rep3	42122411	41247213	36302136	88.0111	33584658	81.4228	5242384	15.6094	80846	0.976	0.63726	1.05371	1.14282
H3K4me2.t00_rep1	42745118	41539109	37746251	90.8691	35909501	86.4474	15938364	44.3848	91349	0.9782	0.676923	1.22253	1.22061
H3K4me2.t00_rep2	27793794	26439830	24008561	90.8045	23020233	87.0664	11242022	48.8353	74710	0.975	0.694641	1.20565	1.39422
H3K4me2.t00_rep3	42776627	41825154	38080565	91.047	34212472	81.7987	17707928	51.7586	75644	0.9594	0.67247	1.34585	1.20809
H3K4me2.t05_rep1	55946482	54345723	49365428	90.8359	46224364	85.0561	22077332	47.7612	88101	0.9767	0.660699	1.2455	1.2227
H3K4me2.t05_rep2	33235133	31101955	28241509	90.803	26970619	86.7167	11929489	44.2314	73425	0.9769	0.688848	1.1777	1.33053
H3K4me2.t05_rep3	39761483	38880376	35570895	91.488	31817388	81.834	15230356	47.868	78436	0.9582	0.645211	1.29335	1.22377
H3K4me2.t1_rep1	33669386	32754237	29785394	90.936	28668501	87.526	10874100	37.9304	82686	0.9802	0.69225	1.19289	1.20877
H3K4me2.t1_rep2	38229383	35060220	32128583	91.6382	29844876	85.1246	14570863	48.8219	66400	0.9674	0.657338	1.24754	1.3652
H3K4me2.t1_rep3	41857217	40931696	37503477	91.6245	33887124	82.7894	18004057	53.1294	82795	0.9595	0.661371	1.38821	1.27728
H3K4me2.t2_rep1	53777232	52254142	47599280	91.0918	45010024	86.1367	13545187	30.0937	73867	0.9825	0.625471	1.12914	1.18283
H3K4me2.t2_rep2	37327806	33563664	30734360	91.5703	28391615	84.5903	13393020	47.1724	66997	0.9652	0.658271	1.23626	1.28003
H3K4me2.t2_rep3	40500078	39564988	36073629	91.1756	32622516	82.4529	17543288	53.7766	84013	0.9586	0.671018	1.39583	1.25726
H3K4me2.t3_rep1	54555665	53050601	47914315	90.3181	46149825	86.992	12103332	26.2261	76496	0.987	0.634059	1.11057	1.18541
H3K4me2.t3_rep3	39312893	38387469	35047841	91.3002	31805270	82.8532	16505166	51.8944	87452	0.9616	0.646177	1.29555	1.25572
H3K4me2.t4_rep1	44155295	42964511	38831045	90.3793	37288306	86.7886	11773506	31.5742	77386	0.9837	0.672638	1.14716	1.20646
H3K4me2.t4_rep2	35895288	35225751	31985620	90.8018	30555484	86.7418	11049773	36.1629	64448	0.9797	0.679321	1.14535	1.26186
H3K4me2.t5_rep1	44785583	43509734	39391453	90.5348	37625417	86.4758	2536612	6.7417	24366	0.9847	0.652334	1.09327	1.26269
H3K4me2.t5_rep2	36800782	36112714	32876178	91.0376	31444504	87.0732	12109894	38.5119	62910	0.9796	0.680564	1.16603	1.34647
H3K4me2.t5_rep3	40130842	39209543	35650935	90.9241	31916426	81.3996	15886368	49.7748	83246	0.9582	0.660231	1.32087	1.23667
H3K4me2.t6_rep1	47690662	46347512	41855796	90.3086	39912214	86.1151	9723129	24.3612	56136	0.9823	0.669267	1.16428	1.21842
H3K4me2.t6_rep2	34684669	34047926	30394761	89.2705	29439011	86.4634	8366444	28.4195	57349	0.9848	0.703342	1.10704	1.28921
H3K4me2.t6_rep3	42346551	41408326	37713701	91.0775	34378446	83.023	17389480	50.5825	83940	0.964	0.676606	1.32806	1.22888
H3K4me2.t7_rep1	45546195	44222723	40163210	90.8203	38040253	86.0196	15884356	41.7567	87408	0.9787	0.668663	1.19962	1.22181
H3K4me2.t7_rep2	39109631	38417959	34848325	90.7084	32786327	85.3411	16061604	48.9887	72734	0.9721	0.702876	1.28935	1.23944
H3K4me2.t7_rep3	43043380	42078240	38610025	91.7576	32993938	78.4109	18277906	55.3977	77031	0.9456	0.619552	1.36666	1.24375
H3K4me2.t8_rep1	43444925	42198656	37977392	89.9966	36863177	87.3562	10233452	27.7606	87568	0.9878	0.661356	1.09075	1.15461
H3K4me2.t8_rep2	41468651	40696698	36780759	90.3777	34578404	84.9661	16391604	47.4041	67607	0.9739	0.699406	1.25587	1.31377
H3K4me2.t8_rep3	34740760	33910640	30658453	90.4095	28125910	82.9412	14450124	51.3765	78155	0.9595	0.687371	1.35641	1.21639
H3K4me2.t10_rep1	29852647	28491586	25661423	90.0666	24740918	86.8358	7179879	29.0202	64619	0.9801	0.721797	1.15798	1.21562
H3K4me2.t10_rep2	37006155	35815367	32551255	90.8862	30408965	84.9047	15076717	49.5798	68183	0.9688	0.667462	1.26704	1.27925
H3K4me2.t10_rep3	48981211	45168325	40873077	90.4905	31895521	70.6147	8745302	27.4185	60069	0.9337	0.544061	1.19846	1.37639
H3K4me2.t12_rep1	45551674	44779544	40077433	89.4994	38456894	85.8804	10576762	27.5029	66128	0.9836	0.68629	1.15016	1.18671
H3K4me2.t12_rep2	46522698	45636490	41615504	91.189	38637937	84.6645	19581386	50.6791	71777	0.9712	0.669733	1.27092	1.24986
H3K4me2.t12_rep3	34228438	33425548	30372677	90.8666	21956402	65.6874	16041080	73.0587	83612	0.9571	0.682079	1.37964	1.24457
H3K4me3.t00_rep1	47400366	45982195	40475615	88.0245	37638018	81.8534	10265128	27.2732	27127	0.9712	0.711294	1.29024	1.32953
H3K4me3.t00_rep2	32405978	31733036	28073679	88.4683	26238907	82.6864	8269119	31.5147	21370	0.9648	0.772851	1.37499	1.50054
H3K4me3.t00_rep3	40767848	39745990	35081778	88.2649	28035576	70.5368	8634208	30.7973	22876	0.9248	0.650428	1.44165	1.2731
H3K4me3.t05_rep1	49797573	48291013	42586005	88.1861	39269372	81.3181	11697148	29.7869	27474	0.9676	0.71623	1.36133	1.33389
H3K4me3.t05_rep2	27856686	27282237	24000841	87.9724	22636981	82.9733	6940887	30.6617	21387	0.9657	0.787961	1.36993	1.47116
H3K4me3.t05_rep3	42997617	41893228	37127664	88.6245	31241514	74.5741	8979657	28.7427	24818	0.9431	0.665699	1.36655	1.30352
H3K4me3.t1_rep1	25296904	24564673	21680232	88.2577	20726493	84.3752	5279702	25.4732	28050	0.972	0.788292	1.2896	1.34255
H3K4me3.t1_rep2	29138616	28519934	25366498	88.943	23797419	83.4413	7139939	30.0029	20993	0.9656	0.760806	1.31513	1.61543
H3K4me3.t1_rep3	44447921	42643643	37883093	88.8364	32304079	75.7535	11154117	34.5285	25255	0.9415	0.707811	1.50011	1.34324
H3K4me3.t2_rep1	46711873	45379134	40471522	89.1853	37846922	83.4015	7412590	19.5857	26209	0.9776	0.670935	1.15888	1.27857
H3K4me3.t2_rep2	34877976	34170988	30708031	89.8657	27739035	81.1771	8959609	32.2996	21344	0.9544	0.734856	1.40995	1.32833
H3K4me3.t2_rep3	38930908	37872771	33664162	88.8875	28686756	75.745	11941201	41.6261	24684	0.9291	0.756084	1.70429	1.32412
H3K4me3.t3_rep1	43049434	41766683	36592739	87.6122	34888256	83.5313	7503798	21.508	26445	0.9798	0.716113	1.20244	1.31042
H3K4me3.t3_rep3	40180315	39091601	34798409	89.0176	29115749	74.4808	11968925	41.108	24470	0.9281	0.723304	1.60141	1.31273
H3K4me3.t4_rep1	50359954	48966958	43145847	88.1121	40750568	83.2205	8568854	21.0275	25110	0.9791	0.684102	1.21388	1.31626
H3K4me3.t4_rep2	40256824	39499777	35191133	89.0919	33270711	84.2301	6610114	19.8676	19578	0.9786	0.703178	1.16385	1.382
H3K4me3.t5_rep1	36885855	35802043	31902286	89.1074	30181821	84.3019	3849299	12.7537	21935	0.9786	0.707864	1.15076	1.3919
H3K4me3.t5_rep2	31826804	30859087	27509248	89.1447	26168592	84.8002	5639436	21.5503	18521	0.9753	0.755961	1.23104	1.44614
H3K4me3.t5_rep3	36841020	34975591	30785778	88.0207	26433464	75.5768	9704571	36.7132	24282	0.9343	0.735045	1.55824	1.32096
H3K4me3.t6_rep1	42203520	40928259	36314105	88.7262	34301092	83.8078	6945320	20.2481	23796	0.9767	0.715706	1.2487	1.32504
H3K4me3.t6_rep2	40479607	34797529	30199917	86.7875	28764207	82.6616	4179447	14.53	19116	0.9799	0.731962	1.10959	1.44937
H3K4me3.t6_rep3	37636038	36574771	32150870	87.9045	27563499	75.362	10627472	38.5563	24028	0.9336	0.738062	1.60276	1.31066
H3K4me3.t7_rep1	33954055	32905428	29065851	88.3314	27600808	83.8791	7117105	25.7858	26198	0.9737	0.757896	1.28952	1.33793
H3K4me3.t7_rep2	48039942	44946241	39708430	88.3464	36234985	80.6184	10319503	28.4793	20766	0.9649	0.718533	1.35578	1.36506
H3K4me3.t7_rep3	32919544	31786991	28250966	88.8758	23749678	74.715	9080048	38.2322	24826	0.9217	0.723596	1.62377	1.3126
H3K4me3.t8_rep1	50250208	48712361	42797157	87.8568	40674418	83.4991	7682084	18.8867	25552	0.9821	0.674878	1.15559	1.27556
H3K4me3.t8_rep2	37212360	34539353	30584326	88.5492	28225157	81.7188	7792303	27.6076	21141	0.964	0.749834	1.34323	1.35177
H3K4me3.t10_rep1	38266245	36963269	32809572	88.7626	31087577	84.1039	6037519	19.421	19871	0.977	0.728225	1.20674	1.31587
H3K4me3.t10_rep2	42020496	38574961	34602223	89.7012	30496076	79.0566	10180396	33.3826	21135	0.9501	0.717684	1.41238	1.38327
H3K4me3.t10_rep3	53564823	52197186	46551412	89.1837	38032532	72.8631	6564478	17.2601	22487	0.9508	0.588011	1.20923	1.44376
H3K4me3.t12_rep1	43936063	43191010	37548310	86.9354	35996055	83.3415	5527175	15.3549	22275	0.9827	0.708684	1.16105	1.28086
H3K4me3.t12_rep2	44100884	40666281	36164732	88.9305	32308594	79.4481	10324425	31.9556	21450	0.9556	0.724646	1.40223	1.3693
H3K4me3.t12_rep3	40318938	39216322	34714813	88.5213	29083285	74.1611	11726964	40.322	24024	0.926	0.735007	1.69793	1.27022
H3K9me3.t00_rep1	56666972	55311099	44176921	79.8699	42474741	76.7924	506838	1.1932	4303	0.9844	0.617964	1.00848	0.475756
H3K9me3.t00_rep2	28140047	27669633	22100374	79.8723	21233497	76.7393	706295	3.3263	12418	0.9796	0.760757	1.01008	0.39414
H3K9me3.t00_rep3	60234289	58759030	47878207	81.4822	36133728	61.4947	208860	0.578	1954	0.9386	0.512067	1.00968	0.624024
H3K9me3.t05_rep1	44787977	43721090	35093540	80.2668	33975302	77.7091	595033	1.7513	7192	0.9856	0.677434	1.00833	0.45083
H3K9me3.t05_rep2	25711198	25271483	20478400	81.0336	19774111	78.2467	419248	2.1201	8027	0.9811	0.779348	1.00873	0.356364
H3K9me3.t05_rep3	48772686	47579712	38196681	80.2793	31916658	67.0803	512185	1.6047	5122	0.9513	0.58892	1.01721	0.839525
H3K9me3.t1_rep1	45709614	44558269	36485514	81.8827	35096601	78.7656	146677	0.4179	1561	0.9859	0.663854	1.00887	0.512961
H3K9me3.t1_rep2	35875236	35247909	28643401	81.2626	26867762	76.2251	355397	1.3227	3854	0.9749	0.702899	1.01023	0.520107
H3K9me3.t1_rep3	42972077	41928261	33402615	79.6661	31116112	74.2127	382600	1.2295	3760	0.9747	0.666095	1.01199	0.583291
H3K9me3.t2_rep1	58743667	57179619	47957065	83.8709	45671307	79.8734	88716	0.1942	706	0.9862	0.594931	1.00838	0.581087
H3K9me3.t2_rep2	35269938	32985876	27174520	82.3822	25409451	77.0313	909324	3.5786	9413	0.9729	0.707849	1.01053	0.512066
H3K9me3.t2_rep3	39522190	38574963	30327992	78.6209	28021193	72.6408	761609	2.7179	8758	0.9714	0.68094	1.01369	0.580693
H3K9me3.t3_rep1	43393697	42381182	34682288	81.8341	33711769	79.5441	22452	0.0665	175	0.9876	0.683646	1.0072	0.446476
H3K9me3.t3_rep2	31161933	29567456	24068323	81.4013	23026692	77.8785	316186	1.3731	5384	0.9791	0.746016	1.00886	0.408871
H3K9me3.t3_rep3	49408074	48184604	38191432	79.2606	34167141	70.9088	1491570	4.3655	14767	0.9681	0.618204	1.0144	0.656768
H3K9me3.t4_rep1	59541360	58116236	47998003	82.5896	46323814	79.7089	21948	0.0473	156	0.9878	0.603223	1.00591	0.457643
H3K9me3.t4_rep2	38803202	35549438	29731474	83.6341	28224739	79.3957	71812	0.2544	1019	0.9802	0.70647	1.00746	0.46285
H3K9me3.t4_rep3	46835040	45641158	37327050	81.7837	33555871	73.521	418941	1.2484	3992	0.9697	0.633503	1.01031	0.640854
H3K9me3.t5_rep1	44572949	43443613	37526075	86.3788	36001729	82.87	0	0	0	0.9871	0.66004	1.00718	0.665847
H3K9me3.t5_rep2	28294470	26530995	22087061	83.25	21128585	79.6373	120493	0.5702	1898	0.9783	0.765357	1.0079	0.408481
H3K9me3.t5_rep3	48677252	47514907	37891756	79.747	33436000	70.3694	423687	1.2671	4202	0.9641	0.620482	1.01283	0.680538
H3K9me3.t6_rep1	49306171	48041004	40042691	83.351	38772509	80.7071	0	0	0	0.9882	0.650908	1.00617	0.454731
H3K9me3.t6_rep2	30853980	29089218	23542923	80.9335	22544020	77.4995	116279	0.5157	1446	0.9785	0.755638	1.00732	0.341382
H3K9me3.t6_rep3	40007234	39031589	30724412	78.7167	27636612	70.8057	793568	2.8714	10646	0.9632	0.66737	1.01381	0.59551
H3K9me3.t7_rep1	47773937	46542174	37769660	81.1514	36584361	78.6047	560118	1.531	6188	0.9872	0.661617	1.0081	0.467398
H3K9me3.t7_rep2	38307106	37677936	30328157	80.4931	29347488	77.8903	697075	2.3752	8843	0.985	0.705263	1.00778	0.378679
H3K9me3.t7_rep3	34362463	33254566	26372839	79.3059	23864465	71.7629	719687	3.0157	10446	0.9615	0.693142	1.01498	0.59424
H3K9me3.t8_rep1	41276511	40607808	33310924	82.0308	32102228	79.0543	111987	0.3488	1508	0.985	0.692036	1.00711	0.43293
H3K9me3.t8_rep2	36245728	35632630	28932608	81.1969	27861503	78.1909	523116	1.8775	7542	0.9837	0.717995	1.00743	0.388484
H3K9me3.t8_rep3	54709221	53361552	42195138	79.074	35047389	65.6791	418712	1.1947	3682	0.9526	0.571671	1.01151	0.578582
H3K9me3.t10_rep1	34783032	33165893	27712326	83.5567	26596433	80.1921	16870	0.0634	142	0.9825	0.731216	1.00689	0.435391
H3K9me3.t10_rep2	72116852	70237765	57383739	81.6992	53716401	76.4779	266481	0.496	1488	0.9832	0.539814	1.00905	0.549286
H3K9me3.t10_rep3	33185617	30388503	25270022	83.1565	23468496	77.2282	13931	0.0593	119	0.9706	0.726464	1.01098	0.749003
H3K9me3.t12_rep1	49709602	48943123	40247784	82.2337	39041264	79.7686	12770	0.0327	44	0.9876	0.655888	1.00446	0.352063
H3K9me3.t12_rep2	25569991	25128264	20024074	79.6874	19363132	77.0571	1266716	6.5418	28915	0.9811	0.774364	1.01034	0.365265
H3K9me3.t12_rep3	44836448	43727549	34111330	78.0087	32147260	73.5171	1682985	5.2352	21398	0.9787	0.666696	1.01147	0.494676
HES2.t00_rep1	21135967	20635115	17082262	82.7824	16693671	80.8993	99483	0.5959	3242	0.987	0.826782	1.02052	0.960874
HES2.t00_rep2	19474568	18944091	16131814	85.1548	15849310	83.6636	45132	0.2847	1475	0.9895	0.83086	1.01656	0.828984
HES2.t05_rep1	20857730	20355645	17281586	84.8982	16934484	83.193	67170	0.3966	2301	0.9885	0.824089	1.01586	0.814852
HES2.t05_rep2	18355645	17817843	15572709	87.3995	15252616	85.603	5644	0.037	188	0.9871	0.829977	1.00951	0.661764
HES2.t05_rep3	22641667	21904478	19302862	88.1229	18262556	83.3736	635	0.0034	18	0.9676	0.755687	1.01213	1.16277
HES2.t1_rep1	22441391	21920222	19303369	88.0619	18515182	84.4662	16021	0.0865	456	0.9788	0.787083	1.01322	0.923285
HES2.t1_rep2	18933372	18348970	15611458	85.0808	15309077	83.4328	293203	1.9152	8129	0.9877	0.827677	1.04917	1.40802
HES2.t1_rep3	19483082	18858925	16387341	86.8943	15882066	84.2151	266	0.0016	7	0.9815	0.807178	1.01351	0.916862
HES2.t2_rep1	21327763	20863299	18039044	86.463	17655041	84.6224	70574	0.3997	2142	0.9881	0.81556	1.0152	0.874665
HES2.t2_rep2	18553372	17986816	15488216	86.1087	15190247	84.4521	200535	1.3201	5871	0.9878	0.833294	1.03593	1.26787
HES2.t3_rep1	20807822	20302677	17673906	87.052	17020923	83.8358	11392	0.0669	358	0.9795	0.806422	1.01179	0.841975
HES2.t3_rep2	19378377	18845401	16205338	85.9909	15780256	83.7353	276017	1.7491	7473	0.9838	0.822159	1.04618	1.4167
HES2.t4_rep1	21010225	20542845	17778275	86.5424	17270036	84.0683	199608	1.1558	5487	0.9843	0.814104	1.03117	1.30394
HES2.t4_rep2	16939091	16485864	14281117	86.6264	13997345	84.9051	117605	0.8401	3559	0.9866	0.840983	1.02884	1.15234
HES2.t5_rep1	18466535	18122276	15808657	87.2332	14808790	81.7159	117192	0.7913	3432	0.9605	0.79441	1.03087	1.55743
HES2.t5_rep2	18933623	18380485	16048641	87.3134	13232888	71.9942	174659	1.3198	5176	0.8884	0.704398	1.05924	2.16107
HES2.t5_rep3	15900622	15349493	13133961	85.566	12836908	83.6308	183055	1.426	4909	0.982	0.847362	1.04668	1.36989
HES2.t6_rep1	21735383	21321754	18675768	87.5902	16973136	79.6047	35822	0.211	861	0.9503	0.75147	1.02672	1.61458
HES2.t6_rep2	19656363	19223222	16404965	85.3393	15906725	82.7474	603815	3.7959	13960	0.981	0.819953	1.11185	1.77932
HES2.t6_rep3	17722634	17170833	15008274	87.4056	14502010	84.4572	93734	0.6463	2703	0.9752	0.808963	1.0255	1.2639
HES2.t7_rep1	20346058	19931676	17420057	87.3988	16654096	83.5559	105483	0.6333	3157	0.975	0.797425	1.02362	1.27492
HES2.t7_rep2	16312014	15916459	13751475	86.3978	13335226	83.7826	143179	1.0736	4863	0.979	0.843028	1.03096	1.17314
HES2.t7_rep3	20447259	19674099	17101281	86.9228	16310819	82.905	29446	0.1805	787	0.9733	0.791153	1.01551	0.999722
HES2.t8_rep1	16795366	16467170	14055187	85.3527	13655763	82.9271	398560	2.9186	11318	0.9802	0.842634	1.08073	1.5979
HES2.t8_rep2	20978652	20461947	17489088	85.4712	16942560	82.8003	248370	1.4659	6437	0.9822	0.809753	1.04351	1.44034
HES2.t8_rep3	17941913	17405918	14966510	85.9851	14500757	83.3093	102893	0.7095	3398	0.9798	0.828761	1.02183	1.0189
HES2.t10_rep1	17313880	16917313	14609773	86.3598	14294781	84.4979	124030	0.8676	3868	0.9856	0.841161	1.02538	1.06308
HES2.t10_rep2	16782230	16393196	14120372	86.1355	13863287	84.5673	406407	2.9315	10736	0.9872	0.847376	1.08715	1.72327
HES2.t10_rep3	19386804	18638370	15883658	85.2202	15483213	83.0717	104986	0.678	3197	0.9805	0.822235	1.02411	1.03443
HES2.t12_rep1	21442120	21005520	18315096	87.1918	17915973	85.2917	180214	1.0058	4939	0.9878	0.808021	1.02607	1.19059
HES2.t12_rep2	20787374	20262097	17575209	86.7393	17284341	85.3038	130471	0.7548	3565	0.9903	0.813284	1.02491	1.15558
HES2.t12_rep3	16028727	15394934	13064551	84.8626	12780480	83.0174	39933	0.3124	1506	0.983	0.85204	1.01984	0.813218
JunB.t00_rep2	25195525	24500854	21164840	86.384	20646747	84.2694	806741	3.9073	13676	0.9875	0.783717	1.08784	1.99842
JunB.t00_rep3	21963780	21329551	18814291	88.2076	18319694	85.8887	548895	2.9962	11264	0.9855	0.789557	1.06268	1.7392
JunB.t05_rep2	22487156	21828574	18803707	86.1426	18382120	84.2112	656695	3.5724	13489	0.9875	0.799205	1.06955	1.84771
JunB.t05_rep3	22852613	22220801	19176791	86.301	18733205	84.3048	519879	2.7751	12657	0.9876	0.803464	1.05001	1.52918
JunB.t1_rep2	25507875	24803359	21297988	85.8673	20732828	83.5887	557401	2.6884	12568	0.9869	0.780814	1.0522	1.67648
JunB.t1_rep3	21135023	20483691	17842740	87.107	17355449	84.7281	936405	5.3954	19033	0.9839	0.804588	1.12407	1.97129
JunB.t2_rep2	20844511	20239268	17710866	87.5074	17313365	85.5434	383225	2.2134	8568	0.9871	0.802688	1.04735	1.57704
JunB.t2_rep3	21864279	21267584	18847674	88.6216	18224191	85.6899	726937	3.9888	13448	0.9816	0.777293	1.08925	1.82648
JunB.t3_rep1	22070414	21526330	18544431	86.1476	18098085	84.0741	238265	1.3165	6436	0.987	0.809112	1.02749	1.2285
JunB.t3_rep2	21579267	20962912	17957238	85.6619	17541412	83.6783	289700	1.6515	8180	0.9872	0.815365	1.03144	1.24263
JunB.t3_rep3	27585798	26705070	22874281	85.6551	22248312	83.3111	242848	1.0915	5067	0.9874	0.771467	1.02679	1.27524
JunB.t4_rep1	25210568	24596583	21319959	86.6785	20744841	84.3403	76979	0.371	1863	0.9871	0.781092	1.01399	0.934407
JunB.t4_rep2	20167707	19639136	17219239	87.6781	16520644	84.121	537786	3.2552	12162	0.9763	0.797765	1.07606	1.79492
JunB.t4_rep3	23686801	23032600	19934333	86.5483	19317260	83.8692	1092402	5.655	18659	0.9831	0.789123	1.13884	1.87401
JunB.t5_rep1	22365456	21826414	19153978	87.7559	18587791	85.1619	640873	3.4478	13078	0.984	0.789955	1.07191	1.89853
JunB.t5_rep2	21417665	20836401	17906827	85.9401	17340452	83.2219	405239	2.3369	10667	0.9823	0.808526	1.04777	1.5421
JunB.t5_rep3	26402061	25637645	22074993	86.1038	21485433	83.8042	471390	2.1939	8338	0.9872	0.781067	1.05086	1.61695
JunB.t6_rep1	20656116	20132606	17905375	88.9371	16854264	83.7162	871975	5.1736	12639	0.9646	0.766008	1.16796	1.73708
JunB.t6_rep2	23899938	23271838	20436288	87.8155	19971498	85.8183	710717	3.5586	13449	0.9879	0.782569	1.07413	1.81088
JunB.t7_rep1	21776389	21227750	18595400	87.5994	17958882	84.6009	492084	2.74	11843	0.9813	0.787605	1.0473	1.60157
JunB.t7_rep2	19391826	18866458	16485561	87.3802	16080056	85.2309	110477	0.687	3529	0.9855	0.823305	1.01716	0.953249
JunB.t7_rep3	21917811	21337943	18941645	88.7697	18070115	84.6853	307843	1.7036	6156	0.9749	0.76918	1.04668	1.51679
JunB.t8_rep1	22698043	21998147	19208880	87.3204	18686286	84.9448	1237957	6.6249	21160	0.9844	0.792585	1.14766	1.90384
JunB.t8_rep2	22536730	21943379	19188810	87.4469	18584434	84.6926	290236	1.5617	7359	0.9836	0.794028	1.02834	1.31726
JunB.t8_rep3	21267537	20697139	17915055	86.5581	17307190	83.6211	819480	4.7349	16722	0.9804	0.799468	1.10789	1.82755
JunB.t10_rep1	21169920	20546252	17478620	85.0696	17033791	82.9046	1020297	5.9898	20481	0.9841	0.793788	1.14588	2.0459
JunB.t10_rep2	21967152	21400863	18628728	87.0466	18190119	84.9971	396450	2.1794	9035	0.9871	0.80002	1.04422	1.63132
JunB.t10_rep3	25373751	24621006	21988871	89.3093	21013616	85.3483	674349	3.2091	11259	0.9786	0.745232	1.07289	1.65393
JunB.t12_rep1	24824870	24148674	20924982	86.6506	20371119	84.357	897427	4.4053	16394	0.9863	0.783767	1.0933	1.88369
JunB.t12_rep2	20512826	19887159	17166914	86.3216	16598480	83.4633	2151824	12.9639	38990	0.9771	0.820583	1.389	1.88199

## Sheet: dnase-seq
sample	reads sequenced	reads mapped	% of reads mapped	reads mapped after de-dup & filtering	% of reads mapped after de-dup & filtering	reads mapped in within-replicate peaks	% of reads mapped in within-replicate peaks	reads mapped in across-replicate peaks	% of reads mapped in across-replicate peaks	within-replicate peaks	across-replicate peaks	% of reads unique	PBC	NSC	RSC
t00_rep2	24368260	17247458	70.7783	10806864	44.3481	2402267	22.229	2956793	27.3603	59282	114472	0.7102	0.604857	2.05052	1.27897
t00_rep3	38332820	26799401	69.9124	19567499	51.0463	2877326	14.7046	3675400	18.7831	59038	114472	0.8418	0.658394	1.45159	1.2895
t00_rep4	32503941	23168822	71.28	21800349	67.0698	3989681	18.3009	4694577	21.5344	69481	114472	0.9331	0.82498	1.54959	1.34466
t00_rep5	43186859	30326947	70.2226	27657266	64.0409	3943873	14.2598	4736531	17.1258	72082	114472	0.9367	0.782312	1.31457	1.34176
t05_rep1	30017024	21689739	72.2581	21003950	69.9734	3619438	17.2321	4572799	21.7711	67562	136835	0.952	0.852957	1.47626	1.32124
t05_rep2	31789596	22771048	71.6305	19786329	62.2415	3196005	16.1525	4096045	20.7013	68944	136835	0.9011	0.78286	1.44559	1.29564
t05_rep3	47410159	33611740	70.8956	29226947	61.647	4483732	15.341	5566010	19.0441	76443	136835	0.9205	0.734663	1.34539	1.22136
t05_rep4	34835207	24934172	71.5775	23206326	66.6174	3562930	15.3532	4576937	19.7227	66951	136835	0.9394	0.815118	1.38971	1.25498
t05_rep5	43837884	31328589	71.4646	26095265	59.5267	5332153	20.4334	6384192	24.4649	77690	136835	0.888	0.706692	1.58787	1.24838
t1_rep1	31715583	22829703	71.9826	22006331	69.3864	2993993	13.6051	3988617	18.1248	64503	134972	0.9611	0.853677	1.32217	1.36477
t1_rep2	28774469	20461183	71.1088	18024641	62.641	2576821	14.2961	3475347	19.281	62596	134972	0.9069	0.796785	1.34474	1.27604
t1_rep3	49955280	35584585	71.2328	33250971	66.5614	5650886	16.9946	6804596	20.4643	75054	134972	0.9428	0.779303	1.43458	1.30086
t1_rep4	35042184	24788546	70.7391	19592712	55.9117	3563723	18.189	4522186	23.0809	66644	134972	0.8575	0.702034	1.56671	1.23086
t1_rep5	48118448	34619992	71.9474	32504748	67.5515	5459659	16.7964	6571627	20.2174	78309	134972	0.9478	0.78526	1.37682	1.21757
t2_rep1	31639823	22802907	72.0702	21730404	68.6805	3510323	16.1539	4389469	20.1996	71582	125209	0.9479	0.836636	1.39608	1.26923
t2_rep2	31167642	22096481	70.8955	18603066	59.6871	3100994	16.6692	3983274	21.4119	63730	125209	0.8813	0.754136	1.504	1.32673
t2_rep4	29933524	21258487	71.0189	17680841	59.067	3802335	21.5053	4694030	26.5486	64781	125209	0.8571	0.741327	1.80117	1.30478
t2_rep5	40863715	29055848	71.1042	26707302	65.357	4823906	18.0621	5808422	21.7484	72617	125209	0.9284	0.788283	1.4819	1.31363
t3_rep1	30925841	22156802	71.6449	21082242	68.1703	2652807	12.5831	3608504	17.1163	65996	139042	0.9561	0.84756	1.27788	1.38334
t3_rep2	29817202	21111854	70.8042	15863377	53.202	2590148	16.3278	3442236	21.6992	66555	139042	0.8293	0.693309	1.46144	1.22371
t3_rep3	45667787	32670248	71.5389	32000720	70.0728	7597763	23.7424	8800548	27.501	77322	139042	0.9402	0.802885	1.69154	1.11206
t3_rep5	41939173	29902150	71.2988	26469175	63.1132	4068446	15.3705	5130657	19.3835	72982	139042	0.9232	0.760466	1.33952	1.26039
t4_rep2	38656145	27153755	70.2443	15626413	40.4241	3397261	21.7405	4351236	27.8453	65344	138891	0.7434	0.507795	1.82054	1.21727
t4_rep3	46255661	32475774	70.2092	27064484	58.5106	4727111	17.4661	5924468	21.8901	73839	138891	0.8963	0.703327	1.42786	1.25111
t4_rep4	37386050	26895569	71.9401	24043835	64.3123	4946292	20.5719	6115887	25.4364	68985	138891	0.9057	0.767268	1.68592	1.30154
t4_rep5	41502439	29643315	71.4254	28738985	69.2464	4358469	15.1657	5502592	19.1467	73890	138891	0.9647	0.830564	1.32401	1.27419
t5_rep1	29669698	21357847	71.9853	19436657	65.5101	3034820	15.6138	3976230	20.4573	65046	144752	0.9214	0.811222	1.42074	1.30955
t5_rep2	45829489	32286347	70.4488	20366132	44.4389	4590010	22.5374	5483824	26.9261	78803	144752	0.7916	0.528291	1.75534	1.17734
t5_rep3	42828806	30781202	71.8703	29200212	68.1789	4744744	16.249	5875396	20.121	74266	144752	0.9517	0.80275	1.36705	1.28987
t5_rep5	44073376	31193064	70.7752	29513936	66.9654	4301448	14.5742	5456283	18.4871	68043	144752	0.9515	0.80612	1.35128	1.31176
t6_rep1	41780868	29739277	71.1791	24368895	58.3254	4095705	16.8071	5243757	21.5182	67391	135959	0.8854	0.706777	1.4734	1.29359
t6_rep2	38786936	27405670	70.6569	18944292	48.8419	3648245	19.2577	4673090	24.6675	65136	135959	0.8125	0.609257	1.63984	1.24328
t6_rep3	47555539	33614772	70.6852	27499061	57.8251	4585999	16.6769	5736059	20.8591	74301	135959	0.8934	0.685529	1.40433	1.24039
t6_rep5	43611367	31035093	71.1628	29490885	67.622	4068874	13.797	5216126	17.6872	68992	135959	0.9567	0.810257	1.30026	1.2822
t7_rep1	46440119	32681539	70.3735	27285440	58.754	4094449	15.0059	5326085	19.5198	71312	148473	0.9035	0.710621	1.35232	1.2388
t7_rep2	64993497	46618474	71.7279	44394606	68.3062	9777434	22.0239	11115206	25.0372	86553	148473	0.9376	0.745977	1.5088	1.21352
t7_rep3	33419022	23543027	70.4479	18561800	55.5426	2873367	15.48	3925848	21.1501	56813	148473	0.8579	0.713279	1.51828	1.3573
t7_rep5	48056617	34352353	71.483	32375004	67.3684	5332106	16.4698	6559684	20.2615	79689	148473	0.9501	0.789195	1.35404	1.26393
t8_rep1	25215519	17948372	71.1798	14869742	58.9705	2474603	16.6418	3450302	23.2035	61979	165082	0.858	0.766255	1.49608	1.29238
t8_rep2	31394877	22486361	71.6243	19281867	61.4172	3915074	20.3044	5086864	26.3815	65859	165082	0.8775	0.760729	1.76521	1.3872
t8_rep3	47874944	33972930	70.9618	30199853	63.0807	4859983	16.0927	6297796	20.8537	78306	165082	0.927	0.741685	1.35063	1.2407
t8_rep4	37146750	26793477	72.1287	25221755	67.8976	5563275	22.0574	6839110	27.1159	73733	165082	0.9245	0.800338	1.74662	1.24926
t8_rep5	42488580	30134595	70.9239	25877737	60.9051	4218246	16.3006	5541482	21.414	73437	165082	0.9084	0.736447	1.38699	1.21993
t10_rep1	36182439	25856536	71.4615	16006934	44.2395	4124175	25.7649	5082990	31.7549	66959	146518	0.7508	0.544822	2.26992	1.34009
t10_rep2	65214894	46459992	71.2413	40638568	62.3148	8329680	20.4969	9652341	23.7516	87009	146518	0.9168	0.681475	1.47551	1.16843
t10_rep3	41368769	29654231	71.6826	24076833	58.2005	4238357	17.6034	5336804	22.1657	75496	146518	0.8828	0.695922	1.44422	1.20048
t10_rep5	46265415	32991819	71.3098	29384263	63.5123	5999372	20.4169	7133543	24.2767	80842	146518	0.9145	0.747011	1.57842	1.27308
t12_rep1	32496086	23054321	70.9449	18109002	55.7267	3011177	16.628	4035581	22.2849	61761	155400	0.8529	0.713381	1.52743	1.30524
t12_rep2	27606885	19658956	71.2103	12109086	43.8625	3111690	25.6971	3876077	32.0096	65256	155400	0.7109	0.575908	2.41471	1.38595
t12_rep3	73680155	52921294	71.8257	44673759	60.632	8659839	19.3846	10185808	22.8004	90173	155400	0.9145	0.632595	1.41929	1.18786
t12_rep5	43356729	30746051	70.9141	27167704	62.6608	4471002	16.457	5606386	20.6362	75773	155400	0.9211	0.756339	1.40207	1.30248

## Sheet: rna-seq
sample	reads sequenced	reads after trimming	reads mapped 1-pass	% reads mapped 1-pass	reads mapped 2-pass	% reads mapped 2-pass	reads mapped 2-pass multiply	% reads mapped 2-pass multiply	reads quant. in genes	% reads quant. in genes	reads quant. in transcripts	% reads quant. in transcripts	% reads unique
t00_rep1	83719718	79910954	51484936	64.4278	51473134	64.4131	6574394	8.2271	47222238	59.0935	4.39523e+07	55.0015	0.3129
t00_rep2	146849710	140220904	90921366	64.8415	90896860	64.824	11772808	8.3959	83662344	59.6647	7.84414e+07	55.9413	0.6028
t00_rep3	141075640	134532352	86255310	64.1149	86239996	64.1035	11021986	8.19281	76900176	57.1611	7.12698e+07	52.9759	0.6652
t00_rep4	175052318	166845564	128259708	76.8733	128209556	76.8432	12633838	7.5721	116710310	69.9511	1.12768e+08	67.5884	0.3045
t05_rep1	82237500	78512942	51867670	66.0625	51847422	66.0367	5846406	7.4464	45234982	57.6146	4.18722e+07	53.3315	0.351
t05_rep2	81072472	77486270	49141614	63.4197	49127276	63.4012	7655296	9.8795	44871732	57.9092	4.20765e+07	54.3018	0.2994
t05_rep3	114796178	109745740	72331234	65.908	72312068	65.8905	9289038	8.4641	66445186	60.5446	6.22277e+07	56.7017	0.3061
t05_rep4	86040630	81943458	66034202	80.585	66006870	80.5517	6250518	7.6278	60149746	73.4039	5.85953e+07	71.5069	0.2978
t1_rep1	59785172	57207116	34762708	60.7664	34749830	60.7438	4280222	7.4819	32103132	56.1173	2.95986e+07	51.7394	0.2953
t1_rep2	60863854	58324030	37925120	65.0248	37909248	64.9976	4112544	7.0511	34859902	59.7693	3.22506e+07	55.2954	0.3138
t1_rep3	63324516	60967106	47963584	78.6712	47946382	78.643	5049060	8.2816	44096436	72.3282	4.30493e+07	70.6106	0.311
t1_rep4	85440118	81132258	56274768	69.3617	56250028	69.3312	5857552	7.2197	51335084	63.2733	4.84982e+07	59.7767	0.3353
t2_rep1	69436950	66316076	43264620	65.24	43252000	65.2209	5235228	7.8943	40071020	60.4242	3.77488e+07	56.9224	0.2903
t2_rep2	66954804	63836782	44146416	69.1551	44132590	69.1334	5205348	8.1541	40807318	63.9244	3.89928e+07	61.082	0.2829
t2_rep3	62489658	59698668	43578054	72.9966	43566324	72.977	5189004	8.6919	39967084	66.948	3.87657e+07	64.9355	0.2717
t2_rep4	86431102	81532722	55181108	67.6797	55159364	67.653	5421226	6.6491	50467504	61.8984	4.76071e+07	58.3901	0.3242
t3_rep1	85647546	82005620	55421210	67.5822	55403808	67.5609	6169616	7.5234	51224394	62.4644	4.863e+07	59.3008	0.289
t3_rep2	64553082	61485800	40689652	66.1773	40678408	66.159	5167538	8.4044	37362430	60.7659	3.52381e+07	57.3109	0.3004
t3_rep3	65470236	62591902	46662830	74.5509	46645402	74.523	4999556	7.9875	41548218	66.3795	4.01242e+07	64.1045	0.3007
t3_rep4	84833362	80407634	53329930	66.3244	53311000	66.3009	5219398	6.4911	47998832	59.6943	4.47007e+07	55.5926	0.3416
t4_rep1	79837806	76597548	49409240	64.5049	49392110	64.4826	6655560	8.6889	45774446	59.7596	4.30494e+07	56.202	0.2899
t4_rep2	76030008	72585950	46986430	64.7321	46976534	64.7184	5396186	7.4342	42890438	59.0891	4.01506e+07	55.3145	0.3079
t4_rep3	69051510	66382752	47550598	71.6309	47538436	71.6126	5357958	8.0713	43642454	65.7436	4.20355e+07	63.3228	0.2957
t4_rep4	89436120	85102276	57397212	67.4449	57375516	67.4194	5500696	6.4636	52503992	61.6951	49378168	58.0221	0.3308
t5_rep2	80243130	76470188	52094308	68.1236	52082766	68.1085	5616664	7.3449	47440096	62.0373	4.47801e+07	58.5589	0.3139
t5_rep3	44667132	42863478	29259164	68.2612	29250038	68.24	3443668	8.034	26783300	62.4851	2.55014e+07	59.4943	0.2975
t5_rep4	87652412	83815088	63719076	76.0233	63695996	75.9958	6132198	7.3163	57701386	68.8436	5.47747e+07	65.3517	0.3411
t6_rep2	85901018	82055218	53357660	65.0265	53345072	65.0111	6693924	8.1578	48828458	59.5068	4.54344e+07	55.3705	0.3144
t6_rep3	48477678	46432700	31939380	68.7863	31932906	68.7724	3404438	7.3319	29056112	62.5768	2.76887e+07	59.6318	0.2985
t6_rep4	84935440	80571024	56715970	70.3925	56699638	70.3722	5753434	7.1408	51608140	64.0529	4.88396e+07	60.6168	0.3
t7_rep1	67617596	64680740	41997066	64.9297	41988728	64.9168	4734492	7.3197	38555934	59.6096	3.60712e+07	55.768	0.3045
t7_rep2	82965972	79289530	53990040	68.0922	53979550	68.079	5699682	7.1884	49384008	62.2831	4.65841e+07	58.7519	0.313
t7_rep3	96998594	92833486	60465782	65.1335	60450182	65.1167	7244322	7.8035	55533630	59.8206	5.18785e+07	55.8834	0.3113
t7_rep4	81601552	77424312	55789026	72.0562	55769452	72.0309	5546100	7.1632	50905768	65.749	4.85921e+07	62.7608	0.2926
t8_rep1	65579634	62608966	41482872	66.257	41474136	66.2431	4628918	7.3933	38209456	61.0287	3.59517e+07	57.4226	0.296
t8_rep2	78064390	74488536	48078754	64.5451	48073904	64.5386	6263070	8.408	44237674	59.3885	4.16859e+07	55.9628	0.3009
t8_rep3	78915200	75548082	49624814	65.6863	49619084	65.6788	6295532	8.3331	45605944	60.3667	4.33985e+07	57.4448	0.2888
t8_rep4	88152208	84012658	60885136	72.4713	60865130	72.4475	6218400	7.4017	55335354	65.8654	5.27294e+07	62.7636	0.3057
t10_rep1	67686308	64695116	42369144	65.4904	42357372	65.4722	4691574	7.2518	39188546	60.5741	3.69679e+07	57.1417	0.29
t10_rep2	71465868	67850804	48504846	71.4875	48499438	71.4795	5740096	8.4598	44353408	65.369	4.26109e+07	62.8009	0.2802
t10_rep3	62669124	59837162	42533918	71.0827	42526920	71.071	4946374	8.2663	39433998	65.9021	3.79478e+07	63.4184	0.2769
t10_rep4	89497396	84674532	65475470	77.326	65452128	77.2984	6618154	7.8159	59323192	70.0602	5.6924e+07	67.2267	0.3086
t12_rep1	65390544	62180084	42879128	68.9595	42865874	68.9382	4860334	7.8165	39539426	63.5885	3.7443e+07	60.217	0.2769
t12_rep2	73532318	70376056	48331472	68.676	48319686	68.6592	5212970	7.4073	44511188	63.2476	4.21185e+07	59.8477	0.3046
t12_rep3	73559150	70561588	47503838	67.3225	47496890	67.3126	5349656	7.5815	43315976	61.3874	4.06849e+07	57.6587	0.3071
t12_rep4	101276036	96537430	70802420	73.3419	70781848	73.3206	7010378	7.2618	64203738	66.5065	6.13586e+07	63.5593	0.3045
