# Supplementary material for: Glucocorticoid receptor recruits to enhancers and drives activation by motif-directed binding
Source: HighWire-hosted journal article supplement (doi:10.1101/gr.233346.117), 2018-08-10
Supplement: Supplemental_TableS7.xlsx [file Supplemental_TableS7.xlsx]

## Sheet: Sheet1
Assigned name	JASPAR motif names, clustered by RSAT
AP-1	MAFG,NRL,Mafb,MAF::NFE2,MAFF,MAFK,FOS::JUN,Nfe2l2,Bach1::Mafk,JDP2,FOSL2,JUNB,NFE2,FOSL1,FOS,JUND,BATF::JUN,JUN_var_2_
ARID5A	Arid5a
C/EBP	CEBPA,CEBPG,CEBPD,CEBPB,CEBPE,NFIL3,HLF,DBP,TEF
CACCTG	Myb,ZBTB18,Tcf21,TAL1::TCF3,PKNOX1,PKNOX2,TGIF1,TGIF2,Myod1,SNAI2,FIGLA,ID4,TCF3,TCF4,TFAP4,MSC,MYF6,Myog,Tcf12,NHLH1,Ascl2
CENPB	CENPB
CREB/ATF	XBP1,CREB3,CREB3L1,GMEB2,CREB1,Atf3,Atf1,Crem,ATF4,JUN,JUND_var_2_,JDP2_var_2_,Creb5,ATF7,BATF3
CTCF	CTCF
DDIT3::CEBPA	Ddit3::Cebpa
ETS	HINFP,SPIC,SPI1,Gabpa,ETV2,ELK4,ETV6,ETV5,FEV,ETV1,ETV4,FLI1,ERG,ETS1,ELK1,ELK3,ERF,ETV3,SPDEF,ELF5,ELF3,EHF,ELF1,ELF4
FOX	FOXP3,FOXI1,FOXO4,FOXO6,FOXL1,FOXD2,FOXO3,FOXD1,FOXG1,Foxj2,SRY,Sox5,Foxo1,FOXP2,Foxq1,Foxd3,FOXA1,Foxj3,Foxk1,FOXP1,FOXF2,Foxa2,FOXC2,FOXC1,FOXB1
GA-rich	EWSR1-FLI1,ZNF263
GMEB1	Gmeb1
GR	Ar,NR3C2,NR3C1
HNF/POU	HNF1B,HNF1A,POU4F1,POU4F2,POU4F3
HOX	PBX1,Hoxc9,Hoxa9,HOXC10,HOXD11,HOXC13,Hoxa11,HOXC11,HOXD12,HOXC12,CDX2,CDX1,HOXA10,Hoxd9,HOXD13,HOXA13,HOXB13
HOX/ALX/HMX	Hoxb5,Hoxd3,Arx,Alx4,Alx1,Hoxd8,Hmx1,Hmx2,Hmx3
HSF	HSF4,HSF1,HSF2
ISM1,MZF1	INSM1,MZF1_var_2_
KLF	KLF13,SP4,KLF14,Klf12,EGR1,SP2,ZNF740,Klf1,KLF5,Klf4,SP1,SP8,KLF16,SP3,GLI2,ZBTB7A,ZBTB7B,ZBTB7C,EGR2,EGR3,EGR4
MEIS	MEIS1,MEIS2,MEIS3,Pax2,MAFG::NFE2L1
NFIC::TLX1	NFIC::TLX1
NFYA/B	NFYB,NFYA
NRF1	NRF1
PLAG1	PLAG1
POU[X]F	LIN54,Pou5f1::Sox2,POU3F4,POU5F1B,Pou2f3,POU2F2,POU2F1,POU1F1,POU3F3,POU3F1,POU3F2
RAR/RXR[1]	RARA,Rarb,Nr2f6_var_2_,Rarg,Tcf7,TCF7L2,LEF1,Hnf4a,NR1H2::RXRA,HNF4G,Nr2f6,RXRB,Rxra,RXRG,NR2C2,Pparg::Rxra,RORA_var_2_,Nr2e1,Nr5a2,NR2F1,NR4A2,RORA,Esrra,ESRRB,Esrrg
RAR/RXR[2]	Nr1h3::Rxra,Rarg_var_2_
REST	REST
RHOX11	Rhox11
RUNX	GCM1,GCM2,RUNX1,RUNX2,RUNX3
RXR/VDR	Vdr,RXRA::VDR
SCRT	SCRT1,SCRT2
SIX3	Six3
SMAD	SMAD2::SMAD3::SMAD4,Hand1::Tcf3
SOX	SOX10,Sox17,Sox3,Sox6,Sox2,SOX9
SOX8	SOX8
SPZ1	Spz1
TEAD	TEAD3,TEAD4,TEAD1,NFATC2,NFAT5,NFATC1,NFATC3
TFAP2	TFAP2A,TFAP2B_var_2_,TFAP2C_var_2_,TFAP2B_var_3_,TFAP2C_var_3_,TFAP2A_var_3_,TFAP2A_var_2_,TFAP2C,TFAP2B
TGCCAA	NFIA,NFIX,THAP1,HIC2,Hic1
ZFX	Zfx
ZIC/GLIS	ZIC1,ZIC3,ZIC4,GLIS1,GLIS2,GLIS3
ZNF423	Znf423
